# Supplementary material
Source: Royal Society of Chemistry journal article supplement (doi:10.1039/d6em00031b)
Supplement: d6em00031b1.pdf [file d6em00031b1.pdf]

Supplementary material

# Prioritizing Emerging Organic Pollutants in Rivers of Thailand Using Suspect Screening Analysis with High-Resolution Mass Spectrometry

Ittikorn Palee<sup>a</sup>, Futoshi Kurisu<sup>b</sup>, Phanwatt Phungsai<sup>a,c,\*</sup>

<sup>a</sup> Department of Environmental Engineering, Faculty of Engineering, Khon Kaen University, Khon Kaen 40002, Thailand

<sup>b</sup> Research Center for Water Environment Technology, School of Engineering, The University of Tokyo, 7-3-1 Hongo, Bunkyo, Tokyo 113-8656, Japan

<sup>c</sup> Research Center for Environmental and Hazardous Substance Management, Khon Kaen University, Khon Kaen 40002, Thailand

\* Corresponding author: Tel+66-6-4007-0770 e-mail address: [phanphu@kku.ac.th](mailto:phanphu@kku.ac.th)

**Text S1** The general water parameters of the raw water in each water source

The water quality parameters measured across the four rivers (CPR, PhR, PIR, and UTR) revealed notable differences in their physicochemical characteristics (**Table S1**). UTR exhibited the highest turbidity (58.9 NTU), suggesting significant particulate matter or runoff influence, while PhR recorded the lowest turbidity (10.75 NTU), indicating clearer water. PhR also had the highest dissolved organic carbon (DOC) level at 5.27 mg/L, though its SUVA value was the lowest (1.42 L/mg·m), implying the presence of more aliphatic or hydrophilic organic matter. In contrast, PIR demonstrated the highest SUVA value (2.61 L/mg·m), pointing to more aromatic and potentially reactive compounds, despite its relatively low DOC concentration. The pH values of all rivers ranged from 6.53 to 6.81, remaining within a slightly acidic to neutral range suitable for most aquatic life. Dissolved oxygen (DO) levels varied, with PhR showing the highest (6.5 mg/L) and UTR the lowest (4.83 mg/L), potentially reflecting differences in biological activity or pollutant load. Additionally, CPR recorded the highest electrical conductivity (316  $\mu$ S/cm), suggesting a greater concentration of dissolved ions, possibly from industrial or urban sources. These findings underscore the distinct environmental conditions of each river and highlight the importance of region-specific water quality monitoring and management.

## **Text S2** Identification compounds with varying degrees of confidence

To identify suspect peak compounds, each peak was analyzed as described in Section 2.4. Quality assurance and quality control procedures included the use of blank samples to monitor potential contamination. The blanks consisted of 100 % methanol and were inserted after every four samples. Procedural blanks were analyzed to identify and correct any contamination introduced during sampling or laboratory processing. The method's performance was validated by confirming that blank intensities in each run remained consistent, with variations within 5 %. After validation, background subtraction was applied to the sample data. Features were retained only when the peak area in the sample exceeded five times the corresponding area in the blank.

After background subtraction, these MS/MS spectra enabled identification with varying degrees of confidence, following the criteria described in previous studies <sup>1,2</sup>. Profiles with well-supported structural assignments were classified under confidence level 2. Tentative structural assignments corresponded to a confidence level of 3. When only molecular formulae could be determined, the profiles were assigned to confidence level 4. In cases where only exact masses were available, profiles were classified under confidence level 5.

### Text S3 PNEC Calculation Methodology

The Predicted No-Effect Concentration (PNEC) was calculated using established risk assessment frameworks recommended by regulatory authorities, such as the European Chemicals Agency (ECHA). PNEC values are used to estimate concentrations below which adverse effects on the aquatic environment are not expected.

When experimental ecotoxicological data were available, the PNEC was calculated from the lowest relevant toxicity value, such as the No Observed Effect Concentration (NOEC), Lethal Concentration for 50% of the test organisms (LC<sub>50</sub>), or Effective Concentration for 50% (EC<sub>50</sub>). An assessment factor (AF) was then applied to address uncertainty related to interspecies variability and data limitations. The general formula is:

$$\text{PNEC} = \frac{\text{Toxicity Endpoint (e.g., LC}_{50}, \text{EC}_{50}, \text{NOEC})}{\text{AF}}$$

Assessment factors were chosen based on the quality and type of toxicity data as follows:<sup>3</sup>

|                       | Available Data                                                                                           | AFs          |
|-----------------------|----------------------------------------------------------------------------------------------------------|--------------|
| PNEC <sub>water</sub> | 1) At least one short-term L(E)C50 from each of three trophic levels                                     | 1000         |
|                       | 2) One long-term EC10 or NOEC from one trophic level                                                     | 100          |
|                       | 3) Two long-term results (e.g., EC10 or NOECs) from species representing two trophic levels              | 50           |
|                       | 4) Long-term results (e.g., EC10 or NOECs) from at least three species representing three trophic levels | 10           |
|                       | 5) Species sensitivity distribution (SSD) method                                                         | 1–5          |
|                       | 6) Field data or model ecosystems                                                                        | Case by case |

In the absence of experimental data, Quantitative Structure Activity Relationship (QSAR) models were used to estimate ecotoxicity values. These were sourced from public databases such as ECOTOX by the U.S. Environmental Protection Agency (EPA) (<https://cfpub.epa.gov/ecotox/>)

and the ECHA REACH database (<https://echa.europa.eu/information-on-chemicals/registered-substances>). The derived PNECs were then used in a preliminary risk assessment to prioritize contaminants of emerging organic pollutants (EOPs) for further monitoring.

**Text S4** Check chromatographic profiles to identify the retention time of the compound

Compound Discoverer™ 3.3 identified a major ion with  $m/z$  216.09998 at a retention time (RT) of 9.8 minutes (**Fig. S2**). This ion was detected in all sample files using triplicate injections analyzed in positive ion mode at the MS1-only level (**Fig. 1a**). The software also identified three corresponding  $^{13}\text{C}$  isotopic ions, highlighted by green boxes, which confirmed that their measured masses and intensities were within the expected range. In addition, Compound Discoverer™ 3.3 detected a sodium adduct ion ( $m/z$  238.07672) and a water neutral loss ion ( $m/z$  198.11952), both of which were likely formed during ionization. Detection of the neutral loss was predefined in the acquisition settings (**Fig. 1a**). Using the major ion ( $m/z$  216.09998), the software calculated the ion intensity across the chromatographic separation time for each submitted file analyzed in MS1-only mode. It then generated the corresponding chromatographic peak shape and determined the area under the curve (**Fig. S2**). The chromatogram showed clear baseline resolution, indicating distinct start and end points for the peak associated with this ion. Finally, within the specified tolerance limits in the **section 2.4** settings, Compound Discoverer™ 3.3 confirmed the presence of the  $m/z$  216.09998 ion at RT = 9.8 minutes in sample files (**Fig. 1a** and **S2**). Thus, only ions exhibiting well-defined chromatographic peak shapes were selected for subsequent identification at various confidence levels.

**Text S5** Check MS2 from ChemSpider and PubChem for profiles identified with a confidence level of 3

Compounds were assigned a confidence level of 3 when probable structures and molecular formulae could be determined.<sup>1,2</sup> However, these compounds did not show exact MS/MS matches in the mzCloud spectral library. To improve annotation, product ion matches involving two or more ions were examined in ChemSpider and PubChem.<sup>4</sup> The details of these profiles are provided below.

For tentative compound annotations with a confidence level of 3, we consulted MS2 spectral information from publicly accessible chemical databases to support structural elucidation. Compound identities were queried in ChemSpider, a chemically diverse resource hosting contributed and aggregated spectral data, including MS2 spectra when available. Spectra linked to candidate structures were carefully examined to compare experimental fragment patterns with reference data, bearing in mind the variability and limited standardization of spectra in this resource. In addition, the website will display related publications, and you can check any that contain MS2 data for comparison.<sup>5</sup>

Similarly, PubChem was used to retrieve MS2 spectra from curated spectral libraries integrated within its platform, such as those provided by the NIST Mass Spectrometry Data Center. MS2 spectral data for each candidate were accessed under the "Spectral Properties" section of the respective compound records. Key spectral parameters including ionization mode, collision energy, and fragment ion  $m/z$  values were considered to confirm or refine tentative identifications (<https://pubchem.ncbi.nlm.nih.gov/docs/spectral-information>). However, the intensity of product ions is not often the same as in our data, since the value of collision energy differs across measurements and experiments. This difference results in variations in product ion intensity.

Therefore, we compared only the m/z values of product ions. If at least two or more product ions match, the compound is classified as level 3.<sup>4</sup>

Although compounds assigned to confidence level 3 were identified based on probable structures and molecular formulas, they lacked confirmatory MS/MS fragment matches in the mzCloud spectral library. Therefore, these features were not included in the semi-quantification step, which focused on level 2 identifications with higher structural certainty. However, the presence of level 3 compounds still provides valuable qualitative information about potential contaminants in the studied rivers. Although their concentrations were not estimated, their detection suggests possible environmental exposure pathways. These compounds should be regarded as potential candidates for future targeted analysis once reference standards become available. Future work will include quantitative validation of these features to better assess their environmental risk.

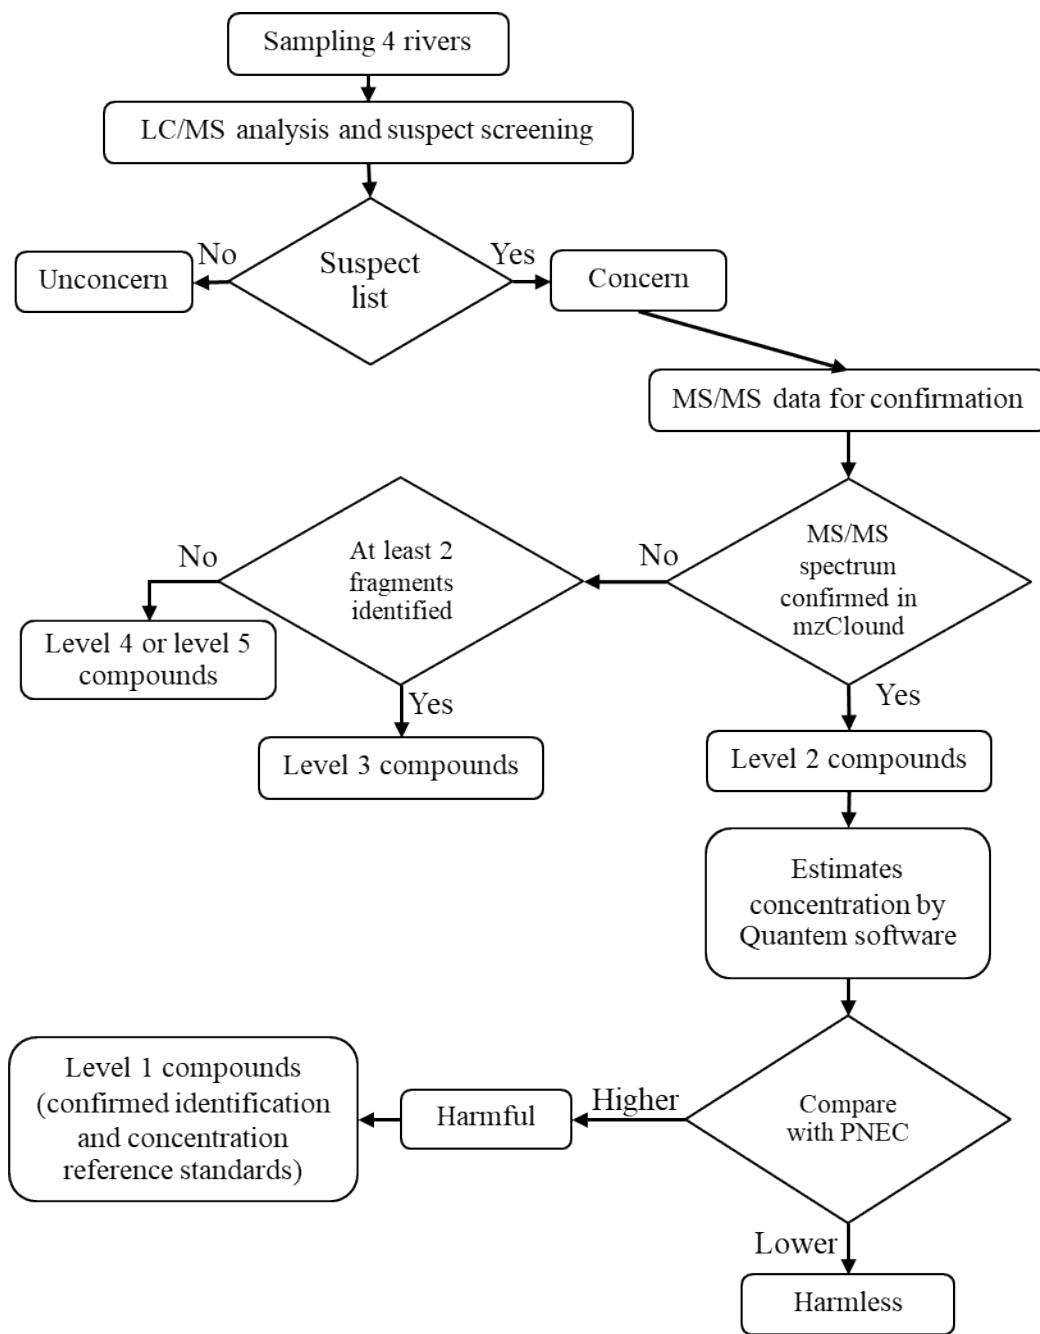

**Fig. S1.** Flowchart of the strategy and method used to select the EOP compounds found in positive and negative ionization modes

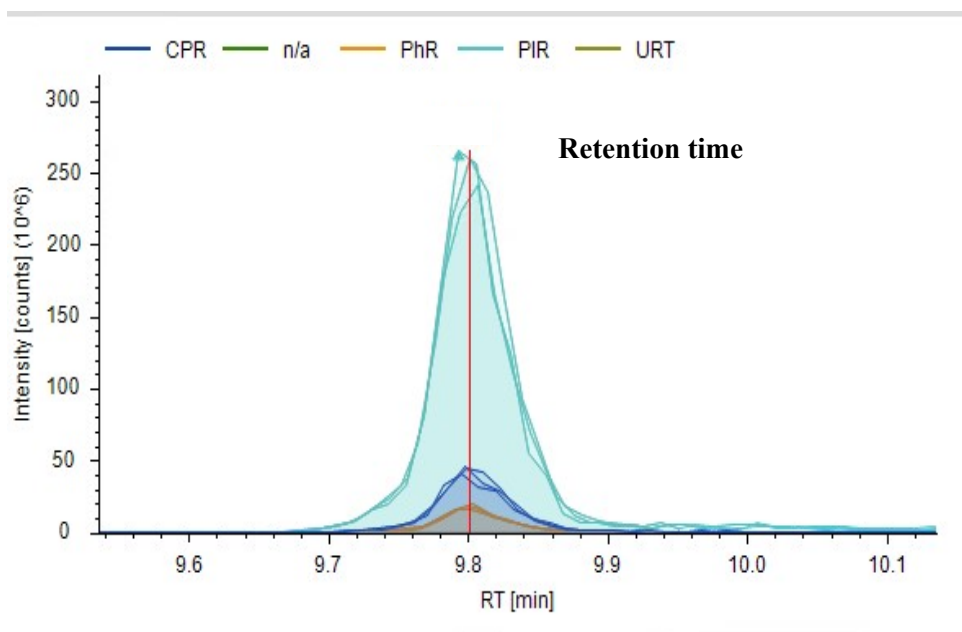

**Fig. S2** Chromatographic representation of the  $m/z$  216.09998 ion from all sample files

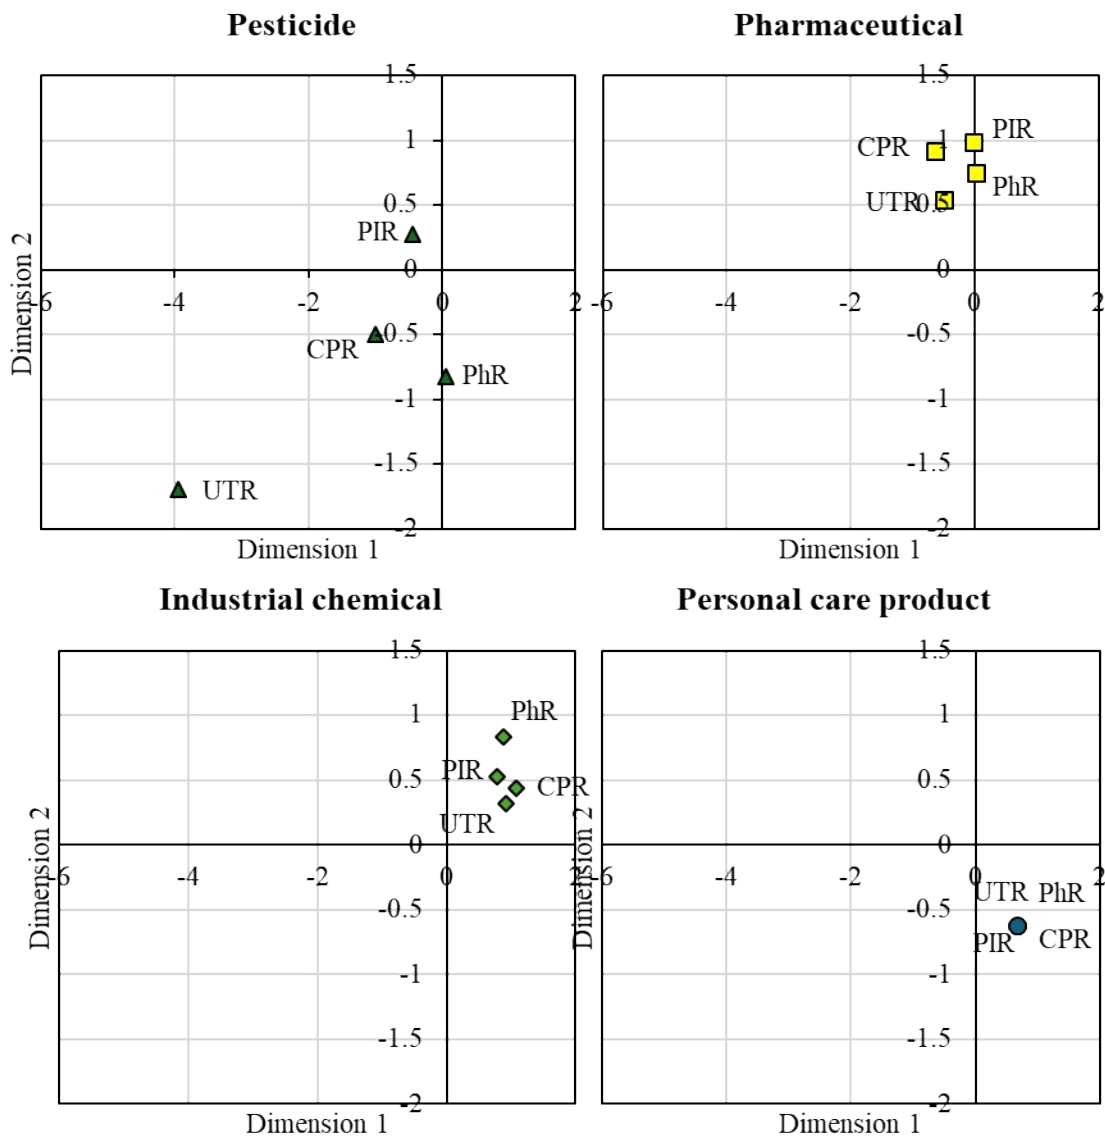

**Fig. S3.** Multidimensional scaling of EOPs features level 2 in each classification

### Classification of common level 2 EOPs

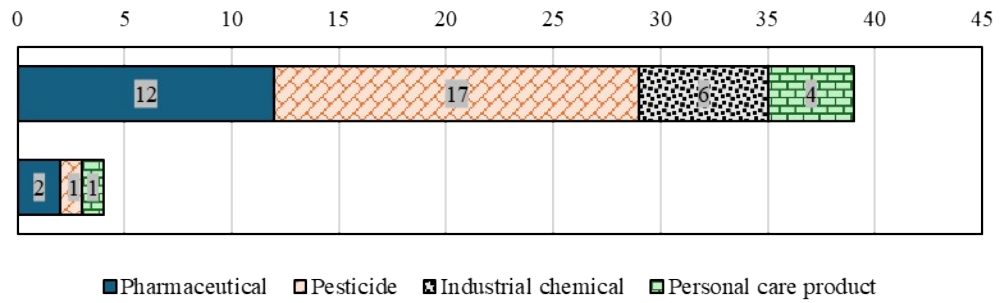

**Fig. S4** The classification of common level 2 EOPs identified with predicted no-effect concentrations (PNECs).



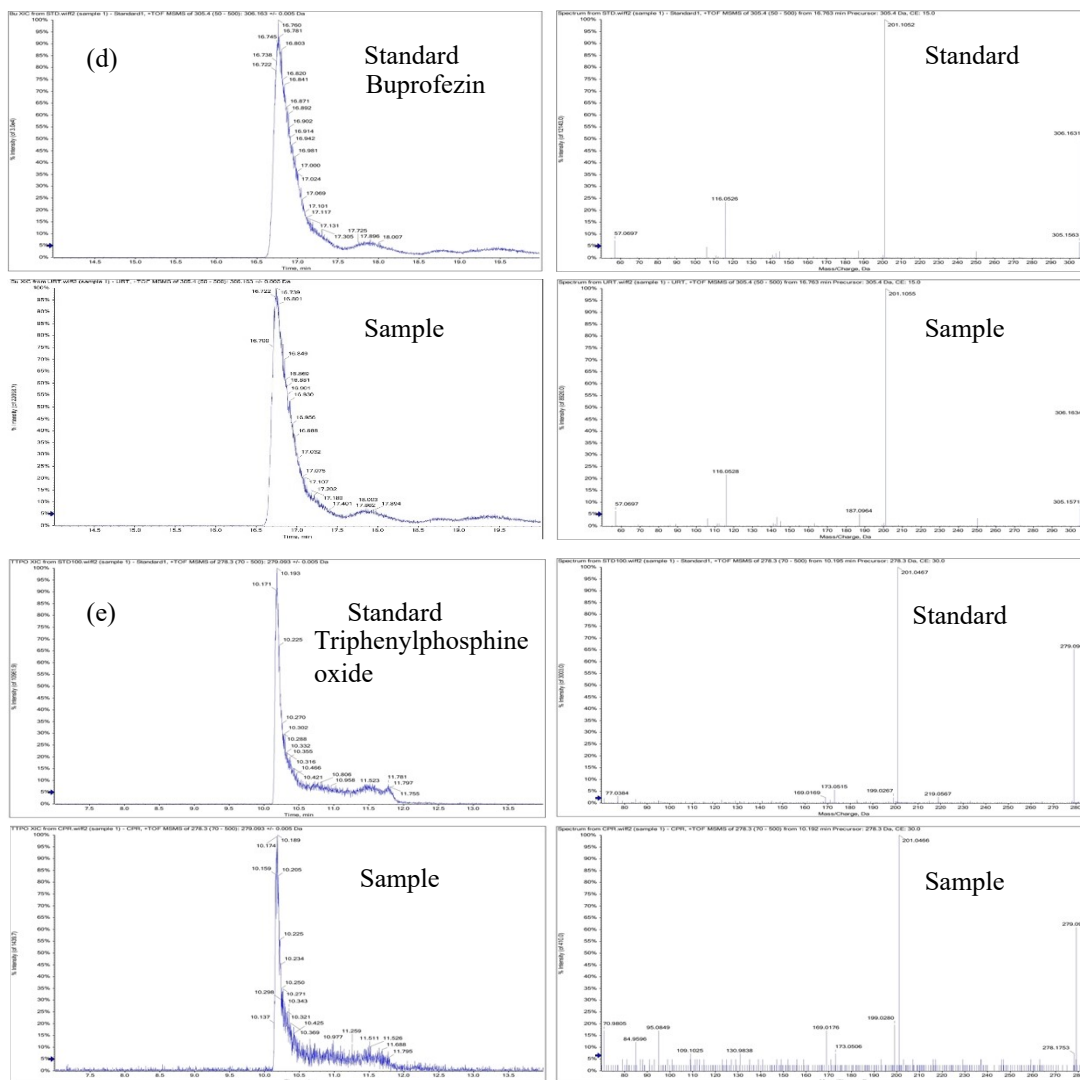

**Fig. S5** Extracted ion chromatograms (left) and MS/MS patterns (right) for the reference standards (top) and samples (bottom) of (a) 17 $\beta$ -estradiol (precursor ion m/z 273.1850, product ions m/z 272.1850, 213.1271, retention time 10.1 min), (b) 17 $\beta$ -trenbolone (precursor ion m/z 271.1694, product ions m/z 253.1290, 195.1010, retention time 7.4 min), (c) imidacloprid (precursor ion m/z 256.0602, product ions m/z 212.0590, 209.0593, retention time 10.8 min), (d) buprofezin (precursor ion m/z 306.1631, product ion m/z 201.1052, 116.0526, retention time 16.7 min), and (e) triphenylphosphine oxide (precursor ion m/z 279.0940, product ions m/z 201.0467, 173.0515, retention time 10.2 min).

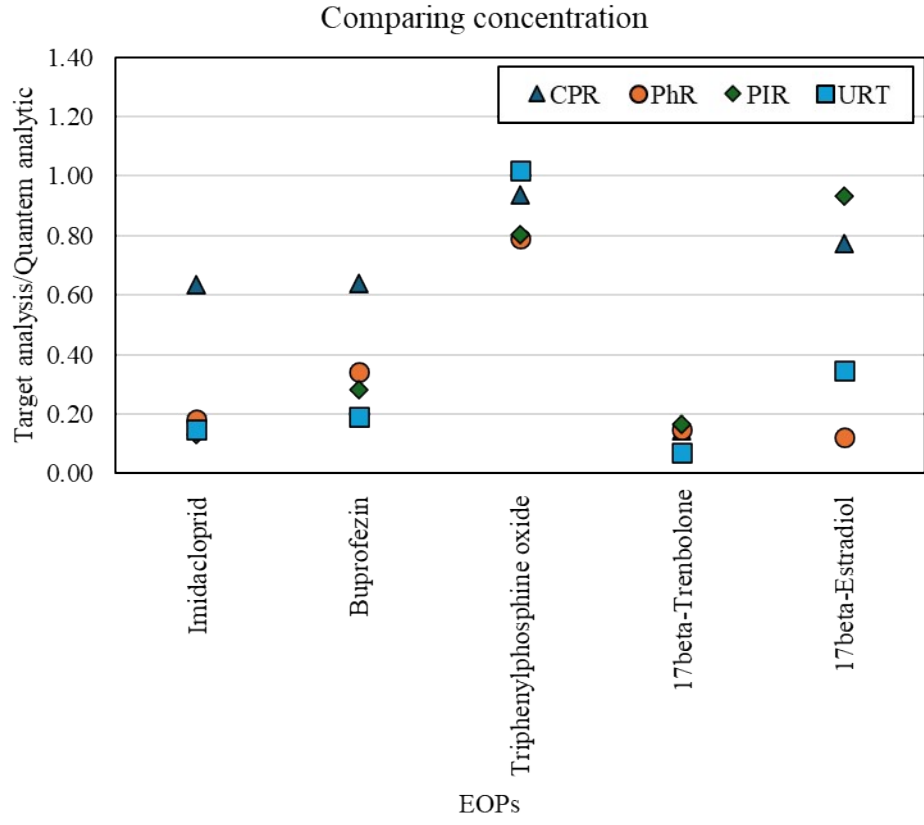

Target analysis/Quantem analytic > 1 : Quantem analytic underestimates  
 Target analysis/Quantem analytic =1 : Quantem accurate  
 Target analysis/Quantem analytic <1 : Quantem analytic overestimates

**Fig. S6** Comparison of concentrations from target analysis and Quantem estimations.

**Table S1** General parameters for each river

| River | Turbidity (NTU) | DOC (mg/L) | SUVA (L/mg·m) | pH   | DO (mg/L) | EC (µS/cm) |
|-------|-----------------|------------|---------------|------|-----------|------------|
| CPR   | 35.5            | 2.71       | 2.44          | 6.81 | 5.41      | 316        |
| PhR   | 10.7            | 5.27       | 1.42          | 6.70 | 6.50      | 189        |
| PIR   | 18.2            | 2.02       | 2.61          | 6.53 | 6.01      | 172        |
| UTR   | 58.9            | 2.54       | 1.97          | 6.80 | 4.83      | 202        |

| Sampling Location              | Province / Region     | Dominant Land Use Types             | Mean River Flow (m <sup>3</sup> /day) | Total WTP Discharge (m <sup>3</sup> /day) | Estimated Population in Catchment | Major Potential EOP Sources                                                                                                            |
|--------------------------------|-----------------------|-------------------------------------|---------------------------------------|-------------------------------------------|-----------------------------------|----------------------------------------------------------------------------------------------------------------------------------------|
| <b>Phong River (PhR)</b>       | Khon Kaen (Northeast) | Agricultural and peri-urban         | $3.2 \times 10^6 \pm 0.4 \times 10^6$ | $45,000 \pm 5,000$                        | ~250,000                          | Agricultural runoff, domestic wastewater, livestock farming, landfill leachate, and limited industrial discharge                       |
| <b>Chao Phraya River (CPR)</b> | Bangkok / Central     | Urban, industrial, and mixed-use    | $1.3 \times 10^6 \pm 1.0 \times 10^6$ | $120,000 \pm 20,000$                      | ~5,600,000                        | Domestic sewage, personal care products, pharmaceuticals, hospital effluents, and industrial discharges from the Chao Phraya watershed |
| <b>Ping River (PIR)</b>        | Chiang Mai (North)    | Agricultural, urban, and peri-urban | $4.0 \times 10^6 \pm 0.4 \times 10^6$ | $80,000 \pm 10,000$                       | ~200,000                          | Urban wastewater, household chemicals, tourism activities, veterinary drugs, and agricultural runoff                                   |
| <b>U-Tapao Canal (UTR)</b>     | Songkhla (South)      | Agricultural, urban, and industrial | $5.1 \times 10^6 \pm 0.2 \times 10^6$ | $30,000 \pm 4,000$                        | ~180,000                          | Industrial effluents, untreated domestic wastewater, and agricultural inputs                                                           |

\*River flow rate data from <https://www.thaiwater.net/water/dam/large>

\*Total WTP discharge = Population served × Water use per capita (L/day)/1000

\*\* Typical Thai urban water use: 200 L/person/day

\*Population approximates using provincial or district population densities multiplied by catchment area.

**Table S2** Surrogate and internal standards used in this study

| Name                               | Type              | Formula       | MW(g/mol) |
|------------------------------------|-------------------|---------------|-----------|
| <u>Positive</u>                    |                   |               |           |
| Methamidophos-d6                   | Internal standard | C2H2D6NO2PS   | 147.17    |
| Methomyl-d3                        | Internal standard | C5H7D3N2O2S   | 165.23    |
| Caebendazim-d4                     | Internal standard | C9H5D4N3O2    | 195.21    |
| Pirimicarb-d6                      | Internal standard | C11H12D6N4O2  | 244.32    |
| Imazail-d5                         | Internal standard | C14H9C12D5N2O | 302.21    |
| Etofenprox-d5                      | Internal standard | C25H23D5O3    | 381.52    |
| <u>Negative</u>                    |                   |               |           |
| 2-Ethylhexanoicacid                | Surrogate         | C8H16O2       | 144.24    |
| Decanoicacid                       | Surrogate         | C10H20O2      | 172.26    |
| 2,4-Dinitrophenol                  | Surrogate         | C6H4N2O5      | 184.106   |
| Diuron-D6                          | Internal standard | C9H4D6Cl2N2O  | 239.13    |
| Heptadecafluorooctanesulfonic Acid | Surrogate         | C8HF17O3S     | 500.13    |
| Hexabromocyclododecane             | Surrogate         | C12H18Br6     | 641.7     |

**Table S3** Parameters of HESI and Orbitrap MS used for acquiring MS/MS data

| <b>Parameter</b>             | <b>Description</b>                                                                                                                                                                                        | <b>Value in +<br/>mode</b>  | <b>Value in -<br/>mode</b>  |
|------------------------------|-----------------------------------------------------------------------------------------------------------------------------------------------------------------------------------------------------------|-----------------------------|-----------------------------|
| Spray voltage<br>(kV)        | The nozzle uses voltage to squirt liquid. Molecules are ionized using this voltage.                                                                                                                       | 4.00                        | 4.00                        |
| Sheath gas flow<br>rate (AU) | To aid in nebulizing the sample solution into a fine mist at the ESI nozzle's exit, the sheath gas flow rate (nitrogen) at the ESI source is carefully controlled.                                        | 40                          | 40                          |
| Sweep gas flow<br>rate       | The outer-coaxial gas (nitrogen) assists the sheath gas in dispersing the sample and facilitating solvent evaporation.                                                                                    | 0                           | 0                           |
| Capillary temp.<br>(°C)      | The temperature of the heated capillary in an ESI source. It helps to vaporize the solvent from the sample, facilitating the formation of ions for mass spectrometry analysis.                            | 350                         | 350                         |
| Aux gas heater<br>temp. (°C) | The temperature of the auxiliary gas used in the ESI process. It helps to further assist in solvent evaporation and ionization by providing additional heating to the sample as it exists the ESI source. | 300                         | 300                         |
| Injection time<br>(ms)       | Duration for ion injection from the C-trap to the mass analyzer.                                                                                                                                          | 50                          | 50                          |
| Microscan's (s)              | Number of micro scans per second.                                                                                                                                                                         | 1                           | 1                           |
| Automatic gain<br>control    | Quantity or number of ions per scan.                                                                                                                                                                      | Full MS : 1E6<br>MS/MS: 2E4 | Full MS : 1E6<br>MS/MS: 2E4 |

**Table S4** Details of suspect compounds used for full scan-ddMS2

| Number | Name               | m/z      | mode               | Category              | Number | Name                   | m/z      | mode               | Category              | Number | Name                                                     | m/z      | mode               | Category              | Number | Name                                                     | M/Z      | mode               | Category              |
|--------|--------------------|----------|--------------------|-----------------------|--------|------------------------|----------|--------------------|-----------------------|--------|----------------------------------------------------------|----------|--------------------|-----------------------|--------|----------------------------------------------------------|----------|--------------------|-----------------------|
| 1      | Sulpiride          | 342.1517 | [M+H] <sup>+</sup> | Pharmaceutical        | 36     | Triazophos             | 314.0729 | [M+H] <sup>+</sup> | Pesticide             | 72     | Cyromazine                                               | 167.1048 | [M+H] <sup>+</sup> | Pesticide             | 108    | Chlorpromazine                                           | 319.1039 | [M+H] <sup>+</sup> | Pharmaceutical        |
| 2      | 4-Acetamidopyridin | 246.1254 | [M+H] <sup>+</sup> | Pharmaceutical        | 37     | Spirotetramat          | 374.1967 | [M+H] <sup>+</sup> | Pesticide             | 73     | Cotinine                                                 | 177.1021 | [M+H] <sup>+</sup> | Natural product       | 109    | Metolachlor morpholinone                                 | 234.1511 | [M+H] <sup>+</sup> | Pesticide             |
| 3      | Caffeine           | 195.0881 | [M+H] <sup>+</sup> | Food additive         | 38     | Tetraconazole          | 372.0268 | [M+H] <sup>+</sup> | Pesticide             | 74     | Desnitro-imidacloprid                                    | 211.0746 | [M+H] <sup>+</sup> | Pesticide             | 110    | Pterosin B                                               | 219.1403 | [M+H] <sup>+</sup> | Natural product       |
| 3      | Thiamethoxam       | 292.0294 | [M+H] <sup>+</sup> | Pesticide             | 39     | Thifluzamide           | 526.8494 | [M+H] <sup>+</sup> | Pesticide             | 75     | Desnitro Thiamethoxam                                    | 247.041  | [M+H] <sup>+</sup> | Pesticide             | 111    | Azoxystrobin acid                                        | 390.1147 | [M+H] <sup>+</sup> | Pesticide             |
| 4      | Carbendazim        | 192.0764 | [M+H] <sup>+</sup> | Pesticide             | 40     | Metolachlor            | 284.1431 | [M+H] <sup>+</sup> | Pesticide             | 76     | 2-Aminobenzimidazole                                     | 134.0733 | [M+H] <sup>+</sup> | Natural product       | 112    | Deisopropylatrazine                                      | 174.0549 | [M+H] <sup>+</sup> | Pesticide             |
| 5      | Imidacloprid urea  | 212.0567 | [M+H] <sup>+</sup> | Pesticide             | 41     | Picoxystrobin          | 368.1109 | [M+H] <sup>+</sup> | Pesticide             | 77     | 2,3,4,9-Tetrahydro-6-methoxy-1H-pyrido(3,4-b)indol-1-one | 217.0976 | [M+H] <sup>+</sup> | Pharmaceutical        | 113    | 4-phenylbutenone                                         | 147.082  | [M+H] <sup>+</sup> | Food additive         |
| 6      | Thiabendazole      | 202.0447 | [M+H] <sup>+</sup> | Pesticide             | 42     | Flusilazole            | 316.1067 | [M+H] <sup>+</sup> | Pesticide             | 78     | 4-Antipyrinecarboxaldehyde                               | 217.0976 | [M+H] <sup>+</sup> | Pharmaceutical        | 114    | Curcumenol                                               | 235.1729 | [M+H] <sup>+</sup> | Pharmaceutical        |
| 7      | Imidacloprid       | 256.0586 | [M+H] <sup>+</sup> | Pesticide             | 43     | Loteprednol etabonate  | 467.1789 | [M+H] <sup>+</sup> | Pharmaceutical        | 79     | Norharman                                                | 169.0757 | [M+H] <sup>+</sup> | Natural product       | 115    | Brevilin A                                               | 347.1917 | [M+H] <sup>+</sup> | Natural product       |
| 8      | Antipyrin          | 189.1021 | [M+H] <sup>+</sup> | Pharmaceutical        | 44     | Chlormadinone acetate  | 405.1812 | [M+H] <sup>+</sup> | Pharmaceutical        | 80     | 5-Carboline                                              | 169.0757 | [M+H] <sup>+</sup> | Pharmaceutical        | 116    | Tomatidine                                               | 416.3521 | [M+H] <sup>+</sup> | Natural product       |
| 9      | Clothianidin       | 250.0181 | [M+H] <sup>+</sup> | Pesticide             | 45     | Benzovindiflupyr       | 398.0655 | [M+H] <sup>+</sup> | Pesticide             | 81     | 4-Aminobenzamide                                         | 137.0701 | [M+H] <sup>+</sup> | Industrial chemical   | 117    | Pteleine                                                 | 230.0833 | [M+H] <sup>+</sup> | Natural product       |
| 10     | Aldoxycarb         | 223.074  | [M+H] <sup>+</sup> | Pesticide             | 46     | Tebuconazole           | 308.1545 | [M+H] <sup>+</sup> | Pesticide             | 82     | 1,3-Diphenylguanidine                                    | 212.1162 | [M+H] <sup>+</sup> | Industrial chemical   | 118    | Curcumenol                                               | 237.1852 | [M+H] <sup>+</sup> | Natural product       |
| 11     | 2-Naphthylamine    | 144.0802 | [M+H] <sup>+</sup> | Industrial chemical   | 47     | Penconazole            | 284.0741 | [M+H] <sup>+</sup> | Pesticide             | 83     | Harman                                                   | 183.093  | [M+H] <sup>+</sup> | Pharmaceutical        | 119    | osthenol                                                 | 231.1023 | [M+H] <sup>+</sup> | Natural product       |
| 12     | Tricyclazole       | 190.043  | [M+H] <sup>+</sup> | Pesticide             | 48     | Progesterone           | 315.2321 | [M+H] <sup>+</sup> | Pharmaceutical        | 84     | Amantadine                                               | 152.1446 | [M+H] <sup>+</sup> | Pharmaceutical        | 120    | Kotanin                                                  | 439.1411 | [M+H] <sup>+</sup> | Pharmaceutical        |
| 13     | Monuron            | 199.0657 | [M+H] <sup>+</sup> | Pesticide             | 49     | Mefenitruconazole      | 398.09   | [M+H] <sup>+</sup> | Pesticide             | 85     | Isophorone                                               | 139.1138 | [M+H] <sup>+</sup> | Industrial chemical   | 121    | N,N-Dimethyltetradecylamine                              | 242.2854 | [M+H] <sup>+</sup> | Industrial chemical   |
| 14     | Phenolphthalein    | 319.0966 | [M+H] <sup>+</sup> | Industrial chemical   | 50     | Pyraclostrobin         | 388.1048 | [M+H] <sup>+</sup> | Pesticide             | 86     | 2-Quinolol                                               | 146.059  | [M+H] <sup>+</sup> | Natural product       | 122    | Metolachlor OA                                           | 280.1565 | [M+H] <sup>+</sup> | Pesticide             |
| 15     | Etoricoxib         | 359.0662 | [M+H] <sup>+</sup> | Pharmaceutical        | 51     | Prochloraz             | 376.0394 | [M+H] <sup>+</sup> | Pesticide             | 87     | 3-Methylfoxindole                                        | 148.0762 | [M+H] <sup>+</sup> | Natural product       | 123    | Chromone                                                 | 243.1169 | [M+H] <sup>+</sup> | Pharmaceutical        |
| 16     | Mesulfenfos        | 295.0229 | [M+H] <sup>+</sup> | Pesticide             | 52     | (+/-)-Indoxacarb       | 528.0805 | [M+H] <sup>+</sup> | Pesticide             | 88     | Valgargin                                                | 265.1444 | [M+H] <sup>+</sup> | Pharmaceutical        | 124    | Climbazole                                               | 293.1037 | [M+H] <sup>+</sup> | Personal care product |
| 17     | Phorate sulfone    | 293.0092 | [M+H] <sup>+</sup> | Pesticide             | 53     | Lopinavir              | 629.3714 | [M+H] <sup>+</sup> | Pharmaceutical        | 89     | Reynosin                                                 | 249.1486 | [M+H] <sup>+</sup> | Natural product       | 125    | Triphenylphosphine oxide                                 | 279.0925 | [M+H] <sup>+</sup> | Industrial chemical   |
| 18     | Atrazine           | 216.1009 | [M+H] <sup>+</sup> | Pesticide             | 54     | Benzyl butyl phthalate | 313.1454 | [M+H] <sup>+</sup> | Industrial chemical   | 90     | Albendazole sulfone                                      | 298.0917 | [M+H] <sup>+</sup> | Pharmaceutical        | 126    | 3-(4-hydroxy-5-oxo-3-phenyl-2H-furan-2-yl)propanoic acid | 249.0776 | [M+H] <sup>+</sup> | Pharmaceutical        |
| 19     | Metalaxyl          | 280.1531 | [M+H] <sup>+</sup> | Pesticide             | 55     | Tributyl phosphate     | 267.1739 | [M+H] <sup>+</sup> | Industrial chemical   | 91     | Tryptophol                                               | 162.0914 | [M+H] <sup>+</sup> | Natural product       | 127    | N,N-Dimethyldodecan-1-amine                              | 214.2522 | [M+H] <sup>+</sup> | Industrial chemical   |
| 20     | Buturon            | 237.0781 | [M+H] <sup>+</sup> | Pesticide             | 56     | Methylparaben          | 153.0545 | [M+H] <sup>+</sup> | Food additive         | 92     | 1-(4-Methoxyphenyl)pent-1-en-3-one                       | 191.105  | [M+H] <sup>+</sup> | Food additive         | 128    | Traversianal                                             | 317.2099 | [M+H] <sup>+</sup> | Pesticide             |
| 21     | Diuron             | 233.0254 | [M+H] <sup>+</sup> | Pesticide             | 57     | Metaflumizone          | 507.121  | [M+H] <sup>+</sup> | Pesticide             | 93     | 3,4-Dimethoxycinnamic acid                               | 209.0818 | [M+H] <sup>+</sup> | Food additive         | 129    | N,N-Dimethyldodecylamine-N-oxide                         | 230.2478 | [M+H] <sup>+</sup> | Industrial chemical   |
| 22     | Flumorph           | 372.1613 | [M+H] <sup>+</sup> | Pesticide             | 58     | 17beta-Estradiol       | 273.1869 | [M+H] <sup>+</sup> | Pharmaceutical        | 94     | Triethyl phosphate (TEP)                                 | 183.0764 | [M+H] <sup>+</sup> | Industrial chemical   | 130    | Terbutylazine                                            | 230.1174 | [M+H] <sup>+</sup> | Pesticide             |
| 23     | Fipronil sulfone   | 452.9379 | [M+H] <sup>+</sup> | Pesticide             | 59     | Lufenuron              | 510.9894 | [M+H] <sup>+</sup> | Pesticide             | 95     | laminostilbene                                           | 194.0977 | [M+H] <sup>+</sup> | Pharmaceutical        | 131    | Telmisartan                                              | 515.2439 | [M+H] <sup>+</sup> | Pharmaceutical        |
| 24     | Chlorantranilprole | 481.9798 | [M+H] <sup>+</sup> | Pesticide             | 60     | Tolfenpyrad            | 384.1487 | [M+H] <sup>+</sup> | Pesticide             | 96     | N-[2-(2,4,6-trichlorophenoxy)ethyl]propylamine           | 282.0226 | [M+H] <sup>+</sup> | Pesticide             | 132    | 3,4-Dihydrocoumarin                                      | 149.0613 | [M+H] <sup>+</sup> | Food additive         |
| 25     | Ametryn            | 228.1291 | [M+H] <sup>+</sup> | Pesticide             | 61     | Butachlor              | 312.1722 | [M+H] <sup>+</sup> | Pesticide             | 97     | Thymol                                                   | 151.1116 | [M+H] <sup>+</sup> | Personal care product | 133    | Dimethomorph isomer 1                                    | 388.1289 | [M+H] <sup>+</sup> | Pesticide             |
| 26     | Albendazole        | 266.0948 | [M+H] <sup>+</sup> | Pharmaceutical        | 62     | Chlorpyrifos           | 349.9344 | [M+H] <sup>+</sup> | Pesticide             | 98     | d-Carvon                                                 | 151.1142 | [M+H] <sup>+</sup> | Natural product       | 134    | 4-Methylbenzylidene camphor                              | 255.1753 | [M+H] <sup>+</sup> | Personal care product |
| 27     | Azoxystrobin       | 404.1234 | [M+H] <sup>+</sup> | Pesticide             | 63     | Pendimethalin          | 282.1428 | [M+H] <sup>+</sup> | Pesticide             | 99     | Gabapentin                                               | 172.1329 | [M+H] <sup>+</sup> | Pharmaceutical        | 135    | [6]-Gingerol                                             | 295.1916 | [M+H] <sup>+</sup> | Natural product       |
| 28     | Pyrimethanil       | 200.1183 | [M+H] <sup>+</sup> | Pesticide             | 64     | Dicyclohexyl phthalate | 331.1933 | [M+H] <sup>+</sup> | Industrial chemical   | 100    | Eleuthero                                                | 245.0833 | [M+H] <sup>+</sup> | Pesticide             | 136    | Tetradecyl sulfate                                       | 293.18   | [M+H] <sup>+</sup> | Industrial chemical   |
| 29     | Boscalid           | 343.0411 | [M+H] <sup>+</sup> | Pesticide             | 65     | Chlorfluazuron         | 539.9715 | [M+H] <sup>+</sup> | Pesticide             | 101    | Dexibuprofen                                             | 207.1397 | [M+H] <sup>+</sup> | Pharmaceutical        | 137    | Phebalosin                                               | 259.0959 | [M+H] <sup>+</sup> | Pharmaceutical        |
| 30     | Benzylparaben      | 229.0881 | [M+H] <sup>+</sup> | Personal care product | 66     | Estradiol benzoate     | 377.211  | [M+H] <sup>+</sup> | Pharmaceutical        | 102    | Tris(2-chloroethyl) phosphate (TCEP)                     | 284.961  | [M+H] <sup>+</sup> | Industrial chemical   | 138    | Suberosin                                                | 245.1185 | [M+H] <sup>+</sup> | Natural product       |
| 31     | Diazepam           | 285.0819 | [M+H] <sup>+</sup> | Pharmaceutical        | 67     | Pyridaben              | 365.1453 | [M+H] <sup>+</sup> | Pesticide             | 103    | 2-Methoxycinnamaldelyde;                                 | 163.0749 | [M+H] <sup>+</sup> | Food additive         | 139    | Osthole                                                  | 245.1185 | [M+H] <sup>+</sup> | Natural product       |
| 32     | Paclotrazol        | 294.138  | [M+H] <sup>+</sup> | Pesticide             | 68     | 4-Aminobenzoic acid    | 138.054  | [M+H] <sup>+</sup> | Personal care product | 104    | Isopimpinellin                                           | 247.0635 | [M+H] <sup>+</sup> | Pesticide             | 140    | Irbesartan                                               | 427.2213 | [M+H] <sup>+</sup> | Pharmaceutical        |
| 33     | Methoxyfenozide    | 369.2187 | [M+H] <sup>+</sup> | Pesticide             | 69     | Metformin              | 130.1088 | [M+H] <sup>+</sup> | Pharmaceutical        | 105    | Ethyl butylacetylaminopropionate                         | 216.1611 | [M+H] <sup>+</sup> | Personal care product | 141    | Fipronil                                                 | 434.9294 | [M+H] <sup>+</sup> | Pesticide             |
| 34     | Fluopicolide       | 382.9706 | [M+H] <sup>+</sup> | Pesticide             | 70     | Triisopropanolamine    | 192.1614 | [M+H] <sup>+</sup> | Industrial chemical   | 106    | Hexa(methoxymethyl)melamine                              | 391.2308 | [M+H] <sup>+</sup> | Industrial chemical   | 142    | 1-Tetradecanamine                                        | 258.2798 | [M+H] <sup>+</sup> | Industrial chemical   |
| 35     | Prometryn          | 242.1453 | [M+H] <sup>+</sup> | Pesticide             | 71     | Nicotine               | 163.1219 | [M+H] <sup>+</sup> | Pharmaceutical        | 107    | 1-(2,4-Dichlorophenyl)-2-(1,2,4-triazol-1-yl)ethanol     | 258.0234 | [M+H] <sup>+</sup> | Pesticides            | 143    | Tebufenozide                                             | 351.2079 | [M+H] <sup>+</sup> | Pesticide             |



| Number | Name                                                | M/Z      | mode               | Category              | Number | Name                                                                       | M/Z      | mode               | Category              | Number | Name                                 | M/Z      | mode               | Category            | Number | Name                                      | M/Z      | mode               | Category              |
|--------|-----------------------------------------------------|----------|--------------------|-----------------------|--------|----------------------------------------------------------------------------|----------|--------------------|-----------------------|--------|--------------------------------------|----------|--------------------|---------------------|--------|-------------------------------------------|----------|--------------------|-----------------------|
| 144    | Fipronil sulfide                                    | 418.9363 | [M+H] <sup>+</sup> | Pesticide             | 187    | Edifenphos                                                                 | 311.0345 | [M+H] <sup>+</sup> | Pesticide             | 230    | 5-Hydroxydamantane-2-one             | 167.1075 | [M+H] <sup>+</sup> | Industrial chemical | 273    | 5,6-Benzo flavone                         | 273.0888 | [M+H] <sup>+</sup> | Industrial chemical   |
| 145    | Pterostilbene                                       | 257.1204 | [M+H] <sup>+</sup> | Natural product       | 188    | Kaempferol                                                                 | 287.0544 | [M+H] <sup>+</sup> | Pharmaceutical        | 231    | Fenarol                              | 165.1034 | [M+H] <sup>+</sup> | Pesticide           | 274    | BENZYLDIIPHENYLPHOSPHINE OXIDE            | 293.1107 | [M+H] <sup>+</sup> | Industrial chemical   |
| 146    | Costunolide                                         | 233.1535 | [M+H] <sup>+</sup> | Pharmaceutical        | 189    | Glafefine                                                                  | 373.0974 | [M+H] <sup>+</sup> | Pharmaceutical        | 232    | Terbutylazine-2-Hydroxy              | 212.152  | [M+H] <sup>+</sup> | Pesticide           | 275    | Normeperidine                             | 234.1511 | [M+H] <sup>+</sup> | Pharmaceutical        |
| 147    | 5-Phenylvaleric acid                                | 179.1062 | [M+H] <sup>+</sup> | Natural product       | 190    | Galaloid                                                                   | 259.2046 | [M+H] <sup>+</sup> | Personal care product | 233    | Alibamide                            | 252.1254 | [M+H] <sup>+</sup> | Pharmaceutical      | 276    | Xanthone                                  | 197.0592 | [M+H] <sup>+</sup> | Natural product       |
| 148    | Emamectin B1A                                       | 886.5359 | [M+H] <sup>+</sup> | Pesticide             | 191    | Gitoxin                                                                    | 781.4387 | [M+H] <sup>+</sup> | Pharmaceutical        | 234    | Cinnamide                            | 148.0787 | [M+H] <sup>+</sup> | Food additive       | 277    | cis-Resveratrol                           | 229.0912 | [M+H] <sup>+</sup> | Natural product       |
| 149    | Ritonavir                                           | 721.3237 | [M+H] <sup>+</sup> | Pharmaceutical        | 192    | Methylprednisolone                                                         | 375.2186 | [M+H] <sup>+</sup> | Pharmaceutical        | 235    | 8-Hydroxyquinolin                    | 146.059  | [M+H] <sup>+</sup> | Industrial chemical | 278    | Dicyclohexylurea                          | 225.1998 | [M+H] <sup>+</sup> | Industrial chemical   |
| 150    | Lamotrigine                                         | 256.016  | [M+H] <sup>+</sup> | Pharmaceutical        | 193    | Stigmastadienone                                                           | 411.3658 | [M+H] <sup>+</sup> | Pharmaceutical        | 236    | Quinoline-N-oxide                    | 146.059  | [M+H] <sup>+</sup> | Industrial chemical | 279    | N-methyldodecylamine                      | 200.237  | [M+H] <sup>+</sup> | Personal care product |
| 151    | Propiconazole                                       | 342.0755 | [M+H] <sup>+</sup> | Pesticide             | 194    | Butenafine                                                                 | 318.2237 | [M+H] <sup>+</sup> | Pharmaceutical        | 237    | Pteroin G                            | 235.1321 | [M+H] <sup>+</sup> | Natural product     | 280    | 5,6,7-Trimethoxycoumarin                  | 237.0781 | [M+H] <sup>+</sup> | Pharmaceutical        |
| 152    | Costunolide                                         | 233.1566 | [M+H] <sup>+</sup> | Natural product       | 195    | Quercitrin                                                                 | 449.1229 | [M+H] <sup>+</sup> | Natural product       | 238    | Tetra(methoxymethyl)melamine (TMMM)  | 303.1753 | [M+H] <sup>+</sup> | Industrial chemical | 281    | Tris(2-chloroisopropyl)phosphate (TCPP)   | 327.0666 | [M+H] <sup>+</sup> | Industrial chemical   |
| 153    | Hydroxycinnamic acid                                | 165.0535 | [M+H] <sup>+</sup> | Pharmaceutical        | 196    | Oxiglutatione                                                              | 613.1649 | [M+H] <sup>+</sup> | Pharmaceutical        | 239    | Benzo[g]quinoline                    | 180.0796 | [M+H] <sup>+</sup> | Industrial chemical | 282    | 1,2-Chrysenedione                         | 259.0795 | [M+H] <sup>+</sup> | Industrial chemical   |
| 154    | 3-Hydroxycinnamic Acid                              | 165.0561 | [M+H] <sup>+</sup> | Natural product       | 197    | Nicotiflorin                                                               | 595.1616 | [M+H] <sup>+</sup> | Natural product       | 240    | (E)-3-(4-Hydroxyphenyl)acrylaldehyde | 149.0588 | [M+H] <sup>+</sup> | Natural product     | 283    | Isoprothiolane                            | 291.0721 | [M+H] <sup>+</sup> | Pesticide             |
| 155    | Methyl 2,4-Dihydroxy-3,6-Dimethylbenzoate           | 197.0822 | [M+H] <sup>+</sup> | Personal care product | 198    | Furosemide                                                                 | 331.0146 | [M+H] <sup>+</sup> | Pharmaceutical        | 241    | N-Acetyltryptamine                   | 203.1164 | [M+H] <sup>+</sup> | Pharmaceutical      | 284    | 4-Methylcinnamic Acid                     | 163.0749 | [M+H] <sup>+</sup> | Personal care product |
| 156    | Eplereone                                           | 415.209  | [M+H] <sup>+</sup> | Pharmaceutical        | 199    | cis-3-(2,5-Dimethylphenyl)-4-hydroxy-8-methoxy-1-azaspiro[4.5]decane-2-one | 304.195  | [M+H] <sup>+</sup> | Pesticide             | 242    | Benothiazole-2-sulfonic acid         | 213.9638 | [M+H] <sup>+</sup> | Industrial chemical | 285    | 7-Methoxy-4-methylcoumarin                | 191.071  | [M+H] <sup>+</sup> | Natural product       |
| 157    | Pyroquon                                            | 174.0927 | [M+H] <sup>+</sup> | Pesticide             | 200    | Lupatine                                                                   | 170.1522 | [M+H] <sup>+</sup> | Pharmaceutical        | 243    | 1-HYDROXYPHENAZINE                   | 197.0735 | [M+H] <sup>+</sup> | Natural product     | 286    | Reynoutrin                                | 435.0902 | [M+H] <sup>+</sup> | Natural product       |
| 158    | Norethynodrel                                       | 299.202  | [M+H] <sup>+</sup> | Pharmaceutical        | 201    | Tolnafate                                                                  | 308.115  | [M+H] <sup>+</sup> | Pesticide             | 244    | Ethirimol                            | 210.16   | [M+H] <sup>+</sup> | Pesticide           | 287    | Allylescaline                             | 238.1409 | [M+H] <sup>+</sup> | Pharmaceutical        |
| 159    | Betaxolol                                           | 308.2263 | [M+H] <sup>+</sup> | Pharmaceutical        | 202    | L-Glutamic acid                                                            | 313.0693 | [M+H] <sup>+</sup> | Food additive         | 245    | 6-Methylcoumarin                     | 161.0615 | [M+H] <sup>+</sup> | Natural product     | 288    | Nandrolone                                | 275.2027 | [M+H] <sup>+</sup> | Pharmaceutical        |
| 160    | Urea, N-propyl-N-[2-(2,4,6-trichlorophenoxy)ethyl]- | 325.0265 | [M+H] <sup>+</sup> | Pesticide             | 203    | Solasodine                                                                 | 414.3298 | [M+H] <sup>+</sup> | Natural product       | 246    | 6-Methoxyquinoline                   | 160.0763 | [M+H] <sup>+</sup> | Industrial chemical | 289    | 4'-Methyl-alpha-pyrrolidino propiophenone | 218.154  | [M+H] <sup>+</sup> | Pharmaceutical        |
| 161    | Difenoconazole                                      | 406.0713 | [M+H] <sup>+</sup> | Pesticide             | 204    | Lithocholic acid                                                           | 377.3062 | [M+H] <sup>+</sup> | Pharmaceutical        | 247    | Indole-3-acetic acid                 | 176.0689 | [M+H] <sup>+</sup> | Natural product     | 290    | Fipronil-desulfinyl                       | 386.9621 | [M+H] <sup>+</sup> | Pesticide             |
| 162    | 2-Methoxybenzoic acid                               | 153.0545 | [M+H] <sup>+</sup> | Pesticide             | 205    | Permethrin                                                                 | 391.0851 | [M+H] <sup>+</sup> | Pesticide             | 248    | Phentermine                          | 150.1298 | [M+H] <sup>+</sup> | Pharmaceutical      | 291    | BENZO(C)ACRIDINE                          | 230.0988 | [M+H] <sup>+</sup> | Industrial chemical   |
| 163    | Aspirin                                             | 181.0501 | [M+H] <sup>+</sup> | Pharmaceutical        | 206    | Bis-(2-ethylhexyl) phthalate                                               | 391.2834 | [M+H] <sup>+</sup> | Industrial chemical   | 249    | 4-Isopropylbenzyl alcohol            | 151.1116 | [M+H] <sup>+</sup> | Food additive       | 292    | Penbotolol                                | 292.2287 | [M+H] <sup>+</sup> | Pharmaceutical        |
| 164    | Dimethyl phthalate                                  | 195.0652 | [M+H] <sup>+</sup> | Industrial chemical   | 207    | 4-Methylphthalic anhydride                                                 | 163.0383 | [M+H] <sup>+</sup> | Pharmaceutical        | 250    | Dihydroxytyrosin                     | 277.1067 | [M+H] <sup>+</sup> | Pharmaceutical      | 293    | cinnamaldehyde                            | 133.066  | [M+H] <sup>+</sup> | Food additive         |
| 165    | Diethyl phthalate                                   | 223.0984 | [M+H] <sup>+</sup> | Personal care product | 208    | Glycerol 1-monostearate                                                    | 359.316  | [M+H] <sup>+</sup> | Food additive         | 251    | Indoline                             | 120.0809 | [M+H] <sup>+</sup> | Pharmaceutical      | 294    | BISPHENOL A (2,3-DIHYDROXYPROPYL) GLYCID  | 359.1841 | [M+H] <sup>+</sup> | Industrial chemical   |
| 166    | 4-Dodecylbenzenesulfonic acid                       | 325.1831 | [M+H] <sup>+</sup> | Industrial chemical   | 209    | Deoxycholic acid                                                           | 393.3055 | [M+H] <sup>+</sup> | Natural product       | 252    | Mexacarbate                          | 223.1473 | [M+H] <sup>+</sup> | Pesticide           | 295    | Tutin                                     | 295.1178 | [M+H] <sup>+</sup> | Natural product       |
| 167    | Cryptotanshinone                                    | 297.1493 | [M+H] <sup>+</sup> | Natural product       | 210    | Dodecylmorph                                                               | 282.2803 | [M+H] <sup>+</sup> | Pesticide             | 253    | Hexazinone                           | 253.166  | [M+H] <sup>+</sup> | Pesticide           | 296    | Shogaol                                   | 277.1816 | [M+H] <sup>+</sup> | Natural product       |
| 168    | Galaxolidone                                        | 273.1869 | [M+H] <sup>+</sup> | Personal care product | 211    | Erucamide                                                                  | 338.3433 | [M+H] <sup>+</sup> | Industrial chemical   | 254    | Pyracarbolid                         | 218.1162 | [M+H] <sup>+</sup> | Pesticide           | 297    | Butylparaben                              | 193.0857 | [M+H] <sup>+</sup> | Personal care product |
| 169    | Phenmedipham                                        | 301.1161 | [M+H] <sup>+</sup> | Pesticide             | 212    | Diethanolamine                                                             | 106.0889 | [M+H] <sup>+</sup> | Personal care product | 255    | Dimethyl telluride                   | 256.0062 | [M+H] <sup>+</sup> | Industrial chemical | 298    | Cyprodinil                                | 226.1341 | [M+H] <sup>+</sup> | Pesticide             |
| 170    | Androstenedione                                     | 287.2035 | [M+H] <sup>+</sup> | Pharmaceutical        | 213    | Maltose                                                                    | 341.108  | [M+H] <sup>+</sup> | Food additive         | 256    | Alantolactone                        | 233.1535 | [M+H] <sup>+</sup> | Natural product     | 299    | 17beta-Trenbolone                         | 271.1684 | [M+H] <sup>+</sup> | Pharmaceutical        |
| 171    | dextrorphan                                         | 258.191  | [M+H] <sup>+</sup> | Pharmaceutical        | 214    | Bufexamac                                                                  | 224.1264 | [M+H] <sup>+</sup> | Pharmaceutical        | 257    | 9,10-Phenanthredione                 | 209.0581 | [M+H] <sup>+</sup> | Pesticide           | 300    | 5,7-Dimethoxycoumarin                     | 207.0661 | [M+H] <sup>+</sup> | Pharmaceutical        |
| 172    | Crotamiton                                          | 204.1382 | [M+H] <sup>+</sup> | Pharmaceutical        | 215    | 4-Guadinobutyric acid                                                      | 146.0936 | [M+H] <sup>+</sup> | Natural product       | 258    | Buphedrone                           | 178.1219 | [M+H] <sup>+</sup> | Pharmaceutical      | 301    | Norketamine                               | 224.0866 | [M+H] <sup>+</sup> | Pharmaceutical        |
| 173    | Isopregnanolone                                     | 319.2648 | [M+H] <sup>+</sup> | Pharmaceutical        | 216    | Matrine                                                                    | 249.1971 | [M+H] <sup>+</sup> | Pharmaceutical        | 259    | Fention sulfone                      | 311.0237 | [M+H] <sup>+</sup> | Pesticide           | 302    | 2-Methylindole                            | 132.0813 | [M+H] <sup>+</sup> | Natural product       |
| 174    | Dibutyl phthalate                                   | 277.1433 | [M+H] <sup>+</sup> | Industrial chemical   | 217    | Myosmine                                                                   | 147.0919 | [M+H] <sup>+</sup> | Natural product       | 260    | Nalphenone                           | 163.1115 | [M+H] <sup>+</sup> | Natural product     | 303    | Nalmeferne                                | 340.1974 | [M+H] <sup>+</sup> | Pharmaceutical        |
| 175    | Mianserin N-oxide                                   | 279.1515 | [M+H] <sup>+</sup> | Pharmaceutical        | 218    | Methacarbonyl                                                              | 164.1086 | [M+H] <sup>+</sup> | Pharmaceutical        | 261    | Olivetol                             | 181.1245 | [M+H] <sup>+</sup> | Natural product     | 304    | Rhein                                     | 285.0474 | [M+H] <sup>+</sup> | Natural product       |
| 176    | Niclosamide                                         | 324.9763 | [M+H] <sup>+</sup> | Pesticide             | 219    | Levosulpiride                                                              | 342.1474 | [M+H] <sup>+</sup> | Pharmaceutical        | 262    | N,N-Dimethyldecylamine oxide         | 202.2163 | [M+H] <sup>+</sup> | Industrial chemical | 305    | Mandrestrobin                             | 314.1708 | [M+H] <sup>+</sup> | Pesticide             |
| 177    | Tanshinone II                                       | 295.1354 | [M+H] <sup>+</sup> | Natural product       | 220    | 2,3,4,9-tetrahydro-1H-pyrido[3,4-b]indol-1-one                             | 187.0846 | [M+H] <sup>+</sup> | Natural product       | 263    | 9-Fluorenone                         | 181.0666 | [M+H] <sup>+</sup> | Industrial chemical | 306    | Endosulfan sulfate                        | 418.8022 | [M+H] <sup>+</sup> | Pesticide             |
| 178    | Epinastine                                          | 250.1346 | [M+H] <sup>+</sup> | Pharmaceutical        | 221    | Decyldimethylamine                                                         | 186.2236 | [M+H] <sup>+</sup> | Industrial chemical   | 264    | Bisphenol A                          | 229.1222 | [M+H] <sup>+</sup> | Industrial chemical | 307    | Formetate                                 | 222.1216 | [M+H] <sup>+</sup> | Pesticide             |
| 179    | Meglutol                                            | 163.0618 | [M+H] <sup>+</sup> | Pharmaceutical        | 222    | Gabapentin-lactam                                                          | 154.1219 | [M+H] <sup>+</sup> | Pharmaceutical        | 265    | Naphthalene-2-sulfonic acid          | 207.012  | [M+H] <sup>+</sup> | Industrial chemical | 308    | Acrylic acid                              | 331.1896 | [M+H] <sup>+</sup> | Industrial chemical   |
| 180    | Quinalphos                                          | 299.0675 | [M+H] <sup>+</sup> | Pesticide             | 223    | Varenicline                                                                | 212.1192 | [M+H] <sup>+</sup> | Pharmaceutical        | 266    | N-Demethoxyluron                     | 216.9938 | [M+H] <sup>+</sup> | Pesticide           | 309    | Zamifenacin                               | 416.2185 | [M+H] <sup>+</sup> | Pharmaceutical        |
| 181    | 4-METHOXYFLAVONE                                    | 253.0879 | [M+H] <sup>+</sup> | Natural product       | 224    | Terephthalic acid                                                          | 165.0183 | [M+H] <sup>+</sup> | Industrial chemical   | 267    | 3,4-Dichloroaniline                  | 161.9898 | [M+H] <sup>+</sup> | Industrial chemical | 310    | Dihydrocapsaicin                          | 308.2228 | [M+H] <sup>+</sup> | Pharmaceutical        |
| 182    | Cholic acid                                         | 409.2935 | [M+H] <sup>+</sup> | Natural product       | 225    | 6-Phenyl-1,3,5-triazine-2,4-diamine                                        | 188.0934 | [M+H] <sup>+</sup> | Industrial chemical   | 268    | Tryptantrine                         | 249.0711 | [M+H] <sup>+</sup> | Natural product     | 311    | Brompheniramine                           | 319.082  | [M+H] <sup>+</sup> | Pharmaceutical        |
| 183    | Elaidic Acid                                        | 283.2643 | [M+H] <sup>+</sup> | Natural product       | 226    | 3,4-Dimethoxysalicylic acid                                                | 199.0603 | [M+H] <sup>+</sup> | Pharmaceutical        | 269    | Flutamide                            | 277.0829 | [M+H] <sup>+</sup> | Pharmaceutical      | 312    | N,N-Bis(2-hydroxyethyl)iodocanamide       | 288.2551 | [M+H] <sup>+</sup> | Personal care product |
| 184    | Nonanedioic acid                                    | 189.1133 | [M+H] <sup>+</sup> | Pesticide             | 227    | Sulfathiazole                                                              | 256.0193 | [M+H] <sup>+</sup> | Pharmaceutical        | 270    | 1-cyclohexyl-3-phenyl-urea           | 219.1494 | [M+H] <sup>+</sup> | Pesticide           | 313    | 2-(4-Nonylphenoxy)Acetic Acid             | 277.1808 | [M+H] <sup>+</sup> | Industrial chemical   |
| 185    | Glycocholic acid                                    | 466.3205 | [M+H] <sup>+</sup> | Natural product       | 228    | Senkirkine                                                                 | 366.1938 | [M+H] <sup>+</sup> | Natural product       | 271    | Clomipramine                         | 315.1616 | [M+H] <sup>+</sup> | Pharmaceutical      | 314    | Benz[de]anthracen-7-one                   | 231.0837 | [M+H] <sup>+</sup> | Industrial chemical   |
| 186    | Imazaquin                                           | 310.1182 | [M+H] <sup>+</sup> | Pesticide             | 229    | Dicyclohexylamine                                                          | 182.1889 | [M+H] <sup>+</sup> | Industrial chemical   | 272    | Diphenamid                           | 240.1405 | [M+H] <sup>+</sup> | Pesticide           | 315    | N-(2-hydroxyethyl)icosanamide             | 356.3513 | [M+H] <sup>+</sup> | Industrial chemical   |

| Number | Name                                       | M/Z       | mode               | Category              | Number | Name                               | M/Z      | mode               | Category              | Number | Name                                       | M/Z               | mode               | Category              |
|--------|--------------------------------------------|-----------|--------------------|-----------------------|--------|------------------------------------|----------|--------------------|-----------------------|--------|--------------------------------------------|-------------------|--------------------|-----------------------|
| 316    | Novaluron                                  | 491.0022  | [M-H] <sup>-</sup> | Pesticide             | 375    | Ellagic acid                       | 303.0114 | [M-H] <sup>+</sup> | Pharmaceutical        | 434    | Trichanolamine                             | 150.1125          | [M-H] <sup>+</sup> | Industrial chemical   |
| 317    | Triclocarban                               | 312.97    | [M-H] <sup>-</sup> | Personal care product | 376    | Isoxafutole                        | 360.0688 | [M-H] <sup>+</sup> | Pesticide             | 435    | TriethyleneglycolDimethylEther             | 179.1278          | [M-H] <sup>+</sup> | Industrial chemical   |
| 318    | Monomethyl phthalate                       | 181.0501  | [M-H] <sup>-</sup> | Industrial chemical   | 377    | Pyrazophos                         | 374.0979 | [M-H] <sup>+</sup> | Pesticide             | 436    | Triglycidylisocyanurate                    | 298.1034          | [M-H] <sup>-</sup> | Industrial chemical   |
| 319    | Vortioxetine                               | 299.156   | [M+H] <sup>+</sup> | Natural product       | 378    | Spingiosine                        | 300.2895 | [M-H] <sup>+</sup> | Natural product       | 437    | Triclosanchlorhexadecacts                  | 286.9439          | [M-H] <sup>-</sup> | Personal care product |
| 320    | Norfloxacin                                | 320.1391  | [M+H] <sup>+</sup> | Pharmaceutical        | 379    | Haloxypol                          | 360.0238 | [M-H] <sup>-</sup> | Pesticide             | 438    | Tricyclanol                                | 190.0433          | [M-H] <sup>-</sup> | Pesticide             |
| 321    | 3-Methylcatechol                           | 125.0595  | [M-H] <sup>-</sup> | Natural product       | 380    | Dehydroascrydiline                 | 167.1812 | [M-H] <sup>+</sup> | Pharmaceutical        | 439    | Hexamethylenediacrylate                    | 227.1278          | [M-H] <sup>-</sup> | Industrial chemical   |
| 322    | Benovamate                                 | 364.0865  | [M-H] <sup>-</sup> | Pesticide             | 381    | Acetildenafil                      | 467.2797 | [M-H] <sup>+</sup> | Pharmaceutical        | 440    | Nitroglyram                                | 271.0956          | [M-H] <sup>-</sup> | Pesticide             |
| 323    | 11-Keto-testosterone                       | 303.1931  | [M-H] <sup>-</sup> | Natural product       | 382    | 1-Octylpyrrolidin-2-One            | 198.1866 | [M-H] <sup>+</sup> | Personal care product | 441    | N-Nitrosodimethylamine                     | 75.0553           | [M-H] <sup>-</sup> | Industrial chemical   |
| 324    | Genistein                                  | 269.0455  | [M-H] <sup>-</sup> | Natural product       | 383    | N-Ethyl-4-menthane-3-carboxamide   | 212.2027 | [M-H] <sup>+</sup> | Food additive         | 442    | N-Nitrosodiethylamine                      | 103.0866          | [M-H] <sup>-</sup> | Industrial chemical   |
| 325    | Retinoate                                  | 301.2155  | [M-H] <sup>-</sup> | Pharmaceutical        | 384    | 13a-Hydroxyspanin                  | 265.1911 | [M-H] <sup>-</sup> | Natural product       | 443    | N-Nitrosodipropylamine                     | 131.1179          | [M-H] <sup>-</sup> | Industrial chemical   |
| 326    | Paeonol                                    | 165.0419  | [M-H] <sup>-</sup> | Pharmaceutical        | 385    | Vildagliptin                       | 304.1986 | [M-H] <sup>+</sup> | Pharmaceutical        | 444    | N-Nitrosodibutylamine                      | 159.1492          | [M-H] <sup>-</sup> | Industrial chemical   |
| 327    | 2-(Thiocyanatomethylthio)benzotriazole     | 238.9752  | [M-H] <sup>-</sup> | Industrial chemical   | 386    | Cycloheximide                      | 282.1703 | [M-H] <sup>+</sup> | Pharmaceutical        | 445    | N-Nitrosodiphenylamine                     | 199.0866          | [M-H] <sup>-</sup> | Industrial chemical   |
| 328    | Dimethyl isophthalate                      | 195.0509  | [M-H] <sup>-</sup> | Industrial chemical   | 387    | Dydrogesterone                     | 313.2178 | [M-H] <sup>+</sup> | Pharmaceutical        | 446    | N-Nitrosopyrrolidine                       | 101.0709          | [M-H] <sup>-</sup> | Industrial chemical   |
| 329    | Quinalofop-ethyl                           | 373.1011  | [M-H] <sup>-</sup> | Pesticide             | 388    | Scharol                            | 399.2797 | [M-H] <sup>+</sup> | Natural product       | 447    | Pyrazconil                                 | 315.1119          | [M-H] <sup>-</sup> | Pesticide             |
| 330    | Glucoserin                                 | 420.052   | [M-H] <sup>-</sup> | Food additive         | 389    | Flufenicol                         | 358.0102 | [M-H] <sup>-</sup> | Pesticide             | 448    | Pyrazoxone                                 | 439.0228          | [M-H] <sup>-</sup> | Pesticide             |
| 331    | 3,4-Dichlorophenylurea                     | 202.9777  | [M-H] <sup>-</sup> | Pesticide             | 390    | Tritosulfuron                      | 446.0366 | [M-H] <sup>+</sup> | Pesticide             | 449    | Pyridine                                   | 80.0495           | [M-H] <sup>+</sup> | Natural product       |
| 332    | senegalensin                               | 407.1836  | [M-H] <sup>-</sup> | Pharmaceutical        | 391    | Linoleic acid                      | 279.2336 | [M-H] <sup>-</sup> | Natural product       | 450    | Ferizone                                   | 255.1604          | [M-H] <sup>-</sup> | Pesticide             |
| 333    | Dinoterb                                   | 239.066   | [M-H] <sup>-</sup> | Pesticide             | 392    | 2,4,12-Octadecatrienamide          | 334.3134 | [M-H] <sup>+</sup> | Natural product       | 451    | Butachlor/Pretilachlor*                    | 312.173           | [M-H] <sup>-</sup> | Pesticide             |
| 334    | Bupofezin                                  | 306.1644  | [M+H] <sup>+</sup> | Pesticide             | 393    | HYOCHOLIC ACID                     | 409.2935 | [M-H] <sup>+</sup> | Natural product       | 452    | DimethylPhthalate                          | 195.0652          | [M-H] <sup>+</sup> | Personal care product |
| 335    | Gamolenic acid                             | 279.2326  | [M-H] <sup>-</sup> | Natural product       | 394    | L-Thyroxine                        | 777.6913 | [M-H] <sup>+</sup> | Pharmaceutical        | 453    | DiethylPhthalate                           | 247.0965          | [M-H] <sup>-</sup> | Industrial chemical   |
| 336    | Pregnenolone acetate                       | 359.254   | [M+H] <sup>+</sup> | Pharmaceutical        | 395    | 3-Methylsalicylic acid             | 153.0545 | [M-H] <sup>-</sup> | Natural product       | 454    | DibutylPhthalate/DiisobutylPhthalate       | 279.1596          | [M-H] <sup>-</sup> | Industrial chemical   |
| 337    | Coriolic acid                              | 295.2242  | [M-H] <sup>-</sup> | Industrial chemical   | 396    | Pantethine                         | 555.254  | [M-H] <sup>+</sup> | Pharmaceutical        | 455    | BenzyButylPhthalate                        | 313.144           | [M-H] <sup>-</sup> | Industrial chemical   |
| 338    | Salmeterol                                 | 416.2812  | [M+H] <sup>+</sup> | Pharmaceutical        | 397    | Oleoyl-glycerol                    | 357.3098 | [M-H] <sup>-</sup> | Personal care product | 456    | DicyclohexylPhthalate                      | 331.1904          | [M-H] <sup>-</sup> | Industrial chemical   |
| 339    | OPEO-8                                     | 559.3885  | [M+H] <sup>+</sup> | Industrial chemical   | 398    | Gosypol                            | 519.2037 | [M-H] <sup>+</sup> | Natural product       | 457    | 2-ButanoneOxime                            | 88.0757           | [M-H] <sup>-</sup> | Industrial chemical   |
| 340    | Triphenyl phosphate (TPHP)                 | 327.0806  | [M-H] <sup>-</sup> | Industrial chemical   | 399    | Diisononyl phthalate               | 419.3173 | [M-H] <sup>+</sup> | Industrial chemical   | 458    | Flutolanil                                 | 324.1206          | [M-H] <sup>-</sup> | Pesticide             |
| 341    | Zopiclone                                  | 389.1091  | [M-H] <sup>-</sup> | Pharmaceutical        | 400    | UV Absorber 234                    | 448.2388 | [M-H] <sup>-</sup> | Industrial chemical   | 459    | Bromobutide                                | 312.0957          | [M-H] <sup>-</sup> | Pesticide             |
| 342    | OPEO-6                                     | 471.3353  | [M-H] <sup>-</sup> | Industrial chemical   | 401    | Astaxanthin                        | 565.4002 | [M-H] <sup>+</sup> | Natural product       | 460    | Hexabromocyclododecane                     | 634.6436          | [M-H] <sup>-</sup> | Industrial chemical   |
| 343    | L-Aspartyl-L-Phenylalanine                 | 281.1128  | [M-H] <sup>-</sup> | Food additive         | 402    | Dipentyl phthalate                 | 307.1891 | [M-H] <sup>+</sup> | Industrial chemical   | 461    | Pentadecafluorooctanoic Acid               | 412.9664          | [M-H] <sup>-</sup> | Industrial chemical   |
| 344    | N-(2-hydroxypropyl)ddscanamide             | 258.2437  | [M-H] <sup>-</sup> | Industrial chemical   | 403    | Auraptene                          | 297.1519 | [M-H] <sup>-</sup> | Natural product       | 462    | Benobicyclon                               | 447.0492          | [M-H] <sup>-</sup> | Pesticide             |
| 345    | 4-(2,5-Diethoxy-4-nitrophenyl)impropholine | 297.1423  | [M-H] <sup>-</sup> | Natural product       | 404    | Andrastin A                        | 485.2564 | [M-H] <sup>-</sup> | Natural product       | 463    | Benazon                                    | 239.0496          | [M-H] <sup>-</sup> | Pesticide             |
| 346    | Estrone                                    | 271.1684  | [M-H] <sup>-</sup> | Pharmaceutical        | 405    | Acrylamide                         | 72.0444  | [M-H] <sup>+</sup> | Industrial chemical   | 464    | Malathion                                  | 331.0433          | [M-H] <sup>-</sup> | Pesticide             |
| 347    | Malaaxon                                   | 315.0708  | [M-H] <sup>-</sup> | Pesticide             | 406    | Acetamidiprid                      | 223.0745 | [M-H] <sup>+</sup> | Pesticide             | 465    | GlycidylMethacrylate                       | 143.0705          | [M-H] <sup>+</sup> | Industrial chemical   |
| 348    | Oleic acid                                 | 283.2643  | [M-H] <sup>-</sup> | Personal care product | 407    | 2-Aminopyridine                    | 95.0604  | [M-H] <sup>+</sup> | Pharmaceutical        | 466    | N-Methylidicylamine                        | 312.3624          | [M-H] <sup>+</sup> | Pharmaceutical        |
| 349    | Alumminicine                               | 323.1774  | [M-H] <sup>-</sup> | Natural product       | 408    | 2-Ethylhexanoic acid               | 143.1078 | [M-H] <sup>-</sup> | Industrial chemical   | 467    | 1-Methyl-2-pyrrolidone                     | 100.0757          | [M-H] <sup>+</sup> | Industrial chemical   |
| 350    | Diosgenin                                  | 415.3216  | [M-H] <sup>-</sup> | Pharmaceutical        | 409    | 2-(2-Ethoxyethoxy)ethanol          | 135.1016 | [M-H] <sup>-</sup> | Personal care product | 468    | Metaminostrobin                            | 284.1234          | [M-H] <sup>-</sup> | Pesticide             |
| 351    | Diphenyl phosphate                         | 251.035   | [M-H] <sup>-</sup> | Industrial chemical   | 410    | Oryzastobin                        | 392.1928 | [M-H] <sup>+</sup> | Pesticide             | 469    | Melanine                                   | 127.0727          | [M-H] <sup>+</sup> | Industrial chemical   |
| 352    | Casleran                                   | 207.175   | [M+H] <sup>+</sup> | Personal care product | 411    | Carbofuran                         | 222.1125 | [M-H] <sup>-</sup> | Pesticide             | 470    | Ethofumate                                 | 62.06             | [M-H] <sup>+</sup> | Personal care product |
| 353    | 1-Naphthylamine                            | 144.0827  | [M-H] <sup>-</sup> | Industrial chemical   | 412    | Quinofop-ethyl                     | 373.095  | [M-H] <sup>-</sup> | Pesticide             | 471    | Molinate                                   | 188.1104          | [M-H] <sup>-</sup> | Pesticide             |
| 354    | N,N-Dimethyl-N-p-tolylsulfamide            | 215.0855  | [M-H] <sup>-</sup> | Pesticide             | 413    | 2-Chloroaniline                    | 128.0262 | [M-H] <sup>-</sup> | Industrial chemical   | 472    | Tris(2-ethylhexyl)Phosphate                | 435.3598          | [M-H] <sup>-</sup> | Industrial chemical   |
| 355    | 8-Hydroxyquinoline-5-sulfonic acid         | 226.0172  | [M-H] <sup>-</sup> | Industrial chemical   | 414    | 3-Chloroaniline                    | 128.0262 | [M-H] <sup>-</sup> | Industrial chemical   | 473    | Tris(2-chloroethyl)Phosphate               | 284.9612          | [M-H] <sup>-</sup> | Industrial chemical   |
| 356    | Isofos                                     | 314.0475  | [M-H] <sup>-</sup> | Pesticide             | 415    | 4-Chloroaniline                    | 128.0262 | [M-H] <sup>-</sup> | Industrial chemical   | 474    | TricresylPhosphate                         | 369.125           | [M-H] <sup>-</sup> | Industrial chemical   |
| 357    | Aflatoxin G1                               | 329.0743  | [M-H] <sup>-</sup> | Natural product       | 416    | Cyanazine                          | 241.0963 | [M-H] <sup>-</sup> | Pesticide             | 475    | TriphenylPhosphate                         | 327.078           | [M-H] <sup>-</sup> | Industrial chemical   |
| 358    | Acetazolamide                              | 222.9945  | [M-H] <sup>-</sup> | Pharmaceutical        | 417    | Disulfoton                         | 275.0338 | [M-H] <sup>-</sup> | Pesticide             | 476    | TributylPhosphate                          | 267.1719          | [M-H] <sup>-</sup> | Industrial chemical   |
| 359    | Fraxidin                                   | 223.0618  | [M-H] <sup>-</sup> | Pesticide             | 418    | 2,4-Dinitrophenol                  | 183.0047 | [M-H] <sup>-</sup> | Industrial chemical   | 477    | Dinotefuran-13CS                           | 208.1301/206.1156 | [M-H] <sup>-</sup> | Pesticide             |
| 360    | Tricosanoic acid                           | 355.3594  | [M-H] <sup>-</sup> | Industrial chemical   | 419    | Dinotefuran                        | 201.0993 | [M-H] <sup>-</sup> | Pesticide             | 478    | Duon-D-6                                   | 239.0620/2370.474 | [M-H] <sup>-</sup> | Industrial chemical   |
| 361    | Benzoferap                                 | 431.0921  | [M-H] <sup>-</sup> | Pesticide             | 420    | Diphenylamine                      | 170.0965 | [M-H] <sup>+</sup> | Industrial chemical   | 479    | loehol                                     | 820.88031         | [M-H] <sup>-</sup> | Industrial chemical   |
| 362    | Flubromazolam                              | 371.0294  | [M-H] <sup>-</sup> | Pharmaceutical        | 421    | N,N-Dimethylacetamide              | 88.0757  | [M-H] <sup>+</sup> | Industrial chemical   | 480    | DL-Arginine                                | 174.11168         | [M-H] <sup>-</sup> | Industrial chemical   |
| 363    | Hinokiflavone                              | 539.097   | [M-H] <sup>-</sup> | Pharmaceutical        | 422    | N,N-Dimethyldodecylamine           | 214.2529 | [M-H] <sup>+</sup> | Industrial chemical   | 481    | Oleamide                                   | 281.27186         | [M-H] <sup>-</sup> | Industrial chemical   |
| 364    | Tonalide                                   | 259.2079  | [M-H] <sup>-</sup> | Personal care product | 423    | Simetryn                           | 214.1121 | [M-H] <sup>-</sup> | Pesticide             | 482    | Ricinoleic acid                            | 298.25079         | [M-H] <sup>-</sup> | Industrial chemical   |
| 365    | Suxibuzone                                 | 439.1797  | [M-H] <sup>-</sup> | Pharmaceutical        | 424    | Dymron                             | 267.1503 | [M-H] <sup>-</sup> | Pesticide             | 483    | Steraic acid                               | 284.27153         | [M-H] <sup>-</sup> | Personal care product |
| 366    | Moectinostat                               | 397.186   | [M-H] <sup>-</sup> | Pharmaceutical        | 425    | Thiacloprid                        | 253.0309 | [M-H] <sup>+</sup> | Pesticide             | 484    | 2,4,6-TBP                                  | 327.7734          | [M-H] <sup>-</sup> | Pesticide             |
| 367    | Tetraethylene glycol monododecyl ether     | 363.3101  | [M-H] <sup>-</sup> | Industrial chemical   | 426    | Thiadimil                          | 266.016  | [M-H] <sup>-</sup> | Pesticide             | 485    | 4-Bromophenol (4-BP)                       | 171.95238         | [M-H] <sup>-</sup> | Industrial chemical   |
| 368    | Monomyristin                               | 303.2501  | [M-H] <sup>-</sup> | Pesticide             | 427    | Thioycalam                         | 182.126  | [M-H] <sup>+</sup> | Pesticide             | 486    | Cresyl diphenyl phosphate (CDP)            | 340.08645         | [M-H] <sup>-</sup> | Industrial chemical   |
| 369    | GLYCOPYRRONIUM                             | 319.2136  | [M-H] <sup>-</sup> | Pharmaceutical        | 428    | Thiophanate-methyl                 | 343.0529 | [M-H] <sup>-</sup> | Pesticide             | 487    | Dimethyl phosphate (DMP)                   | 126.0082          | [M-H] <sup>-</sup> | Pesticide             |
| 370    | Hydroxyecdysone                            | 481.1108  | [M-H] <sup>-</sup> | Natural product       | 429    | 2,4-Dichlorophenoxyacetic acid     | 218.9621 | [M-H] <sup>-</sup> | Pesticide             | 488    | 2-Ethylhexyl diphenyl phosphate (EHDP)     | 362.1647          | [M-H] <sup>-</sup> | Industrial chemical   |
| 371    | 1-Palmitoylethanolamine                    | 452.2754  | [M-H] <sup>-</sup> | Pharmaceutical        | 430    | Decanoic acid                      | 171.1391 | [M-H] <sup>-</sup> | Industrial chemical   | 489    | Tri(p-tert-butylphenyl) phosphate (TBPP)   | 494.2586          | [M-H] <sup>-</sup> | Industrial chemical   |
| 372    | Thiophanate                                | 371.1003  | [M-H] <sup>-</sup> | Pesticide             | 431    | Tetrahydrodimethylphthalcanhydride | 165.0557 | [M-H] <sup>-</sup> | Industrial chemical   | 490    | Tris(2-chloro-2-propenyl) phosphate (TCPP) | 326.00083         | [M-H] <sup>-</sup> | Industrial chemical   |
| 373    | Fenit                                      | 371.1003  | [M-H] <sup>-</sup> | Pharmaceutical        | 432    | Tetraytrione                       | 441.078  | [M-H] <sup>-</sup> | Pesticide             | 491    | Trimethyl phosphate (TMP)                  | 140.02385         | [M-H] <sup>-</sup> | Pesticide             |
| 374    | Cefditoren                                 | 507.0565  | [M-H] <sup>-</sup> | Pharmaceutical        | 433    | Terephthalic Acid                  | 165.0193 | [M-H] <sup>-</sup> | Industrial chemical   | 492    | Tri-n-butyl phosphate (TNBP)               | 266.1647          | [M-H] <sup>-</sup> | Industrial chemical   |
| 493    | Tris(2-butoxyethyl) phosphate (TBEP)       | 398.24334 | [M-H] <sup>-</sup> | Industrial chemical   | 493    | Trichloroethylene                  | 131.9723 | [M-H] <sup>-</sup> | Industrial chemical   | 493    | Tris(2-chloro-2-propenyl) phosphate (TCPP) | 326.00083         | [M-H] <sup>-</sup> | Industrial chemical   |
| 494    | α-HBCD                                     | 641.64474 | [M-H] <sup>-</sup> | Industrial chemical   | 494    | Trichloroethylene                  | 131.9723 | [M-H] <sup>-</sup> | Industrial chemical   | 494    | Tris(2-chloro-2-propenyl) phosphate (TCPP) | 326.00083         | [M-H] <sup>-</sup> | Industrial chemical   |
| 495    | Nicotinamide                               | 122.04801 | [M-H] <sup>-</sup> | Industrial chemical   | 495    | Trichloroethylene                  | 131.9723 | [M-H] <sup>-</sup> | Industrial chemical   | 495    | Tris(2-chloro-2-propenyl) phosphate (TCPP) | 326.00083         | [M-H] <sup>-</sup> | Industrial chemical   |
| 496    | 2,2-methylbenzothiazole (MTBT)             | 149.02992 | [M-H] <sup>-</sup> | Food additive         | 496    | Trichloroethylene                  | 131.9723 | [M-H] <sup>-</sup> | Industrial chemical   | 496    | Tris(2-chloro-2-propenyl) phosphate (TCPP) | 326.00083         | [M-H] <sup>-</sup> | Industrial chemical   |
| 497    | Acetufurine                                | 162.99393 | [M-H] <sup>-</sup> | Food additive         | 497    | Trichloroethylene                  | 131.9723 | [M-H] <sup>-</sup> | Industrial chemical   | 497    | Tris(2-chloro-2-propenyl) phosphate (TCPP) | 326.00083         | [M-H] <sup>-</sup> | Industrial chemical   |
| 498    | Saccharin                                  | 182.99901 | [M-H] <sup>-</sup> | Food additive         | 498    | Trichloroethylene                  | 131.9723 | [M-H] <sup>-</sup> | Industrial chemical   | 498    | Tris(2-chloro-2-propenyl) phosphate (TCPP) | 326.00083         | [M-H] <sup>-</sup> | Industrial chemical   |
| 499    | Sorbitol                                   | 182.07904 | [M-H] <sup>-</sup> | Food additive         | 499    | Trichloroethylene                  | 131.9723 | [M-H] <sup>-</sup> | Industrial chemical   | 499    | Tris(2-chloro-2-propenyl) phosphate (TCPP) | 326.00083         | [M-H] <sup>-</sup> | Industrial chemical   |
| 500    | Sucralose                                  | 396.01455 | [M-H] <sup>-</sup> | Food additive         | 500    | Trichloroethylene                  | 131.9723 | [M-H] <sup>-</sup> | Industrial chemical   | 500    | Tris(2-chloro-2-propenyl) phosphate (TCPP) | 326.00083         | [M-H] <sup>-</sup> | Industrial chemical   |
| 501    | Diemogest                                  | 311.18853 | [M-H] <sup>-</sup> | Pharmaceutical        | 501    | Trichloroethylene                  | 131.9723 | [M-H] <sup>-</sup> | Industrial chemical   | 501    | Tris(2-chloro-2-propenyl) phosphate (TCPP) | 326.00083         | [M-H] <sup>-</sup> | Industrial chemical   |
| 502    | Estriol (4 isomers)                        | 288.17254 | [M-H] <sup>-</sup> | Pharmaceutical        | 502    | Trichloroethylene                  | 131.9723 | [M-H] <sup>-</sup> | Industrial chemical   | 502    | Tris(2-chloro-2-propenyl) phosphate (TCPP) | 326.00083         | [M-H] <sup>-</sup> | Industrial chemical   |
| 503    | Etonogestrel                               |           |                    |                       |        |                                    |          |                    |                       |        |                                            |                   |                    |                       |

| Number | Name                                            | m/z       | mode               | Category            | Number | Name                                        | m/z       | mode               | Category            | Number | Name                        | m/z       | mode               | Category            | Number | Name                                 | m/z       | mode               | Category            |
|--------|-------------------------------------------------|-----------|--------------------|---------------------|--------|---------------------------------------------|-----------|--------------------|---------------------|--------|-----------------------------|-----------|--------------------|---------------------|--------|--------------------------------------|-----------|--------------------|---------------------|
| 552    | Fenpiclonil                                     | 235.9908  | [M+H] <sup>+</sup> | Pesticide           | 602    | Perfluoro-2-propoxypropanoic acid (GenX)    | 329.975   | [M-H] <sup>-</sup> | Industrial chemical | 652    | Fcfofenadine                | 501.28791 | [M+H] <sup>+</sup> | Pharmaceutical      | 702    | Sulfamethoxazole                     | 253.05211 | [M+H] <sup>+</sup> | Pharmaceutical      |
| 553    | Fenpropidin                                     | 273.24565 | [M+H] <sup>+</sup> | Pesticide           | 603    | Perfluoro-2-propoxypropanoic acid (HPPO-DA) | 329.975   | [M-H] <sup>-</sup> | Industrial chemical | 653    | Fluconazole                 | 306.10407 | [M+H] <sup>+</sup> | Pharmaceutical      | 703    | Sulindac                             | 356.08824 | [M+H] <sup>+</sup> | Pharmaceutical      |
| 554    | Fenpropimorph                                   | 303.25621 | [M+H] <sup>+</sup> | Pesticide           | 604    | Perfluorobutane sulfonic acid (PFBS)        | 299.95027 | [M-H] <sup>-</sup> | Industrial chemical | 654    | Fluoxetine                  | 309.13405 | [M+H] <sup>+</sup> | Pharmaceutical      | 704    | Sulisobenzone                        | 308.03546 | [M+H] <sup>+</sup> | Pharmaceutical      |
| 555    | Fluazinam                                       | 463.95138 | [M+H] <sup>+</sup> | Pesticide           | 605    | Perfluorobutanoic acid (PFBA)               | 213.98648 | [M-H] <sup>-</sup> | Industrial chemical | 655    | Glibenclamide               | 493.14382 | [M+H] <sup>+</sup> | Pharmaceutical      | 705    | Tamoxifen                            | 371.22491 | [M+H] <sup>+</sup> | Pharmaceutical      |
| 556    | Fludoxonil                                      | 248.03973 | [M+H] <sup>+</sup> | Pesticide           | 606    | Perfluorodecanoic acid (PFDA)               | 513.96732 | [M-H] <sup>-</sup> | Industrial chemical | 656    | Glimepiride                 | 490.22499 | [M+H] <sup>+</sup> | Pharmaceutical      | 706    | Terbutaline                          | 225.13649 | [M+H] <sup>+</sup> | Pharmaceutical      |
| 557    | Flufenacet                                      | 363.06646 | [M+H] <sup>+</sup> | Pesticide           | 607    | Perfluorododecanoic acid (PFDDoDA)          | 613.96093 | [M-H] <sup>-</sup> | Industrial chemical | 657    | Haloperidol                 | 375.14013 | [M+H] <sup>+</sup> | Pharmaceutical      | 707    | Theobromine (Theophylline - isomere) | 180.06473 | [M+H] <sup>+</sup> | Pharmaceutical      |
| 558    | Flurtanone                                      | 333.09766 | [M+H] <sup>+</sup> | Pesticide           | 608    | Perfluoroheptanoic acid (PFH7a)             | 363.9769  | [M-H] <sup>-</sup> | Industrial chemical | 658    | Hydrochlorothiazide (HCTZ)  | 296.96447 | [M+H] <sup>+</sup> | Pharmaceutical      | 708    | Tiamulin                             | 493.32258 | [M+H] <sup>+</sup> | Pharmaceutical      |
| 559    | Flutrafal                                       | 301.10267 | [M+H] <sup>+</sup> | Pesticide           | 609    | Perfluorohexadecanoic acid (PFH16DA)        | 813.94815 | [M-H] <sup>-</sup> | Industrial chemical | 659    | Ifosfamide                  | 260.02482 | [M+H] <sup>+</sup> | Pharmaceutical      | 709    | Tramadol                             | 263.18853 | [M+H] <sup>+</sup> | Pharmaceutical      |
| 560    | Foramsulfuron                                   | 452.11142 | [M+H] <sup>+</sup> | Pesticide           | 610    | Perfluorohexane sulfonic acid (PFHS)        | 399.94388 | [M-H] <sup>-</sup> | Industrial chemical | 660    | Ivermectin B1a              | 874.50786 | [M+H] <sup>+</sup> | Pharmaceutical      | 710    | Triclosan                            | 287.95116 | [M+H] <sup>+</sup> | Pharmaceutical      |
| 561    | Fuberidazole                                    | 184.06366 | [M+H] <sup>+</sup> | Pesticide           | 611    | Perfluorohexanoic acid (PFH6a)              | 313.98009 | [M-H] <sup>-</sup> | Industrial chemical | 661    | Ketococonazole              | 530.14876 | [M+H] <sup>+</sup> | Pharmaceutical      | 711    | Trimethoprim                         | 290.13789 | [M+H] <sup>+</sup> | Pharmaceutical      |
| 562    | Hexythiazox                                     | 352.10123 | [M+H] <sup>+</sup> | Pesticide           | 612    | Perfluorononanoic acid (PFNA)               | 463.97051 | [M-H] <sup>-</sup> | Industrial chemical | 662    | Ketoprofen                  | 254.09429 | [M+H] <sup>+</sup> | Pharmaceutical      | 712    | Valproic acid                        | 144.11503 | [M+H] <sup>+</sup> | Pharmaceutical      |
| 563    | Isoproturon                                     | 206.14191 | [M+H] <sup>+</sup> | Pesticide           | 613    | Perfluorooctane sulfonic acid (PFOS)        | 499.93749 | [M-H] <sup>-</sup> | Industrial chemical | 663    | Levamisole                  | 204.07212 | [M+H] <sup>+</sup> | Pharmaceutical      | 713    | Valsartan                            | 435.22704 | [M+H] <sup>+</sup> | Pharmaceutical      |
| 564    | Limaron                                         | 248.01193 | [M+H] <sup>+</sup> | Pesticide           | 614    | Perfluorooctanoic acid (PFOA)               | 413.9737  | [M-H] <sup>-</sup> | Industrial chemical | 664    | Lidocaine                   | 234.17321 | [M+H] <sup>+</sup> | Pharmaceutical      | 714    | Venlafaxine                          | 277.20418 | [M+H] <sup>+</sup> | Pharmaceutical      |
| 565    | Mandipropamid                                   | 411.12374 | [M+H] <sup>+</sup> | Pesticide           | 615    | Perfluoropentanoic acid (PFPeA)             | 263.98328 | [M-H] <sup>-</sup> | Industrial chemical | 665    | Loperamide                  | 476.22306 | [M+H] <sup>+</sup> | Pharmaceutical      | 715    | Verapamil                            | 454.28316 | [M+H] <sup>+</sup> | Pharmaceutical      |
| 566    | (4-Chloro-2-methylphenyl)acetic acid (MCPA)     | 200.02402 | [M+H] <sup>+</sup> | Pesticide           | 616    | Perfluorotetradecanoic acid (PFTeDA)        | 713.95454 | [M-H] <sup>-</sup> | Industrial chemical | 666    | Loratadine                  | 382.14481 | [M+H] <sup>+</sup> | Pharmaceutical      | 716    | Benzyl butyl phthalate (BBP)         | 312.13616 | [M+H] <sup>+</sup> | Industrial chemical |
| 567    | Mecoprop                                        | 214.03967 | [M+H] <sup>+</sup> | Pesticide           | 617    | Perfluoroundecanoic acid (PFUnDA)           | 563.96412 | [M-H] <sup>-</sup> | Industrial chemical | 667    | Losartan                    | 422.16219 | [M+H] <sup>+</sup> | Pharmaceutical      | 717    | Bis(2-ethylhexyl) phthalate (DEHP)   | 390.27701 | [M+H] <sup>+</sup> | Industrial chemical |
| 568    | Mesosulfuron-methyl                             | 503.07807 | [M+H] <sup>+</sup> | Pesticide           | 618    | 10,11-Dihydro-10-hydroxycarbamazepine       | 254.10553 | [M+H] <sup>+</sup> | Pharmaceutical      | 668    | Mebendazole                 | 295.09569 | [M+H] <sup>+</sup> | Pharmaceutical      | 718    | Dibutyl phthalate (DBP)              | 278.15181 | [M+H] <sup>+</sup> | Industrial chemical |
| 569    | Metazachlor                                     | 277.09819 | [M+H] <sup>+</sup> | Pesticide           | 619    | 10,11-Dihydrocarbamazepine                  | 238.11061 | [M+H] <sup>+</sup> | Pharmaceutical      | 669    | Meclofenamic acid           | 295.01668 | [M+H] <sup>+</sup> | Pharmaceutical      | 719    | Monobenzyl Phthalate (MP)            | 256.07356 | [M+H] <sup>+</sup> | Industrial chemical |
| 570    | Methabenzthiazuron                              | 221.06228 | [M+H] <sup>+</sup> | Pesticide           | 620    | Aceclofenac                                 | 353.02216 | [M+H] <sup>+</sup> | Pharmaceutical      | 670    | Mefenamic acid              | 241.11028 | [M+H] <sup>+</sup> | Pharmaceutical      | 720    | Monobutyl Phthalate (MBP)            | 222.08921 | [M+H] <sup>+</sup> | Industrial chemical |
| 571    | Metrafenone                                     | 408.05724 | [M+H] <sup>+</sup> | Pesticide           | 621    | Acetaminophen                               | 151.06333 | [M+H] <sup>+</sup> | Pharmaceutical      | 671    | Memantine                   | 179.1674  | [M+H] <sup>+</sup> | Pharmaceutical      | 721    | Dodecamethylpentaloxane              | 384.14599 | [M+H] <sup>+</sup> | Industrial chemical |
| 572    | Metribuzin                                      | 214.08883 | [M+H] <sup>+</sup> | Pesticide           | 622    | Amitriptyline                               | 277.18305 | [M+H] <sup>+</sup> | Pharmaceutical      | 672    | Methadone                   | 309.20926 | [M+H] <sup>+</sup> | Pharmaceutical      | 722    | Hexamethylcyclotrisiloxane           | 222.05637 | [M+H] <sup>+</sup> | Industrial chemical |
| 573    | Metsulfuron methyl                              | 381.0743  | [M+H] <sup>+</sup> | Pesticide           | 623    | Amlodipine                                  | 408.1452  | [M+H] <sup>+</sup> | Pharmaceutical      | 673    | Methotrexate                | 454.17132 | [M+H] <sup>+</sup> | Pharmaceutical      | 723    | 4-Dodecylbenzenesulfonic acid        | 326.19157 | [M+H] <sup>+</sup> | Industrial chemical |
| 574    | Onadiazon                                       | 344.06945 | [M+H] <sup>+</sup> | Pesticide           | 624    | Amoxicillin                                 | 365.10454 | [M+H] <sup>+</sup> | Pharmaceutical      | 674    | Metoprolol                  | 267.18344 | [M+H] <sup>+</sup> | Pharmaceutical      | 724    | Laureth-5                            | 406.32944 | [M+H] <sup>+</sup> | Industrial chemical |
| 575    | Picloram                                        | 239.92601 | [M+H] <sup>+</sup> | Pesticide           | 625    | Atenolol                                    | 266.16304 | [M+H] <sup>+</sup> | Pharmaceutical      | 675    | Metronidazole               | 171.06439 | [M+H] <sup>+</sup> | Pharmaceutical      | 725    | Laurilsulfate                        | 266.15518 | [M+H] <sup>+</sup> | Industrial chemical |
| 576    | Picolinifen                                     | 376.08349 | [M+H] <sup>+</sup> | Pesticide           | 626    | Atorvastatin                                | 558.253   | [M+H] <sup>+</sup> | Pharmaceutical      | 676    | Mirtazapine                 | 265.1579  | [M+H] <sup>+</sup> | Pharmaceutical      | 726    | Octaethylene glycol                  | 370.22028 | [M+H] <sup>+</sup> | Industrial chemical |
| 577    | Pirimicarb                                      | 238.14298 | [M+H] <sup>+</sup> | Pesticide           | 627    | Azithromycin                                | 748.50853 | [M+H] <sup>+</sup> | Pharmaceutical      | 677    | N,N-Dimethyltetradecylamine | 241.27695 | [M+H] <sup>+</sup> | Industrial chemical | 727    | 4-hydroximatoxifen                   | 388.22711 | [M+H] <sup>+</sup> | Pharmaceutical      |
| 578    | Propamocarb                                     | 188.15248 | [M+H] <sup>+</sup> | Pesticide           | 628    | Bezafibrate                                 | 361.10809 | [M+H] <sup>+</sup> | Pharmaceutical      | 678    | Natamycin                   | 665.30474 | [M+H] <sup>+</sup> | Pharmaceutical      | 728    | 4-hydroxybenzothiazole/OBT           | 152.01646 | [M+H] <sup>+</sup> | Pharmaceutical      |
| 579    | Propiconazole 1                                 | 341.06978 | [M+H] <sup>+</sup> | Pesticide           | 629    | Bicalutamide                                | 430.06104 | [M+H] <sup>+</sup> | Pharmaceutical      | 679    | N-Desmethylcitalopram       | 310.14814 | [M+H] <sup>+</sup> | Pharmaceutical      | 729    | Ambroxol                             | 376.98586 | [M+H] <sup>+</sup> | Pharmaceutical      |
| 580    | Propoxycarbazon                                 | 398.08962 | [M+H] <sup>+</sup> | Pesticide           | 630    | Bisoprolol                                  | 325.22531 | [M+H] <sup>+</sup> | Pharmaceutical      | 680    | Niflumic acid               | 282.06161 | [M+H] <sup>+</sup> | Pharmaceutical      | 730    | Anastrozole                          | 294.17132 | [M+H] <sup>+</sup> | Pharmaceutical      |
| 581    | Propyzamide                                     | 255.02177 | [M+H] <sup>+</sup> | Pesticide           | 631    | Budesonide                                  | 430.23554 | [M+H] <sup>+</sup> | Pharmaceutical      | 681    | Norfloxacin                 | 295.1184  | [M+H] <sup>+</sup> | Pharmaceutical      | 731    | Azelastine                           | 382.16807 | [M+H] <sup>+</sup> | Pharmaceutical      |
| 582    | Proflumicarb                                    | 251.13439 | [M+H] <sup>+</sup> | Pesticide           | 632    | Carazolol                                   | 296.16813 | [M+H] <sup>+</sup> | Pharmaceutical      | 682    | Ofloxacine                  | 361.14378 | [M+H] <sup>+</sup> | Pharmaceutical      | 732    | Benzazone                            | 239.04959 | [M+H] <sup>+</sup> | Pharmaceutical      |
| 583    | Prothioconazole-desthio                         | 311.05922 | [M+H] <sup>+</sup> | Pesticide           | 633    | Carbamazepine                               | 236.09496 | [M+H] <sup>+</sup> | Pharmaceutical      | 683    | Omeprazole                  | 345.11471 | [M+H] <sup>+</sup> | Pharmaceutical      | 733    | Benzothiazium                        | 412.32101 | [M+H] <sup>+</sup> | Pharmaceutical      |
| 584    | Pyroxasulam                                     | 434.06202 | [M+H] <sup>+</sup> | Pesticide           | 634    | Carbamazepine 10,11-epoxide                 | 252.08988 | [M+H] <sup>+</sup> | Pharmaceutical      | 684    | Oxazepam                    | 286.05091 | [M+H] <sup>+</sup> | Pharmaceutical      | 734    | Benzothiazole                        | 136.02155 | [M+H] <sup>+</sup> | Pharmaceutical      |
| 585    | Quimerac                                        | 221.02436 | [M+H] <sup>+</sup> | Pesticide           | 635    | Cetirizine                                  | 388.15537 | [M+H] <sup>+</sup> | Pharmaceutical      | 685    | Oxycodone                   | 315.14706 | [M+H] <sup>+</sup> | Pharmaceutical      | 735    | Bosentan                             | 552.19113 | [M+H] <sup>+</sup> | Pharmaceutical      |
| 586    | Quinoxifen                                      | 306.99967 | [M+H] <sup>+</sup> | Pesticide           | 636    | Chloramphenicol                             | 322.01233 | [M+H] <sup>+</sup> | Pharmaceutical      | 686    | Parfenol                    | 205.13141 | [M+H] <sup>+</sup> | Pharmaceutical      | 736    | Bayoptol                             | 240.11497 | [M+H] <sup>+</sup> | Pharmaceutical      |
| 587    | Rimsulfuron                                     | 431.05694 | [M+H] <sup>+</sup> | Pesticide           | 637    | Chloroquine                                 | 319.18153 | [M+H] <sup>+</sup> | Pharmaceutical      | 687    | Paroxetine                  | 329.14272 | [M+H] <sup>+</sup> | Pharmaceutical      | 737    | Celecoxib                            | 382.08316 | [M+H] <sup>+</sup> | Pharmaceutical      |
| 588    | Silthiofam                                      | 267.11131 | [M+H] <sup>+</sup> | Pesticide           | 638    | Ciprofloxacin                               | 331.13322 | [M+H] <sup>+</sup> | Pharmaceutical      | 688    | Phenazone                   | 188.09496 | [M+H] <sup>+</sup> | Pharmaceutical      | 738    | Cetirizine                           | 389.16265 | [M+H] <sup>+</sup> | Pharmaceutical      |
| 589    | Simazine                                        | 201.07812 | [M+H] <sup>+</sup> | Pesticide           | 639    | Citalopram                                  | 324.16379 | [M+H] <sup>+</sup> | Pharmaceutical      | 689    | Propranolol                 | 259.15723 | [M+H] <sup>+</sup> | Pharmaceutical      | 739    | Chloridazon                          | 222.04287 | [M+H] <sup>+</sup> | Pharmaceutical      |
| 590    | Spiroxamine I                                   | 297.26678 | [M+H] <sup>+</sup> | Pesticide           | 640    | Clarithromycin                              | 747.47689 | [M+H] <sup>+</sup> | Pharmaceutical      | 690    | Pyridoxine                  | 169.07389 | [M+H] <sup>+</sup> | Pharmaceutical      | 740    | Chloroxuron                          | 291.08948 | [M+H] <sup>+</sup> | Pharmaceutical      |
| 591    | Sulfosulfuron                                   | 470.06784 | [M+H] <sup>+</sup> | Pesticide           | 641    | Clindamycin                                 | 424.17987 | [M+H] <sup>+</sup> | Pharmaceutical      | 691    | Pyrimethamine               | 248.08287 | [M+H] <sup>+</sup> | Pharmaceutical      | 741    | Chlortoluron                         | 213.07892 | [M+H] <sup>+</sup> | Pharmaceutical      |
| 592    | Terbutylazine                                   | 229.10942 | [M+H] <sup>+</sup> | Pesticide           | 642    | Clopidogrel                                 | 321.05903 | [M+H] <sup>+</sup> | Pharmaceutical      | 692    | Ramipril                    | 416.23112 | [M+H] <sup>+</sup> | Pharmaceutical      | 742    | Clofibrac acid                       | 213.0324  | [M+H] <sup>+</sup> | Pharmaceutical      |
| 593    | Terbutryl                                       | 241.13612 | [M+H] <sup>+</sup> | Pesticide           | 643    | Clozacin                                    | 326.12982 | [M+H] <sup>+</sup> | Pharmaceutical      | 693    | Ranitidine                  | 314.14126 | [M+H] <sup>+</sup> | Pharmaceutical      | 743    | Clonidine                            | 230.02463 | [M+H] <sup>+</sup> | Pharmaceutical      |
| 594    | Thifensulfuron methyl                           | 387.03072 | [M+H] <sup>+</sup> | Pesticide           | 644    | Codine                                      | 299.15214 | [M+H] <sup>+</sup> | Pharmaceutical      | 694    | Roxithromycin               | 836.52457 | [M+H] <sup>+</sup> | Pharmaceutical      | 744    | Clopidrogel                          | 322.0663  | [M+H] <sup>+</sup> | Pharmaceutical      |
| 595    | Triadimefon                                     | 293.0931  | [M+H] <sup>+</sup> | Pesticide           | 645    | Desvenlafaxine                              | 263.18853 | [M+H] <sup>+</sup> | Pharmaceutical      | 695    | Salbutamol                  | 239.15214 | [M+H] <sup>+</sup> | Pharmaceutical      | 745    | Cortisone                            | 361.20095 | [M+H] <sup>+</sup> | Pharmaceutical      |
| 596    | Trifloxystrobin                                 | 408.12969 | [M+H] <sup>+</sup> | Pesticide           | 646    | Diclofenac                                  | 295.01668 | [M+H] <sup>+</sup> | Pharmaceutical      | 696    | Sebacic acid                | 202.12051 | [M+H] <sup>+</sup> | Pharmaceutical      | 746    | Cyclophosphamide                     | 261.0321  | [M+H] <sup>+</sup> | Pharmaceutical      |
| 597    | Trifluraluron-methyl                            | 492.10389 | [M+H] <sup>+</sup> | Pesticide           | 647    | Diltiazem                                   | 414.16133 | [M+H] <sup>+</sup> | Pharmaceutical      | 697    | Setraline                   | 305.0738  | [M+H] <sup>+</sup> | Pharmaceutical      | 747    | Cyproterone                          | 375.17215 | [M+H] <sup>+</sup> | Pharmaceutical      |
| 598    | Trinexapac-ethyl                                | 252.09977 | [M+H] <sup>+</sup> | Pesticide           | 648    | Enalapril                                   | 376.19982 | [M+H] <sup>+</sup> | Pharmaceutical      | 698    | Simvastatin                 | 418.27192 | [M+H] <sup>+</sup> | Pharmaceutical      | 748    | DEET                                 | 192.13829 | [M+H] <sup>+</sup> | Pesticide           |
| 599    | Triticoazole                                    | 317.12949 | [M+H] <sup>+</sup> | Pesticide           | 649    | Erythromycin                                | 733.46124 | [M+H] <sup>+</sup> | Pharmaceutical      | 699    | Sotalol                     | 272.11946 | [M+H] <sup>+</sup> | Pharmaceutical      | 749    | Desloratadine                        | 311.13095 | [M+H] <sup>+</sup> | Pharmaceutical      |
| 600    | N-Ethyl perfluorooctane sulfonamide (N-EtFOSA)  | 526.98478 | [M+H] <sup>+</sup> | Pesticide           | 650    | Ferbendazole                                | 299.07285 | [M+H] <sup>+</sup> | Pharmaceutical      | 700    | Sparfloxacin                | 392.166   | [M+H] <sup>+</sup> | Pharmaceutical      | 750    | Dexamethasone                        | 393.20718 | [M+H] <sup>+</sup> | Pharmaceutical      |
| 601    | N-Methyl perfluorooctane sulfonamide (N-MeFOSA) | 512.96913 | [M+H] <sup>+</sup> | Industrial chemical | 651    | Fenofibrate                                 | 360.11284 | [M+H] <sup>+</sup> | Pharmaceutical      | 701    | Sulfazoxime                 | 284.01347 | [M+H] <sup>+</sup> | Pharmaceutical      | 751    | Dichlorvos                           | 220.95318 | [M+H] <sup>+</sup> | Pharmaceutical      |

| Number | Name                | m/z       | mode               | Category            | Number | Name                                                                 | m/z       | mode               | Category            | Number | Name                                   | m/z    | mode               | Category              |
|--------|---------------------|-----------|--------------------|---------------------|--------|----------------------------------------------------------------------|-----------|--------------------|---------------------|--------|----------------------------------------|--------|--------------------|-----------------------|
| 752    | Dimethachlor        | 256.10988 | [M+H] <sup>+</sup> | Pharmaceutical      | 810    | Sulfapyridine                                                        | 250.06447 | [M+H] <sup>+</sup> | Pharmaceutical      | 868    | 2,4-Dinitrophenol                      | 184.11 | [M-H] <sup>-</sup> | Pesticide             |
| 753    | Diphenhydramine     | 256.16959 | [M+H] <sup>+</sup> | Pharmaceutical      | 811    | Terbinafine                                                          | 292.20598 | [M+H] <sup>+</sup> | Pharmaceutical      | 869    | Cyhalothop Butyl                       | 357.38 | [M-H] <sup>-</sup> | Pesticide             |
| 754    | Dodemorph           | 282.27914 | [M+H] <sup>+</sup> | Pharmaceutical      | 812    | Triadimenol                                                          | 296.11603 | [M+H] <sup>+</sup> | Pharmaceutical      | 870    | Phenyl Ether                           | 170.21 | [M+H] <sup>+</sup> | Personal care product |
| 755    | Domperidone         | 426.16913 | [M+H] <sup>+</sup> | Pharmaceutical      | 813    | Triamcinolone                                                        | 395.18644 | [M+H] <sup>+</sup> | Pharmaceutical      | 871    | Dibutyltin dichloride                  | 303.85 | [M+H] <sup>+</sup> | Industrial chemical   |
| 756    | Drossiprenone       | 367.22677 | [M+H] <sup>+</sup> | Pharmaceutical      | 814    | Triethylphosphate                                                    | 183.07807 | [M+H] <sup>+</sup> | Pharmaceutical      | 872    | Dibutyltin dilaurate                   | 631.57 | [M+H] <sup>+</sup> | Industrial chemical   |
| 757    | Dolasetine          | 298.12601 | [M+H] <sup>+</sup> | Pharmaceutical      | 815    | Trimestopim                                                          | 291.14517 | [M+H] <sup>+</sup> | Pharmaceutical      | 873    | 2,6-Di-tert-butyl-p-cresol             | 220.35 | [M-H] <sup>-</sup> | Food additive         |
| 758    | EDDP                | 278.19033 | [M+H] <sup>+</sup> | Pharmaceutical      | 816    | Methyl acrylate                                                      | 86.09     | [M+H] <sup>+</sup> | Industrial chemical | 874    | Dibenzyl ether                         | 198.26 | [M-H] <sup>-</sup> | Industrial chemical   |
| 759    | Efavirenz           | 314.02011 | [M-H] <sup>-</sup> | Pharmaceutical      | 817    | Ethyl acrylate                                                       | 100.12    | [M+H] <sup>+</sup> | Industrial chemical | 875    | 2,4-Di-tert-pentylphenol               | 234.38 | [M-H] <sup>-</sup> | Industrial chemical   |
| 760    | Ethion              | 384.99489 | [M+H] <sup>+</sup> | Pharmaceutical      | 818    | Butyl acrylate                                                       | 128.17    | [M+H] <sup>+</sup> | Industrial chemical | 876    | N-[3-(dimethylamino)propyl] stearamide | 368.64 | [M+H] <sup>+</sup> | Industrial chemical   |
| 761    | Escmestane          | 297.18491 | [M+H] <sup>+</sup> | Pharmaceutical      | 819    | 2-Hydroxyethyl acrylate                                              | 116.12    | [M+H] <sup>+</sup> | Industrial chemical | 877    | Dimethyl Disulfide                     | 94.2   | [M+H] <sup>+</sup> | Food additive         |
| 762    | Fenoxycarb          | 302.13868 | [M+H] <sup>+</sup> | Pharmaceutical      | 820    | Propenoic acid 2-(dimethylamino)ethyl ester                          | 143.18    | [M+H] <sup>+</sup> | Industrial chemical | 878    | N,N-Dimethyldecylamine                 | 213.4  | [M+H] <sup>+</sup> | Industrial chemical   |
| 763    | Finasteride         | 373.28495 | [M+H] <sup>+</sup> | Pharmaceutical      | 821    | 2-Ethylhexyl acrylate                                                | 184.27    | [M+H] <sup>+</sup> | Industrial chemical | 879    | N,N-Dimethyldecylamine N-oxide         | 229.4  | [M+H] <sup>+</sup> | Personal care product |
| 764    | Flufenoxuron        | 487.02896 | [M+H] <sup>+</sup> | Pharmaceutical      | 822    | Acetone                                                              | 58.08     | [M+H] <sup>+</sup> | Industrial chemical | 880    | 3-Dimethylamino-propylamine            | 102.18 | [M+H] <sup>+</sup> | Personal care product |
| 765    | Flumequine          | 262.0874  | [M+H] <sup>+</sup> | Pharmaceutical      | 823    | Acetone Cyanohydrin                                                  | 85.1      | [M+H] <sup>+</sup> | Industrial chemical | 881    | Dimethylformamide                      | 73.1   | [M+H] <sup>+</sup> | Pesticide             |
| 766    | Fluxoxamine         | 319.16279 | [M+H] <sup>+</sup> | Pharmaceutical      | 824    | Acetaphate                                                           | 183.17    | [M+H] <sup>+</sup> | Industrial chemical | 882    | Tetramethylammonium hydroxide          | 91.15  | [M+H] <sup>+</sup> | Industrial chemical   |
| 767    | Genistin            | 433.11292 | [M+H] <sup>+</sup> | Pharmaceutical      | 825    | 2-Aminophenol                                                        | 109.13    | [M+H] <sup>+</sup> | Industrial chemical | 883    | Thiourea                               | 76.12  | [M+H] <sup>+</sup> | Pesticide             |
| 768    | Hydroxychloroquine  | 336.18372 | [M+H] <sup>+</sup> | Pharmaceutical      | 826    | 3-Aminophenol                                                        | 109.13    | [M+H] <sup>+</sup> | Industrial chemical | 884    | 2,4-Dichlorophenoxyacetic acid         | 221.04 | [M-H] <sup>-</sup> | Pesticide             |
| 769    | Imatinib            | 494.26629 | [M+H] <sup>+</sup> | Pharmaceutical      | 827    | 4-Aminophenol                                                        | 109.13    | [M+H] <sup>+</sup> | Industrial chemical | 885    | Decanoic acid                          | 172.26 | [M-H] <sup>-</sup> | Industrial chemical   |
| 770    | Imazalil            | 297.0556  | [M+H] <sup>+</sup> | Pharmaceutical      | 828    | Isobutyraldehyde                                                     | 72.11     | [M+H] <sup>+</sup> | Industrial chemical | 886    | Decyl alcohol                          | 158.28 | [M-H] <sup>-</sup> | Personal care product |
| 771    | Imipramine          | 281.20123 | [M+H] <sup>+</sup> | Pharmaceutical      | 829    | 2-Isobutoxyethanol                                                   | 118.17    | [M+H] <sup>+</sup> | Industrial chemical | 887    | Tetraethylenepentamine                 | 189.3  | [M+H] <sup>+</sup> | Industrial chemical   |
| 772    | Lenacil             | 235.1441  | [M+H] <sup>+</sup> | Pharmaceutical      | 830    | Isoprene                                                             | 68.12     | [M+H] <sup>+</sup> | Industrial chemical | 888    | Tetrahydrodimethylphthalic anhydride   | 166.17 | [M-H] <sup>-</sup> | Industrial chemical   |
| 773    | Lorazepam           | 321.01921 | [M+H] <sup>+</sup> | Pharmaceutical      | 831    | Limone                                                               | 136.23    | [M+H] <sup>+</sup> | Pharmaceutical      | 889    | Phytol                                 | 296.53 | [M-H] <sup>-</sup> | Industrial chemical   |
| 774    | Mebeverine          | 430.2588  | [M+H] <sup>+</sup> | Pharmaceutical      | 832    | Ivermectin                                                           | 875.11    | [M+H] <sup>+</sup> | Industrial chemical | 890    | Dimethyl Terephthalate                 | 194.18 | [M-H] <sup>-</sup> | Industrial chemical   |
| 775    | Medroxyprogesterone | 345.24242 | [M+H] <sup>+</sup> | Pharmaceutical      | 833    | Iminoctadine albesilate                                              | 1335.05   | [M+H] <sup>+</sup> | Industrial chemical | 891    | 1-Dodecanol                            | 186.33 | [M-H] <sup>-</sup> | Industrial chemical   |
| 776    | Mefenamic acid      | 242.11756 | [M+H] <sup>+</sup> | Pharmaceutical      | 834    | 2-Ethyl hexanoic acid                                                | 144.21    | [M-H] <sup>-</sup> | Industrial chemical | 892    | Lauramidic Propylbetaine               | 342.52 | [M-H] <sup>-</sup> | Personal care product |
| 777    | Metamitron          | 203.09274 | [M+H] <sup>+</sup> | Pharmaceutical      | 835    | Ethylene glycol                                                      | 62.07     | [M-H] <sup>-</sup> | Industrial chemical | 893    | Methyl laurate                         | 214.34 | [M-H] <sup>-</sup> | Industrial chemical   |
| 778    | Metconazole         | 320.15242 | [M+H] <sup>+</sup> | Pharmaceutical      | 836    | Ethylene glycol monoalkyl ether                                      | 90.12     | [M-H] <sup>-</sup> | Industrial chemical | 894    | Tert-dodecylthiol                      | 202.4  | [M-H] <sup>-</sup> | Industrial chemical   |
| 779    | Metroprolol         | 268.19072 | [M+H] <sup>+</sup> | Pharmaceutical      | 837    | Ethylene glycol monoethyl ether acetate                              | 160.21    | [M+H] <sup>+</sup> | Industrial chemical | 895    | Sodium dodecyl sulfate                 | 288.38 | [M-H] <sup>-</sup> | Industrial chemical   |
| 780    | Miconazole          | 414.9933  | [M+H] <sup>+</sup> | Pharmaceutical      | 838    | Ethylendiamine                                                       | 60.1      | [M+H] <sup>+</sup> | Industrial chemical | 896    | Triethylene Glycol Dimethyl Ether      | 178.23 | [M+H] <sup>+</sup> | Industrial chemical   |
| 781    | Myclobetani         | 289.12145 | [M+H] <sup>+</sup> | Pharmaceutical      | 839    | Ethylendiaminetetraacetic acid Alkylidimethylbenzylammonium chloride | 292.24    | [M+H] <sup>+</sup> | Industrial chemical | 897    | Triglycidyl Isocyanurate               | 297.26 | [M+H] <sup>+</sup> | Industrial chemical   |
| 782    | Mycophenolic acid   | 321.13326 | [M+H] <sup>+</sup> | Pharmaceutical      | 840    | 2-Chlorobenzyl Chloride                                              | 283.88    | [M+H] <sup>+</sup> | Pharmaceutical      | 898    | Triclosan and chlorine adducts         | 289.55 | [M-H] <sup>-</sup> | Industrial chemical   |
| 783    | Nitrofurantoin      | 237.02654 | [M-H] <sup>-</sup> | Pharmaceutical      | 841    | Chloroethane                                                         | 64.51     | [M+H] <sup>+</sup> | Industrial chemical | 899    | 1,2,3-Trichloropropane                 | 147.43 | [M-H] <sup>-</sup> | Industrial chemical   |
| 784    | Norgestimate        | 370.23767 | [M+H] <sup>+</sup> | Pharmaceutical      | 842    | 1-Octanol                                                            | 130.23    | [M+H] <sup>+</sup> | Industrial chemical | 900    | Trifluralin                            | 335.28 | [M+H] <sup>+</sup> | Industrial chemical   |
| 785    | Notriptyline        | 264.17468 | [M+H] <sup>+</sup> | Pharmaceutical      | 843    | Captan                                                               | 300.59    | [M+H] <sup>+</sup> | Pesticide           | 901    | 3,5,5-Trimethyl hexanol                | 144.25 | [M+H] <sup>+</sup> | Industrial chemical   |
| 786    | Ondansetron         | 294.16009 | [M+H] <sup>+</sup> | Pharmaceutical      | 844    | Glyphosate                                                           | 169.07    | [M+H] <sup>+</sup> | Pesticide           | 902    | Naphthalene                            | 128.17 | [M+H] <sup>+</sup> | Industrial chemical   |
| 787    | Oxizalin            | 347.10198 | [M+H] <sup>+</sup> | Pharmaceutical      | 845    | Glufosinate                                                          | 181.13    | [M+H] <sup>+</sup> | Pesticide           | 903    | Hexamethylene diacrylate               | 226.27 | [M+H] <sup>+</sup> | Industrial chemical   |
| 788    | Oxybutyrim          | 358.23767 | [M+H] <sup>+</sup> | Pharmaceutical      | 846    | 2-Cresol                                                             | 108.14    | [M+H] <sup>+</sup> | Pesticide           | 904    | Sodium nitroacetate                    | 235.1  | [M+H] <sup>+</sup> | Industrial chemical   |
| 789    | Pentoxifylline      | 279.14517 | [M+H] <sup>+</sup> | Pharmaceutical      | 847    | 3-Cresol                                                             | 108.14    | [M+H] <sup>+</sup> | Pesticide           | 905    | N-Nitrosodibutylamine                  | 158.24 | [M+H] <sup>+</sup> | Industrial chemical   |
| 790    | PFB5                | 298.94299 | [M-H] <sup>-</sup> | Industrial chemical | 848    | 4-Cresol                                                             | 108.14    | [M+H] <sup>+</sup> | Pesticide           | 906    | 2-Nitrotoluene                         | 137.14 | [M+H] <sup>+</sup> | Industrial chemical   |
| 791    | PFOA                | 412.96643 | [M-H] <sup>-</sup> | Industrial chemical | 849    | 2-Chlorobenzyl Chloride                                              | 161.03    | [M+H] <sup>+</sup> | Pharmaceutical      | 907    | 3-Nitrotoluene                         | 137.14 | [M+H] <sup>+</sup> | Industrial chemical   |
| 792    | PFOS                | 498.93022 | [M-H] <sup>-</sup> | Industrial chemical | 850    | Chloroacetic Acid                                                    | 94.5      | [M+H] <sup>+</sup> | Pesticide           | 908    | 4-Nitrotoluene                         | 137.14 | [M+H] <sup>+</sup> | Industrial chemical   |
| 793    | PFOSA               | 497.9462  | [M+H] <sup>+</sup> | Industrial chemical | 851    | Dichloroacetic Acid                                                  | 128.94    | [M+H] <sup>+</sup> | Pharmaceutical      | 909    | Nitrobenzene                           | 123.11 | [M+H] <sup>+</sup> | Industrial chemical   |
| 794    | Pindolol            | 249.15975 | [M+H] <sup>+</sup> | Pharmaceutical      | 852    | Trichloroacetic Acid                                                 | 163.39    | [M+H] <sup>+</sup> | Industrial chemical | 910    | Nitromethane                           | 61.04  | [M+H] <sup>+</sup> | Industrial chemical   |
| 795    | Pipamperone         | 376.23948 | [M+H] <sup>+</sup> | Pharmaceutical      | 853    | 2-Chloronitrobenzene                                                 | 157.55    | [M+H] <sup>+</sup> | Industrial chemical | 911    | 1-Nonanol                              | 144.25 | [M+H] <sup>+</sup> | Industrial chemical   |
| 796    | Pirimiphos-methyl   | 306.10358 | [M+H] <sup>+</sup> | Pesticide           | 854    | 3-Chloronitrobenzene                                                 | 157.55    | [M+H] <sup>+</sup> | Industrial chemical | 912    | 1-Hydroxyethane-1,1-diphosphonic Acid  | 206.03 | [M+H] <sup>+</sup> | Industrial chemical   |
| 797    | Pravastatin         | 423.23883 | [M-H] <sup>-</sup> | Pharmaceutical      | 855    | 4-Chloronitrobenzene                                                 | 157.55    | [M+H] <sup>+</sup> | Industrial chemical | 913    | Hydroquinone                           | 110.11 | [M-H] <sup>-</sup> | Personal care product |
| 798    | Prednisone          | 359.1853  | [M+H] <sup>+</sup> | Pharmaceutical      | 856    | Vinyl acetate                                                        | 86.09     | [M+H] <sup>+</sup> | Industrial chemical | 914    | Biphenyl                               | 154.21 | [M-H] <sup>-</sup> | Pesticide             |
| 799    | Primidone           | 219.1128  | [M+H] <sup>+</sup> | Pharmaceutical      | 857    | Propylene Oxide                                                      | 58.08     | [M+H] <sup>+</sup> | Industrial chemical | 915    | Catechol                               | 110.11 | [M-H] <sup>-</sup> | Industrial chemical   |
| 800    | Propachlor          | 212.08367 | [M+H] <sup>+</sup> | Pharmaceutical      | 858    | 1,3-Dioxolane                                                        | 74.08     | [M+H] <sup>+</sup> | Pharmaceutical      | 916    | Fenrazamid                             | 349.82 | [M+H] <sup>+</sup> | Pesticide             |
| 801    | Propanil            | 218.0134  | [M+H] <sup>+</sup> | Pharmaceutical      | 859    | Cyclohexanone                                                        | 98.14     | [M+H] <sup>+</sup> | Pesticide           | 917    | Phthalide                              | 271.91 | [M+H] <sup>+</sup> | Pharmaceutical        |
| 802    | Propylbenzazone     | 231.14919 | [M+H] <sup>+</sup> | Pharmaceutical      | 860    | Cyclohexane                                                          | 84.16     | [M+H] <sup>+</sup> | Pesticide           | 918    | 1,3-Butadiene                          | 54.09  | [M+H] <sup>+</sup> | Industrial chemical   |
| 803    | Pyramet             | 207.09505 | [M+H] <sup>+</sup> | Pharmaceutical      | 861    | N-(cyclohexylthio) phthalimide                                       | 261.34    | [M+H] <sup>+</sup> | Industrial chemical | 919    | Diallyl Phthalate                      | 246.26 | [M+H] <sup>+</sup> | Industrial chemical   |
| 804    | Raloxifen           | 474.17336 | [M+H] <sup>+</sup> | Pharmaceutical      | 862    | Dichlorobenzil                                                       | 172.01    | [M+H] <sup>+</sup> | Pesticide           | 920    | Diisobutyl Phthalate                   | 278.34 | [M+H] <sup>+</sup> | Industrial chemical   |
| 805    | Risperidone         | 411.21908 | [M+H] <sup>+</sup> | Pharmaceutical      | 863    | 2,4-Dichlorotoluene                                                  | 161.03    | [M+H] <sup>+</sup> | Pesticide           | 921    | Bis(2-methoxyethyl) phthalate          | 282.29 | [M+H] <sup>+</sup> | Industrial chemical   |
| 806    | Ropinorel           | 261.19614 | [M+H] <sup>+</sup> | Pharmaceutical      | 864    | 1,3-Dichloro-2-propanol                                              | 128.99    | [M+H] <sup>+</sup> | Pesticide           | 922    | 2-Butanone Oxime                       | 87.12  | [M+H] <sup>+</sup> | Industrial chemical   |
| 807    | Spiroxamine         | 298.27406 | [M+H] <sup>+</sup> | Pharmaceutical      | 865    | 2-Dichlorobenzene                                                    | 147       | [M+H] <sup>+</sup> | Pesticide           | 923    | Tert-Butyl Hydroperoxide               | 90.12  | [M+H] <sup>+</sup> | Industrial chemical   |
| 808    | Sulfadiazine        | 251.05972 | [M+H] <sup>+</sup> | Pharmaceutical      | 866    | 3-Dichlorobenzene                                                    | 147       | [M+H] <sup>+</sup> | Pesticide           | 924    | 2-sec-Butylphenol                      | 150.22 | [M-H] <sup>-</sup> | Industrial chemical   |
| 809    | Sulfamethazine      | 272.09102 | [M+H] <sup>+</sup> | Pharmaceutical      | 867    | 4-Dichlorobenzene                                                    | 147       | [M+H] <sup>+</sup> | Pesticide           | 925    | 4-tert-Butylphenol                     | 150.22 | [M-H] <sup>-</sup> | Industrial chemical   |

**Table S5** List of compounds at confidence level 2 and their properties

| Number                 | Precursor ion m/z | Mean RT (min) | Concentration by Quantem software (ng/L) |      |       |      | Neutral (Da) | Reference Ion      | Mass error (ppm) | Chemical formula Chemspider | Mzcloud ion product matching | mzCloud matching scores | No. of proposed structures | B.P. (°C) | log Kow | CAS NO      | Category            |
|------------------------|-------------------|---------------|------------------------------------------|------|-------|------|--------------|--------------------|------------------|-----------------------------|------------------------------|-------------------------|----------------------------|-----------|---------|-------------|---------------------|
|                        |                   |               | CPR                                      | PhR  | PIR   | UTR  |              |                    |                  |                             |                              |                         |                            |           |         |             |                     |
| Penbutolol             | 292.2260          | 8.2           | 4.56                                     | 6.99 | 1.17  | 1.89 | 291.2198     | [M+H] <sup>+</sup> | -4.0             | C18 H29 N O2                |                              | 42.6                    | 79                         | N/A       | 3.25    | 38363-40-5  | Pharmaceutical      |
| Lenacil                | 235.1430          | 7.4           | 26.9                                     | 11.5 | 5.76  | 38.9 | 234.1368     | [M+H] <sup>+</sup> | -4.8             | C13 H18 N2 O2               |                              | 44.3                    | 403                        | N/A       | 1.9     | 2164-08-1   | Pesticide           |
| Acetamiprid            | 223.0734          | 8.7           | 13.1                                     | 6.96 | 1.95  | 2.17 | 222.0672     | [M+H] <sup>+</sup> | -4.8             | C10 H11 Cl N4               |                              | 47.4                    | 20                         | N/A       | 0.8     | 135410-20-7 | Pesticide           |
| Terbuthylazine         | 230.1157          | 10.0          | 1.15                                     | 6.03 | 8.37  | 0.71 | 229.1094     | [M+H] <sup>+</sup> | -4.3             | C9 H16 Cl N5                |                              | 53.5                    | 52                         | N/A       | 2.7     | 5915-41-3   | Pesticide           |
| Lidocaine              | 235.1794          | 7.9           | 0.58                                     | 1.62 | 0.39  | 0.77 | 234.1732     | [M+H] <sup>+</sup> | -4.8             | C14 H22 N2 O                |                              | 78.6                    | 211                        | N/A       | 2.5     | 137-58-6    | Pharmaceutical      |
| Spiroxamine            | 298.2729          | 10.6          | 2.72                                     | 0.32 | 25.9  | 0.59 | 297.2668     | [M+H] <sup>+</sup> | -4.1             | C18 H35 N O2                |                              | 85.3                    | 41                         | 135       | 3.9     | 118134-30-8 | Pharmaceutical      |
| Benzyl butyl phthalate | 313.1421          | 10.5          | 24.3                                     | 44.5 | 64.5  | 28.6 | 312.1362     | [M+H] <sup>+</sup> | -4.9             | C19 H20 O4                  |                              | 89.9                    | 199                        | 370       | 4.9     | 85-68-7     | Industrial chemical |
| Diuron                 | 233.0232          | 9.7           | 48.5                                     | 78.8 | 223.2 | 43.3 | 232.0170     | [M+H] <sup>+</sup> | -4.6             | C9 H10 Cl2 N2 O             |                              | 94.6                    | 54                         | N/A       | 2.9     | 330-54-1    | Pesticide           |
| Triazophos             | 314.0709          | 10.0          | 31.2                                     | 2.06 | 2.10  | 3.12 | 313.0650     | [M+H] <sup>+</sup> | -4.4             | C12 H16 N3 O3 P S           |                              | 99                      | 41                         | N/A       | 3.7     | 24017-47-8  | Pesticide           |
| Propiconazole          | 342.0754          | 10.3          | 6435                                     | 254  | 330   | 0.00 | 341.0698     | [M+H] <sup>+</sup> | -4.7             | C15 H17 Cl2 N3 O2           |                              | 99.3                    | 14                         | N/A       | 3.7     | 60207-90-1  | Pesticide           |

|                          |          |      |      |      |      |      |          |                      |      |                                                                    |                                                                                       |      |     |       |       |             |                       |
|--------------------------|----------|------|------|------|------|------|----------|----------------------|------|--------------------------------------------------------------------|---------------------------------------------------------------------------------------|------|-----|-------|-------|-------------|-----------------------|
| Tramadol                 | 264.1949 | 8.2  | 8.28 | 6.52 | 19.2 | 3.77 | 263.1885 | [M+H] <sup>+</sup> 1 | -3.4 | C <sub>16</sub> H <sub>25</sub> N<br>O <sub>2</sub>                |    | 99.9 | 260 | N/A   | 1.35  | 27203-73-2  | Pharmaceutical        |
| Clomazone                | 240.0774 | 9.8  | 146  | 3.00 | 2.63 | 2.45 | 239.0713 | [M+H] <sup>+</sup> 1 | -4.8 | C <sub>12</sub> H <sub>14</sub> Cl<br>N<br>O <sub>2</sub>          |    | 99   | 154 | 275   | 2.45  | 81777-89-1  | Pesticide             |
| Venlafaxine              | 278.2105 | 8.3  | 1.86 | 3.73 | 5.67 | 35.4 | 277.2042 | [M+H] <sup>+</sup> 1 | -3.6 | C <sub>17</sub> H <sub>27</sub> N<br>O <sub>2</sub>                |    | 31.1 | 126 | N/A   | 2.1   | 93413-62-8  | Pharmaceutical        |
| 17beta-Estradiol         | 273.1840 | 9.8  | 9.10 | 30.4 | 15.3 | 25.5 | 272.1776 | [M+H] <sup>+</sup> 1 | -3.5 | C <sub>18</sub> H <sub>24</sub> O <sub>2</sub>                     |    | 34   | 151 | N/A   | 3.7   | 50-28-2     | Pharmaceutical        |
| Primidone                | 219.1118 | 7.9  | 18.3 | 18.2 | 50.0 | 31.7 | 218.1055 | [M+H] <sup>+</sup> 1 | -4.9 | C <sub>12</sub> H <sub>14</sub> N <sub>2</sub><br>O <sub>2</sub>   |    | 37.3 | 540 | N/A   | 0.25  | 125-33-7    | Pharmaceutical        |
| Normeperidine            | 234.1479 | 7.6  | 6.46 | 4.70 | 4.30 | 12.7 | 233.1416 | [M+H] <sup>+</sup> 1 | -4.2 | C <sub>14</sub> H <sub>19</sub> N<br>O <sub>2</sub>                |    | 52.8 | 587 | N/A   | 1.6   | 77-17-8     | Pharmaceutical        |
| Ciprofloxacin            | 332.1390 | 8.1  | 0.69 | 32.0 | 5.37 | 8.14 | 331.1332 | [M+H] <sup>+</sup> 1 | -4.7 | C <sub>17</sub> H <sub>18</sub> F<br>N <sub>3</sub> O <sub>3</sub> |   | 67.2 | 75  | N/A   | -0.45 | 85721-33-1  | Pharmaceutical        |
| Hexazinone               | 253.1649 | 9.4  | 4.03 | 49.3 | 0.69 | 0.65 | 252.1586 | [M+H] <sup>+</sup> 1 | -4.2 | C <sub>12</sub> H <sub>20</sub> N <sub>4</sub><br>O <sub>2</sub>   |  | 67.1 | 39  | N/A   | 1.2   | 51235-04-2  | Pesticide             |
| Galaxolidone             | 273.1839 | 10.5 | 933  | 2046 | 7120 | 6131 | 272.1776 | [M+H] <sup>+</sup> 1 | -3.9 | C <sub>18</sub> H <sub>24</sub> O <sub>2</sub>                     |  | 69.3 | 151 | 142.5 | 5.6   | 1222-05-5   | Personal care product |
| Phenolphthalein          | 319.0951 | 9.3  | 10.1 | 60.9 | 42.8 | 37.1 | 318.0892 | [M+H] <sup>+</sup> 1 | -4.4 | C <sub>20</sub> H <sub>14</sub> O <sub>4</sub>                     |  | 86   | 86  | N/A   | 2.45  | 77-09-8     | Industrial chemical   |
| Metolachlor morpholinone | 234.1478 | 7.7  | 29.3 | 29.2 | 5.21 | 10.5 | 233.1416 | [M+H] <sup>+</sup> 1 | -4.5 | C <sub>14</sub> H <sub>19</sub> N<br>O <sub>2</sub>                |  | 51.9 | 587 | N/A   | N/A   | 120375-14-6 | Pesticide             |

|                          |          |      |       |       |       |       |          |                    |      |                  |                                                                                       |      |     |       |      |             |                       |
|--------------------------|----------|------|-------|-------|-------|-------|----------|--------------------|------|------------------|---------------------------------------------------------------------------------------|------|-----|-------|------|-------------|-----------------------|
| Triphenylphosphine oxide | 279.0923 | 9.9  | 61.5  | 53.5  | 45.2  | 83.9  | 278.0861 | [M+H] <sup>+</sup> | -3.8 | C18 H15 O P      |    | 90.1 | 6   | 360   | 3.65 | 791-28-6    | Industrial chemical   |
| Climbazole               | 293.1041 | 9.6  | 3.24  | 1.89  | 105   | 2.03  | 292.0979 | [M+H] <sup>+</sup> | -3.7 | C15 H17 Cl N2 O2 |    | 61   | 73  | N/A   | 3.3  | 38083-17-9  | Personal care product |
| Pendimethalin            | 282.1439 | 10.8 | 0.00  | 43322 | 0.00  | 0.00  | 281.1376 | [M+H] <sup>+</sup> | -3.5 | C13 H19 N3 O4    |    | 57.2 | 2   | 200   | 5.1  | 40487-42-1  | Pesticide             |
| Metalaxyl                | 280.1533 | 9.6  | 85.4  | 27.5  | 246   | 65.0  | 279.1471 | [M+H] <sup>+</sup> | -3.8 | C15 H21 N O4     |    | 96.4 | 305 | N/A   | 1.7  | 57837-19-1  | Pesticide             |
| Buprofezin               | 306.1621 | 10.6 | 4.90  | 3.57  | 7.09  | 12.3  | 305.1562 | [M+H] <sup>+</sup> | -4.4 | C16 H23 N3 O S   |    | 96.5 | 20  | N/A   | 4.1  | 69327-76-0  | Pesticide             |
| Pretilachlor             | 312.1711 | 10.5 | 52.5  | 3.30  | 306   | 1.42  | 311.1652 | [M+H] <sup>+</sup> | -4.7 | C17 H26 Cl N O2  |    | 83.7 | 66  | N/A   | 3.9  | 51218-49-6  | Pesticide             |
| Tebuconazole             | 308.1511 | 10.2 | 19.0  | 0.76  | 0.89  | 0.80  | 307.1451 | [M+H] <sup>+</sup> | -4.4 | C16 H22 Cl N3 O  |    | 97.3 | 11  | N/A   | 3.7  | 107534-96-3 | Pesticide             |
| Atrazine                 | 216.1000 | 9.8  | 1157  | 0     | 18112 | 0     | 215.0938 | [M+H] <sup>+</sup> | -4.9 | C8 H14 Cl N5     |   | 70.8 | 48  | N/A   | 2.6  | 1912-24-9   | Pesticide             |
| Erucamide                | 338.3401 | 12.1 | 12398 | 28985 | 0     | 24226 | 337.3345 | [M+H] <sup>+</sup> | -5.0 | C22 H43 N O      |  | 97.3 | 25  | 202.5 | 7.35 | 112-84-5    | Industrial chemical   |
| Oleamide                 | 282.2781 | 11.1 | 0.00  | 17509 | 0     | 20379 | 281.2719 | [M+H] <sup>+</sup> | -4.0 | C18 H35 N O      |  | 98   | 54  | 202.5 | 6.35 | 301-02-0    | Industrial chemical   |
| 17beta-Trenbolone        | 271.1682 | 10.2 | 678   | 1899  | 908   | 3311  | 270.1620 | [M+H] <sup>+</sup> | -3.8 | C18 H22 O2       |  | 74.9 | 164 | N/A   | 3.9  | 10161-22-9  | Pharmaceutical        |

|              |          |     |      |      |       |      |          |                    |      |                 |  |
|--------------|----------|-----|------|------|-------|------|----------|--------------------|------|-----------------|--|
| Sulfadiazine | 251.0588 | 7.5 | 3.04 | 31.1 | 217.2 | 6.85 | 250.0525 | [M+H] <sup>+</sup> | -3.8 | C10 H10 N4 O2 S |  |
|--------------|----------|-----|------|------|-------|------|----------|--------------------|------|-----------------|--|

|                                |          |      |      |       |      |            |          |         |      |                                                                 |                                                                                      |      |     |     |                |            |                       |
|--------------------------------|----------|------|------|-------|------|------------|----------|---------|------|-----------------------------------------------------------------|--------------------------------------------------------------------------------------|------|-----|-----|----------------|------------|-----------------------|
| 2,4-Dichlorophenoxyacetic acid | 218.9622 | 12.0 | 7.38 | 278   | 311  | 290        | 219.9694 | [M-H]-1 | 0.1  | C <sub>8</sub> H <sub>6</sub> Cl <sub>2</sub> O <sub>3</sub>    | 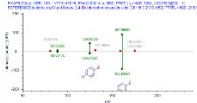  | 91.4 | 41  | N/A | 2.8            | 94-75-7    | Pesticide             |
| Mefenamic acid                 | 240.1031 | 13.0 | 3.48 | 1.94  | 63.0 | 230        | 241.1103 | [M-H]-1 | 0.4  | C <sub>15</sub> H <sub>15</sub> N O <sub>2</sub>                |   | 93   | 474 | N/A | 5              | 61-68-7    | Pharmaceutical        |
| Stearic acid                   | 283.2642 | 11.9 | 0.90 | 3.41  | 267  | 138        | 284.2715 | [M-H]-1 | -0.1 | C <sub>18</sub> H <sub>36</sub> O <sub>2</sub>                  |   | 50   | 148 | 376 | 8.23           | 57-11-4    | Personal care product |
| Lauryl sulfate                 | 265.1478 | 11.5 | 10.4 | 6.57  | 435  | 212        | 266.1552 | [M-H]-1 | -0.5 | C <sub>12</sub> H <sub>26</sub> O <sub>4</sub> S                |   | 99.2 | 6   | N/A | Not applicable | 151-21-3   | Industrial chemical   |
| Dinoterb                       | 239.0674 | 12.8 | 10.3 | 11.4  | 16.9 | 118        | 240.0746 | [M-H]-1 | 0.2  | C <sub>10</sub> H <sub>12</sub> N <sub>2</sub> O <sub>5</sub>   |   | 64.2 | 70  | N/A | 4.5            | 1420-07-1  | Pesticide             |
| 2,4-Dinitrophenol              | 183.0047 | 13.7 | 96.6 | 1.47  | 1.51 | 96.0       | 184.0120 | [M-H]-1 | -0.3 | C <sub>6</sub> H <sub>4</sub> N <sub>2</sub> O <sub>5</sub>     |   | 35.5 | 24  | 290 | 1.65           | 51-28-5    | Pesticide             |
| Bentazone                      | 239.0498 | 11.7 | 148  | 4.94  | 2.99 | 167        | 240.0569 | [M-H]-1 | 0.8  | C <sub>10</sub> H <sub>12</sub> N <sub>2</sub> O <sub>3</sub> S |   | 88.6 | 72  | N/A | 0.77           | 25057-89-0 | Pharmaceutical        |
| 4-Dodecylbenzenesulfonic acid  | 325.1839 | 13.5 | 0    | 18699 | 9623 | 25836<br>2 | 326.1916 | [M-H]-1 | -1.3 | C <sub>18</sub> H <sub>30</sub> O <sub>3</sub> S                |  | 99.4 | 19  | N/A | 6.25           | 27176-87-0 | Industrial chemical   |

B.P. (°C) and log Kow collected from PubChem database; ChemSpider database; EPA, 2011; Li Xie et al., 2021

**Table S6** List of compounds at confidence level 3 and their properties

| Number                                       | Precursor ion m/z | Mean RT (min) | Average peak intensity (10 <sup>5</sup> ) |         |         |        | Neutral mass (Da) | Reference Ion         | Mass error (ppm) | Chemical formula Chemspider | Product ion (m/z) matching | No. of proposed structures | B.P.(°C) | log Kow | CAS NO      | Category              |
|----------------------------------------------|-------------------|---------------|-------------------------------------------|---------|---------|--------|-------------------|-----------------------|------------------|-----------------------------|----------------------------|----------------------------|----------|---------|-------------|-----------------------|
|                                              |                   |               | CPR                                       | PhR     | PIR     | UTR    |                   |                       |                  |                             |                            |                            |          |         |             |                       |
| Hexa(methoxymethyl)melamine                  | 391.2281          | 15.1          | 180.8                                     | 0.0     | 116.0   | 72.1   | 390.2227          | [M+H] <sup>+</sup> 1  | -4.8             | C15 H30 N6 O6               | 177.0877, 253.1387         | 28                         | N/A      | 2       | 3089-11-0   | Industrial chemical   |
| Lopinavir                                    | 651.3518          | 9.5           | 13.9                                      | 41.0    | 13.4    | 15.5   | 628.3625          | [M+Na] <sup>+</sup> 1 | 0.2              | C37 H48 N4 O5               | 447.2640, 183.1130         | 10                         | N/A      | 5.1     | 192725-17-0 | Pharmaceutical        |
| Estradiol benzoate                           | 377.2123          | 9.2           | 57.6                                      | 20.6    | 15.1    | 1045.8 | 376.2038          | [M+H] <sup>+</sup> 1  | 3.1              | C25 H28 O3                  | 255.1746, 271.1694         | 45                         | N/A      | 5.7     | 50-50-0     | Pharmaceutical        |
| Methylprednisolone                           | 375.2173          | 13.6          | 0.0                                       | 67.0    | 174.9   | 0.0    | 374.2093          | [M+H] <sup>+</sup> 1  | 1.9              | C22 H30 O5                  | 357.206, 339.195           | 62                         | N/A      | 1.55    | 83-43-2     | Pharmaceutical        |
| Spirotetramat                                | 374.1975          | 10.0          | 46.2                                      | 63.3    | 43.4    | 440.1  | 373.1889          | [M+H] <sup>+</sup> 1  | 3.3              | C21 H27 N O5                | 304.1905, 79.0211          | 48                         | N/A      | 3.6     | 203313-25-1 | Pesticide             |
| Quisalofop-ethyl                             | 373.0955          | 2.9           | 0.0                                       | 2910.4  | 3210.0  | 1642.0 | 372.0877          | [M+H] <sup>+</sup> 1  | 1.6              | C19 H17 Cl N2 O4            | 299.06064, 91.05712        | 48                         | N/A      | 4.5     | 76578-14-8  | Pesticide             |
| Pyridaben                                    | 365.1466          | 10.6          | 0.0                                       | 10.6    | 10.7    | 0.0    | 364.1376          | [M+H] <sup>+</sup> 1  | 4.6              | C19 H25 Cl N2 O S           | 307.2709, 240.23117        | 39                         | N/A      | 6.3     | 96489-71-3  | Pesticide             |
| Nalmefene                                    | 340.1925          | 10.0          | 2137.6                                    | 21.1    | 82.7    | 20.2   | 339.1834          | [M+H] <sup>+</sup> 1  | 5.0              | C21 H25 N O3                | 340.20828, 204.13713       | 125                        | N/A      | 2.4     | 55096-26-9  | Pharmaceutical        |
| Mandestrobin                                 | 314.1737          | 10.4          | 14.3                                      | 16.4    | 16.8    | 455.5  | 313.1678          | [M+H] <sup>+</sup> 1  | -4.3             | C19 H23 N O3                | 200.06921, 242.11644       | 4                          | N/A      | 3.4     | 173662-97-0 | Pesticide             |
| N-Methylidodecylamine                        | 312.3611          | 14.6          | 84.1                                      | 30.3    | 0.0     | 78.6   | 311.3552          | [M+H] <sup>+</sup> 1  | -4.5             | C21 H45 N                   | 312.36124, 60.08089        | 6                          | 210      | 6.5     | 20630-75-5  | Pharmaceutical        |
| Dipentyl phthalate                           | 307.1890          | 9.8           | 10703.1                                   | 13493.5 | 4305.4  | 8222.9 | 306.1831          | [M+H] <sup>+</sup> 1  | -4.7             | C18 H26 O4                  | 145.10030, 119.08504       | 137                        | 338      | 5.75    | 131-18-0    | Industrial chemical   |
| Tetra(methoxymethyl)melamine (TMMM)          | 303.1763          | 8.8           | 456.1                                     | 54.8    | 128.0   | 1243.3 | 302.1703          | [M+H] <sup>+</sup> 1  | -4.1             | C11 H22 N6 O4               | 165.08725, 147.07936       | 15                         | N/A      | 1       | 4124-78-1   | Industrial chemical   |
| Vortioxetine                                 | 299.1581          | 7.8           | 31.1                                      | 95.0    | 44.9    | 52.9   | 298.1504          | [M+H] <sup>+</sup> 1  | 1.4              | C18 H22 N2 S                | 283.02939, 268.99603       | 27                         | N/A      | 3.25    | 508233-74-7 | Natural product       |
| Isoprothiolane                               | 291.0708          | 10.0          | 2025.2                                    | 28.0    | 186.2   | 13.5   | 290.0647          | [M+H] <sup>+</sup> 1  | -4.3             | C12 H18 O4 S2               | 188.96626, 144.97681       | 8                          | N/A      | 2.5     | 31088-93-4  | Pesticide             |
| N,N-Bis(2-hydroxyethyl)dodecanamide          | 288.2522          | 9.8           | 32589.9                                   | 16.8    | 21358.6 | 33.7   | 287.2460          | [M+H] <sup>+</sup> 1  | -4.1             | C16 H33 N O3                | 227.19928, 106.08596       | 21                         | N/A      | N/A     | 120-40-1    | Personal care product |
| Vulgarin                                     | 265.1425          | 17.3          | 10.9                                      | 33.1    | 10.7    | 27.9   | 264.1362          | [M+H] <sup>+</sup> 1  | -3.7             | C15 H20 O4                  | 194.94771, 176.93719       | 405                        | N/A      | N/A     | 1773016     | Pharmaceutical        |
| Galaxolide                                   | 259.2048          | 11.0          | 161.3                                     | 109.8   | 445.1   | 233.2  | 258.1984          | [M+H] <sup>+</sup> 1  | -3.2             | C18 H26 O                   | 185.02849, 175.11078       | 109                        | 143      | 5.6     | 1222-05-5   | Personal care product |
| 1-Tetradecanamine                            | 258.2784          | 9.9           | 51.3                                      | 16.8    | 0.0     | 0.0    | 257.2719          | [M+H] <sup>+</sup> 1  | -3.1             | C16 H35 N O                 | 85.10096, 57.07006         | 18                         | 268      | 6.2     | 112-72-1    | Industrial chemical   |
| N-(2-hydroxypropyl)dodecanamide dimethachlor | 258.2420          | 10.6          | 75.5                                      | 20.1    | 18.4    | 19.6   | 257.2355          | [M+H] <sup>+</sup> 1  | -3.1             | C15 H31 N O2                | 198.22054, 57.07006        | 50                         | N/A      | N/A     | 4292-10-8   | Industrial chemical   |
|                                              | 256.1088          | 10.1          | 66.0                                      | 20.0    | 337.1   | 22.0   | 255.1026          | [M+H] <sup>+</sup> 1  | -4.3             | C13 H18 Cl N O2             | 148.11111, 133.08786       | 128                        | N/A      | 2.55    | 50563-36-5  | Pharmaceutical        |
| Lamotrigine                                  | 256.0142          | 0.7           | 83.5                                      | 92.0    | 72.2    | 79.9   | 255.0079          | [M+H] <sup>+</sup> 1  | -3.5             | C9 H7 Cl2 N5                | 218.98257, 190.98746       | 25                         | N/A      | 0.85    | 84057-84-1  | Pharmaceutical        |
| Alibendol                                    | 252.1220          | 9.5           | 88.4                                      | 19.1    | 36.2    | 849.1  | 251.1158          | [M+H] <sup>+</sup> 1  | -4.0             | C13 H17 N O4                | 206.11656, 192.10063       | 393                        | N/A      | N/A     | 73504-20-8  | Pharmaceutical        |
| Matrine                                      | 249.1968          | 9.6           | 16.6                                      | 20.1    | 14.9    | 17.8   | 248.1889          | [M+H] <sup>+</sup> 1  | 2.7              | C15 H24 N2 O                | 231.18623, 161.10789       | 162                        | N/A      | 0       | 519-02-8    | Pharmaceutical        |
| Reynosin                                     | 249.1475          | 19.8          | 96.8                                      | 205.7   | 87.1    | 181.0  | 248.1412          | [M+H] <sup>+</sup> 1  | -4.1             | C15 H20 O3                  | 207.05280, 163.02669       | 512                        | N/A      | N/A     | 56834-45-8  | Natural product       |

| Number                                                   | Precursor ion m/z | Mean RT (min) | Average peak intensity (10 <sup>5</sup> ) |         |         |         | Neutral mass (Da) | Reference Ion        | Mass error (ppm) | Chemical formula Chemspider | Product ion (m/z) matching | No. of proposed structures | B.P.(°C) | log Kow | CAS NO      | Category              |
|----------------------------------------------------------|-------------------|---------------|-------------------------------------------|---------|---------|---------|-------------------|----------------------|------------------|-----------------------------|----------------------------|----------------------------|----------|---------|-------------|-----------------------|
|                                                          |                   |               | CPR                                       | PhR     | PIR     | UTR     |                   |                      |                  |                             |                            |                            |          |         |             |                       |
| Diallyl Phthalate                                        | 247.0956          | 9.5           | 1198.3                                    | 1406.4  | 503.2   | 2409.6  | 246.0892          | [M+H] <sup>+</sup> 1 | -3.8             | C14 H14 O4                  | 131.0848, 105.06961        | 269                        | 290      | 2.5     | 131-17-9    | Industrial chemical   |
| Allylescaline                                            | 238.1427          | 0.8           | 57.2                                      | 112.1   | 69.6    | 962.2   | 237.1365          | [M+H] <sup>+</sup> 1 | -4.8             | C13 H19 N O3                | 163.08549, 91.05713        | 321                        | N/A      | N/A     | 16840-08-7  | Pharmaceutical        |
| Buturon                                                  | 237.0781          | 12.3          | 3878.3                                    | 8182.4  | 0.0     | 4537.4  | 236.0716          | [M+H] <sup>+</sup> 1 | -3.4             | C12 H13 Cl N2 O             | 223.06244, 91.05708        | 97                         | N/A      | 2.6     | 3766-06-1   | Pesticide             |
| Pterodin G                                               | 235.1319          | 9.3           | 11329.9                                   | 17140.3 | 4239.4  | 16015.6 | 234.1256          | [M+H] <sup>+</sup> 1 | -4.3             | C14 H18 O3                  | 119.08506, 105.06960       | 518                        | N/A      | N/A     | 31835-23-1  | Natural product       |
| N,N-Dimethyldodecylamine-N-oxide                         | 230.2468          | 9.7           | 356.6                                     | 198.2   | 148.3   | 0.0     | 229.2406          | [M+H] <sup>+</sup> 1 | -4.4             | C14 H31 N O                 | 83.08527, 57.07006         | 23                         | N/A      | 2.5     | 1643-20-5   | Industrial chemical   |
| Formetanate                                              | 222.1229          | 16.2          | 220.5                                     | 382.4   | 210.9   | 110.8   | 221.1164          | [M+H] <sup>+</sup> 1 | -3.6             | C11 H15 N3 O2               | 194.09196, 180.07628       | 239                        | N/A      | 1.6     | 22259-30-9  | Pesticide             |
| 2,3,4,9-Tetrahydro-6-methoxy-1H-pyrido(3,4-b)indol-1-one | 217.0972          | 9.7           | 245.1                                     | 107.2   | 2292.9  | 16.6    | 216.0899          | [M+H] <sup>+</sup> 1 | 0.0              | C12 H12 N2 O2               | 158.05904, 130.06444       | 594                        | N/A      | N/A     | 105051-22-3 | Pharmaceutical        |
| Ethyl butylacetylaminopropionate                         | 216.1584          | 9.4           | 527.1                                     | 1274.1  | 171.7   | 1132.0  | 215.1521          | [M+H] <sup>+</sup> 1 | -4.8             | C11 H21 N O3                | 188.10579, 160.07483       | 174                        | N/A      | N/A     | 52304-43-5  | Personal care product |
| 3,4-Dimethoxycinnamic acid                               | 209.0798          | 9.0           | 1380.3                                    | 583.9   | 578.7   | 2079.1  | 208.0736          | [M+H] <sup>+</sup> 1 | -4.8             | C11 H12 O4                  | 127.12236, 91.05399        | 2                          | N/A      | 2       | 2316-09-8   | Food additive         |
| Aspirin                                                  | 181.0488          | 15.9          | 0.0                                       | 0.0     | 0.0     | 518.5   | 180.0423          | [M+H] <sup>+</sup> 1 | -4.0             | C9 H8 O4                    | 102.96997, 84.95947        | 175                        | 140      | 1.3     | 50-78-2     | Pharmaceutical        |
| Hydroxycinnamic acid                                     | 165.0538          | 7.6           | 33.5                                      | 49.1    | 26.2    | 47.2    | 164.0473          | [M+H] <sup>+</sup> 1 | -4.7             | C9 H8 O3                    | 137.02853, 105.00304       | 207                        | N/A      | 2       | 14755-02-3  | Pharmaceutical        |
| Nicotine                                                 | 163.1237          | 9.3           | 15.4                                      | 19.4    | 13.1    | 16.9    | 162.1157          | [M+H] <sup>+</sup> 1 | 4.7              | C10 H14 N2                  | 105.03323, 95.04897        | 4                          | 247      | 1.17    | 54-11-5     | Pharmaceutical        |
| Meglutol                                                 | 163.0595          | 8.9           | 0.0                                       | 0.0     | 0.0     | 102.1   | 162.0528          | [M+H] <sup>+</sup> 1 | -4.0             | C6 H10 O5                   | 115.05383, 91.05405        | 120                        | N/A      | N/A     | 322-79-2    | Pharmaceutical        |
| 3,4-Dihydrocoumarin                                      | 149.0596          | 17.0          | 81.7                                      | 188.0   | 0.0     | 0.0     | 148.0524          | [M+H] <sup>+</sup> 1 | -0.6             | C9 H8 O2                    | 84.95952, 70.98031         | 168                        | 261      | 1.55    | 119-84-6    | Food additive         |
| Glycidyl methacrylate                                    | 143.0695          | 7.9           | 612.1                                     | 0.0     | 0.0     | 163.7   | 142.0630          | [M+H] <sup>+</sup> 1 | -4.7             | C7 H10 O3                   | 69.03339, 55.05424         | 381                        | 189      | 0.8     | 106-91-2    | Industrial chemical   |
| N-Nitrosodipropylamine                                   | 131.1172          | 7.9           | 21.7                                      | 192.8   | 25.9    | 220.4   | 130.1106          | [M+H] <sup>+</sup> 1 | -4.9             | C6 H14 N2 O                 | 98.98386, 72.04423         | 167                        | 206      | 1.4     | 621-64-7    | Industrial chemical   |
| Melamine                                                 | 127.0721          | 0.8           | 186.1                                     | 133.6   | 108.7   | 314.0   | 126.0654          | [M+H] <sup>+</sup> 1 | -4.7             | C3 H6 N6                    | 85.0510, 68.0244           | 6                          | 350      | -0.75   | 108-78-1    | Industrial chemical   |
| 3-Methylcatechol                                         | 125.0591          | 8.3           | 1412.9                                    | 817.3   | 3236.7  | 1723.2  | 124.0524          | [M+H] <sup>+</sup> 1 | -4.8             | C7 H8 O2                    | 108.0210, 123.0440         | 157                        | 243      | 1.65    | 503-86-6    | Natural product       |
| Indoline                                                 | 120.0803          | 2.8           | 14.9                                      | 64.0    | 15.8    | 137.0   | 119.0735          | [M+H] <sup>+</sup> 1 | -4.1             | C8 H9 N                     | 103.0595, 91.5399          | 65                         | 221      | 2       | 496-15-1    | Pharmaceutical        |
| N-Nitrosodiethylamine                                    | 103.0863          | 13.9          | 69.5                                      | 39.5    | 67.4    | 143.0   | 102.0793          | [M+H] <sup>+</sup> 1 | -3.0             | C4 H10 N2 O                 | 75.091, 103.0862           | 61                         | 177      | 0.5     | 55-18-5     | Industrial chemical   |
| N-Nitrosopyrrolidine                                     | 101.0707          | 0.8           | 35.0                                      | 14.0    | 60.0    | 11.1    | 100.0637          | [M+H] <sup>+</sup> 1 | -2.5             | C4 H8 N2 O                  | 70.0651, 55.0542           | 77                         | 214      | 0.25    | 930-55-2    | Industrial chemical   |
| 1-Methyl-2-pyrrolidone                                   | 100.0754          | 9.4           | 0.0                                       | 0.0     | 0.0     | 4570.0  | 99.0684           | [M+H] <sup>+</sup> 1 | -3.3             | C5 H9 N O                   | 69.03291, 58.02891         | 132                        | 202      | -0.6    | 872-50-4    | Industrial chemical   |
| Cyclohexanone                                            | 99.0802           | 5.1           | 0.0                                       | 0.0     | 10847.9 | 10739.8 | 98.0732           | [M+H] <sup>+</sup> 1 | -2.8             | C6 H10 O                    | 70.0651, 55.0542           | 242                        | 156      | 0.9     | 108-94-1    | Pesticide             |
| N,N-Dimethylacetamide                                    | 88.0754           | 6.8           | 20322.4                                   | 10461.5 | 12509.7 | 11012.2 | 87.0684           | [M+H] <sup>+</sup> 1 | -2.9             | C4 H9 N O                   | 58.0281, 43.0184           | 90                         | 166      | -0.7    | 127-19-5    | Industrial chemical   |
| Pyridine                                                 | 80.0493           | 15.6          | 60.3                                      | 113.2   | 81.5    | 56.1    | 79.0422           | [M+H] <sup>+</sup> 1 | -2.8             | C5 H5 N                     | 53.0416, 52.0338           | 11                         | 115      | 0.65    | 110-86-1    | Natural product       |
| N-Nitrosodimethylamine                                   | 75.0551           | 1.9           | 847.9                                     | 919.0   | 1262.6  | 1089.2  | 74.0480           | [M+H] <sup>+</sup> 1 | -2.2             | C2 H6 N2 O                  | 58.0281, 75.0551           | 14                         | 153      | -0.35   | 62-75-9     | Industrial chemical   |

| Number                                       | Precursor ion m/z | Mean RT (min) | Average peak intensity (10 <sup>5</sup> ) |         |         |         | Neutral mass (Da) | Reference Ion        | Mass error (ppm) | Chemical formula Chemspider | Product ion (m/z) matching | No. of proposed structures | B.P.(°C) | log Kow | CAS NO     | Category              |
|----------------------------------------------|-------------------|---------------|-------------------------------------------|---------|---------|---------|-------------------|----------------------|------------------|-----------------------------|----------------------------|----------------------------|----------|---------|------------|-----------------------|
|                                              |                   |               | CPR                                       | PhR     | PIR     | UTR     |                   |                      |                  |                             |                            |                            |          |         |            |                       |
| Dimethylformamide                            | 74.0599           | 4.1           | 9487.7                                    | 11353.1 | 0.0     | 0.0     | 73.0528           | [M+H] <sup>+</sup> 1 | -2.6             | C3 H7 N O                   | 59.0604, 74.05985          | 29                         | 153      | -0.9    | 68-12-2    | Pesticide             |
| Isobutyraldehyde                             | 73.0646           | 5.8           | 0.0                                       | 10955.9 | 10828.5 | 13560.2 | 72.0575           | [M+H] <sup>+</sup> 1 | -2.4             | C4 H8 O                     | 57.0332, 73.06462          | 36                         | 64       | 0.7     | 78-84-2    | Industrial chemical   |
| Acrylamide                                   | 72.0442           | 7.8           | 0.0                                       | 169.4   | 0.0     | 791.7   | 71.0371           | [M+H] <sup>+</sup> 1 | -2.2             | C3 H5 N O                   | 55.0297, 72.04424          | 29                         | 125      | -0.7    | 79-06-1    | Industrial chemical   |
| Acetone                                      | 59.0493           | 2.1           | 21049.2                                   | 24746.7 | 28751.0 | 43086.1 | 58.0419           | [M+H] <sup>+</sup> 1 | 2.3              | C3 H6 O                     | 59.04927*                  | 19                         | 56       | -0.24   | 67-64-1    | Industrial chemical   |
| 4-(2,5-Diethoxy-4-nitrophenyl)morpholine     | 297.1434          | 0.9           | 9.4                                       | 45.8    | 18.3    | 36.6    | 296.1372          | [M+H] <sup>+</sup> 1 | -3.5             | C14 H20 N2 O5               | 283.02933, 268.99814       | 63                         | N/A      | N/A     | 5220-41-7  | Natural product       |
| Diethanolamine                               | 106.0860          | 5.4           | 38.1                                      | 50.7    | 50.7    | 84.6    | 105.0790          | [M+H] <sup>+</sup> 1 | -2.3             | C4 H11 N O2                 | 72.99792, 56.04966         | 34                         | 270      | -1.45   | 111-42-2   | Personal care product |
| Tert-Butyl Hydroperoxide                     | 91.0751           | 1.8           | 676.8                                     | 543.1   | 511.2   | 512.8   | 90.0681           | [M+H] <sup>+</sup> 1 | -2.2             | C4 H10 O2                   | 73.0650, 53.00252          | 34                         | 111      | 0.6     | 75-91-2    | Industrial chemical   |
| Paconol                                      | 165.0558          | 10.7          | 333.7                                     | 295.5   | 153.1   | 107.1   | 166.0630          | [M-H] <sup>-</sup> 1 | 1.0              | C9 H10 O3                   | 149.0603, 121.0666         | 421                        | N/A      | 1.65    | 103-93-5   | Pharmaceutical        |
| (4-Chloro-2-methylphenoxy)acetic acid (MCPA) | 199.0168          | 11.3          | 0.5                                       | 3.5     | 2.3     | 12.0    | 200.0240          | [M-H] <sup>-</sup> 1 | 0.5              | C9 H9 Cl O3                 | 155.0268, 141.0113         | 144                        | N/A      | 2.65    | 94-74-6    | Pesticide             |
| Saccharin                                    | 181.9919          | 2.7           | 8.5                                       | 1.1     | 17.9    | 2825.0  | 182.9990          | [M-H] <sup>-</sup> 1 | 0.7              | C7 H5 N O3 S                | 139.0241, 121.0135         | 14                         | 229      | -0.85   | 81-07-2    | Food additive         |
| Sebacic acid                                 | 201.1134          | 13.6          | 311.9                                     | 0.0     | 0.0     | 0.0     | 202.1205          | [M-H] <sup>-</sup> 1 | 0.7              | C10 H18 O4                  | 157.1330, 139.1224         | 269                        | 343      | 1.6     | 111-20-6   | Pharmaceutical        |
| Benzothiazole-2-sulfonic acid                | 213.9640          | 10.3          | 1479.3                                    | 239.6   | 232.6   | 2636.1  | 214.9711          | [M-H] <sup>-</sup> 1 | 0.8              | C7 H5 N O3 S2               | 134.00700, 57.97505        | 6                          | N/A      | N/A     | 87-03-6    | Industrial chemical   |
| Dibutyl phthalate                            | 277.1445          | 13.0          | 2301.0                                    | 2595.1  | 2749.1  | 2085.8  | 278.1518          | [M-H] <sup>-</sup> 1 | -0.1             | C16 H22 O4                  | 149.0234, 121.0285         | 248                        | 340      | 4.6     | 84-74-2    | Industrial chemical   |
| 2-(4-Nonylphenoxy)Acetic Acid                | 277.1809          | 13.2          | 599.1                                     | 16.0    | 237.0   | 906.0   | 278.1882          | [M-H] <sup>-</sup> 1 | 0.0              | C17 H26 O3                  | 219.1749, 112.9889         | 158                        | N/A      | 5.5     | 3115-49-9  | Industrial chemical   |
| Linoleic acid                                | 279.2329          | 13.7          | 10.4                                      | 155.5   | 96.9    | 23.9    | 280.2402          | [M-H] <sup>-</sup> 1 | -0.2             | C18 H32 O2                  | 261.2218, 245.2269         | 192                        | 230      | 6.25    | 60-33-3    | Natural product       |
| Triclosan                                    | 286.9440          | 13.0          | 6.3                                       | 51.5    | 276.8   | 36.1    | 287.9512          | [M-H] <sup>-</sup> 1 | 0.2              | C12 H7 Cl3 O2               | 183.17546, 80.91653        | 14                         | N/A      | 4.85    | 3380-34-5  | Pharmaceutical        |
| Coriolic acid                                | 295.2278          | 13.1          | 20.1                                      | 443.8   | 191.5   | 92.6    | 296.2351          | [M-H] <sup>-</sup> 1 | -0.1             | C18 H32 O3                  | 295.13675, 57.03394        | 122                        | N/A      | N/A     | 17290-79-8 | Industrial chemical   |
| Imazaquin                                    | 310.1201          | 11.8          | 5.7                                       | 20.4    | 15.0    | 342.8   | 311.1270          | [M-H] <sup>-</sup> 1 | 1.1              | C17 H17 N3 O3               | 217.01302, 183.01196       | 2                          | N/A      | 0.1     | 81335-37-7 | Pesticide             |
| Sucralose                                    | 395.0075          | 8.4           | 0.9                                       | 0.0     | 435.5   | 0.0     | 396.0146          | [M-H] <sup>-</sup> 1 | 0.8              | C12 H19 Cl3 O8              | 383.19266, 361.0385        | 3                          | N/A      | -0.5    | 56038-13-2 | Food additive         |
| Benzoic acid                                 | 121.0296          | 12.7          | 881.3                                     | 271.9   | 309.7   | 0.0     | 122.0368          | [M-H] <sup>-</sup> 1 | 0.5              | C7 H6 O2                    | 108.02184, 95.0183         | 45                         | 249.2    | 1.87    | 65-85-0    | Food additive         |
| Monobutyl Phthalate (MBP)                    | 221.0819          | 14.2          | 422.4                                     | 0.0     | 0.0     | 17.5    | 222.0892          | [M-H] <sup>-</sup> 1 | 0.1              | C12 H14 O4                  | 149.0971, 121.0290         | 635                        | N/A      | 2       | 131-70-4   | Industrial chemical   |

B.P. (°C), log Kow and Product ion (m/z) matching collected from PubChem database; ChemSpider database; EPA, 2011; Li Xie et al., 2021; Pandey et al. 2024

**Table S7** List of compounds at confidence level 4-5 and their properties

| Name                                     | Precursor ion m/z | Mean RT (min) | Average peak intensity (10 <sup>5</sup> ) |        |       |       | Neutral (Da) | Reference Ion        | Mass error (ppm) | B.P.(°C)             | log Kow | CAS NO      | Chemical formula | Category            |
|------------------------------------------|-------------------|---------------|-------------------------------------------|--------|-------|-------|--------------|----------------------|------------------|----------------------|---------|-------------|------------------|---------------------|
|                                          |                   |               | CPR                                       | PhR    | PIR   | UTR   |              |                      |                  |                      |         |             |                  |                     |
| Pantethine                               | 555.2530          | 9.6           | 16.6                                      | 20.3   | 33.4  | 14.5  | 554.2444     | [M+H] <sup>+</sup> 1 | 2.3              | 987.2                | -0.06   | 303-05-9    | C22 H42 N4 O8 S2 | Pharmaceutical      |
| Telmisartan                              | 515.2436          | 9.1           | 9.3                                       | 15.5   | 7.9   | 9.9   | 514.2369     | [M+H] <sup>+</sup> 1 | -1.14            | 771.9                | 8.42    | 144701-48-4 | C33 H30 N4 O2    | Pharmaceutical      |
| Acetildenafil                            | 467.2759          | 10.1          | 65.0                                      | 93.6   | 41.7  | 75.2  | 466.2692     | [M+H] <sup>+</sup> 1 | -1.31            | 760                  | N/A     | 831217-01-7 | C25 H34 N6 O3    | Pharmaceutical      |
| UV Absorber 234                          | 448.2379          | 9.8           | 2202.1                                    | 1251.2 | 701.2 | 531.5 | 447.2311     | [M+H] <sup>+</sup> 1 | -0.9             | 589.3                | 6.78    | 70321-86-7  | C30 H29 N3 O     | Industrial chemical |
| Irbesartan                               | 429.2377          | 12.0          | 0.0                                       | 0.0    | 0.0   | 350.2 | 428.2325     | [M+H] <sup>+</sup> 1 | -4.87            | 648.6                | 5.31    | 138402-11-6 | C25 H28 N6 O     | Pharmaceutical      |
| Cholic acid                              | 409.2941          | 10.8          | 0.0                                       | 0.0    | 18.2  | 77.2  | 408.2876     | [M+H] <sup>+</sup> 1 | -1.89            | 583.9                | 2.02    | 81-25-4     | C24 H40 O5       | Natural product     |
| Azoxystrobin                             | 404.1258          | 7.3           | 0.0                                       | 63.0   | 0.0   | 0.0   | 403.1168     | [M+H] <sup>+</sup> 1 | 4.11             | 581.3                | 2.5     | 131860-33-8 | C22 H17 N3 O5    | Pesticide           |
| Dexamethasone                            | 393.2070          | 9.3           | 17.7                                      | 963.8  | 20.7  | 94.0  | 392.1999     | [M+H] <sup>+</sup> 1 | -0.42            | 568.2                | 1.83    | 50-02-2     | C22 H29 F O5     | Pharmaceutical      |
| Bis-(2-ethylhexyl) phthalate             | 391.2829          | 10.2          | 82.9                                      | 94.5   | 157.8 | 208.9 | 390.2770     | [M+H] <sup>+</sup> 1 | -3.62            | 385                  | 7.5     | 117-81-7    | C24 H38 O4       | Industrial chemical |
| Pregnenolone acetate                     | 359.2571          | 10.4          | 354.8                                     | 84.8   | 15.9  | 114.7 | 358.2508     | [M+H] <sup>+</sup> 1 | -2.82            | 457.3                | 4.3     | 1778-02-5   | C23 H34 O3       | Pharmaceutical      |
| BISPHENOL A (2 3-DIHYDROXYPROPYL) GLYCID | 359.1836          | 18.8          | 6.2                                       | 90.5   | 5.7   | 6.3   | 358.1780     | [M+H] <sup>+</sup> 1 | -4.82            | 460                  | 3.4     | 76002-91-0  | C21 H26 O5       | Industrial chemical |
| Dicyclohexyl phthalate                   | 331.1888          | 18.8          | 17.7                                      | 219.4  | 6.1   | 6.8   | 330.1831     | [M+H] <sup>+</sup> 1 | -4.83            | 451.8                | 4.82    | 84-61-7     | C20 H26 O4       | Industrial chemical |
| Flutolanil                               | 324.1193          | 9.9           | 10.5                                      | 12.4   | 10.7  | 10.1  | 323.1133     | [M+H] <sup>+</sup> 1 | -3.95            | 420                  | 3.5     | 66332-96-5  | C17 H16 F3 N O2  | Pesticide           |
| Chlorpromazine                           | 319.1044          | 0.9           | 0.0                                       | 10.4   | 94.1  | 9.6   | 318.0958     | [M+H] <sup>+</sup> 1 | 3.98             | 400                  | 5.3     | 50-53-3     | C17 H19 Cl N2 S  | Pharmaceutical      |
| Brompheniramine                          | 319.0798          | 8.8           | 12.6                                      | 45.7   | 12.1  | 28.3  | 318.0732     | [M+H] <sup>+</sup> 1 | -2.12            | 380                  | 3.5     | 86-22-6     | C16 H19 Br N2    | Pharmaceutical      |
| Traversianal                             | 317.2100          | 9.6           | 191.6                                     | 243.4  | 129.4 | 260.7 | 316.2038     | [M+H] <sup>+</sup> 1 | -3.53            | 458.9                | N/A     | 108605-66-9 | C20 H28 O3       | Pesticide           |
| Progesterone                             | 315.2309          | 10.2          | 48.5                                      | 69.1   | 22.9  | 90.1  | 314.2246     | [M+H] <sup>+</sup> 1 | -3.11            | 537.7                | 3.87    | 57-83-0     | C21 H30 O2       | Pharmaceutical      |
| L-Glutamic acid                          | 313.0694          | 9.7           | 11.4                                      | 35.3   | 13.1  | 23.7  | 312.0634     | [M+H] <sup>+</sup> 1 | -4.22            | 215                  | -3.22   | 56-86-0     | C17 H12 O6       | Food additive       |
| Sclareol                                 | 309.2776          | 10.4          | 13.6                                      | 46.2   | 13.4  | 22.7  | 308.2715     | [M+H] <sup>+</sup> 1 | -4.06            | 218–220 (at 19 mmHg) | N/A     | 515-03-7    | C20 H36 O2       | Natural product     |
| Betaxolol                                | 308.2207          | 9.1           | 31.2                                      | 51.4   | 51.8  | 28.2  | 307.2147     | [M+H] <sup>+</sup> 1 | -4.17            | 448 (at 760 mmHg)    | 2.78    | 63659-18-7  | C18 H29 N O3     | Pharmaceutical      |
| Tolnaftate                               | 308.1112          | 8.3           | 35.6                                      | 166.1  | 18.1  | 31.0  | 307.1031     | [M+H] <sup>+</sup> 1 | 2.63             | 437.6                | 5.3     | 2398-96-1   | C19 H17 N O S    | Pesticide           |

| Name                                                                      | Precursor ion m/z | Mean RT (min) | Average peak intensity (10 <sup>5</sup> ) |        |       |        | Neutral (Da) | Reference Ion          | Mass error (ppm) | B.P.(°C)               | log Kow | CAS NO      | Chemical formula  | Category              |
|---------------------------------------------------------------------------|-------------------|---------------|-------------------------------------------|--------|-------|--------|--------------|------------------------|------------------|------------------------|---------|-------------|-------------------|-----------------------|
|                                                                           |                   |               | CPR                                       | PhR    | PIR   | UTR    |              |                        |                  |                        |         |             |                   |                       |
| cis-3-(2,5-Dimethylphenyl)-4-hydroxy-8-methoxy-1-azaspiro[4.5]decan-2-one | 304.1894          | 9.2           | 37.8                                      | 21.3   | 15.3  | 31.2   | 303.1834     | [M+H] <sup>+</sup> 1   | -4.28            | 521.4 (at 760 mmHg)    | 3.31    | 203312-38-3 | C18 H25 N O3      | Pesticide             |
| 11-Keto-testosterone                                                      | 303.1941          | 9.3           | 212.6                                     | 309.6  | 109.6 | 225.7  | 302.1882     | [M+H] <sup>+</sup> 1   | -4.5             | 476.8                  | 3.61    | 564-35-2    | C19 H26 O3        | Natural product       |
| Phenmedipham                                                              | 301.1185          | 9.6           | 16.2                                      | 21.4   | 14.8  | 18.2   | 300.1110     | [M+H] <sup>+</sup> 1   | 0.69             | 81.6                   | N/A     | 13684-63-4  | C16 H16 N2 O4     | Pesticide             |
| Quinalphos                                                                | 299.0611          | 8.7           | 12.0                                      | 42.6   | 30.0  | 13.6   | 298.0541     | [M+H] <sup>+</sup> 1   | -0.88            | 142                    | 4.4     | 13593-03-8  | C12 H15 N2 O3 P S | Pesticide             |
| Cryptotanshinone                                                          | 297.1471          | 9.7           | 288.4                                     | 62.5   | 26.1  | 133.5  | 296.1412     | [M+H] <sup>+</sup> 1   | -4.8             | 459 ± 45 (at 760 mmHg) | 4.4     | 35825-57-1  | C19 H20 O3        | Natural product       |
| Tanshinone II                                                             | 295.1316          | 9.5           | 10.7                                      | 14.9   | 10.3  | 44.6   | 294.1256     | [M+H] <sup>+</sup> 1   | -4.22            | 480.7 (at 760 mmHg)    | 4.4     | 568-72-9    | C19 H18 O3        | Natural product       |
| Tutin                                                                     | 295.1164          | 18.8          | 9.4                                       | 77.3   | 0.0   | 9.4    | 294.1103     | [M+H] <sup>+</sup> 1   | -3.97            | 356.07                 | -0.36   | 2571-22-4   | C15 H18 O6        | Natural product       |
| Paclitaxel                                                                | 294.1353          | 9.9           | 46.1                                      | 14.6   | 12.8  | 12.2   | 293.1295     | [M+H] <sup>+</sup> 1   | -4.98            | 460.9 ± 55.0           | 3.2     | 76738-62-0  | C15 H20 Cl N3 O   | Pesticide             |
| BENZYL-DIPHENYLPHOSPHINE OXIDE                                            | 293.1100          | 7.7           | 16.3                                      | 118.5  | 18.2  | 34.1   | 292.1017     | [M+H] <sup>+</sup> 1   | 3.48             | 399                    | N/A     | 2959-74-2   | C19 H17 O P       | Industrial chemical   |
| 2-(2-Ethoxyethoxy)ethanol                                                 | 291.1790          | 0.5           | 11.4                                      | 16.9   | 21.4  | 45.6   | 134.0943     | [2M+Na] <sup>+</sup> 1 | 0.7              | 196–202                | -0.54   | 111-90-0    | C6 H14 O3         | Personal care product |
| Androstenedione                                                           | 287.1995          | 9.3           | 35.3                                      | 52.5   | 20.2  | 54.8   | 286.1933     | [M+H] <sup>+</sup> 1   | -3.67            | 431.4                  | 2.75    | 63-05-8     | C19 H26 O2        | Pharmaceutical        |
| Metominostrobin                                                           | 285.1241          | 10.0          | 14.7                                      | 18.2   | 14.1  | 14.4   | 284.1161     | [M+H] <sup>+</sup> 1   | 2.57             | N/A                    | N/A     | 133408-50-1 | C16 H16 N2 O3     | Pesticide             |
| Bis(2-methoxyethyl) phthalate                                             | 283.1165          | 8.7           | 3432.6                                    | 1823.5 | 932.7 | 3582.5 | 282.1103     | [M+H] <sup>+</sup> 1   | -3.74            | 340                    | 2.9     | 117-82-8    | C14 H18 O6        | Industrial chemical   |
| Cycloheximide                                                             | 282.1691          | 0.8           | 14.4                                      | 63.1   | 256.5 | 779.6  | 281.1627     | [M+H] <sup>+</sup> 1   | -3.37            | N/A                    | N/A     | 66-81-9     | C15 H23 N O4      | Pharmaceutical        |
| L-Aspartyl-L-Phenylalanine                                                | 281.1120          | 8.0           | 106.4                                     | 253.4  | 34.3  | 68.9   | 280.1059     | [M+H] <sup>+</sup> 1   | -4.21            | 528.4 ± 60.0           | 1.79    | 13433-09-5  | C13 H16 N2 O5     | Food additive         |
| Metolachlor OA                                                            | 280.1532          | 7.6           | 63.8                                      | 68.5   | 15.1  | 63.9   | 279.1471     | [M+H] <sup>+</sup> 1   | -3.98            | 100                    | N/A     | 152019-73-3 | C15 H21 N O4      | Pesticide             |
| Shogaol                                                                   | 277.1787          | 18.6          | 0.0                                       | 134.8  | 0.0   | 0.0    | 276.1725     | [M+H] <sup>+</sup> 1   | -4.01            | 427.5                  | N/A     | 23513-13-5  | C17 H24 O3        | Natural product       |
| Dihydromethysticin                                                        | 277.1061          | 9.2           | 82.8                                      | 88.2   | 62.9  | 95.2   | 276.0998     | [M+H] <sup>+</sup> 1   | -3.5             | 476.1                  | N/A     | 19902-91-1  | C15 H16 O5        | Pharmaceutical        |
| Nandrolone                                                                | 275.1996          | 9.6           | 120.7                                     | 205.0  | 148.2 | 163.3  | 274.1933     | [M+H] <sup>+</sup> 1   | -3.35            | ~357.4 (estimated)     | ~3.00   | 434-22-0    | C18 H26 O2        | Pharmaceutical        |
| Nitenpyram                                                                | 271.0952          | 9.4           | 98.5                                      | 26.1   | 32.1  | 89.1   | 270.0884     | [M+H] <sup>+</sup> 1   | -1.5             | N/A                    | N/A     | 150824-47-8 | C11 H15 Cl N4 O2  | Pesticide             |
| Metoprolol                                                                | 268.1896          | 9.8           | 114.2                                     | 201.2  | 0.0   | 103.2  | 267.1834     | [M+H] <sup>+</sup> 1   | -3.78            | 398.6 (at 760 mmHg)    | 1.79    | 37350-58-6  | C15 H25 N O3      | Pharmaceutical        |
| Tributyl phosphate                                                        | 267.1733          | 10.5          | 0.0                                       | 12.6   | 18.9  | 26.7   | 266.1647     | [M+H] <sup>+</sup> 1   | 4.93             | 289                    | N/A     | 126-73-8    | C12 H27 O4 P      | Industrial chemical   |
| Albendazole                                                               | 266.0950          | 9.8           | 12.4                                      | 15.2   | 36.9  | 12.9   | 265.0885     | [M+H] <sup>+</sup> 1   | -3.01            | N/A                    | N/A     | 54965-21-8  | C12 H15 N3 O2 S   | Pharmaceutical        |

| Name                                                     | Precursor ion m/z | Mean RT (min) | Average peak intensity (10 <sup>5</sup> ) |        |       |        | Neutral (Da) | Reference Ion        | Mass error (ppm) | B.P.(°C) | log Kow | CAS NO      | Chemical formula | Category            |
|----------------------------------------------------------|-------------------|---------------|-------------------------------------------|--------|-------|--------|--------------|----------------------|------------------|----------|---------|-------------|------------------|---------------------|
|                                                          |                   |               | CPR                                       | PhR    | PIR   | UTR    |              |                      |                  |          |         |             |                  |                     |
| Phebalosin                                               | 259.0956          | 9.9           | 81.3                                      | 22.9   | 116.5 | 45.2   | 258.0892     | [M+H] <sup>+</sup> 1 | -3.33            | 418.8    | N/A     | 6545-99-9   | C15 H14 O4       | Pharmaceutical      |
| dextrophan                                               | 258.1846          | 8.3           | 14.8                                      | 151.9  | 149.0 | 37.0   | 257.1780     | [M+H] <sup>+</sup> 1 | -2.44            | 229–232  | 2.9     | 125-71-3    | C17 H23 N O      | Pharmaceutical      |
| 1-(2,4-Dichlorophenyl)-2-(1,2,4-triazol-1-yl)ethanol     | 258.0187          | 9.4           | 386.5                                     | 20.3   | 13.4  | 16.1   | 257.0123     | [M+H] <sup>+</sup> 1 | -3.18            | N/A      | 2.1     | 79017-06-0  | C10 H9 Cl2 N3 O  | Pesticide           |
| Pterostilbene                                            | 257.1164          | 9.4           | 98.8                                      | 84.4   | 26.8  | 364.2  | 256.1099     | [M+H] <sup>+</sup> 1 | -3.3             | ~420     | 3.6     | 537-42-8    | C16 H16 O3       | Natural product     |
| Diphenyl phosphate                                       | 251.0476          | 8.8           | 13.4                                      | 45.5   | 11.3  | 48.7   | 250.0395     | [M+H] <sup>+</sup> 1 | 3.24             | 280      | 4.1     | 115-86-6    | C12 H11 O4 P     | Industrial chemical |
| 3-(4-hydroxy-5-oxo-3-phenyl-2H-furan-2-yl)propanoic acid | 249.0749          | 8.4           | 128.8                                     | 202.4  | 100.1 | 128.9  | 248.0685     | [M+H] <sup>+</sup> 1 | -3.6             | N/A      | N/A     | 105364-56-5 | C13 H12 O5       | Pharmaceutical      |
| Suberosin                                                | 245.1163          | 9.6           | 987.1                                     | 1000.1 | 506.8 | 1227.9 | 244.1099     | [M+H] <sup>+</sup> 1 | -3.76            | 393.3    | N/A     | 18942-62-0  | C15 H16 O3       | Natural product     |
| Eleutherol                                               | 245.0799          | 9.5           | 28.6                                      | 18.1   | 42.5  | 60.0   | 244.0736     | [M+H] <sup>+</sup> 1 | -3.99            | N/A      | N/A     | 574-84-5    | C14 H12 O4       | Pesticide           |
| Cyanazine                                                | 241.0967          | 9.8           | 19.4                                      | 26.5   | 18.5  | 25.9   | 240.0890     | [M+H] <sup>+</sup> 1 | 1.68             | N/A      | 2.3     | 21725-46-2  | C9 H13 Cl N6     | Pesticide           |
| Costunolide                                              | 233.1526          | 18.6          | 73.0                                      | 116.5  | 55.1  | 118.0  | 232.1463     | [M+H] <sup>+</sup> 1 | -4.53            | N/A      | 2.6     | 553-21-9    | C15 H20 O2       | Pharmaceutical      |
| osthenol                                                 | 231.1007          | 9.2           | 1052.2                                    | 1002.6 | 430.7 | 1035.0 | 230.0943     | [M+H] <sup>+</sup> 1 | -3.88            | N/A      | N/A     | 481-46-9    | C14 H14 O3       | Natural product     |
| Pteleine                                                 | 230.0802          | 9.1           | 107.8                                     | 145.6  | 110.1 | 135.8  | 229.0739     | [M+H] <sup>+</sup> 1 | -4.35            | N/A      | N/A     | 477-90-7    | C13 H11 N O3     | Natural product     |
| Bisphenol A                                              | 229.1214          | 9.7           | 598.7                                     | 1036.7 | 238.1 | 1383.7 | 228.1150     | [M+H] <sup>+</sup> 1 | -4.12            | 220–250  | 3.3     | 80-05-7     | C15 H16 O2       | Industrial chemical |
| cis-Resveratrol                                          | 229.0851          | 9.2           | 160.9                                     | 90.5   | 19.4  | 183.3  | 228.0786     | [M+H] <sup>+</sup> 1 | -3.75            | N/A      | 3.1     | 501-36-0    | C14 H12 O3       | Natural product     |
| Dicyclohexylurea                                         | 225.1950          | 19.0          | 5.2                                       | 24.0   | 24.5  | 22.8   | 224.1889     | [M+H] <sup>+</sup> 1 | -4.91            | N/A      | 4.2     | 101-83-7    | C13 H24 N2 O     | Industrial chemical |
| Bufexamac                                                | 224.1270          | 3.7           | 20.3                                      | 37.3   | 0.0   | 6.1    | 223.1208     | [M+H] <sup>+</sup> 1 | -4.98            | N/A      | 3.1     | 2438-72-4   | C12 H17 N O3     | Pharmaceutical      |
| Mexacarbate                                              | 223.1430          | 7.6           | 259.9                                     | 57.6   | 29.0  | 159.3  | 222.1368     | [M+H] <sup>+</sup> 1 | -4.82            | N/A      | 2.7     | 315-18-4    | C12 H18 N2 O2    | Pesticide           |
| Carbofuran                                               | 222.1114          | 18.7          | 7.4                                       | 232.9  | 127.6 | 145.1  | 221.1052     | [M+H] <sup>+</sup> 1 | -4.85            | 170–172  | 2.3     | 1563-66-2   | C12 H15 N O3     | Pesticide           |
| Pterosin B                                               | 219.1369          | 7.9           | 10.8                                      | 6131.8 | 18.6  | 288.9  | 218.1307     | [M+H] <sup>+</sup> 1 | -4.94            | N/A      | N/A     | 10440-05-4  | C14 H18 O2       | Natural product     |
| Pyracarbolid                                             | 218.1165          | 9.0           | 231.6                                     | 105.3  | 126.6 | 299.8  | 217.1103     | [M+H] <sup>+</sup> 1 | -4.75            | N/A      | N/A     | 34622-58-7  | C13 H15 N O2     | Pesticide           |
| Imidacloprid urea                                        | 212.0588          | 7.3           | 84.4                                      | 46.6   | 10.7  | 15.3   | 211.0512     | [M+H] <sup>+</sup> 1 | 1.22             | N/A      | N/A     | 155584-75-7 | C9 H10 Cl N3 O   | Pesticide           |
| Desnitro-imidacloprid                                    | 211.0741          | 9.6           | 79.3                                      | 122.0  | 30.5  | 83.3   | 210.0672     | [M+H] <sup>+</sup> 1 | -1.71            | N/A      | N/A     | 135410-20-7 | C9 H11 Cl N4     | Pesticide           |
| Dexibuprofen                                             | 207.1370          | 9.9           | 435.6                                     | 700.0  | 271.7 | 657.2  | 206.1307     | [M+H] <sup>+</sup> 1 | -4.56            | 157–158  | 3.5     | 51146-56-6  | C13 H18 O2       | Pharmaceutical      |

| Name                                        | Precursor ion m/z | Mean RT (min) | Average peak intensity (10 <sup>5</sup> ) |        |        |        | Neutral (Da) | Reference Ion        | Mass error (ppm) | B.P.(°C) | log Kow | CAS NO     | Chemical formula | Category              |
|---------------------------------------------|-------------------|---------------|-------------------------------------------|--------|--------|--------|--------------|----------------------|------------------|----------|---------|------------|------------------|-----------------------|
|                                             |                   |               | CPR                                       | PhR    | PIR    | UTR    |              |                      |                  |          |         |            |                  |                       |
| 5,7-Dimethoxycoumarin                       | 207.0642          | 0.5           | 0.0                                       | 6.4    | 4.6    | 3.9    | 206.0579     | [M+H] <sup>+</sup> 1 | -4.73            | N/A      | N/A     | 531-59-9   | C11 H10 O4       | Pharmaceutical        |
| Monuron                                     | 199.0635          | 7.0           | 4.8                                       | 9.3    | 5.1    | 12.4   | 198.0560     | [M+H] <sup>+</sup> 1 | 1.13             | 180-182  | 2.1     | 150-68-5   | C9 H11 Cl N2 O   | Pesticide             |
| 7-Methoxy-4-methylcoumarin                  | 191.0693          | 8.4           | 146.4                                     | 168.5  | 17.3   | 50.3   | 190.0630     | [M+H] <sup>+</sup> 1 | -4.94            | N/A      | N/A     | 121-33-5   | C11 H10 O3       | Natural product       |
| Benzo[g]quinoline                           | 180.0799          | 6.7           | 22.3                                      | 565.1  | 225.4  | 417.0  | 179.0735     | [M+H] <sup>+</sup> 1 | -4.76            | N/A      | N/A     | 85-02-9    | C13 H9 N         | Industrial chemical   |
| 5-Phenylvaleric acid                        | 179.1059          | 11.9          | 0.0                                       | 146.7  | 0.0    | 0.0    | 178.0994     | [M+H] <sup>+</sup> 1 | -4.21            | N/A      | N/A     | 45508      | C11 H14 O2       | Natural product       |
| Deisopropylatrazine                         | 174.0538          | 8.1           | 23.3                                      | 126.1  | 18.9   | 120.3  | 173.0468     | [M+H] <sup>+</sup> 1 | -1.51            | N/A      | N/A     | 6190-65-4  | C5 H8 Cl N5      | Pesticide             |
| Propenoic acid 2-(dimethylamino)ethyl ester | 144.1010          | 8.9           | 18.6                                      | 53.5   | 17.8   | 34.3   | 143.0946     | [M+H] <sup>+</sup> 1 | -4.42            | N/A      | N/A     | 105-63-5   | C7 H13 N O2      | Industrial chemical   |
| Butyl acrylate                              | 129.0904          | 14.2          | 0.0                                       | 170.9  | 0.0    | 0.0    | 128.0837     | [M+H] <sup>+</sup> 1 | -4.82            | 145      | 2.3     | 141-32-2   | C7 H12 O2        | Industrial chemical   |
| Naphthalene                                 | 129.0693          | 9.5           | 35.9                                      | 56.6   | 22.0   | 87.8   | 128.0626     | [M+H] <sup>+</sup> 1 | -4.84            | 218      | 3.3     | 91-20-3    | C10 H8           | Industrial chemical   |
| Nitrobenzene                                | 124.0388          | 5.6           | 0.0                                       | 0.0    | 1192.3 | 0.0    | 123.0320     | [M+H] <sup>+</sup> 1 | -4.49            | 210.9    | 1.85    | 98-95-3    | C6 H5 N O2       | Industrial chemical   |
| 2-Isobutoxyethanol                          | 119.1062          | 3.7           | 13.3                                      | 8.6    | 0.0    | 0.0    | 118.0994     | [M+H] <sup>+</sup> 1 | -2.5             | N/A      | N/A     | 14634-35-6 | C6 H14 O2        | Industrial chemical   |
| 2-Hydroxyethyl acrylate                     | 117.0542          | 7.7           | 0.0                                       | 197.3  | 0.0    | 97.2   | 116.0473     | [M+H] <sup>+</sup> 1 | -3.76            | 213      | 0.47    | 818-61-1   | C5 H8 O3         | Industrial chemical   |
| 2-Aminophenol                               | 110.0598          | 8.5           | 1456.6                                    | 0.0    | 791.4  | 1081.6 | 109.0528     | [M+H] <sup>+</sup> 1 | -2.67            | 174      | 0.62    | 95-55-6    | C6 H7 N O        | Industrial chemical   |
| Ethyl acrylate                              | 101.0595          | 5.6           | 0.0                                       | 2849.6 | 2095.1 | 3468.2 | 100.0524     | [M+H] <sup>+</sup> 1 | -2.55            | 99.4     | 1.2     | 140-88-5   | C5 H8 O2         | Industrial chemical   |
| Methyl acrylate                             | 87.0438           | 8.0           | 0.0                                       | 696.2  | 3659.1 | 732.8  | 86.0368      | [M+H] <sup>+</sup> 1 | -2.52            | 80       | 0.73    | 96-33-3    | C4 H6 O2         | Industrial chemical   |
| Acetone Cyanohydrin                         | 86.0598           | 2.1           | 110.7                                     | 130.1  | 0.0    | 151.6  | 85.0528      | [M+H] <sup>+</sup> 1 | -2.94            | 120      | -0.2    | 75-86-5    | C4 H7 N O        | Industrial chemical   |
| Cyclohexane                                 | 85.1010           | 20.1          | 12.8                                      | 5.5    | 34.4   | 18.0   | 84.0939      | [M+H] <sup>+</sup> 1 | 0.05             | 80.7     | 3.4     | 110-82-7   | C6 H12           | Pesticide             |
| 1,3-Dioxolane                               | 75.0439           | 8.6           | 0.0                                       | 70.1   | 0.0    | 39.4   | 74.0368      | [M+H] <sup>+</sup> 1 | -2.14            | 74       | -0.37   | 646-06-0   | C3 H6 O2         | Pharmaceutical        |
| Acrylic acid                                | 73.0282           | 3.8           | 0.0                                       | 617.2  | 0.0    | 466.9  | 72.0211      | [M+H] <sup>+</sup> 1 | -2.46            | 141      | 0.35    | 79-10-7    | C3 H4 O2         | Industrial chemical   |
| Isoprene                                    | 69.0698           | 20.1          | 270.8                                     | 439.8  | 968.5  | 397.3  | 68.0626      | [M+H] <sup>+</sup> 1 | -1.16            | 34       | 2.42    | 78-79-5    | C5 H8            | Industrial chemical   |
| Ethanolamine                                | 62.0601           | 1.3           | 12.7                                      | 0.0    | 0.0    | 0.0    | 61.0528      | [M+H] <sup>+</sup> 1 | 1.13             | 170      | -1.31   | 141-43-5   | C2 H7 N O        | Personal care product |
| 1,3-Butadiene                               | 55.0545           | 16.2          | 83.9                                      | 0.0    | 81.5   | 0.0    | 54.0470      | [M+H] <sup>+</sup> 1 | 3.5              | -4.4     | 1.99    | 106-99-0   | C4 H6            | Industrial chemical   |
| Acesulfame                                  | 161.9867          | 2.1           | 1.1                                       | 49.8   | 45.6   | 98.0   | 162.9939     | [M-H] <sup>-</sup> 1 | 0.45             | N/A      | -1.3    | 33665-90-6 | C4 H5 N O4 S     | Food additive         |

| Name                                 | Precursor ion m/z | Mean RT (min) | Average peak intensity (10 <sup>5</sup> ) |       |       |       | Neutral (Da) | Reference Ion | Mass error (ppm) | B.P.(°C) | log Kow | CAS NO       | Chemical formula     | Category              |
|--------------------------------------|-------------------|---------------|-------------------------------------------|-------|-------|-------|--------------|---------------|------------------|----------|---------|--------------|----------------------|-----------------------|
|                                      |                   |               | CPR                                       | PhR   | PIR   | UTR   |              |               |                  |          |         |              |                      |                       |
| Decanoic acid                        | 171.1390          | 12.8          | 2.3                                       | 1.3   | 1.3   | 15.4  | 172.1463     | [M-H]-1       | -0.07            | 268      | 4.09    | 334-48-5     | C10 H20 O2           | Industrial chemical   |
| Benzotrichloride                     | 192.9384          | 12.5          | 2.9                                       | 16.4  | 2.8   | 28.1  | 193.9457     | [M-H]-1       | 0.14             | 213      | 3.3     | 98-07-7      | C7 H5 Cl3            | Pesticide             |
| dinotefuran                          | 201.0995          | 9.4           | 2.5                                       | 2.4   | 50.9  | 2.8   | 202.1066     | [M-H]-1       | 1.12             | 136      | -0.55   | 165252-70-0  | C7 H14 N4 O3         | Pesticide             |
| 3,4-Dichlorophenylurea               | 202.9786          | 11.9          | 1.1                                       | 3.7   | 8.1   | 14.3  | 203.9857     | [M-H]-1       | 0.53             | N/A      | N/A     | 101-20-2     | C7 H6 Cl2 N2 O       | Pesticide             |
| Mecoprop                             | 213.0326          | 9.8           | 1.1                                       | 0.6   | 1.5   | 1.8   | 214.0397     | [M-H]-1       | 0.78             | 200      | 2.8     | 93-65-2      | C10 H11 Cl O3        | Pesticide             |
| Clofibric acid                       | 213.0327          | 9.4           | 1.7                                       | 1.7   | 154.9 | 2.0   | 214.0397     | [M-H]-1       | 1.51             | 242      | 2.4     | 882-09-7     | C10 H11 Cl O3        | Pharmaceutical        |
| N-Demethoxylinuron                   | 216.9940          | 12.1          | 638.2                                     | 7.4   | 75.9  | 18.8  | 218.0014     | [M-H]-1       | -0.26            | N/A      | N/A     | 330-55-2     | C8 H8 Cl2 N2 O       | Pesticide             |
| Genistein                            | 269.0457          | 12.4          | 2.6                                       | 4.2   | 10.5  | 28.1  | 270.0528     | [M-H]-1       | 0.43             | 482      | 2.9     | 446-72-0     | C15 H10 O5           | Natural product       |
| Mianserin N-oxide                    | 279.1506          | 13.0          | 14.5                                      | 3.9   | 5.1   | 29.4  | 280.1576     | [M-H]-1       | 0.96             | N/A      | N/A     | 24219-97-4   | C18 H20 N2 O         | Pharmaceutical        |
| Benomyl                              | 289.1296          | 10.0          | 60.9                                      | 212.1 | 73.9  | 108.9 | 290.1379     | [M-H]-1       | -3.36            | 325      | 1.5     | 17804-35-2   | C14 H18 N4 O3        | Pesticide             |
| Tetradecyl sulfate                   | 293.1779          | 12.9          | 6.9                                       | 41.9  | 36.9  | 43.4  | 294.1865     | [M-H]-1       | -4.33            | N/A      | N/A     | 1191-50-0    | C14 H30 O4 S         | Industrial chemical   |
| Ricinoleic acid                      | 297.2435          | 11.2          | 3.8                                       | 28.3  | 495.0 | 178.1 | 298.2508     | [M-H]-1       | 0.06             | 313      | 4       | 141-22-0     | C18 H34 O3           | Industrial chemical   |
| Perfluorobutane sulfonic acid (PFBS) | 298.9431          | 13.5          | 16.3                                      | 4.4   | 4.8   | 35.7  | 299.9503     | [M-H]-1       | 0.41             | N/A      | N/A     | 375-73-5     | C4 H F9 O3 S         | Industrial chemical   |
| sulisobenzene                        | 307.0284          | 11.3          | 1.5                                       | 11.3  | 82.3  | 45.2  | 308.0355     | [M-H]-1       | 0.59             | 360      | 2.3     | 4065-45-6    | C14 H12 O6 S         | Pharmaceutical        |
| Triclocarban                         | 312.9709          | 12.9          | 4.8                                       | 2.5   | 2.2   | 27.3  | 313.9781     | [M-H]-1       | 0.26             | 250      | 4.9     | 101-20-2     | C13 H9 Cl3 N2 O      | Personal care product |
| Maltose                              | 341.1076          | 9.8           | 2.3                                       | 0.7   | 3.0   | 6.4   | 342.1162     | [M-H]-1       | -3.83            | N/A      | -3.7    | 69-79-4      | C12 H22 O11          | Food additive         |
| Fipronil-desulfinyl                  | 386.9649          | 12.4          | 2.2                                       | 3.1   | 11.7  | 24.4  | 387.9717     | [M-H]-1       | 1.26             | N/A      | N/A     | 205650-65-3  | C12 H4 Cl2 F6 N4     | Pesticide             |
| Fipronil sulfide                     | 418.9369          | 14.4          | 6.1                                       | 1.6   | 2.2   | 9.0   | 419.9438     | [M-H]-1       | 0.96             | N/A      | N/A     | 120068-37-3  | C12 H4 Cl2 F6 N4 S   | Pesticide             |
| Fipronil                             | 434.9316          | 12.5          | 3.6                                       | 3.9   | 27.1  | 36.2  | 435.9387     | [M-H]-1       | 0.43             | 200      | 4       | 120068-37-3  | C12 H4 Cl2 F6 N4 O S | Pesticide             |
| 1-Palmitoylcephalin                  | 452.2784          | 13.3          | 8.6                                       | 19.0  | 17.2  | 25.5  | 453.2855     | [M-H]-1       | 0.38             | N/A      | N/A     | 65172-31-2   | C21 H44 N O7 P       | Pharmaceutical        |
| Andrastin A                          | 485.2543          | 14.5          | 766.5                                     | 43.5  | 39.9  | 140.5 | 486.2618     | [M-H]-1       | -0.36            | N/A      | N/A     | 1000385-21-2 | C28 H38 O7           | Natural product       |
| Novaluron                            | 491.0041          | 13.1          | 5.4                                       | 2.1   | 2.1   | 22.0  | 492.0123     | [M-H]-1       | -1.85            | 500      | 5.3     | 116714-46-6  | C17 H9 Cl F8 N2 O4   | Pesticide             |

| Name                                      | Precursor ion m/z | Mean RT (min) | Average peak intensity (10 <sup>5</sup> ) |      |       |       | Neutral (Da) | Reference Ion        | Mass error (ppm) | B.P.(°C) | log Kow | CAS NO    | Chemical formula                                               | Category              |
|-------------------------------------------|-------------------|---------------|-------------------------------------------|------|-------|-------|--------------|----------------------|------------------|----------|---------|-----------|----------------------------------------------------------------|-----------------------|
|                                           |                   |               | CPR                                       | PhR  | PIR   | UTR   |              |                      |                  |          |         |           |                                                                |                       |
| Heptadecafluorooctanesulfonic Acid        | 498.9304          | 12.8          | 6.3                                       | 15.0 | 12.6  | 50.4  | 499.9375     | [M-H]-1              | 0.41             | N/A      | 4.49    | 1763-23-1 | C <sub>8</sub> H <sub>9</sub> F <sub>17</sub> O <sub>3</sub> S | Industrial chemical   |
| Methyl 2,4-Dihydroxy-3,6-Dimethylbenzoate | 197.0799          | 8.8           | 235.8                                     | 52.9 | 229.3 | 378.8 | 196.0736     | [M+H] <sup>+</sup> 1 | -4.7             | 360.7    | 2.6     | 4707-47-5 | C <sub>10</sub> H <sub>12</sub> O <sub>4</sub>                 | Personal care product |
| Monobenzyl Phthalate (MP)                 | 255.0663          | 12.5          | 5.6                                       | 5.3  | 24.4  | 50.1  | 256.0736     | [M-H]-1              | 0.1              | 359.5    | 1.06    | 2528-16-7 | C <sub>15</sub> H <sub>12</sub> O <sub>4</sub>                 | Industrial chemical   |

B.P. (°C) and log Kow collected from PubChem database; ChemSpider database; EPA, 2011; Li Xie et al., 2021

**Table S8** PNEC concentrations in each compound

| No. | Category       | Name                           | Category       | Formula         | PNEC concentration (µg/L) | Reference |
|-----|----------------|--------------------------------|----------------|-----------------|---------------------------|-----------|
| 1   | Pharmaceutical | Bentazone                      | Pharmaceutical | C10 H12 N2 O3 S | 270                       | 7         |
| 2   |                | Lidocaine                      | Pharmaceutical | C14 H22 N2 O    | 8.20                      | 8         |
| 3   |                | Primidone                      | Pharmaceutical | C12 H14 N2 O2   | 9.30                      | ECOTOX    |
| 4   |                | Sulfadiazine                   | Pharmaceutical | C10 H10 N4 O2 S | 1.35                      | 9         |
| 5   |                | Trimethoprim                   | Pharmaceutical | C14 H18 N4 O3   | 1.00                      | 10        |
| 6   |                | Mefenamic acid                 | Pharmaceutical | C15 H15 N O2    | 0.428                     | 11        |
| 7   |                | Ciprofloxacin                  | Pharmaceutical | C17 H18 F N3 O3 | 0.100                     | 9         |
| 8   |                | Venlafaxine                    | Pharmaceutical | C17 H27 N O2    | 0.092                     | 9         |
| 9   |                | 17beta-Trenbolone              | Pharmaceutical | C18 H22 O2      | 0.078                     | 12        |
| 10  |                | Spiroxamine                    | Pharmaceutical | C18 H35 N O2    | 0.020                     | 7         |
| 11  |                | Tramadol                       | Pharmaceutical | C16 H25 N O2    | 0.007                     | 13        |
| 12  |                | 17beta-Estradiol               | Pharmaceutical | C18 H24 O2      | 0.002                     | 14        |
| 13  | Pesticide      | Metalaxyl                      | Pesticide      | C15 H21 N O4    | 120                       | 7         |
| 14  |                | Pretilachlor                   | Pesticide      | C17 H26 Cl N O2 | 32.0                      | 6         |
| 15  |                | Dinoterb                       | Pesticide      | C10 H12 N2 O5   | 18.60                     | 15        |
| 16  |                | 2,4-Dinitrophenol              | Pesticide      | C6 H4 N2 O5     | 4.00                      | ECOTOX    |
| 17  |                | 2,4-Dichlorophenoxyacetic acid | Pesticide      | C8 H6 Cl2 O3    | 1.30                      | 16        |
| 18  |                | Tebuconazole                   | Pesticide      | C16 H22 Cl N3 O | 0.578                     | 7         |
| 19  |                | Acetamiprid                    | Pesticide      | C10 H11 Cl N4   | 0.500                     | 6         |
| 20  |                | Diuron                         | Pesticide      | C9 H10 Cl2 N2 O | 0.320                     | ECOTOX    |
| 21  |                | Terbuthylazine                 | Pesticide      | C9 H16 Cl N5    | 0.224                     | 17        |
| 22  |                | Lenacil                        | Pesticide      | C13 H18 N2 O2   | 0.170                     | 17        |

|    |                       |                               |                       |                   |       |        |
|----|-----------------------|-------------------------------|-----------------------|-------------------|-------|--------|
| 23 |                       | Clomazone                     | Pesticide             | C12 H14 Cl N O2   | 0.167 | ECOTOX |
| 24 |                       | Thiamethoxam                  | Pesticide             | C8 H10 Cl N5 O3 S | 0.140 | 7      |
| 25 |                       | Ametryn                       | Pesticide             | C9 H17 N5 S       | 0.100 | 7      |
| 26 |                       | Hexazinone                    | Pesticide             | C12 H20 N4 O2     | 0.048 | 7      |
| 27 |                       | Imidacloprid                  | Pesticide             | C9 H10 Cl N5 O2   | 0.008 | 7      |
| 28 |                       | Buprofezin                    | Pesticide             | C16 H23 N3 O S    | 0.003 | ECOTOX |
| 29 |                       | Triazophos                    | Pesticide             | C12 H16 N3 O3 P S | 0.003 | 18     |
| 30 | Personal care product | Butylparaben                  | Personal care product | C11 H14 O3        | 20.1  | 19     |
| 31 |                       | Galaxolidone                  | Personal care product | C18 H24 O2        | 18.4  | 20     |
| 32 |                       | Stearic acid                  | Personal care product | C18 H36 O2        | 1.50  | 21     |
| 33 |                       | Propylparaben                 | Personal care product | C10 H12 O3        | 1.00  | 22     |
| 34 | Industrial chemical   | Lauryl sulfate                | Industrial chemical   | C12 H26 O4 S      | 137   | ECOTOX |
| 35 |                       | Terephthalic acid             | Industrial chemical   | C8 H6 O4          | 380   | ECOTOX |
| 36 |                       | Perfluorooctanoic acid (PFOA) | Industrial chemical   | C8 H F15 O2       | 18.7  | 23     |
| 37 |                       | Benzyl butyl phthalate        | Industrial chemical   | C19 H20 O4        | 3.30  | 24     |
| 38 |                       | Phenolphthalein               | Industrial chemical   | C20 H14 O4        | 0.219 | ECOTOX |
| 39 |                       | Triphenylphosphine oxide      | Industrial chemical   | C18 H15 O P       | 0.012 | 25     |

ECOTOX is a website <https://cfpub.epa.gov/ecotox/> comprehensive ecotoxicology database maintained by the U.S. Environmental Protection Agency (EPA).

## Reference

- 1 E. L. Schymanski, J. Jeon, R. Gulde, K. Fenner, M. Ruff, H. P. Singer and J. Hollender, Identifying small molecules via high resolution mass spectrometry: Communicating confidence, *Environ. Sci. Technol.*, 2014, **48**, 2097–2098.
- 2 E. L. Schymanski, H. P. Singer, J. Slobodnik, I. M. Ipolyi, P. Oswald, M. Krauss, T. Schulze, P. Haglund, T. Letzel, S. Grosse, N. S. Thomaidis, A. Bletsou, C. Zwiener, M. Ibáñez, T. Portolés, R. De Boer, M. J. Reid, M. Onghena, U. Kunkel, W. Schulz, A. Guillon, N. Noyon, G. Leroy, P. Bados, S. Bogialli, D. Stipaničev, P. Rostkowski and J. Hollender, Non-target screening with high-resolution mass spectrometry: Critical review using a collaborative trial on water analysis, *Anal. Bioanal. Chem.*, 2015, **407**, 6237–6255.
- 3 European Chemicals Agency, Guidance on Information Requirements and Chemical Safety Assessment - Part B: Hazard assessment, *Eur. Chem. Agency*, 2011, 1–60.
- 4 A. Pandey, I. Kasuga, H. Furumai and F. Kurisu, Non-target liquid chromatography high-resolution mass spectrometry screening to prioritize unregulated micropollutants that persist through domestic wastewater treatment, *Sci. Total Environ.*, 2024, **947**, 174486.
- 5 N. Levin, R. M. Salek and C. Steinbeck, From databases to big data, *Metab. Phenotyping Pers. Public Healthc.*, 2016, 317–331.
- 6 L. Xie, F. Nakajima, I. Kasuga and F. Kurisu, Simultaneous screening for chemically diverse micropollutants in public water bodies in Japan by high-performance liquid chromatography–Orbitrap mass spectrometry, *Chemosphere*, 2021, **273**, 128524.
- 7 R. Loos, D. Marinov, I. Sanseverino, D. Napierska and T. Lettieri, *Review of the 1st*

*Watch List under the Water Framework Directive and recommendations for the 2nd Watch List*, 2018.

- 8 Echa, Guidance on information requirements and chemical safety assessment. Chapter R.10: Characterisation of dose [concentration]-response for environment, *Eur. Chem. Agency*, 2008, 1–65.
- 9 S. Zhou, C. Di Paolo, X. Wu, Y. Shao, T. B. Seiler and H. Hollert, Optimization of screening-level risk assessment and priority selection of emerging pollutants – The case of pharmaceuticals in European surface waters, *Environ. Int.*, 2019, **128**, 1–10.
- 10 N. Kraupner, S. Ebmeyer, M. Hutinel, J. Fick, C. F. Flach and D. G. J. Larsson, Selective concentrations for trimethoprim resistance in aquatic environments, *Environ. Int.*, 2020, **144**, 106083.
- 11 O. A. H. Jones, N. Voulvoulis and J. N. Lester, Aquatic environmental assessment of the top 25 English prescription pharmaceuticals, *Water Res.*, 2002, **36**, 5013–5022.
- 12 A. W. Olmstead, P. A. Kosian, R. Johnson, P. E. Blackshear, J. Haselman, C. Blanksma, J. J. Korte, G. W. Holcombe, E. Burgess, A. Lindberg-Livingston, B. A. Bennett, K. K. Woodis and S. J. Degitz, Trenbolone causes mortality and altered sexual differentiation in *Xenopus tropicalis* during larval development, *Environ. Toxicol. Chem.*, 2012, **31**, 2391–2398.
- 13 H. L. Schoenfuss, E. T. Furlong, P. J. Phillips, T. M. Scott, D. W. Kolpin, M. Cetkovic-Cvrlje, K. E. Lesteborg and D. C. Rearick, Complex mixtures, complex responses: Assessing pharmaceutical mixtures using field and laboratory approaches, *Environ. Toxicol. Chem.*, 2016, **35**, 953–965.

- 14 D. J. Caldwell, F. Mastrocco, P. D. Anderson, R. Länge and J. P. Sumpter, Predicted-no-effect concentrations for the steroid estrogens estrone, 17 $\beta$ -estradiol, estriol, and 17 $\alpha$ -ethinylestradiol, *Environ. Toxicol. Chem.*, 2012, **31**, 1396–1406.
- 15 M. Nendza and A. Wenzel, Discriminating toxicant classes by mode of action 1. (Eco)toxicity profiles, *Environ. Sci. Pollut. Res.*, 2006, **13**, 192–203.
- 16 M. Crane, D. Maycock, C. D. Watts, C. Atkinson and I. Johnson., Proposed EQS for Water Framework Directive Annex VIII substances: 2,4-dichlorophenoxy- acetic acid (2,4-D), 2007, 94.
- 17 M. Junghans, T. Backhaus, M. Faust, M. Scholze and L. H. Grimme, Application and validation of approaches for the predictive hazard assessment of realistic pesticide mixtures, *Aquat. Toxicol.*, 2006, **76**, 93–110.
- 18 H. Liu, B. Yuan and S. Li, Altered quantities and in vivo activities of cholinesterase from *Daphnia magna* in sub-lethal exposure to organophosphorus insecticides, *Ecotoxicol. Environ. Saf.*, 2012, **80**, 118–125.
- 19 B. Alslev, B. Korsgaard and P. Bjerregaard, Estrogenicity of butylparaben in rainbow trout *Oncorhynchus mykiss* exposed via food and water, *Aquat. Toxicol.*, 2005, **72**, 295–304.
- 20 Y. Su, F. Li, X. Xiao, H. Li, D. Wang and J. You, Ecological risk of galaxolide and its transformation product galaxolidone: evidence from the literature and a case study in Guangzhou waterways, *Environ. Sci. Process. Impacts*, 2023, **25**, 1337–1346.
- 21 J. M. Leach and A. N. Thakore, Isolation and identification of constituents toxic to

- juvenile rainbow trout (*Salmo gairdneri*) in caustic extraction effluents from kraft pulpmill bleach plants, *J.Fish.Res.Board Canada*, 1975, **32**, 1249–1257.
- 22 T. Madsen, H. B. Boyd, D. Nylén, A. R. Petersen, G. I. Petersen and F. Simonsen, Environmental and Health Assessment of Substances in Household Detergents and Cosmetic Detergent Products, *Environ. Proj.*, 2001, **615**, 1–35.
- 23 J. Zhang, H. Tao, J. Shi, H. Ge, B. Li, Y. Wang, M. Zhang and X. Li, Deriving aquatic PNECs of endocrine disruption effects for PFOS and PFOA by combining species sensitivity weighted distributions and adverse outcome pathway networks, *Chemosphere*, 2024, **346**, 140583.
- 24 S. Ai, X. Gao, X. Wang, J. Li, B. Fan, S. Zhao and Z. Liu, Exposure and tiered ecological risk assessment of phthalate esters in the surface water of Poyang Lake, China, *Chemosphere*, 2021, **262**, 1–9.
- 25 C. C. Lo and T. T. Hsieh, Acute toxicity to the golden apple snail and estimated bioconcentration potential of triphenylphosphine oxide and series of related compounds, *Bull. Environ. Contam. Toxicol.*, 2000, **65**, 104–111.
