# Supplementary material
Source: Royal Society of Chemistry journal article supplement (doi:10.1039/d6em00031b)
Supplement: d6em00031b2.xlsx [file d6em00031b2.xlsx]

## Sheet: General parameters
Table S1 General parameters for each river
River	Turbidity (NTU)	DOC (mg/L)	SUVA (L/mg·m)	pH	DO (mg/L)	EC (µS/cm)
CPR	35.5	2.71	2.44	6.81	5.41	316
PhR	10.7	5.27	1.42	6.7	6.5	189
PIR	18.2	2.02	2.61	6.53	6.01	172
UTR	58.9	2.54	1.97	6.8	4.83	202
Sampling Location	Province / Region	Dominant Land Use Types	Mean River Flow (m³/day)	Total WTP Discharge (m³/day)	Estimated Population in Catchment	Major Potential EOP Sources
Phong River (PhR)	Khon Kaen (Northeast)	Agricultural and peri-urban	3.2 × 106 ± 0.4 × 106	45,000 ± 5,000	~250,000	Agricultural runoff, domestic wastewater, livestock farming, landfill leachate, and limited industrial discharge
Chao Phraya River (CPR)	Bangkok / Central	Urban, industrial, and mixed-use	1.3 × 106 ± 1.0 × 106	120,000 ± 20,000	~5,600,000	Domestic sewage, personal care products, pharmaceuticals, hospital effluents, and industrial discharges from the Chao Phraya watershed
Ping River (PIR)	Chiang Mai (North)	Agricultural, urban, and peri-urban	4.0 × 106 ± 0.4 × 106	80,000 ± 10,000	~200,000	Urban wastewater, household chemicals, tourism activities, veterinary drugs, and agricultural runoff
U-Tapao Canal (UTR)	Songkhla (South)	Agricultural, urban, and industrial	5.1 × 106 ± 0.2 × 106	30,000 ± 4,000	~180,000	Industrial effluents, untreated domestic wastewater, and agricultural inputs
*River flow rate data from https://www.thaiwater.net/water/dam/large
*Total WTP discharge = Population served × Water use per capita (L/day)/1000
** Typical Thai urban water use: 200 L/person/day
*Population approximates using provincial or district population densities multiplied by catchment area.

## Sheet: Surrogate and internal
Table S2 Surrogate and internal standards used in this study
Name	Type	Formula	MW(g/mol)
Positive
Methamidophos-d6	Internal standard	C2H2D6NO2PS	147.17
Methomyl-d3	Internal standard	C5H7D3N2O2S	165.23
Caebendazim-d4	Internal standard	C9H5D4N3O2	195.21
Pirimicarb-d6	Internal standard	C11H12D6N4O2	244.32
Imazail-d5	Internal standard	C14H9Cl2D5N2O	302.21
Etofenprox-d5	Internal standard	C25H23D5O3	381.52
Negative
2-Ethylhexanoicacid	Surrogate	C8H16O2	144.24
Decanoicacid	Surrogate	C10H20O2	172.26
2,4-Dinitrophenol	Surrogate	C6H4N2O5	184.106
Diuron-D6	Internal standard	C9H4D6Cl2N2O	239.13
Heptadecafluorooctanesulfonic Acid	Surrogate	C8HF17O3S	500.13
Hexabromocyclododecane	Surrogate	C12H18Br6	641.7

## Sheet: Parameters of Orbitrap MS 
Table S3 Parameters of HESI and Orbitrap MS used for acquiring MS/MS data
Parameter	Description	Value in + mode	Value in - mode
Spray voltage (kV)	The nozzle uses voltage to squirt liquid. Molecules are ionized using this voltage.	4	4
Sheath gas flow rate (AU)	To aid in nebulizing the sample solution into a fine mist at the ESI nozzle's exit, the sheath gas flow rate (nitrogen) at the ESI source is carefully controlled.	40	40
Sweep gas flow rate	The outer-coaxial gas (nitrogen) assists the sheath gas in dispersing the sample and facilitating solvent evaporation.	0	0
Capillary temp. (ºC)	The temperature of the heated capillary in an ESI source. It helps to vaporize the solvent from the sample, facilitating the formation of ions for mass spectrometry analysis.	350	350
Aux gas heater temp. (ºC)	The temperature of the auxiliary gas used in the ESI process. It helps to further assist in solvent evaporation and ionization by providing additional heating to the sample as it exists the ESI source.	300	300
Injection time (ms)	Duration for ion injection from the C-trap to the mass analyzer.	50	50
Microscan's (s)	Number of micro scans per second.	1	1
Automatic gain control	Quantity or number of ions per scan.	Full MS : 1E6	Full MS : 1E6
		MS/MS: 2E4	MS/MS: 2E4

## Sheet: List of suspected EOPs
Table S4 Details of suspect compounds used for full scan-ddMS2
	List EOPs
Number	Name	Formula	Precursor ion (m/z)	Product ion (m/z)	mode	Category
1	Sulpiride	C15H23N3O4S1	342.152	-	Positive	Pharmaceutical
2	4-Acetamidoantipyrin	C13H15N3O2	246.125	228.1122 5556.0 228.1152 3227.0 204.1175 2217.0 204.1116 2104.0 228.1091 1913.0 104.0503 1592.0 159.0906 1462.0 229.1147 1210.0 159.0880 962.0 159.0984 951.0 83.0607 913.0 187.0838 795.0 205.1157 749.0 172.0594 729.0 145.0779 631.0 187.0922 592.0 186.0803 553.0 159.0958 548.0 229.1209 526.0 173.0675 509.0 dtype: float64	Positive	Pharmaceutical
3	Caffeine	C8H10N4O2	195.088	162.0575 2474.0 138.0660 2430.0 195.0881 2049.0 195.0910 1575.0 135.0464 1077.0 194.1918 688.0 138.0636 673.0 194.1833 661.0 138.0708 656.0 163.0357 652.0 160.0478 524.0 123.0450 517.0 132.0648 490.0 160.0530 488.0 195.1053 480.0 194.1890 472.0 151.0613 451.0 105.0463 449.0 163.0435 397.0 195.0853 394.0 dtype: float64	Positive	Food additive
3	Thiamethoxam	C8H10Cl1N5O3S1	292.029	181.0536 4180.0 211.0638 3333.0 131.9648 2647.0 211.0728 2449.0 152.0287 1907.0 133.9634 1138.0 122.0701 685.0 291.1780 643.0 180.0445 606.0 180.0473 605.0 291.1082 586.0 292.1916 544.0 187.1146 526.0 294.2169 513.0 180.0390 482.0 293.1544 467.0 291.1885 460.0 292.1951 452.0 182.0684 435.0 291.1676 422.0 dtype: float64	Positive	Pesticide
4	Carbendazim	C9H9N3O2	192.076	160.0504 748112.0 161.0537 42423.0 132.0554 42093.0 161.0511 38029.0 160.1773 17604.0 192.0764 11139.0 133.0636 7454.0 133.0612 7337.0 160.2783 6462.0 132.0530 2279.0 132.0601 2044.0 162.0549 1986.0 162.0575 1966.0 160.1151 1846.0 192.0792 1528.0 193.0815 1449.0 159.0425 1328.0 138.0636 1323.0 194.1918 1309.0 133.0589 1270.0 dtype: float64	Positive	Pesticide
5	Imidacloprid urea	C9H10Cl1N3O1	212.057	128.0285 5611.0 128.0262 4296.0 212.0596 2269.0 126.0108 2231.0 130.0248 1934.0 126.0131 1825.0 212.0537 1609.0 130.0201 1240.0 130.0225 1154.0 211.0597 1097.0 99.0551 1014.0 176.0906 789.0 128.0099 724.0 214.0516 721.0 176.0798 680.0 212.0567 645.0 128.0030 630.0 99.0530 630.0 133.0778 607.0 128.0053 591.0 dtype: float64	Positive	Pesticide
6	Thiabendazole	C10H7N3S1	202.045	202.0441 10746.0 175.0302 7350.0 175.0329 4488.0 131.0612 3006.0 131.0636 1970.0 203.0488 1570.0 203.0459 919.0 176.0334 712.0 176.0361 567.0 143.0564 489.0 138.1260 419.0 204.0356 414.0 143.0588 406.0 177.0340 327.0 204.0386 323.0 185.1212 313.0 177.0285 311.0 177.0476 300.0 132.0682 299.0 101.9465 295.0 dtype: float64	Positive	Pesticide
7	Imidacloprid	C9H10Cl1N5O2	256.059	175.0956 11452.0 175.0983 11411.0 209.0581 10210.0 209.0611 9327.0 175.1010 5371.0 175.0929 4686.0 209.0552 4102.0 209.0640 3552.0 211.0597 3073.0 211.0538 2729.0 211.0508 2450.0 211.0567 2230.0 173.0872 2083.0 174.0845 1892.0 173.0818 1863.0 174.0900 1708.0 174.0927 1689.0 173.0925 1608.0 209.0759 1423.0 173.0845 1397.0 dtype: float64	Positive	Pesticide
8	Antipyrin	C11H12N2O1	189.102	189.1017 110128.0 147.0937 10852.0 190.1049 9051.0 147.0912 8631.0 130.0651 8100.0 131.0683 6109.0 146.0828 6056.0 144.0789 5775.0 144.0813 5494.0 130.0675 5005.0 131.0636 4862.0 145.0754 4801.0 145.0705 4711.0 174.0786 4671.0 174.0813 4235.0 145.0803 4113.0 131.0730 3785.0 146.0877 3669.0 190.1077 3375.0 190.0851 2961.0 dtype: float64	Positive	Pharmaceutical
9	Clothianidin	C6H8Cl1N5O2S1	250.018	131.9661 2767.0 131.9708 2509.0 169.0571 1860.0 169.0544 1608.0 131.9684 1474.0 113.0136 1443.0 169.0518 1391.0 131.9637 1127.0 113.0223 883.0 133.9667 867.0 133.9620 680.0 169.0624 506.0 168.0557 503.0 168.0451 448.0 111.0753 439.0 133.9572 431.0 728.9599 425.0 110.0685 416.0 174.9792 407.0 110.0642 403.0 dtype: float64	Positive/ Negative	Pesticide
10	Aldoxycarb	C7H14N2O4S1	223.074	166.1593 2182.0 126.0108 2156.0 166.1620 2031.0 166.1541 1305.0 223.0740 1191.0 224.1387 1064.0 166.1567 1050.0 166.1699 1009.0 223.0831 744.0 223.0801 715.0 128.0099 662.0 223.0862 528.0 225.0739 513.0 224.1509 509.0 167.0943 432.0 788.7767 418.0 225.0770 407.0 179.1665 407.0 225.1199 401.0 226.1372 397.0 dtype: float64	Positive	Pesticide
11	2-Naphthylamine	C10H9N1	144.08	115.0542 4094.0 115.0564 3881.0 144.0802 3621.0 143.0751 2954.0 144.0827 2716.0 143.0702 2711.0 115.0520 2593.0 117.0556 1983.0 117.0578 1700.0 144.0777 1491.0 143.0775 1447.0 142.0637 1359.0 145.0839 1341.0 142.0661 1219.0 116.0593 1145.0 117.0688 1145.0 117.0733 1093.0 142.0685 1080.0 117.0666 1067.0 127.0511 990.0 dtype: float64	Positive	Industrial chemical
12	Tricyclazole	C9H7N3S1	190.043	190.0430 225624.0 163.0331 155840.0 136.0206 87149.0 191.0456 18311.0 164.0352 9928.0 191.0428 7930.0 191.0484 7511.0 192.0423 5686.0 137.0246 5637.0 165.0298 4754.0 192.0395 4578.0 165.0272 3161.0 138.0155 3148.0 137.0270 3090.0 192.0367 3079.0 190.1812 2751.0 138.0203 2374.0 138.0131 2200.0 138.0179 1945.0 191.0399 1888.0 dtype: float64	Positive	Pesticide
13	Monuron	C9H11Cl1N2O1	199.066	84.9685 1041.0 186.1619 640.0 84.9666 559.0 154.0899 528.0 201.1048 517.0 186.1284 514.0 72.0552 512.0 142.0879 422.0 202.0899 414.0 202.1044 401.0 198.1121 355.0 153.0855 347.0 72.0500 318.0 202.0811 317.0 129.0824 308.0 199.0581 306.0 97.9810 303.0 202.0986 286.0 93.0766 286.0 201.0787 263.0 dtype: float64	Positive	Pesticide
14	Phenolphthalein	C20H14O4	319.097	225.0534 14651.0 225.0503 8977.0 225.0564 8311.0 225.0626 6724.0 197.0546 1899.0 197.0604 1840.0 226.0645 1781.0 226.0584 1741.0 169.0661 1383.0 197.0575 1326.0 141.0734 1302.0 319.1035 1220.0 197.0661 1172.0 319.0889 1120.0 169.0608 1120.0 141.0661 1001.0 151.0538 872.0 319.0926 816.0 151.0589 795.0 152.0590 551.0 dtype: float64	Positive	Industrial chemical
15	Etoricoxib	C18H15Cl1N2O2S1	359.066	-	Positive	Pharmaceutical
16	Mesulfenfos	C10H15O4P1S2	295.023	279.9979 138845.0 295.0213 46917.0 278.0188 26940.0 278.0154 26290.0 232.0294 20137.0 262.9922 10671.0 281.0021 9740.0 280.9987 9472.0 200.0043 9379.0 264.0054 9248.0 264.0021 8538.0 261.9876 7897.0 281.9944 7780.0 152.9815 7210.0 152.9840 6340.0 168.9837 4455.0 232.0356 4337.0 232.0325 4256.0 168.9917 4109.0 169.9854 4108.0 dtype: float64	Positive	Pesticide
17	Phorate sulfone	C7H17O4P1S3	293.009	-	Positive	Pesticide
18	Atrazine	C8H14Cl1N5	216.101	174.0542 198358.0 174.0515 70944.0 216.1001 66454.0 176.0497 46558.0 218.0962 18779.0 146.0234 16484.0 175.0573 9014.0 174.0569 8561.0 146.0210 7616.0 218.0931 6685.0 217.1000 5231.0 148.0209 5137.0 216.1031 4309.0 175.0546 3466.0 175.0600 3139.0 217.1060 2758.0 175.0519 2619.0 176.0524 2363.0 148.0184 2174.0 217.1030 2153.0 dtype: float64	Positive	Pesticide
19	Metalaxyl	C15H21NO4	280.153	192.1387 55355.0 160.1125 34433.0 220.1318 32598.0 220.1349 12385.0 162.1278 6041.0 193.1412 5645.0 162.1304 5012.0 193.1440 4712.0 221.1347 3774.0 221.1378 3712.0 161.1160 3704.0 193.1383 3465.0 221.1438 1806.0 248.1292 1730.0 248.1259 1665.0 248.1324 1507.0 221.1317 1465.0 161.1186 1410.0 161.1134 1344.0 248.1227 1324.0 dtype: float64	Positive	Pesticide
20	Buturon	C12H13Cl1N2O1	237.078	149.0235 84516.0 193.0477 23727.0 150.0269 6636.0 121.0300 6476.0 150.0244 5362.0 149.0210 4771.0 194.0527 2716.0 237.0752 2134.0 207.0311 1716.0 193.0506 1700.0 237.0720 1669.0 207.0340 1568.0 207.0281 1545.0 237.0815 1416.0 191.0003 1411.0 207.0369 1137.0 151.0287 862.0 191.0060 860.0 240.1478 756.0 193.0136 749.0 dtype: float64	Positive	Pesticide
21	Diuron	C9H10Cl2N2O1	233.025	159.9728 14335.0 233.0254 14236.0 233.0223 13887.0 72.0447 11691.0 161.9690 9669.0 235.0191 9646.0 161.9716 4548.0 235.0223 3468.0 187.9643 3136.0 187.9699 3032.0 187.9615 2688.0 189.9640 2401.0 187.9671 2328.0 132.9621 1998.0 234.0290 1491.0 152.9962 1469.0 134.9560 1341.0 153.0013 1319.0 236.0176 1165.0 134.9608 1165.0 dtype: float64	Positive/ Negative	Pesticide
22	Flumorph	C21H22FNO4	372.161	285.0923 831949.0 165.0535 188155.0 372.1573 170333.0 286.0950 114784.0 257.0974 60871.0 372.1613 57132.0 242.0721 31245.0 373.1645 25749.0 226.0788 25504.0 285.2581 18097.0 373.1606 16802.0 226.0757 14627.0 166.0591 13945.0 372.1534 13026.0 285.2616 11087.0 227.0488 9328.0 123.0246 9309.0 166.0565 9297.0 287.0995 8693.0 258.0990 7565.0 dtype: float64	Positive	Pesticide
23	Fipronil sulfone	C12H4Cl2F6N4O2S1	452.938	-	Positive/ Negative	Pesticide
24	Chlorantraniliprole	C18H14Br1Cl2N5O2	481.98	-	Positive/ Negative	Pesticide
25	Ametryn	C9H17N5S1	228.129	186.0813 117071.0 228.1261 51328.0 228.1291 30009.0 187.0818 6006.0 158.0507 5912.0 229.1315 4557.0 187.0790 4555.0 187.0846 4305.0 229.1284 3766.0 188.0737 3402.0 158.0481 3080.0 187.0874 2944.0 188.0765 2672.0 144.0581 2008.0 230.1236 1862.0 144.0630 1772.0 212.0626 1753.0 188.0709 1735.0 188.0850 1703.0 212.0686 1667.0 dtype: float64	Positive	Pesticide
26	Albendazole	C12H15N3O2S1	266.095	234.0728 13894.0 234.0666 9304.0 191.0173 7263.0 192.0225 4907.0 191.0145 4554.0 159.0425 2731.0 192.0168 2536.0 235.0756 2374.0 159.0399 2257.0 266.0981 1536.0 192.0253 1462.0 266.1048 1412.0 159.0477 1154.0 235.0725 1153.0 266.0847 1068.0 235.0787 1046.0 236.0711 973.0 159.0529 956.0 235.0850 938.0 266.1014 622.0 dtype: float64	Positive	Pharmaceutical
27	Azoxystrobin	C22H17N3O5	404.123	372.0969 442306.0 329.0797 259911.0 344.1001 222945.0 329.0760 213420.0 373.1003 69865.0 373.0963 48664.0 373.1042 47751.0 345.1030 39003.0 330.0827 35074.0 344.1039 29851.0 301.0838 23052.0 328.0707 20963.0 183.0527 15658.0 301.0767 15656.0 183.0555 15627.0 316.1057 13174.0 172.0380 12123.0 216.0640 11384.0 201.0418 8972.0 210.0423 8404.0 dtype: float64	Positive	Pesticide
28	Pyrimethanil	C12H13N3	200.118	200.1201 844294.0 200.1172 573983.0 201.1201 128142.0 183.0915 99671.0 182.0822 60559.0 168.0672 59272.0 200.2591 33422.0 181.0757 30835.0 143.0613 16799.0 200.3778 12093.0 184.0925 10410.0 159.0906 10313.0 143.0637 7755.0 200.3344 7695.0 167.0711 7281.0 140.0495 7097.0 183.0887 6794.0 142.0668 6747.0 200.3750 6484.0 156.0773 6039.0 dtype: float64	Positive	Pesticide
29	Boscalid	C18H12Cl2N2O1	343.041	307.0609 393989.0 272.0931 169883.0 271.0847 160173.0 309.0579 80141.0 308.0622 53960.0 309.0615 42398.0 343.0381 32440.0 308.0658 31061.0 345.0346 20603.0 139.9890 20349.0 273.0966 18960.0 289.0553 16093.0 273.0932 14833.0 345.0384 12059.0 243.0869 12025.0 289.0518 11146.0 254.0853 9932.0 310.0588 8853.0 243.0901 8062.0 254.0821 7317.0 dtype: float64	Positive/ Negative	Pesticide
30	Benzylparaben	C14H12O3	229.088	175.0384 377950.0 229.0868 193229.0 187.0362 106785.0 229.0837 92631.0 159.0442 88272.0 147.0440 50206.0 176.0415 26745.0 173.0594 26252.0 201.0534 24152.0 187.0754 23071.0 230.0914 22067.0 171.0436 15637.0 189.0511 12343.0 187.0726 12055.0 155.0844 11337.0 214.0623 11303.0 230.0883 10861.0 214.0563 10739.0 171.0409 9319.0 160.0471 8659.0 dtype: float64	Positive	Personal care product
31	Diazepam	C16H13Cl1N2O1	285.082	285.0819 8850.0 193.0876 4069.0 222.1189 3084.0 287.0721 2950.0 154.0439 2667.0 257.0854 1899.0 222.1067 1863.0 228.0565 1795.0 286.0848 1637.0 286.0779 1483.0 287.0617 1234.0 194.0927 1040.0 241.0556 978.0 154.0515 973.0 286.0952 796.0 156.0390 783.0 286.3133 748.0 227.0471 745.0 241.0461 741.0 288.0819 716.0 dtype: float64	Positive	Pharmaceutical
32	Paclobutrazol	C15H20Cl1N3O1	294.138	294.1380 2719.0 70.0391 2443.0 294.1274 2218.0 125.0114 1569.0 190.9636 1362.0 294.1485 1270.0 294.1415 1136.0 294.1450 1083.0 70.0408 1034.0 190.9692 959.0 294.1204 824.0 294.1345 775.0 294.1520 770.0 149.0213 739.0 165.0482 675.0 296.1380 631.0 125.0183 606.0 296.1309 587.0 296.1415 579.0 127.0211 573.0 dtype: float64	Positive	Pesticide
33	Methoxyfenozide	C22H28N2O3	369.219	-	Positive/ Negative	Pesticide
34	Fluopicolide	C14H8Cl3F3N2O1	382.971	172.9553 181885.0 174.9522 80168.0 144.9608 9132.0 173.9577 7681.0 146.9580 4408.0 193.9980 3677.0 175.9549 3674.0 342.0831 3483.0 175.9603 3238.0 364.9655 2157.0 366.9616 2075.0 366.9538 1993.0 314.0910 1937.0 382.9786 1910.0 212.0120 1808.0 384.9632 1733.0 382.9666 1725.0 212.0060 1631.0 234.0572 1561.0 314.0983 1277.0 dtype: float64	Positive	Pesticide
35	Prometryn	C10H19N5S1	242.145	158.0496 12629.0 200.0970 8347.0 242.1434 7591.0 211.0579 5617.0 226.0768 4746.0 226.0830 4533.0 225.0718 1173.0 225.0810 1117.0 227.0841 1063.0 201.0940 924.0 243.1412 904.0 159.0468 871.0 212.0639 807.0 212.0580 726.0 227.0779 726.0 243.1444 710.0 243.1507 707.0 160.0445 653.0 160.0497 651.0 201.0998 646.0 dtype: float64	Positive	Pesticide
36	Triazophos	C12H16N3O3P1S1	314.073	162.0653 19196.0 162.0679 6930.0 119.0585 2365.0 163.0671 1742.0 178.0427 1710.0 163.0697 1668.0 163.0723 1307.0 314.0765 1078.0 178.0399 983.0 178.0454 931.0 314.0620 819.0 96.9526 727.0 571.8745 721.0 314.0729 714.0 119.0630 710.0 178.0509 664.0 178.0481 645.0 190.1050 572.0 634.8961 561.0 314.0874 510.0 dtype: float64	Positive	Pesticide
37	Spirotetramat	C21H27N1O5	374.197	-	Positive	Pesticide
38	Tetraconazole	C13H11Cl2F4N3O1	372.027	-	Positive	Pesticide
39	Thifluzamide	C13H6Br2F6N2O2S1	526.849	-	Positive	Pesticide
40	Metolachlor	C15H22Cl1N1O2	284.143	252.1156 1112509.0 176.1422 722403.0 254.1110 461134.0 176.1449 230345.0 253.1172 194681.0 177.1456 61005.0 254.1142 47157.0 255.1133 47138.0 252.2716 44928.0 160.1125 30033.0 212.0835 22938.0 184.0494 22452.0 184.0522 18570.0 253.1237 17928.0 134.0970 15997.0 252.4048 15900.0 158.0970 15770.0 255.1165 15242.0 254.2708 14670.0 176.2780 14152.0 dtype: float64	Positive	Pesticide
41	Picoxystrobin	C18H16F3NO4	368.111	-	Positive	Pesticide
42	Flusilazole	C16H15F2N3Si	316.107	165.0695 50211.0 165.0669 33578.0 247.0755 29842.0 247.0722 21091.0 316.1057 14432.0 316.3204 11229.0 219.0431 11055.0 166.0728 8484.0 166.0780 8437.0 316.3168 7988.0 166.0754 7362.0 248.0736 5643.0 185.0795 5112.0 185.0739 5095.0 169.0475 4765.0 183.0610 4344.0 157.0273 4156.0 169.0502 3985.0 185.0767 3506.0 164.0588 3365.0 dtype: float64	Positive	Pesticide
43	Loteprednol etabonate	C24H31Cl1O7	467.179	-	Positive	Pharmaceutical
44	Chlormadinone acetate	C23H29Cl1O4	405.181	301.1374 2742.0 267.1705 2609.0 309.1898 2499.0 303.1361 1969.0 302.1466 1526.0 265.1577 1297.0 303.1504 1205.0 302.1359 1009.0 266.1615 909.0 345.1589 774.0 304.1343 771.0 251.1387 761.0 310.1907 662.0 304.1451 658.0 407.2141 651.0 405.1977 561.0 405.1771 536.0 302.1608 494.0 237.1317 488.0 291.1804 483.0 dtype: float64	Positive	Pharmaceutical
45	Benzovindiflupyr	C18H15Cl2F2N3O1	398.065	-	Positive	Pesticide
46	Tebuconazole	C16H22Cl1N3O1	308.154	308.1509 54443.0 70.0408 19968.0 310.1511 13951.0 125.0160 13545.0 70.0391 8943.0 125.0137 8534.0 309.1574 7304.0 310.1475 5581.0 151.0312 5569.0 310.1583 4365.0 127.0096 3308.0 151.0287 3122.0 127.0119 2942.0 309.1502 2726.0 153.0266 2301.0 311.1536 1976.0 309.1646 1969.0 115.0542 1954.0 139.0341 1685.0 165.0430 1646.0 dtype: float64	Positive	Pesticide
47	Penconazole	C13H15Cl2N3	284.074	158.9745 146321.0 160.9727 75047.0 70.0397 16394.0 172.9921 7941.0 159.9798 7723.0 174.9896 4725.0 162.9729 4048.0 161.9764 3625.0 174.9869 2458.0 137.0147 2400.0 284.0704 2383.0 123.0012 2333.0 162.9702 2206.0 286.0744 1981.0 286.0675 1807.0 161.9816 1395.0 122.9989 1002.0 124.0064 795.0 139.0149 762.0 283.3121 738.0 dtype: float64	Positive	Pesticide
48	Progesterone	C21H30O2	315.232	-	Positive	Pharmaceutical
49	Mefentrifluconazole	C18H15ClF3N3O2	398.09	-	Positive	Pesticide
50	Pyraclostrobin	C19H18Cl1N3O4	388.105	163.0617 136224.0 164.0693 40386.0 163.0643 25935.0 296.0591 25599.0 194.0784 25236.0 162.0520 24915.0 162.0572 6232.0 164.0746 6226.0 298.0555 6179.0 194.0813 6022.0 261.0908 4979.0 149.0484 4839.0 297.0600 4190.0 253.0524 3734.0 165.0721 3028.0 324.0503 2841.0 218.0811 2735.0 324.0577 2712.0 218.0871 2547.0 165.0774 2543.0 dtype: float64	Positive	Pesticide
51	Prochloraz	C15H16Cl3N3O2	376.039	-	Positive	Pesticide
52	(+/-)-Indoxacarb	C22H17Cl1F3N3O7	528.081	203.0168 18852.0 143.0686 16202.0 218.0418 13162.0 150.0119 9293.0 203.0197 6468.0 190.0061 6161.0 173.0971 4990.0 249.0415 4698.0 209.1180 4506.0 277.1391 3791.0 135.0813 3100.0 152.0060 3062.0 217.0156 2473.0 143.0760 2473.0 219.0401 2280.0 223.0134 2095.0 219.0310 1903.0 527.3279 1805.0 293.0317 1704.0 527.3185 1686.0 dtype: float64	Positive	Pesticide
53	Lopinavir	C37H48N4O5	629.371	429.2524 1578091.0 155.1175 1478656.0 183.1136 1207873.0 447.2660 964209.0 447.2617 705336.0 430.2536 575970.0 448.2663 446551.0 310.1778 397909.0 448.2620 220588.0 250.1569 172660.0 611.3591 165647.0 156.1208 117611.0 184.1147 108603.0 412.2238 79827.0 611.3540 72695.0 311.1805 69650.0 384.2301 67580.0 429.4560 57483.0 612.3613 55715.0 447.4695 52995.0 dtype: float64	Positive/ Negative	Pharmaceutical
54	Benzyl butyl phthalate	C19H20O4	313.145	-	Positive	Industrial chemical
55	Tributyl phosphate	C12H27O4P1	267.174	98.9847 22607.0 269.1877 699.0 237.0815 522.0 189.1636 447.0 80.9757 423.0 267.1770 379.0 95.0823 324.0 119.0838 315.0 267.1837 314.0 270.2363 294.0 169.1087 279.0 155.0436 274.0 155.0487 265.0 253.0556 265.0 222.0426 260.0 268.1647 250.0 193.1160 249.0 123.1237 246.0 123.1147 240.0 270.2296 237.0 dtype: float64	Positive	Industrial chemical
56	Methylparaben	C8H8O3	153.054	121.0289 508503.0 93.0324 30210.0 122.0304 23689.0 122.0326 18653.0 121.1393 14341.0 121.2271 6822.0 121.0852 2965.0 123.0337 2110.0 153.0570 1973.0 94.0396 1972.0 123.0360 1871.0 121.2001 1834.0 153.0519 1343.0 94.0337 1212.0 153.0595 1177.0 65.0377 1145.0 65.0394 1076.0 120.0182 924.0 152.0613 752.0 121.1685 738.0 dtype: float64	Positive	Food additive
57	Metaflumizone	C24H16F6N4O2	507.121	-	Positive	Pesticide
58	17beta-Estradiol	C18H24O2	273.187	255.1760 1708295.0 240.1509 1131850.0 211.1114 1046943.0 255.1727 949649.0 273.1845 685756.0 256.1773 632370.0 226.1322 621579.0 225.1270 514177.0 183.1164 387140.0 274.1866 205275.0 227.1797 192536.0 197.1322 187143.0 198.1391 178827.0 241.1509 168520.0 212.1534 139466.0 185.0962 134158.0 212.1146 127845.0 255.3329 123914.0 157.1017 103402.0 227.1365 71880.0 dtype: float64	Positive	Pharmaceutical
59	Lufenuron	C17H8Cl2F8N2O3	510.989	-	Positive/ Negative	Pesticide
60	Tolfenpyrad	C21H22Cl1N3O2	384.149	197.0965 67754.0 384.1487 37843.0 384.1447 18799.0 386.1483 10114.0 145.0544 9809.0 249.1228 9753.0 193.0587 8227.0 385.1479 7664.0 198.1031 6886.0 171.0341 6713.0 169.0997 6497.0 198.1003 5455.0 154.0762 5373.0 169.1023 4997.0 385.1519 4247.0 385.1439 4241.0 154.0813 3350.0 249.1325 3096.0 117.0224 2860.0 147.0498 2858.0 dtype: float64	Positive	Pesticide
61	Butachlor	C17H26Cl1N1O2	312.172	162.1278 17343.0 238.0967 8530.0 238.0999 8207.0 281.0476 6232.0 147.1068 4548.0 281.0510 4323.0 147.1044 4304.0 281.0544 3729.0 240.0993 2769.0 240.0962 2660.0 265.0179 2535.0 265.0245 2248.0 163.1350 2174.0 163.1298 2157.0 163.1141 2150.0 240.1025 2029.0 265.0278 1771.0 299.0604 1760.0 163.1193 1708.0 240.0898 1700.0 dtype: float64	Positive	Pesticide
62	Chlorpyrifos	C9H11Cl3N1O3P1S1	349.934	-	Positive	Pesticide
63	Pendimethalin	C13H19N3O4	282.143	212.0656 9932.0 194.0550 4640.0 195.0652 1969.0 148.0613 1962.0 195.0595 1753.0 147.0547 1629.0 178.0618 1522.0 148.0713 1320.0 118.0516 1255.0 177.0531 1182.0 118.0560 1029.0 149.0563 1007.0 213.0649 1006.0 119.0585 949.0 178.0536 934.0 91.0421 892.0 177.0449 740.0 177.0585 730.0 131.0604 614.0 131.0534 586.0 dtype: float64	Positive	Pesticide
64	Dicyclohexyl phthalate	C20H26O4	331.193	-	Positive	Industrial chemical
65	Chlorfluazuron	C20H9Cl3F5N3O3	539.971	-	Positive/ Negative	Pesticide
66	Estradiol benzoate	C25H28O3	377.211	-	Positive	Pharmaceutical
67	Pyridaben	C19H25Cl1N2O1S1	365.145	147.1168 725164.0 309.0818 106200.0 148.1186 56269.0 311.0814 31001.0 132.0930 24962.0 119.0853 18748.0 147.2384 17383.0 310.0862 12496.0 117.0688 8158.0 147.3352 6361.0 105.0693 5324.0 115.0542 3115.0 312.0854 2961.0 145.1037 2695.0 133.0966 2638.0 120.0877 1947.0 147.1788 1906.0 131.0838 1892.0 149.1263 1781.0 325.2773 1284.0 dtype: float64	Positive	Pesticide
68	4-Aminobenzoic acid	C7H7N1O2	138.054	138.0612 1220.0 138.0540 1188.0 94.0634 442.0 92.0523 414.0 92.0503 403.0 120.0473 276.0 dtype: float64	Positive	Personal care product
69	Metformin	C4H11N5	130.109	134.0676 799.0 71.0624 431.0 68.0317 282.0 71.0590 227.0 88.0842 202.0 dtype: float64	Positive	Pharmaceutical
70	Triisopropanolamine	C9H21N1O3	192.161	135.0433 2846.0 108.9047 1442.0 174.1434 1268.0 194.1183 1067.0 174.1515 1033.0 174.1488 955.0 156.1336 787.0 192.1588 735.0 192.1531 651.0 107.0504 614.0 107.0568 608.0 156.1387 517.0 107.0441 497.0 98.0970 465.0 136.0511 426.0 113.9636 404.0 135.0314 385.0 156.1464 364.0 194.1040 316.0 192.1673 308.0 dtype: float64	Positive	Industrial chemical
71	Nicotine	C10H14N2	163.122	130.0628 3749.0 130.0675 3647.0 130.0651 2701.0 117.0559 1882.0 117.0603 1818.0 132.0800 1459.0 117.0581 1396.0 132.0823 1000.0 132.0753 887.0 132.0776 858.0 106.0660 736.0 131.0659 686.0 131.0683 575.0 163.1270 516.0 120.0818 447.0 118.0632 435.0 131.0730 386.0 164.1008 383.0 163.1192 364.0 120.0863 307.0 dtype: float64	Positive	Pharmaceutical
72	Cyromazine	C6H10N6	167.105	167.1029 20257.0 125.0843 3022.0 125.0820 1949.0 168.1043 1896.0 125.0797 1360.0 168.1016 962.0 139.0728 857.0 168.1069 833.0 139.0680 552.0 168.1176 521.0 151.0689 493.0 139.0704 429.0 127.0811 418.0 150.0845 411.0 167.1055 389.0 84.9588 371.0 125.0912 358.0 96.9612 346.0 96.9572 341.0 150.0770 305.0 dtype: float64	Positive	Pesticide
73	Cotinine	C10H12N2O1	177.102	177.0993 7572.0 177.1021 4897.0 80.0503 1569.0 98.0584 1118.0 98.0645 1062.0 178.1057 830.0 146.0556 809.0 98.9786 701.0 146.0630 690.0 146.0506 581.0 178.1193 577.0 98.0605 571.0 80.0466 554.0 178.1248 539.0 98.9765 538.0 178.0975 537.0 117.0603 525.0 177.1130 494.0 160.1092 467.0 178.1221 466.0 dtype: float64	Positive	Natural product
74	Desnitro-imidacloprid	C9H11Cl1N4	211.075	126.0108 3323.0 211.0805 1246.0 128.0076 1214.0 211.0716 1072.0 126.0131 910.0 126.0039 902.0 126.0085 869.0 213.0679 556.0 213.0709 465.0 213.0858 415.0 211.0746 414.0 175.0929 400.0 133.0754 378.0 175.1010 355.0 195.0624 353.0 175.0983 341.0 99.0082 313.0 128.0030 310.0 213.0589 275.0 213.0768 255.0 dtype: float64	Positive	Pesticide
75	Desnitro Thiamethoxam	C8H11Cl1N4O1S1	247.041	131.9684 1234.0 131.9661 961.0 131.9637 595.0 249.1648 586.0 133.9691 508.0 131.9755 398.0 133.9643 374.0 174.1115 355.0 160.9940 278.0 160.9862 250.0 249.1551 249.0 144.0827 246.0 249.1712 234.0 173.9982 224.0 133.9596 218.0 158.9445 214.0 185.0751 211.0 250.1702 205.0 dtype: float64	Positive	Pesticide
76	2-Aminobenzimidazole	C7H7N3	134.073	134.0700 9841.0 134.0748 4006.0 135.0813 935.0 92.0478 905.0 135.0766 863.0 133.0625 799.0 135.0694 789.0 93.0558 670.0 134.0866 660.0 92.0537 648.0 92.0439 637.0 107.0631 597.0 107.0589 585.0 93.0617 412.0 117.0492 374.0 117.0426 337.0 107.0673 322.0 136.0582 253.0 135.0742 247.0 133.0672 246.0 dtype: float64	Positive	Natural product
77	2,3,4,9-Tetrahydro-6-methoxy-1H-pyrido(3,4-b)indol-1-one	C12H12N2O2	217.098	217.0940 83437.0 174.0786 8735.0 218.0992 7938.0 173.0702 3819.0 148.0732 2870.0 217.0970 2659.0 189.0989 2560.0 176.0687 2323.0 158.0573 2222.0 160.0756 1985.0 146.0630 1844.0 147.0664 1715.0 160.0704 1702.0 158.0624 1641.0 175.0817 1622.0 146.0853 1311.0 148.0757 1257.0 201.0650 1243.0 176.0714 1204.0 160.0833 1203.0 dtype: float64	Positive	Pharmaceutical
78	4-Antipyrinecarboxaldehyde	C12H12N2O2	217.098	217.0976 4158.0 217.0916 2398.0 174.0738 796.0 174.0764 758.0 174.0845 715.0 218.1057 712.0 174.0818 620.0 980.7175 603.0 176.0798 462.0 995.0320 335.0 173.0683 314.0 146.0813 304.0 825.1816 299.0 176.0743 294.0 218.0936 288.0 217.0946 288.0 145.0741 286.0 158.0610 280.0 173.0710 277.0 217.1006 273.0 dtype: float64	Positive	Pharmaceutical
79	Norharman	C11H8N2	169.076	169.0768 48893.0 168.0672 6924.0 170.0788 5215.0 170.0815 4638.0 115.0563 3371.0 142.0644 2800.0 141.0564 2116.0 142.0668 1606.0 140.0471 1517.0 142.0619 1318.0 168.0698 1251.0 141.0588 1175.0 167.0632 866.0 167.0526 855.0 142.0546 795.0 97.9673 778.0 167.0579 765.0 115.0695 636.0 140.0616 584.0 142.0766 552.0 dtype: float64	Positive	Natural product
80	5-Carboline	C11H8N2	169.076	169.0757 11687.0 169.0784 2029.0 168.0689 1866.0 170.0802 1168.0 168.0716 1122.0 168.0663 1083.0 115.0542 1071.0 170.0748 934.0 170.0829 846.0 140.0517 732.0 142.0637 556.0 115.0586 477.0 170.0909 467.0 168.0530 460.0 141.0607 420.0 115.0564 405.0 142.0661 376.0 142.0685 361.0 731.5198 350.0 168.0796 349.0 dtype: float64	Positive	Pharmaceutical
81	4-Aminobenzamide	C7H8N2O1	137.07	94.0633 4258.0 94.0693 1596.0 77.0398 943.0 139.0535 576.0 93.0598 476.0 136.0558 433.0 95.0683 408.0 92.0518 407.0 92.0498 366.0 77.0380 356.0 120.0437 335.0 140.0713 335.0 92.0557 333.0 98.9603 309.0 95.0663 303.0 120.0460 294.0 93.0538 272.0 115.0585 268.0 98.9623 258.0 77.0452 217.0 dtype: float64	Positive	Industrial chemical
82	1,3-Diphenylguanidine	C13H13N3	212.116	212.1176 40641.0 195.0918 29400.0 213.1232 4007.0 119.0615 3905.0 196.0963 2914.0 170.1001 2085.0 213.1202 1870.0 170.1055 1841.0 212.1206 1696.0 196.0877 1549.0 213.1262 1326.0 195.0889 1178.0 94.0633 1116.0 195.0946 1110.0 212.1474 1003.0 212.1087 962.0 94.0693 960.0 196.0906 853.0 167.0764 744.0 168.0831 714.0 dtype: float64	Positive	Industrial chemical
83	Harman	C12H10N2	183.093	183.0930 6063.0 183.0875 4864.0 183.0903 3594.0 183.0986 2540.0 115.0542 1023.0 184.0966 952.0 115.0586 881.0 182.0840 739.0 184.0994 708.0 184.0938 690.0 168.0689 668.0 183.1069 581.0 115.0630 558.0 881.1527 531.0 184.0911 514.0 184.1105 492.0 155.0759 462.0 182.0812 451.0 168.0716 429.0 184.1077 402.0 dtype: float64	Positive	Pharmaceutical
84	Amantadine	C10H17N1	152.145	135.1170 99690.0 136.1203 9048.0 152.1448 4767.0 136.1179 4377.0 107.0864 3719.0 107.0843 3214.0 135.1146 2761.0 152.1474 2040.0 93.0696 2008.0 93.0676 1636.0 93.0736 1530.0 107.0822 1354.0 107.0885 1351.0 91.0551 1067.0 108.0925 668.0 107.0928 623.0 91.0590 600.0 153.1460 587.0 135.2336 565.0 79.0519 563.0 dtype: float64	Positive	Pharmaceutical
85	Isophorone	C9H14O1	139.114	77.0416 918.0 93.0696 869.0 91.0571 720.0 93.0676 653.0 77.0380 630.0 91.0531 608.0 105.0673 578.0 83.0476 574.0 83.0495 544.0 83.0551 496.0 105.0694 447.0 139.1115 424.0 98.9623 409.0 79.0555 399.0 77.0344 390.0 139.1139 374.0 109.0649 350.0 103.0570 347.0 94.0812 339.0 98.9582 339.0 dtype: float64	Positive	Industrial chemical
86	2-Quinolinol	C9H7N1O1	146.059	128.0493 1851.0 128.0516 1621.0 128.0470 958.0 146.0615 836.0 128.0539 636.0 146.0541 420.0 101.0422 361.0 146.0590 341.0 694.3258 288.0 dtype: float64	Positive	Natural product
87	3-Methyloxindole	C9H9NO	148.076	130.0621 1475.0 130.0668 1396.0 131.0510 1157.0 103.0532 1085.0 131.0487 899.0 148.0737 883.0 103.0573 733.0 148.0762 727.0 133.0565 574.0 148.0812 542.0 131.0463 534.0 133.0518 520.0 132.0507 436.0 103.0615 435.0 152.0689 412.0 149.0763 411.0 132.0436 391.0 132.0389 372.0 133.0471 352.0 123.0246 321.0 dtype: float64	Positive	Natural product
88	Vulgarin	C15H20O4	265.144	265.1405 1721.0 265.1438 1405.0 267.1502 1398.0 145.1025 1269.0 267.1569 1214.0 145.0976 1198.0 131.0894 1172.0 107.0864 1169.0 265.1338 1166.0 119.0838 1156.0 135.0789 1151.0 145.1000 1119.0 143.0833 1070.0 267.1603 1061.0 145.1074 1042.0 173.0971 1015.0 267.1536 994.0 267.1469 942.0 265.1505 932.0 149.0984 927.0 dtype: float64	Positive	Pharmaceutical
89	Reynosin	C15H20O3	249.149	190.0879 2982.0 145.1025 2872.0 190.0795 2793.0 131.0823 2724.0 145.0976 2464.0 145.1000 1802.0 173.0971 1641.0 131.0870 1605.0 131.0847 1596.0 145.1050 1559.0 145.0951 1531.0 204.1029 1506.0 119.0860 1494.0 171.1159 1406.0 204.1087 1397.0 204.0970 1395.0 105.0736 1378.0 161.0947 1367.0 191.1078 1367.0 191.1050 1360.0 dtype: float64	Positive	Natural product
90	Albendazole sulfone	C12H15N3O4S1	298.092	159.0442 4965.0 266.0643 4518.0 266.0576 4455.0 224.0138 2164.0 267.0599 866.0 298.0837 752.0 160.0497 601.0 153.0954 375.0 267.0499 357.0 298.0696 353.0 160.0367 338.0 301.1016 329.0 175.1142 312.0 159.1113 286.0 298.1049 272.0 268.0541 270.0 300.1577 265.0 298.1438 258.0 187.1118 249.0 173.0918 230.0 dtype: float64	Positive	Pharmaceutical
91	Tryptophol	C10H11N1O1	162.091	144.0802 11247.0 143.0726 4775.0 115.0542 4083.0 144.0777 4048.0 120.0809 3674.0 120.0787 3604.0 117.0688 3162.0 117.0644 2858.0 117.0600 2825.0 115.0520 2415.0 120.0832 2109.0 143.0751 2014.0 162.0914 1999.0 127.0534 1772.0 118.0649 1574.0 144.0827 1472.0 165.0745 1400.0 127.0511 1388.0 143.0677 1380.0 105.0337 1369.0 dtype: float64	Positive	Natural product
92	1-(4-Methoxyphenyl)pent-1-en-3-one	C12H14O2	191.105	108.9025 3493.0 145.1000 2791.0 135.0409 2207.0 109.0649 2095.0 165.0669 1874.0 115.0541 1678.0 105.0673 1652.0 105.0715 1460.0 131.0870 1420.0 189.0679 1381.0 190.0738 1377.0 191.0852 1358.0 117.0669 1221.0 152.0641 1164.0 129.0681 1123.0 91.0571 1078.0 175.0709 1078.0 107.0864 1018.0 178.0756 1015.0 178.0838 1008.0 dtype: float64	Positive	Food additive
93	3,4-Dimethoxycinnamic acid	C11H12O4	209.082	191.0710 22636.0 163.0749 10128.0 163.0775 7522.0 163.0723 3248.0 161.0615 3198.0 148.0488 2976.0 148.0513 2864.0 148.0538 2802.0 176.0472 2491.0 192.0792 2418.0 161.0589 2256.0 192.0707 2073.0 192.0764 1898.0 161.0563 1728.0 163.0880 1624.0 176.0553 1523.0 192.0678 1394.0 209.0847 1222.0 164.0771 1127.0 164.0824 971.0 dtype: float64	Positive	Food additive
94	Triethyl phosphate (TEP)	C6H15O4P1	183.076	98.9847 26350.0 127.0165 785.0 80.9739 743.0 155.0462 524.0 153.0903 451.0 184.0897 429.0 186.1864 422.0 128.0681 383.0 128.0750 372.0 142.0741 361.0 127.0188 343.0 153.0701 341.0 155.0870 338.0 152.0565 335.0 128.0611 331.0 100.9900 327.0 141.0661 317.0 97.9693 302.0 167.0632 284.0 169.0981 281.0 dtype: float64	Positive	Industrial chemical
95	Iminostilbene	C14H11N1	194.098	194.0955 17571.0 152.0590 4859.0 152.0615 3938.0 135.0433 3660.0 135.0480 2707.0 195.1004 2390.0 151.0513 2325.0 193.0876 2199.0 151.0589 2041.0 196.0734 1968.0 178.0620 1833.0 151.0538 1815.0 196.0791 1744.0 195.0918 1736.0 179.0765 1726.0 179.0738 1684.0 178.0702 1540.0 163.0356 1385.0 151.0463 1313.0 179.0656 1240.0 dtype: float64	Positive	Pharmaceutical
96	N-[2-(2,4,6-trichlorophenoxy)ethyl]propylamine	C11H14Cl3N1O1	282.023	284.0152 130616.0 282.0185 124017.0 284.1152 65732.0 284.0187 20391.0 282.0219 18696.0 283.0228 11894.0 286.0121 11154.0 285.1199 10022.0 285.0197 7724.0 284.1187 6866.0 222.9492 3203.0 224.9459 2899.0 224.9429 2874.0 168.9172 2512.0 196.9139 2501.0 166.9204 2500.0 239.9734 2454.0 283.0297 2378.0 196.9110 2365.0 285.0231 2210.0 dtype: float64	Positive	Pesticide
97	Thymol	C10H14O1	151.112	151.1117 2717.0 151.1092 2366.0 109.0670 1770.0 123.0806 1583.0 109.0628 1578.0 123.0783 1556.0 123.0761 1271.0 93.0696 1224.0 91.0551 1188.0 105.0715 1173.0 93.0716 1124.0 133.1026 1086.0 105.0652 1016.0 105.0694 998.0 109.0692 961.0 105.0736 894.0 123.0874 891.0 109.1034 868.0 107.0864 860.0 105.0673 818.0 dtype: float64	Positive	Personal care product
98	d-Carvon	C10H14O	151.114	151.1142 2512.0 123.0783 1659.0 109.0628 1649.0 91.0551 1577.0 93.0716 1491.0 93.0696 1439.0 105.0715 1418.0 133.1003 1383.0 93.0736 1346.0 105.0673 1137.0 109.0649 1093.0 151.1066 1061.0 133.1050 1016.0 152.0615 826.0 123.0806 808.0 81.0697 727.0 105.0694 723.0 77.0398 693.0 109.1012 636.0 95.0882 630.0 dtype: float64	Positive	Natural product
99	Gabapentin	C9H17N1O2	172.133	109.1012 10548.0 109.1034 8934.0 154.1226 2193.0 81.0715 1727.0 91.0551 1707.0 91.0531 1610.0 95.0842 1556.0 67.0546 1469.0 67.0563 1414.0 110.1039 1411.0 95.0862 1325.0 67.0529 1302.0 154.1251 1123.0 119.0860 1106.0 93.0716 1079.0 81.0697 1035.0 154.1175 855.0 137.0938 802.0 107.0885 797.0 111.0809 757.0 dtype: float64	Positive	Pharmaceutical
100	Eleutherol	C14H12O4	245.083	203.0692 14862.0 203.0722 6227.0 187.0390 5982.0 245.0787 5481.0 245.0851 5311.0 212.0461 4606.0 184.0508 4357.0 230.0635 3926.0 230.0573 3863.0 212.0490 2574.0 245.0755 2502.0 204.0737 2489.0 213.0515 2416.0 184.0564 2377.0 215.0305 2142.0 188.0423 2026.0 230.0511 2004.0 184.0536 1988.0 227.0687 1834.0 160.0523 1763.0 dtype: float64	Positive	Pesticide
101	Dexibuprofen	C13H18O2	207.14	149.0988 829.0 149.0938 623.0 149.1013 563.0 147.1192 469.0 165.0719 434.0 207.1338 424.0 105.0651 418.0 119.0831 412.0 148.1086 406.0 119.0764 389.0 189.1274 379.0 189.1218 378.0 207.1485 374.0 147.1168 373.0 148.1235 371.0 206.1162 364.0 161.1368 360.0 119.0853 358.0 149.0963 354.0 207.1367 341.0 dtype: float64	Positive	Pharmaceutical
102	Tris(2-chloroethyl) phosphate (TCEP)	C6H12Cl3O4P1	284.961	98.9838 2803.0 160.9784 1585.0 125.0000 1183.0 98.9919 1140.0 160.9732 1119.0 222.9670 643.0 162.9756 610.0 150.1248 577.0 288.0675 491.0 251.1614 491.0 222.9793 474.0 200.1067 454.0 224.9757 451.0 172.1114 436.0 288.1474 436.0 133.1108 432.0 224.9665 401.0 222.9640 392.0 199.0575 372.0 148.1136 343.0 dtype: float64	Positive	Industrial chemical
103	2'-Methoxycinnamaldehyde;	C10H10O2	163.075	163.0749 2985.0 163.0775 2585.0 165.0693 2379.0 163.0801 2016.0 165.0666 1985.0 165.0719 1689.0 165.0745 1411.0 107.0881 1285.0 115.0520 1112.0 163.0618 852.0 164.0771 841.0 91.0558 832.0 105.0756 804.0 91.0519 797.0 107.0796 777.0 164.0666 757.0 135.0797 724.0 115.0542 723.0 163.0644 693.0 164.0614 690.0 dtype: float64	Positive	Food additive
104	Isopimpinellin	C13H10O5	247.064	217.0096 16254.0 217.0126 10773.0 232.0387 3219.0 232.0356 2318.0 189.0145 2306.0 247.0594 2050.0 218.0176 1854.0 161.0246 1832.0 189.0257 1604.0 189.0173 1527.0 232.0294 1068.0 161.0194 987.0 247.0626 926.0 232.0481 906.0 218.0236 871.0 218.0146 693.0 161.0272 652.0 218.0085 633.0 189.0117 608.0 248.0672 553.0 dtype: float64	Positive	Pesticide
105	Ethyl butylacetylaminopropionate	C11H21N1O3	216.161	128.1072 757.0 187.1377 681.0 86.0998 657.0 172.0873 636.0 128.1049 636.0 86.0979 622.0 175.1444 600.0 172.0900 572.0 128.1118 491.0 174.1494 457.0 172.0953 415.0 172.0792 365.0 86.0922 350.0 170.1122 338.0 86.0884 338.0 173.0979 330.0 145.0741 324.0 174.1440 290.0 175.1606 289.0 174.1601 280.0 dtype: float64	Positive	Personal care product
106	Hexa(methoxymethyl)melamine	C15H30N6O6	391.231	177.0884 257867.0 207.0988 105167.0 283.1502 26990.0 178.0920 16643.0 178.0893 11191.0 208.1013 10040.0 253.1403 4455.0 253.1370 3650.0 253.1468 3542.0 284.1497 2753.0 284.1532 2694.0 283.1606 2008.0 177.2219 1995.0 178.0838 1561.0 193.1188 1547.0 329.1873 1368.0 253.1435 1243.0 329.1910 1119.0 329.1948 1046.0 208.1072 1003.0 dtype: float64	Positive	Industrial chemical
107	1-(2,4-Dichlorophenyl)-2-(1,2,4-triazol-1-yl)ethanol	C10H9Cl2N3O1	258.023	125.0157 1456.0 70.0397 1331.0 258.0148 891.0 70.0414 887.0 70.0380 823.0 260.0238 762.0 258.0181 737.0 170.9820 702.0 258.0214 634.0 153.0093 626.0 258.0082 617.0 136.0033 564.0 170.9767 560.0 260.0139 554.0 260.1228 535.0 260.0073 532.0 258.2186 501.0 260.0205 498.0 170.9740 495.0 172.9706 478.0 dtype: float64	Positive	Pesticides
108	Chlorpromazine	C17H19Cl1N2S1	319.104	86.0962 3601.0 319.0999 2027.0 319.1072 1886.0 319.0926 1309.0 246.0183 1273.0 246.0151 1252.0 239.0771 1084.0 321.1026 1047.0 246.0215 991.0 214.0413 982.0 214.0443 944.0 239.0802 943.0 239.0739 926.0 321.0953 880.0 214.0383 811.0 319.1913 811.0 248.0092 624.0 321.1173 534.0 320.1023 534.0 248.0156 530.0 dtype: float64	Positive	Pharmaceutical
109	Metolachlor morpholinone	C14H19N1O2	234.151	234.1508 3053.0 234.1476 1878.0 234.1570 1232.0 120.0818 805.0 120.0908 753.0 148.1080 670.0 146.0952 640.0 135.0813 619.0 235.1696 581.0 146.0976 545.0 235.1539 533.0 235.1476 516.0 148.0732 516.0 206.1163 493.0 160.1118 489.0 235.1413 482.0 235.1602 471.0 175.1331 455.0 235.1664 446.0 148.1180 423.0 dtype: float64	Positive	Pesticide
110	Pterosin B	C14H18O2	219.14	139.0753 3564.0 201.1259 3220.0 201.1317 2796.0 201.1230 2773.0 131.0847 2759.0 159.1164 2518.0 119.0860 2503.0 219.1370 2394.0 119.0838 2330.0 159.1190 2090.0 219.1340 1932.0 219.1431 1870.0 189.0736 1825.0 145.1000 1811.0 219.1400 1646.0 105.0715 1644.0 129.0705 1609.0 105.0694 1556.0 189.0679 1545.0 121.0638 1534.0 dtype: float64	Positive	Natural product
111	Azoxystrobin acid	C21H15N3O5	390.115	372.0942 3602.0 329.0818 2809.0 344.0992 2751.0 372.1060 2586.0 344.1030 2191.0 329.0743 2152.0 329.0780 924.0 344.1182 828.0 373.1013 828.0 372.1179 800.0 373.1053 788.0 372.0784 785.0 373.0974 687.0 373.0934 678.0 329.0669 665.0 330.0883 575.0 373.0894 532.0 345.0981 513.0 448.0005 510.0 393.1879 482.0 dtype: float64	Positive	Pesticide
112	Deisopropylatrazine	C5H8Cl1N5	174.055	174.0569 3017.0 174.0515 1837.0 132.0329 1750.0 176.0578 1699.0 104.0023 1514.0 174.0461 1399.0 96.0565 1337.0 176.0470 1173.0 104.0002 1172.0 176.0551 1097.0 96.0545 1086.0 176.0633 1075.0 146.0210 774.0 106.0028 741.0 176.0524 653.0 146.0185 650.0 79.0046 621.0 131.0870 538.0 134.1079 537.0 128.0681 522.0 dtype: float64	Positive	Pesticide
113	4-phenylbutenone	C10H10O1	147.082	128.0611 3991.0 129.0681 3357.0 128.0634 2437.0 128.0704 1748.0 127.0534 1384.0 91.0531 1028.0 127.0603 990.0 108.9047 823.0 91.0551 779.0 147.0813 734.0 127.0557 669.0 108.9025 643.0 106.9065 639.0 130.0721 625.0 91.0590 620.0 106.9044 594.0 147.0788 487.0 108.9132 419.0 117.0758 402.0 132.0565 374.0 dtype: float64	Positive	Food additive
114	Curcumenol	C15H22O2	235.173	133.1026 1537.0 119.0860 1379.0 207.0340 1262.0 217.1573 1096.0 105.0694 1074.0 189.1580 1019.0 119.0838 1013.0 142.0814 967.0 105.0715 917.0 149.0210 901.0 161.0973 895.0 131.0823 893.0 219.1703 885.0 190.9975 836.0 189.1636 815.0 207.0252 787.0 147.1160 778.0 219.1794 775.0 217.1603 767.0 207.0281 748.0 dtype: float64	Positive	Pharmaceutical
115	Brevilin A	C20H26O5	347.192	191.1135 432.0 350.2406 333.0 349.1846 325.0 218.0996 305.0 349.1770 294.0 173.0925 290.0 143.0873 277.0 211.1192 277.0 247.1279 275.0 351.1985 248.0 83.0592 230.0 351.1832 229.0 347.2756 228.0 169.0970 216.0 123.0768 211.0 201.1384 208.0 351.2215 207.0 247.1407 205.0 305.1521 203.0 dtype: float64	Positive	Natural product
116	Tomatidine	C27H45N1O2	416.352	416.3480 83492.0 416.3521 60091.0 417.3505 19402.0 417.3547 14327.0 398.3367 7427.0 161.1342 6340.0 398.3408 5834.0 255.2080 5449.0 255.2113 4560.0 273.2173 4384.0 161.1316 4261.0 417.3589 3908.0 417.3463 3376.0 399.3460 2799.0 273.2241 2507.0 273.2140 2464.0 399.3501 2343.0 418.3501 2229.0 399.3419 2220.0 398.3449 2179.0 dtype: float64	Positive	Natural product
117	Pteleine	C13H11NO3	230.083	214.0503 3364.0 230.0790 2493.0 215.0575 1940.0 230.0883 1670.0 185.0488 1146.0 214.0533 1054.0 186.0524 1008.0 230.0945 907.0 187.0586 839.0 185.0405 735.0 231.0765 732.0 215.0545 685.0 231.0796 665.0 231.1045 581.0 200.0362 563.0 231.0858 511.0 91.0531 507.0 105.0694 475.0 231.1512 455.0 91.0571 446.0 dtype: float64	Positive	Natural product
118	Curcumol	C15H24O2	237.185	219.1734 11174.0 219.1764 7237.0 163.1113 1883.0 220.1743 1829.0 163.1061 1519.0 159.1190 1509.0 121.0998 1366.0 220.1804 1325.0 207.0281 1294.0 119.0860 1117.0 135.1146 1090.0 107.0864 1088.0 119.0816 1078.0 149.0210 1074.0 107.0822 1065.0 161.0947 1058.0 133.1026 1055.0 133.0979 1024.0 161.0895 934.0 207.0340 918.0 dtype: float64	Positive	Natural product
119	osthenol	C14H14O3	231.102	175.0384 13689.0 175.0411 12106.0 147.0440 4488.0 147.0465 3798.0 176.0415 1717.0 147.0415 1240.0 176.0470 1098.0 176.0388 861.0 119.0481 723.0 189.0567 620.0 199.0360 612.0 119.0548 537.0 53.5687 533.0 91.0551 517.0 199.0273 510.0 148.0458 466.0 176.0334 442.0 91.0610 418.0 144.0690 393.0 189.0060 392.0 dtype: float64	Positive	Natural product
120	Kotanin	C24H22O8	439.141	439.1409 6638.0 439.1194 3669.0 397.1205 2931.0 397.1327 2426.0 365.1036 1902.0 440.1407 1595.0 365.0879 865.0 398.1284 738.0 338.1059 688.0 441.2447 660.0 351.0820 528.0 365.0801 479.0 397.2102 417.0 367.1162 416.0 335.0948 406.0 366.1053 360.0 441.2060 348.0 381.7991 347.0 407.1002 344.0 398.1488 339.0 dtype: float64	Positive	Pharmaceutical
121	N,N-Dimethyltetradecylamine	C16H35N1	242.285	242.2836 7688.0 242.2899 1894.0 243.2880 1408.0 165.0721 975.0 165.0695 783.0 243.1125 508.0 165.0800 501.0 243.0997 443.0 192.9852 421.0 244.2913 414.0 243.1061 414.0 166.0701 385.0 155.0819 377.0 152.0615 375.0 246.1018 365.0 184.0980 343.0 166.0807 334.0 243.2912 332.0 166.0675 324.0 192.9795 323.0 dtype: float64	Positive	Industrial chemical
122	Metolachlor OA	C15H21N1O4	280.156	248.1292 3091.0 149.0238 2770.0 248.1227 2560.0 248.1259 2188.0 149.0213 1947.0 162.1304 1820.0 149.0263 1720.0 162.1278 1453.0 162.1357 1361.0 146.0961 1328.0 146.0936 1121.0 176.1449 1087.0 146.0986 1046.0 248.1388 898.0 175.1010 863.0 91.0538 785.0 204.1411 765.0 174.0954 744.0 147.1019 733.0 174.0900 694.0 dtype: float64	Positive	Pesticide
123	Chromone	C9H6O2	343.117	343.1176 17311.0 313.0677 10361.0 285.0750 6651.0 285.0784 4724.0 313.0714 3767.0 344.1153 3098.0 344.1267 2858.0 295.0600 2551.0 328.0892 2533.0 299.0880 2429.0 327.0781 2355.0 295.0530 2343.0 285.0681 2336.0 279.0639 2324.0 344.1115 2153.0 297.0741 2130.0 328.0929 2097.0 282.0872 2002.0 285.0819 1970.0 327.0892 1931.0 dtype: float64	Positive	Pharmaceutical
124	Climbazole	C15H17Cl1N2O2	293.104	197.0719 10544.0 141.0078 5387.0 199.0677 3341.0 199.0706 3068.0 129.0100 2379.0 293.1088 2344.0 126.9935 2203.0 155.0233 1933.0 155.0258 1856.0 293.1018 1784.0 143.0074 1467.0 225.0718 1353.0 198.0786 1269.0 109.0414 1170.0 131.0074 1123.0 267.0332 1071.0 295.1022 1034.0 157.0222 1026.0 198.0729 996.0 109.0392 962.0 dtype: float64	Positive	Personal care product
125	Triphenylphosphine oxide	C18H15O1P1	279.092	201.0447 65230.0 250.1763 53147.0 279.0946 44435.0 201.0476 23189.0 202.0499 7550.0 280.0972 7146.0 173.0514 5795.0 282.2041 5250.0 149.0210 4818.0 173.0487 2238.0 171.0382 2063.0 183.0361 1613.0 219.0583 1574.0 183.0416 1424.0 154.0794 1180.0 251.1807 1178.0 281.1051 952.0 128.0634 912.0 251.1840 867.0 171.0329 778.0 dtype: float64	Positive	Industrial chemical
126	3-(4Negativeydroxy-5-oxo-3-phenyl-2H-furan-2-yl)propanoic acid	C13H12O5	249.078	-	Positive	Pharmaceutical
127	N,N-Dimethyldodecan-1-amine	C14H31N1	214.252	214.2522 60816.0 215.2596 6623.0 215.2566 5183.0 215.2536 4033.0 214.2552 1268.0 214.2492 1030.0 216.2574 502.0 216.2664 457.0 216.2513 430.0 839.0096 390.0 674.2294 389.0 125.0984 386.0 217.1217 309.0 169.1130 306.0 555.1334 258.0 213.1127 254.0 588.1793 252.0 213.1216 243.0 97.1038 240.0 605.2214 233.0 dtype: float64	Positive	Industrial chemical
128	Traversianal	C20H28O3	317.21	212.2338 6456.0 318.2962 4708.0 256.2657 2228.0 319.1913 1753.0 145.1025 1667.0 317.1763 1505.0 157.0965 1442.0 143.0809 1348.0 317.2055 1304.0 173.1321 1230.0 171.1159 1184.0 157.1042 1179.0 119.0860 1169.0 211.1441 1095.0 213.2397 1072.0 133.1026 1060.0 119.0816 1037.0 131.0870 1019.0 183.1164 977.0 317.1399 977.0 dtype: float64	Positive	Pesticide
129	N,N-Dimethyldodecylamine-N-oxide	C14H31N1O1	230.248	230.2478 164387.0 231.2516 15860.0 212.2355 13129.0 231.2485 8824.0 212.2384 7319.0 231.2579 6286.0 230.3999 2653.0 232.2484 1781.0 213.2381 1689.0 213.2441 1567.0 231.2641 1372.0 232.2639 1085.0 213.2322 1021.0 230.5242 812.0 213.2411 777.0 232.2515 707.0 230.4030 589.0 213.2501 581.0 799.0960 506.0 232.2702 493.0 dtype: float64	Positive	Industrial chemical
130	Terbutylazine	C9H16Cl1N5	230.117	174.0542 35942.0 176.0497 9967.0 146.0210 3755.0 132.0306 2838.0 132.0353 2427.0 174.0569 2425.0 175.0546 1888.0 174.0461 1750.0 138.0779 1591.0 104.0002 1581.0 96.0545 1558.0 230.2467 1451.0 230.1163 1440.0 148.0209 1399.0 175.0627 1340.0 134.0297 1287.0 230.1132 1268.0 148.0259 1256.0 175.0492 1221.0 175.0465 1208.0 dtype: float64	Positive	Pesticide
131	Telmisartan	C33H30N4O2	515.244	515.2486 15101.0 515.2393 8918.0 516.2522 5089.0 497.2360 4607.0 516.2429 3546.0 516.2289 2268.0 516.2708 1547.0 517.2522 1355.0 498.2402 1313.0 517.2615 1233.0 498.2265 1059.0 276.1301 740.0 305.1771 677.0 276.1369 675.0 498.2356 643.0 498.2493 632.0 517.2429 620.0 183.0847 482.0 305.1807 422.0 517.2336 419.0 dtype: float64	Positive	Pharmaceutical
132	3,4-Dihydrocoumarin	C9H8O2	149.061	91.0551 31269.0 152.0615 2225.0 149.0559 1944.0 92.0596 1797.0 149.0584 1241.0 77.0362 1146.0 151.0563 1115.0 77.0398 1017.0 105.0337 861.0 106.0407 852.0 150.0419 738.0 93.0676 692.0 105.0295 686.0 150.0545 667.0 149.0634 657.0 103.0591 652.0 151.0488 650.0 108.9025 550.0 121.0661 491.0 105.0715 447.0 dtype: float64	Positive	Food additive
133	Dimethomorph isomer 1	C21H22ClNO4	388.129	301.0625 338368.0 165.0537 159141.0 303.0613 78506.0 388.1309 57272.0 302.0646 39404.0 303.0578 29086.0 273.0661 27996.0 302.0682 16826.0 138.9956 13957.0 390.1291 13903.0 258.0411 11014.0 166.0569 10844.0 273.0627 10146.0 242.0479 9934.0 389.1314 9178.0 304.0632 8911.0 238.1003 6481.0 275.0649 6014.0 138.9932 5667.0 114.0532 4767.0 dtype: float64	Positive	Pesticide
134	4-Methylbenzylidene camphor	C18H22O	255.175	222.1033 2114.0 207.0307 2004.0 197.1339 1900.0 222.1002 1650.0 157.1030 1539.0 191.0003 1425.0 143.0824 1345.0 197.1367 1260.0 207.0337 1247.0 257.1860 1236.0 225.0401 1230.0 197.1281 1220.0 255.1819 1190.0 159.1148 1183.0 119.0831 1143.0 121.1010 1134.0 142.0783 1131.0 121.1055 1097.0 156.0891 1083.0 255.1721 1062.0 dtype: float64	Positive	Personal care product
135	[6]-Gingerol	C17H26O4	295.192	282.0872 34884.0 297.1129 14292.0 281.0811 13214.0 221.1196 8932.0 221.1166 7881.0 175.1115 5263.0 193.1217 4235.0 193.1188 4186.0 283.0883 3946.0 283.0917 3265.0 139.1115 2915.0 133.1050 2727.0 101.0250 2520.0 298.1226 2315.0 137.0554 2154.0 165.0537 2112.0 254.0919 2080.0 298.1155 1970.0 85.0286 1826.0 298.1120 1778.0 dtype: float64	Positive	Natural product
136	Tetradecyl sulfate	C14H30O4S1	293.18	-	Negative	Industrial chemical
137	Phebalosin	C15H14O4	259.096	259.0941 69803.0 205.0483 57544.0 189.0539 42860.0 217.0487 39988.0 229.0496 26558.0 258.2778 24756.0 202.0237 14061.0 161.0583 13435.0 177.0530 12793.0 201.0563 9815.0 217.0819 8952.0 217.0879 8649.0 260.0997 8425.0 244.0738 8094.0 174.0300 6217.0 203.0692 6068.0 259.2786 5483.0 230.0542 5448.0 231.0609 5201.0 215.0335 5163.0 dtype: float64	Positive	Pharmaceutical
138	Suberosin	C15H16O3	245.119	131.0495 69050.0 189.0539 59877.0 190.0569 6424.0 132.0517 6332.0 103.0528 4503.0 159.0416 3554.0 161.0583 3334.0 190.0597 3117.0 190.0654 2622.0 159.0468 1750.0 161.0636 1658.0 133.0625 1144.0 162.0624 846.0 105.0715 811.0 115.0541 779.0 160.0523 740.0 203.0751 650.0 245.1332 627.0 191.0597 610.0 190.0738 561.0 dtype: float64	Positive	Natural product
139	Osthole	C15H16O3	245.119	131.0495 192130.0 189.0539 151057.0 190.0597 13915.0 132.0517 11276.0 190.0569 11274.0 159.0442 8803.0 103.0528 6522.0 161.0609 6147.0 161.0583 5063.0 133.0625 2384.0 159.0416 1804.0 203.0692 1469.0 203.0751 1270.0 160.0471 1239.0 131.1643 1196.0 105.0694 1161.0 189.1946 1125.0 203.0780 1091.0 160.0523 1090.0 191.0626 1000.0 dtype: float64	Positive	Natural product
140	Irbesartan	C25H28N6O1	427.221	-	Positive/ Negative	Pharmaceutical
141	Fipronil	C12H4Cl2F6N4O1S1	434.929	-	Negative	Pesticide
142	1-Tetradecanamine	C16H35N1O1	258.28	258.2798 38030.0 258.2765 20623.0 259.2837 5136.0 259.2804 4865.0 240.2706 3229.0 225.0708 2758.0 225.0770 2718.0 240.2674 2610.0 240.0962 2531.0 225.0739 2410.0 240.2737 2206.0 240.0898 1944.0 240.2579 1780.0 240.2769 1780.0 211.0627 1736.0 211.0597 1340.0 211.0538 1278.0 240.1025 1261.0 240.0930 1185.0 225.0647 1030.0 dtype: float64	Positive	Industrial chemical
143	Tebufenozide	C22H28N2O2	351.208	-	Negative	Pesticide
144	Fipronil sulfide	C12H4Cl2F6N4S1	418.936	-	Negative	Pesticide
145	Pterostilbene	C16H16O3	257.12	257.1182 10170.0 131.0495 7206.0 169.1008 3978.0 154.0794 3951.0 141.0685 3818.0 225.0718 3524.0 179.0847 3399.0 153.0701 3278.0 197.0977 3215.0 165.0721 3108.0 240.0938 2595.0 240.1002 2573.0 240.0970 2496.0 178.0756 2074.0 178.0811 2049.0 182.0739 2015.0 257.1149 1995.0 166.0754 1813.0 225.0871 1795.0 155.0793 1696.0 dtype: float64	Positive	Natural product
146	Costunolide	C15H20O2	233.154	149.0584 88784.0 163.0748 40093.0 105.0694 29506.0 232.1697 24591.0 233.1529 18118.0 119.0860 12527.0 131.0847 12077.0 233.1592 12032.0 121.0638 10862.0 145.0631 9694.0 117.0691 8712.0 145.1025 7788.0 177.0912 6788.0 131.0870 5968.0 159.0803 5892.0 91.0531 5795.0 150.0620 5719.0 187.1482 5408.0 119.0838 5242.0 115.0519 5108.0 dtype: float64	Positive	Pharmaceutical
147	5-Phenylvaleric acid	C11H14O2	179.106	-	Positive	Natural product
148	Emamectin B1A	C49H75N1O13	886.536	158.1176 331809.0 886.5298 273364.0 887.5291 103848.0 887.5352 68897.0 888.5412 18125.0 159.1199 14308.0 888.5291 13225.0 302.1964 11186.0 302.1928 7806.0 126.0912 5072.0 158.2437 3931.0 126.0935 3383.0 270.1687 2665.0 886.4689 2516.0 868.5111 2341.0 868.5172 2088.0 868.5232 2079.0 886.8283 2071.0 226.1434 1919.0 303.1931 1819.0 dtype: float64	Positive	Pesticide
149	Ritonavir	C37H48N6O5S2	721.324	268.1479 616638.0 296.1437 419097.0 197.0748 318222.0 171.0944 144956.0 426.1798 101428.0 269.1508 54078.0 140.0519 49782.0 297.1447 44852.0 426.1841 35363.0 721.3207 20119.0 198.0758 18603.0 427.1859 18228.0 250.1602 13504.0 270.1455 10814.0 268.3121 10370.0 298.1438 9559.0 270.1522 9439.0 365.1622 8879.0 507.2408 8741.0 296.3127 8419.0 dtype: float64	Positive	Pharmaceutical
150	Lamotrigine	C9H7Cl2N5	256.016	-	Positive	Pharmaceutical
151	Propiconazole	C15H17Cl2N3O2	342.075	158.9771 569449.0 160.9727 359641.0 342.0760 234829.0 158.9745 148844.0 344.0735 145030.0 343.0760 26818.0 159.9772 24658.0 186.9718 18565.0 172.9545 18523.0 204.9780 15311.0 345.0726 15094.0 204.9838 15009.0 161.9764 13368.0 188.9667 11216.0 174.9517 10160.0 159.1035 9361.0 206.9781 9102.0 345.0764 8501.0 162.9729 8351.0 190.9664 7794.0 dtype: float64	Positive	Pesticide
152	Costunolide	C15H20O2	233.157	233.1498 7207.0 215.1445 4480.0 145.1025 3989.0 187.1510 3355.0 159.1190 3341.0 203.1042 3220.0 131.0847 3201.0 119.0860 3137.0 159.0803 2913.0 187.1426 2799.0 173.0971 2708.0 105.0715 2604.0 133.1026 2479.0 235.1759 2224.0 107.0864 1906.0 121.1021 1837.0 189.1608 1644.0 135.0837 1625.0 147.1160 1621.0 157.1017 1606.0 dtype: float64	Positive	Natural product
153	Hydroxycinnamic acid	C9H8O3	165.054	123.0450 31772.0 165.0535 15424.0 165.0561 11426.0 132.0436 6016.0 119.0496 5499.0 147.0448 3456.0 137.0605 3290.0 119.0518 3240.0 137.0558 2994.0 91.0558 2839.0 119.0451 2575.0 109.0662 2522.0 137.0582 2445.0 147.0398 2178.0 147.0423 2121.0 132.0483 2059.0 119.0474 2017.0 147.0498 1966.0 124.0502 1851.0 147.0522 1738.0 dtype: float64	Positive	Pharmaceutical
154	3Negativeydroxycinnamic Acid	C9H8O3	165.056	123.0443 88981.0 165.0564 28105.0 119.0503 6845.0 137.0578 6213.0 109.0649 5817.0 124.0474 5596.0 91.0551 4958.0 147.0465 4822.0 95.0483 4404.0 119.0481 3576.0 166.0596 2836.0 137.0602 2632.0 147.0415 2278.0 124.0497 1907.0 81.0715 1806.0 166.0675 1673.0 132.0447 1444.0 107.0504 1160.0 120.0527 1137.0 166.0701 1136.0 dtype: float64	Positive	Natural product
155	Methyl 2,4-Dihydroxy-3,6-Dimethylbenzoate	C10H12O4	197.082	-	Positive	Personal care product
156	Eplerenone	C24H30O6	415.209	-	Positive	Pharmaceutical
157	Pyroquilon	C11H11N1O1	174.093	-	Positive	Pesticide
158	Norethynodrel	C20H26O2	299.202	-	Positive	Pharmaceutical
159	Betaxolol	C18H29N1O3	308.226	-	Positive	Pharmaceutical
160	Urea, N-propyl-N-[2-(2,4,6-trichlorophenoxy)ethyl]-	C12H15Cl3N2O2	325.026	284.0155 5198.0 282.0191 4622.0 282.0260 4615.0 129.1003 4451.0 284.0293 1633.0 86.0941 1065.0 327.0732 884.0 283.0267 797.0 282.0397 774.0 283.0130 684.0 327.0177 575.0 86.1017 500.0 325.0375 488.0 325.0154 478.0 283.0405 457.0 325.0265 455.0 286.0120 447.0 285.0197 443.0 327.0287 415.0 206.9571 360.0 dtype: float64	Positive	Pesticide
161	Difenoconazole	C19H17Cl2N3O3	406.071	251.0024 1311965.0 253.0003 837996.0 252.9970 186104.0 406.0686 132494.0 252.0052 120541.0 337.0381 75446.0 408.0670 72732.0 254.0005 56524.0 188.0395 54926.0 252.0085 51734.0 339.0360 43838.0 406.0728 38473.0 251.1613 35842.0 264.9805 24007.0 188.0367 23848.0 223.0073 21489.0 253.1565 21044.0 339.0322 20459.0 291.0349 17910.0 407.0755 17817.0 dtype: float64	Positive	Pesticide
162	2-Methoxybenzoic acid	C8H8O3	153.054	-	Positive	Pesticide
163	Aspirin	C9H8O4	181.05	-	Positive	Pharmaceutical
164	Dimethyl phthalate	C10H10O4	195.065	-	Positive	Industrial chemical
165	Diethyl phthalate	C12H14O4	223.098	-	Positive	Personal care product
166	4-Dodecylbenzenesulfonic acid	C18H30O3S1	325.183	-	Negative	Industrial chemical
167	Cryptotanshinone	C19H20O3	297.149	297.1493 446229.0 254.0947 110808.0 251.1420 99948.0 279.1369 77439.0 282.1222 76328.0 298.1518 76090.0 282.1256 68535.0 268.1078 54135.0 267.1037 27262.0 267.1003 24151.0 255.0969 21872.0 249.0905 18996.0 255.1002 17364.0 252.1449 16911.0 221.0952 16354.0 264.1127 15726.0 237.0938 15289.0 252.1481 14881.0 209.0936 14393.0 236.1182 13254.0 dtype: float64	Positive	Natural product
168	Galaxolidone	C18H24O2	273.187	255.1760 1374135.0 255.1727 750470.0 273.1845 565752.0 225.1270 444124.0 256.1773 323315.0 157.1017 244957.0 185.0962 170176.0 240.1478 146916.0 227.1797 113600.0 213.1262 111034.0 197.1322 109140.0 274.1866 105670.0 274.1900 103172.0 171.1159 68731.0 142.0766 67491.0 199.1111 64147.0 255.3329 57866.0 129.0705 56918.0 226.1291 56590.0 240.1509 46758.0 dtype: float64	Positive	Personal care product
169	Phenmedipham	C16H16N2O4	301.116	-	Positive	Pesticide
170	Androstenedione	C19H26O2	287.204	-	Positive	Pharmaceutical
171	dextrorphan	C17H23N1O1	258.191	-	Positive	Pharmaceutical
172	Crotamiton	C13H17N1O1	204.138	-	Positive	Pharmaceutical
173	Isopregnanolone	C21H34O2	319.265	-	Positive	Pharmaceutical
174	Dibutyl phthalate	C16H22O4	277.143	-	Positive/ Negative	Industrial chemical
175	Mianserin N-oxide	C18H20N2O1	279.151	-	Negative	Pharmaceutical
176	Niclosamide	C13H8Cl2N2O4	324.976	-	Negative	Pesticide
177	Tanshinone II	C19H18O3	295.135	277.1203 595445.0 295.1319 474717.0 249.1260 400284.0 252.0766 211941.0 262.0982 179468.0 266.0914 127935.0 280.1086 127312.0 234.1042 111772.0 206.1074 102142.0 235.0756 92371.0 278.1260 86891.0 266.0948 82909.0 249.1293 82898.0 296.1345 79587.0 191.0852 73921.0 265.0845 65968.0 278.1226 54914.0 253.0847 52126.0 250.1314 50339.0 207.0778 49821.0 dtype: float64	Positive	Natural product
178	Epinastine	C16H15N3	250.135	-	Positive	Pharmaceutical
179	Meglutol	C6H10O5	163.062	-	Positive	Pharmaceutical
180	Quinalphos	C12H15N2O3P1S1	299.067	-	Positive	Pesticide
181	4'-METHOXYFLAVONE	C16H12O3	253.088	-	Positive	Natural product
182	Cholic acid	C24H40O5	409.293	-	Positive	Natural product
183	Elaidic Acid	C18H34O2	283.264	232.0675 1050.0 283.1404 964.0 95.0881 934.0 95.0841 862.0 121.1010 841.0 286.1158 707.0 135.1177 679.0 284.3328 639.0 286.0742 594.0 251.0479 591.0 232.0769 572.0 109.1004 564.0 149.1362 549.0 204.0710 542.0 285.1787 531.0 232.0800 514.0 97.1018 507.0 284.3431 498.0 93.0699 497.0 232.0738 486.0 dtype: float64	Positive	Natural product
184	Nonanedioic acid	C9H16O4	189.113	-	Positive	Pesticide
185	Glycocholic acid	C26H43N1O6	466.32	-	Positive	Natural product
186	Imazaquin	C17H17N3O3	310.118	-	Negative	Pesticide
187	Edifenphos	C14H15O2P1S2	311.034	-	Positive	Pesticide
188	Kaempferol	C15H10O6	287.054	-	Positive	Pharmaceutical
189	Glafenine	C19H17Cl1N2O4	373.097	-	Positive	Pharmaceutical
190	Galaxolide	C18H26O1	259.205	175.1115 495865.0 176.1149 46861.0 147.0788 41784.0 259.2061 39116.0 161.0947 30730.0 258.1923 21384.0 133.1003 15425.0 259.2028 14253.0 175.2442 9718.0 119.0860 9530.0 228.1462 9376.0 161.0973 9237.0 189.1270 6705.0 260.2086 5704.0 228.1492 3887.0 148.0831 3704.0 210.1373 3667.0 175.3499 3496.0 129.0705 3430.0 188.1124 3297.0 dtype: float64	Positive	Personal care product
191	Gitoxin	C41H64O14	781.439	-	Positive	Pharmaceutical
192	Methylprednisolone	C22H30O5	375.219	-	Positive	Pharmaceutical
193	Stigmastadienone	C29H48	411.366	-	Positive	Pharmaceutical
194	Butenafine	C23H27N	318.224	-	Positive	Pharmaceutical
195	Quercitrin	C21H20O11	449.123	-	Positive	Natural product
196	Oxiglutatione	C20H32N6O12S2	613.165	-	Positive	Pharmaceutical
197	Nicotiflorin	C27H30O15	595.162	-	Positive	Natural product
198	Furosemide	C12H11Cl1N2O5S1	331.015	-	Positive	Pharmaceutical
199	cis-3-(2,5-Dimethylphenyl)-4Negativeydroxy-8-methoxy-1-azaspiro[4.5]decan-2-one	C18H25N1O3	304.195	-	Positive	Pesticide
200	Lupinine	C10H19N1O1	170.152	-	Positive	Pharmaceutical
201	Tolnaftate	C19H17N1O1S1	308.115	-	Positive	Pesticide
202	L-Glutamic acid	C17H12O6	313.069	-	Positive	Food additive
203	Solasodine	C27H43NO2	414.33	-	Positive	Natural product
204	Lithocholic acid	C24H40O3	377.306	-	Positive	Pharmaceutical
205	Permethrin	C21H20Cl2O3	391.085	-	Positive	Pesticide
206	Bis-(2-ethylhexyl) phthalate	C24H38O4	391.283	149.0260 2193514.0 150.0269 238211.0 149.1459 119382.0 167.0341 85119.0 149.2459 47176.0 149.2109 40192.0 121.0300 34834.0 149.3084 34791.0 149.1784 28790.0 149.0859 26157.0 149.9116 14657.0 151.0287 13276.0 149.8465 10903.0 149.9016 7087.0 168.0353 5888.0 149.8189 5883.0 149.9292 5104.0 71.0849 4401.0 149.3709 3422.0 113.1306 2935.0 dtype: float64	Positive	Industrial chemical
207	4-Methylphthalic anhydride	C9H6O3	163.038	163.0383 140379.0 135.0440 107176.0 133.0282 80747.0 77.0377 54783.0 92.0248 28854.0 92.0267 27492.0 105.0337 20114.0 105.0316 19485.0 120.0204 12656.0 164.0430 9605.0 136.0468 7071.0 134.0307 5404.0 136.0492 5404.0 79.0549 4507.0 165.0719 3592.0 78.0394 2765.0 78.0412 2566.0 79.0585 2473.0 78.0467 2094.0 107.0478 2064.0 dtype: float64	Positive	Pharmaceutical
208	Glycerol 1-monostearate	C21H42O4	359.316	341.3043 11170.0 95.0862 8567.0 109.1012 5859.0 123.1169 4028.0 81.0697 2860.0 97.1003 2619.0 342.3107 2396.0 285.2823 2389.0 85.1022 2127.0 267.2673 1971.0 83.0886 1629.0 137.1345 1612.0 358.2424 1605.0 111.1176 1488.0 358.2579 1435.0 326.9633 1346.0 326.9781 1161.0 358.3625 1073.0 360.3293 1058.0 359.2463 953.0 dtype: float64	Positive	Food additive
209	Deoxycholic acid	C24H40O4	393.305	-	Positive	Natural product
210	Dodemorph	C18H35N1O1	282.28	-	Positive	Pesticide
211	Erucamide	C22H43N1O1	338.343	338.3392 8938.0 321.3153 3640.0 97.1023 3496.0 135.1194 3198.0 121.1021 3002.0 303.3036 2869.0 149.1309 2519.0 95.0862 2437.0 111.1154 2417.0 109.0991 2394.0 114.0903 2274.0 339.3450 1880.0 125.0980 1814.0 128.1075 1758.0 107.0864 1704.0 100.0769 1553.0 139.1139 1511.0 163.1479 1346.0 339.3639 1332.0 81.0697 1245.0 dtype: float64	Positive	Industrial chemical
212	Diethanolamine	C4H11N1O2	106.089	88.0746 322.0 70.0637 212.0 dtype: float64	Positive	Personal care product
213	Maltose	C12H22O11	341.108	-	Negative	Food additive
214	Bufexamac	C12H17N1O3	224.126	224.1295 612.0 165.0535 497.0 165.0509 364.0 91.0597 343.0 224.1417 274.0 225.1353 246.0 997.5184 237.0 224.1172 237.0 224.1111 236.0 165.0640 230.0 77.0377 206.0 dtype: float64	Positive	Pharmaceutical
215	4-Guanidinobutyric acid	C5H11N3O2	146.094	106.9086 411.0 146.0902 317.0 150.0670 271.0 106.9022 249.0 87.0482 242.0 108.9025 237.0 106.9149 236.0 106.9044 233.0 86.0639 221.0 108.9068 211.0 121.0661 205.0 dtype: float64	Positive	Natural product
216	Matrine	C15H24N2O	249.197	249.1965 30909.0 250.1958 4846.0 247.1816 1700.0 247.1752 1592.0 148.1130 1172.0 148.1180 1040.0 176.1094 723.0 251.2034 618.0 148.1105 612.0 150.1272 581.0 251.2099 558.0 152.1373 471.0 149.1134 471.0 250.2152 459.0 248.1864 455.0 176.1013 453.0 247.1848 451.0 249.2224 377.0 249.1642 374.0 218.1566 360.0 dtype: float64	Positive	Pharmaceutical
217	Myosmine	C9H10N2	147.092	147.0919 3926.0 147.0895 3544.0 147.0969 1281.0 148.0887 510.0 119.0786 435.0 148.0961 374.0 104.0442 344.0 148.1011 293.0 118.0605 281.0 121.0762 275.0 133.0801 258.0 124.7554 255.0 149.1237 247.0 104.0567 229.0 131.0604 228.0 dtype: float64	Positive	Natural product
218	Methcathinone	C10H13N1O1	164.109	131.0730 5124.0 146.0952 3831.0 164.1060 2911.0 130.0651 2156.0 148.0732 1950.0 148.0782 1781.0 164.1139 1706.0 149.0859 986.0 132.0776 544.0 133.0531 490.0 147.0986 474.0 147.1061 461.0 132.0823 448.0 130.0768 448.0 165.1142 414.0 147.0937 411.0 133.0578 399.0 132.0706 275.0 211.0817 229.0 dtype: float64	Positive	Pharmaceutical
219	Levosulpiride	C15H23N3O4S	342.147	342.1441 33217.0 214.0144 11727.0 342.1479 10277.0 214.0174 6339.0 112.1121 5579.0 343.1442 4449.0 343.1594 3400.0 344.1495 1835.0 344.1381 1415.0 215.0185 1232.0 343.1518 945.0 215.0215 725.0 216.0099 580.0 344.1647 472.0 344.1419 446.0 216.0219 435.0 113.1132 413.0 345.1487 382.0 344.1457 343.0 345.1677 342.0 dtype: float64	Positive	Pharmaceutical
220	2,3,4,9-tetrahydro-1H-pyrido[3,4-b]indol-1-one	C11H10N2O1	187.085	187.0846 2847.0 187.0902 1200.0 144.0679 550.0 159.0967 452.0 159.0916 386.0 155.0607 380.0 187.0706 316.0 98.9777 309.0 157.0696 305.0 130.0738 266.0 188.0906 264.0 158.0893 261.0 188.0878 247.0 461.1963 243.0 158.0841 238.0 794.5738 234.0 144.0753 227.0 132.0907 220.0 157.0799 212.0 188.0793 211.0 dtype: float64	Positive	Natural product
221	Decyldimethylamine	C12H27N1	186.224	186.2236 3860.0 186.2208 3842.0 186.2153 3115.0 186.2264 3098.0 114.1278 2711.0 186.2320 1617.0 144.1760 1473.0 144.1785 1213.0 144.1735 963.0 144.1711 878.0 187.2273 759.0 142.1539 691.0 187.2329 621.0 142.1564 596.0 142.1661 579.0 144.0802 514.0 187.2301 502.0 187.2217 489.0 186.2348 482.0 80.2527 450.0 dtype: float64	Positive	Industrial chemical
222	Gabapentin-lactam	C9H15N1O1	154.122	154.1226 8346.0 98.0605 5144.0 98.0584 2778.0 155.1303 924.0 83.0476 858.0 155.1175 716.0 123.0829 716.0 83.0495 700.0 123.0783 655.0 136.1155 603.0 112.1142 488.0 155.1227 443.0 155.1277 423.0 98.0564 422.0 99.0641 422.0 72.9378 383.0 154.1201 358.0 112.1099 357.0 72.9465 349.0 138.0900 347.0 dtype: float64	Positive	Pharmaceutical
223	Varenicline	C13H13N3	212.119	212.1176 13430.0 195.0889 10022.0 212.1146 3234.0 195.0918 2952.0 213.1262 1816.0 213.1172 1666.0 196.0906 1511.0 212.1057 1491.0 196.0992 1164.0 214.0833 958.0 213.1292 949.0 212.1325 673.0 168.0831 563.0 213.1053 516.0 214.1012 499.0 214.1162 466.0 168.0778 465.0 214.1222 464.0 212.7977 460.0 214.1252 390.0 dtype: float64	Positive	Pharmaceutical
224	Terephthalic acid	C8H6O4	165.018	-	Negative	Industrial chemical
225	6-Phenyl-1,3,5-triazine-2,4-diamine	C9H9N5	188.093	188.0934 3162.0 188.0990 1410.0 188.0906 1386.0 104.0484 1355.0 188.0962 1228.0 188.0878 1111.0 104.0546 784.0 988.3570 712.0 189.0993 605.0 85.0531 383.0 189.0936 382.0 164.0640 373.0 188.1074 355.0 85.0550 352.0 130.0691 349.0 190.0994 349.0 146.0763 333.0 191.0739 328.0 188.1355 326.0 160.0478 313.0 dtype: float64	Positive	Industrial chemical
226	3,4-Dimethoxysalicylic acid	C9H10O5	199.06	126.0107 1653.0 128.0264 1017.0 157.0555 964.0 157.0504 865.0 128.0079 664.0 199.0620 614.0 181.0564 606.0 96.9612 592.0 181.0592 576.0 181.0481 563.0 199.0591 553.0 98.9603 548.0 98.9643 542.0 128.0032 504.0 181.0536 503.0 144.0297 498.0 181.0647 486.0 122.0814 479.0 159.0545 421.0 98.9725 417.0 dtype: float64	Positive	Pharmaceutical
227	Sulfathiazole	C9H9N3O2S2	256.019	256.0127 1938.0 256.0160 1454.0 258.0168 1353.0 256.0094 1167.0 258.0103 970.0 258.0070 835.0 158.9780 443.0 256.0913 398.0 256.0258 364.0 146.0862 358.0 210.9795 353.0 158.9600 336.0 258.0201 332.0 257.0187 285.0 183.0875 280.0 257.0253 266.0 256.1699 258.0 213.9947 253.0 143.0702 245.0 257.0121 243.0 dtype: float64	Positive	Pharmaceutical
228	Senkirkine	C19H27NO6	366.194	366.1914 9168.0 366.1875 8023.0 168.1016 2911.0 367.1907 2151.0 367.1985 1839.0 168.0990 1602.0 168.1069 1498.0 367.1828 1186.0 367.2064 1067.0 150.0871 852.0 150.0946 603.0 368.1992 533.0 153.1005 511.0 367.1593 489.0 368.2149 454.0 133.0672 407.0 121.0706 396.0 368.1913 375.0 369.2012 372.0 368.1756 367.0 dtype: float64	Positive	Natural product
229	Dicyclohexylamine	C12H23N1	182.189	182.1927 14922.0 182.1899 10931.0 100.1138 4685.0 125.0614 3302.0 183.1940 2408.0 125.0591 2185.0 83.0868 2179.0 183.2023 1315.0 183.1884 1235.0 153.0701 1023.0 100.1179 982.0 141.0709 879.0 153.0676 874.0 153.0625 868.0 165.0721 772.0 182.2037 766.0 98.9745 764.0 128.0658 758.0 153.0549 701.0 152.0666 680.0 dtype: float64	Positive	Industrial chemical
230	5Negativeydroxyadamantan-2-one	C10H14O2	167.107	107.0864 2227.0 149.0959 2130.0 109.0628 1772.0 141.0758 1319.0 167.1108 1113.0 149.0984 1001.0 149.0909 975.0 141.0709 966.0 152.0641 955.0 166.0728 940.0 167.1055 862.0 91.0551 847.0 139.0535 845.0 97.9693 839.0 167.0791 809.0 141.0734 797.0 165.0721 780.0 128.0658 777.0 141.0685 776.0 165.0669 757.0 dtype: float64	Positive	Industrial chemical
231	Fenuron	C9H12N2O1	165.103	165.0721 646.0 165.0695 588.0 97.9713 562.0 84.9607 347.0 165.0827 344.0 107.0843 294.0 91.0590 293.0 165.0800 288.0 164.0667 285.0 167.1029 273.0 165.0669 272.0 255.0355 256.0 139.0535 245.0 132.0517 244.0 165.1037 241.0 108.0883 233.0 164.0588 220.0 135.0718 220.0 165.0616 218.0 164.0641 206.0 dtype: float64	Positive	Pesticide
232	Terbutylazine-2Negativeydroxy	C9H17N5O1	212.152	170.1015 1076.0 170.1069 923.0 212.1460 790.0 212.1490 578.0 128.0539 574.0 170.1042 524.0 128.0632 415.0 212.1371 389.0 171.1171 244.0 471.8685 231.0 966.7738 221.0 170.0909 220.0 170.0962 204.0 929.1555 203.0 851.0475 203.0 dtype: float64	Positive	Pesticide
233	Alibendol	C13H17N1O4	252.125	234.1167 1815.0 252.1254 1267.0 252.1286 1005.0 234.1042 970.0 191.0710 958.0 234.1135 798.0 252.1189 637.0 252.1124 613.0 252.1221 541.0 252.1384 537.0 206.0809 511.0 176.0472 480.0 206.0986 440.0 163.0697 423.0 235.1195 373.0 204.0681 371.0 253.1335 325.0 252.1416 321.0 234.1292 306.0 204.0768 304.0 dtype: float64	Positive	Pharmaceutical
234	Cinnamamide	C9H9N1O1	148.079	130.0651 1644.0 130.0675 1428.0 130.0628 1215.0 103.0528 1161.0 148.0757 886.0 131.0519 882.0 103.0508 880.0 131.0448 857.0 131.0472 812.0 103.0549 792.0 106.9065 722.0 148.0732 461.0 108.9111 457.0 148.0806 424.0 148.0881 415.0 152.0641 412.0 108.9025 388.0 133.0578 364.0 133.0554 360.0 133.0507 357.0 dtype: float64	Positive	Food additive
235	8Negativeydroxychinolin	C9H7N1O1	146.059	118.0654 6030.0 117.0581 4269.0 118.0632 4206.0 117.0559 944.0 119.0682 735.0 108.9089 497.0 146.0605 462.0 106.9044 462.0 118.0721 458.0 128.0472 452.0 119.0637 434.0 128.0542 339.0 116.0462 335.0 106.9022 329.0 108.9047 314.0 106.9065 312.0 106.9149 289.0 116.0506 275.0 116.0528 249.0 146.0581 246.0 dtype: float64	Positive	Industrial chemical
236	Quinoline-N-oxide	C9H7N1O1	146.059	128.0495 12495.0 146.0581 2740.0 146.0605 1807.0 129.0542 999.0 147.0639 586.0 129.0472 514.0 108.9025 510.0 115.0519 509.0 106.9065 460.0 106.9044 458.0 129.0612 417.0 106.9022 396.0 115.0607 359.0 106.9086 341.0 161.1856 307.0 106.9107 283.0 115.0541 269.0 147.0366 266.0 108.9047 246.0 147.0564 246.0 dtype: float64	Positive	Industrial chemical
237	Pterosin G	C14H18O3	235.132	119.0860 1424.0 123.0806 1172.0 147.1160 1089.0 189.1299 1044.0 175.1088 1003.0 133.1026 970.0 235.1382 922.0 190.1613 889.0 189.1214 868.0 143.0857 862.0 157.1017 843.0 175.1142 841.0 131.0823 829.0 161.0921 808.0 128.0588 808.0 190.1641 801.0 219.1431 800.0 192.0624 764.0 149.0210 760.0 237.0689 757.0 dtype: float64	Positive	Natural product
238	Tetra(methoxymethyl)melamine (TMMM)	C11H22N6O4	303.175	165.0879 38450.0 195.0975 8467.0 166.0886 2450.0 196.0935 961.0 196.1021 822.0 196.1393 718.0 150.0595 502.0 241.1414 475.0 138.0779 464.0 136.0582 443.0 303.1255 421.0 305.1382 408.0 241.1509 389.0 196.1135 389.0 122.0407 299.0 148.0582 272.0 230.0759 265.0 181.1170 264.0 175.1169 262.0 195.0546 262.0 dtype: float64	Positive	Industrial chemical
239	Benzo[g]quinoline	C13H9N1	180.08	180.0802 367652.0 179.0710 43416.0 152.0615 34003.0 181.0839 33263.0 178.0647 19469.0 179.0738 14257.0 152.0590 13202.0 151.0538 10645.0 153.0650 6767.0 152.0641 4645.0 180.2148 3894.0 153.0751 3755.0 177.0585 2339.0 154.0642 2129.0 154.0667 2123.0 182.0849 2029.0 182.0905 1914.0 177.0612 1851.0 127.0534 1824.0 177.0558 1801.0 dtype: float64	Positive	Industrial chemical
240	(E)-3-(4Negativeydroxyphenyl)acrylaldehyde	C9H8O2	149.059	149.0638 1000.0 149.0588 943.0 91.0519 518.0 152.0664 461.0 105.0735 311.0 77.0413 310.0 121.0627 267.0 152.0537 252.0 93.0759 245.0 151.0538 231.0 93.0719 227.0 131.0557 226.0 93.0660 207.0 dtype: float64	Positive	Natural product
241	N-Acetyltryptamine	C12H14N2O	203.116	203.1159 2324.0 202.0731 1700.0 202.0819 1652.0 105.0694 1265.0 119.0860 1195.0 188.0928 1175.0 145.1025 1017.0 117.0691 980.0 203.0809 978.0 118.0632 910.0 147.0788 907.0 144.0887 887.0 128.0611 856.0 131.0847 846.0 142.0766 796.0 115.0541 793.0 129.0681 780.0 161.0973 740.0 144.0813 736.0 129.0728 733.0 dtype: float64	Positive	Pharmaceutical
242	Benzothiazole-2-sulfonic acid	C7H5N1O3S2	213.964	-	Negative	Industrial chemical
243	1NegativeYDROXYPHENAZINE	C12H8N2O	197.073	197.0735 5413.0 198.1924 1308.0 198.0743 1115.0 198.1982 884.0 156.0865 771.0 198.2068 711.0 198.1895 680.0 158.0481 630.0 169.0784 597.0 168.0636 567.0 169.0704 548.0 156.1734 502.0 167.0863 453.0 158.0558 439.0 198.0772 435.0 168.0689 431.0 200.1067 392.0 153.0798 370.0 169.0811 363.0 198.0830 360.0 dtype: float64	Positive	Natural product
244	Ethirimol	C11H19N3O1	210.16	210.1610 22371.0 210.1580 7984.0 140.1077 4474.0 140.1052 3600.0 182.1264 2706.0 193.1331 2242.0 211.1620 2178.0 211.1709 1840.0 211.1649 1724.0 211.1560 1659.0 152.0868 1611.0 182.1208 1537.0 165.1037 1513.0 165.1011 1390.0 182.1291 1296.0 165.0984 1272.0 182.1347 1149.0 140.1125 1142.0 182.1236 1039.0 211.1679 930.0 dtype: float64	Positive	Pesticide
245	6-Methylcoumarin	C10H8O2	161.061	161.0615 2833.0 161.0589 1111.0 162.0914 1006.0 115.0542 892.0 161.0719 862.0 144.0827 830.0 144.0851 807.0 132.0460 805.0 105.0735 769.0 144.0802 741.0 117.0578 702.0 105.0714 628.0 145.0593 626.0 145.0716 603.0 163.0540 593.0 165.0666 581.0 115.0520 581.0 145.0667 575.0 142.0637 569.0 142.0612 551.0 dtype: float64	Positive	Natural product
246	6-Methoxyquinoline	C10H9N1O1	160.076	142.0644 42453.0 160.0756 14710.0 115.0541 9857.0 140.0495 8837.0 115.0519 7273.0 143.0662 3762.0 116.0506 3244.0 141.0588 2159.0 161.0765 1550.0 141.0564 1499.0 145.0631 841.0 129.0705 822.0 161.0791 790.0 117.0603 769.0 161.0636 722.0 128.0611 675.0 127.0396 639.0 161.0558 589.0 117.0514 576.0 117.0669 562.0 dtype: float64	Positive	Industrial chemical
247	Indole-3-acetic acid	C10H9N1O2	176.069	176.0660 7846.0 143.0368 5523.0 178.0756 4570.0 158.0598 4515.0 177.0694 2637.0 179.0847 1952.0 115.0410 1828.0 152.0641 1643.0 144.0445 1286.0 105.0694 1169.0 130.0278 1095.0 150.0470 1005.0 151.0614 997.0 119.0838 989.0 115.0541 972.0 91.0531 970.0 161.0480 888.0 144.0371 834.0 128.0634 821.0 142.0814 790.0 dtype: float64	Positive	Natural product
248	Phentermine	C10H15N1	150.13	105.0693 1451.0 152.0588 1407.0 152.0613 1390.0 91.0558 1025.0 150.1323 847.0 150.1298 833.0 133.0990 774.0 150.1273 756.0 106.0658 720.0 103.0615 717.0 151.0563 699.0 152.0714 633.0 106.0679 547.0 91.0538 525.0 105.0798 492.0 153.0697 412.0 93.0739 407.0 121.0357 405.0 153.0747 401.0 153.0646 399.0 dtype: float64	Positive	Pharmaceutical
249	4-Isopropylbenzyl alcohol	C10H14O1	151.112	151.1116 1041.0 109.0662 611.0 133.1014 592.0 105.0672 565.0 152.0638 561.0 151.1091 531.0 81.0741 514.0 152.0714 504.0 91.0578 483.0 105.0714 437.0 123.0836 434.0 91.0519 432.0 151.1192 419.0 152.0588 414.0 121.0312 398.0 128.0655 391.0 105.0735 386.0 105.0693 371.0 109.0683 349.0 153.0722 326.0 dtype: float64	Positive	Food additive
250	Dihydromethysticin	C15H16O5	277.107	-	Positive	Pharmaceutical
251	Indoline	C8H9N1	120.081	-	Positive	Pharmaceutical
252	Mexacarbate	C12H18N2O2	223.147	223.1448 1326.0 223.1387 1245.0 150.0921 811.0 136.0750 636.0 226.0830 622.0 150.0971 560.0 223.1326 553.0 180.0912 538.0 226.0799 530.0 211.1501 528.0 226.0737 513.0 154.0845 490.0 226.0768 444.0 107.0822 442.0 149.0959 437.0 182.0739 435.0 178.1193 433.0 153.0751 428.0 150.0871 421.0 196.1049 421.0 dtype: float64	Positive	Pesticide
253	Hexazinone	C12H20N4O2	253.166	171.0876 3514.0 171.0903 3195.0 171.0823 2957.0 171.1010 1033.0 172.0927 571.0 172.0873 524.0 172.0846 369.0 211.0805 366.0 252.0604 360.0 256.1339 354.0 253.1725 348.0 236.0774 339.0 181.0777 337.0 190.0430 331.0 195.1081 331.0 172.0900 311.0 253.1660 297.0 926.6874 288.0 254.0555 285.0 182.0922 282.0 dtype: float64	Positive	Pesticide
254	Pyracarbolid	C13H15N1O2	218.116	-	Positive	Pesticide
255	Dimethyl telluride	C10H7Cl2N3O1	256.006	158.9780 9999.0 158.9754 9490.0 158.9729 7247.0 160.9706 5971.0 160.9732 5700.0 160.9784 4724.0 158.9806 2205.0 256.0029 2175.0 258.0037 1428.0 255.9996 1329.0 257.1270 1298.0 186.9698 1215.0 256.0094 1188.0 159.9805 1164.0 258.0004 1107.0 162.9730 920.0 161.9820 883.0 257.9971 867.0 123.0019 750.0 188.9671 733.0 dtype: float64	Positive	Industrial chemical
256	Alantolactone	C15H20O2	233.154	215.1415 2084.0 215.1355 1928.0 159.0803 1584.0 173.0944 991.0 185.0934 844.0 187.1482 648.0 145.1000 619.0 233.1529 614.0 186.0998 605.0 145.1074 593.0 187.1118 586.0 158.0984 565.0 157.0734 561.0 157.1042 560.0 200.1172 531.0 232.0886 531.0 171.0757 519.0 216.1452 512.0 160.0833 505.0 235.0880 505.0 dtype: float64	Positive	Natural product
257	9,10-Phenanthrenedione	C14H8O2	209.058	152.0615 11934.0 152.0641 7141.0 152.0590 6983.0 181.0647 6216.0 153.0650 4907.0 181.0702 3754.0 153.0701 3477.0 181.0619 3127.0 151.0563 2063.0 151.0538 1181.0 209.0589 1091.0 165.0695 866.0 209.1062 816.0 182.0656 801.0 181.0674 688.0 154.0769 673.0 150.0470 653.0 182.0712 648.0 165.0669 644.0 165.0721 634.0 dtype: float64	Positive	Pesticide
258	Buphedrone	C11H15N1O1	178.122	180.1428 1175.0 178.0836 984.0 178.0754 954.0 180.1345 877.0 110.0620 777.0 132.0836 665.0 165.0666 631.0 131.0744 618.0 150.0922 617.0 177.0667 492.0 124.0844 483.0 131.0838 470.0 150.0872 466.0 121.1100 461.0 130.0738 459.0 132.0766 441.0 124.0707 424.0 131.0885 403.0 122.0620 399.0 122.0688 384.0 dtype: float64	Positive	Pharmaceutical
259	Fenthion sulfone	C10H15O5P1S2	311.024	124.9813 1302.0 124.9790 1011.0 124.9882 707.0 139.0197 647.0 200.0043 627.0 109.0051 607.0 311.0181 559.0 246.9661 553.0 278.9853 463.0 278.9887 458.0 105.0736 451.0 295.1936 450.0 278.9989 421.0 200.0130 413.0 137.0411 390.0 278.9955 387.0 311.0073 380.0 311.1336 376.0 199.9957 375.0 311.0145 374.0 dtype: float64	Positive	Pesticide
260	Valerophenone	C11H14O1	163.112	105.0693 1056.0 165.0719 922.0 165.0666 907.0 105.0735 771.0 165.0745 720.0 91.0538 668.0 105.0672 634.0 107.0859 589.0 91.0519 582.0 107.0923 575.0 145.1012 569.0 107.0838 482.0 165.0693 479.0 119.0875 423.0 130.0785 419.0 145.0987 406.0 91.0578 401.0 119.0853 391.0 107.0902 384.0 93.0699 365.0 dtype: float64	Positive	Natural product
261	Olivetol	C11H16O2	181.125	181.1225 9174.0 181.1198 7674.0 181.1253 6869.0 163.1113 6345.0 135.1146 5620.0 135.1170 5368.0 145.1000 3077.0 107.0864 2920.0 121.1021 2066.0 135.1194 1653.0 163.1087 1533.0 139.0753 1350.0 119.0860 1215.0 136.1203 1163.0 93.0696 1099.0 91.0531 1021.0 93.0736 998.0 139.0728 991.0 182.1264 991.0 164.1113 933.0 dtype: float64	Positive	Natural product
262	N,N-Dimethyldecylamine oxide	C12H27N1O1	202.216	202.2157 24038.0 184.2063 4158.0 203.2151 2410.0 203.2180 1232.0 184.1980 976.0 184.2036 955.0 203.2238 933.0 184.2119 854.0 100.9571 501.0 185.2103 487.0 203.2326 446.0 154.0870 422.0 202.2070 422.0 203.2297 359.0 157.0863 357.0 202.0760 354.0 156.0799 337.0 115.0651 316.0 176.0741 309.0 106.0365 298.0 dtype: float64	Positive	Industrial chemical
263	9-Fluorenone	C13H8O1	181.067	181.0647 23770.0 152.0590 21206.0 153.0676 12595.0 152.0641 5125.0 151.0538 3823.0 182.0684 2774.0 181.0729 2262.0 154.0718 1389.0 151.0639 1297.0 142.0790 1268.0 154.0794 1253.0 154.0692 944.0 141.0685 755.0 98.9765 754.0 150.0419 748.0 180.0802 731.0 150.0470 690.0 150.0444 669.0 150.0545 576.0 153.0853 541.0 dtype: float64	Positive	Industrial chemical
264	Bisphenol A	C15H16O2	229.122	232.2071 559.0 228.2327 428.0 232.2009 362.0 232.2227 337.0 137.0123 292.0 92.0753 259.0 145.0976 258.0 184.2036 241.0 184.2119 226.0 95.0962 225.0 147.1011 220.0 154.1124 216.0 81.0752 204.0 88.0766 203.0 117.0758 201.0 dtype: float64	Positive	Industrial chemical
265	Naphthalene-2-sulfonic acid	C10H8O3S1	207.012	-	Negative	Industrial chemical
266	N-Demethoxylinuron	C8H8Cl2N2O1	216.994	-	Positive/ Negative	Pesticide
267	3,4-Dichloroaniline	C6H5Cl2N1	161.99	-	Positive	Industrial chemical
268	Tryptanthrine	C15H8N2O2	249.071	249.0641 6854.0 130.0278 1745.0 250.0663 1093.0 221.0710 826.0 250.0825 779.0 166.0701 484.0 207.1282 458.0 231.1512 448.0 250.0534 395.0 130.0301 350.0 193.1075 346.0 135.0528 336.0 80.0613 320.0 191.1135 315.0 131.0331 298.0 147.1235 285.0 166.0622 280.0 233.1185 272.0 221.0740 267.0 107.0843 262.0 dtype: float64	Positive	Natural product
269	Flutamide	C11H11F3N2O3	277.083	199.0302 13918.0 277.0744 7238.0 149.0210 5289.0 279.0946 3051.0 201.0447 2980.0 200.0333 1688.0 278.0802 1532.0 152.0590 1526.0 278.0870 1459.0 280.0938 613.0 150.0269 577.0 153.0701 513.0 121.0255 507.0 202.0557 388.0 173.0541 317.0 135.0885 288.0 280.1041 267.0 173.0460 249.0 150.0169 245.0 166.8992 241.0 dtype: float64	Positive	Pharmaceutical
270	1-cyclohexyl-3-phenyl-urea	C13H18N2O	219.149	94.0653 2429.0 94.0693 1599.0 137.0698 1229.0 219.1461 1022.0 94.0732 819.0 219.1491 814.0 219.1522 775.0 219.1400 582.0 202.0819 418.0 72.2230 380.0 219.1613 379.0 147.1086 378.0 219.1340 368.0 120.0460 367.0 201.0998 358.0 221.1288 313.0 141.0734 305.0 205.1098 289.0 119.0905 286.0 77.0416 284.0 dtype: float64	Positive	Pesticide
271	Clomipramine	C19H23Cl1N2	315.162	315.1507 554.0 317.2099 489.0 315.1616 322.0 316.2268 301.0 137.0965 300.0 355.5562 299.0 242.9483 257.0 255.1296 249.0 206.0604 246.0 128.0701 243.0 112.1149 234.0 212.1252 225.0 241.0863 212.0 201.0919 210.0 193.0559 205.0 315.1471 203.0 dtype: float64	Positive	Pharmaceutical
272	Diphenamid	C16H17N1O1	240.141	105.0714 2100.0 105.0693 1727.0 105.0651 1398.0 122.1050 609.0 187.0846 561.0 242.2918 445.0 105.0672 374.0 91.0519 365.0 215.0975 358.0 243.1046 346.0 91.0538 333.0 183.0764 333.0 242.2854 328.0 243.1269 311.0 103.0553 307.0 103.0573 289.0 106.0763 263.0 99.0266 260.0 142.0783 260.0 117.0777 258.0 dtype: float64	Positive	Pesticide
273	5,6-Benzoflavone	C19H12O2	273.089	-	Positive	Industrial chemical
274	BENZYLDIPHENYLPHOSPHINE OXIDE	C19H17O1P1	293.111	293.1088 31984.0 294.1117 6512.0 294.1152 5565.0 91.0551 5178.0 201.0447 4253.0 201.0476 4036.0 294.0976 2983.0 202.0528 984.0 183.0361 725.0 202.0499 711.0 183.0389 703.0 175.0438 687.0 295.1198 592.0 295.1092 556.0 295.1268 545.0 295.1127 527.0 183.0278 484.0 155.0895 480.0 295.1022 458.0 294.2064 452.0 dtype: float64	Positive	Industrial chemical
275	Normeperidine	C14H19N1O2	234.151	176.9877 3965.0 234.1480 2378.0 176.9959 2188.0 178.9858 2051.0 234.1574 1517.0 161.9612 1514.0 176.1395 1336.0 161.9690 1164.0 163.9592 1050.0 176.1504 931.0 148.1111 842.0 160.1100 824.0 131.0721 783.0 130.0645 738.0 132.0860 715.0 130.0691 705.0 133.0872 663.0 131.0791 659.0 163.9697 657.0 133.0990 650.0 dtype: float64	Positive	Pharmaceutical
276	Xanthone	C13H8O2	197.059	152.0615 14913.0 153.0676 11220.0 197.0575 5746.0 197.0633 5521.0 151.0538 3355.0 151.0563 2894.0 141.0685 2718.0 200.1230 1881.0 98.9603 1801.0 154.0743 1721.0 115.0541 1532.0 115.0607 1273.0 154.0692 1256.0 116.9474 1244.0 200.1114 1162.0 116.9518 1082.0 168.0565 1014.0 157.9775 960.0 127.0511 908.0 198.0585 858.0 dtype: float64	Positive	Pharmaceutical
277	cis-Resveratrol	C14H12O3	229.091	229.0819 730.0 229.0788 626.0 152.0638 519.0 152.0689 508.0 155.0912 508.0 229.0912 463.0 228.2219 449.0 141.0704 435.0 152.0613 424.0 201.0919 387.0 153.0722 381.0 158.0790 361.0 229.1005 348.0 168.0557 305.0 718.7927 304.0 201.0977 303.0 228.2620 296.0 139.0534 277.0 186.0701 276.0 201.1036 256.0 dtype: float64	Positive	Natural product
278	Dicyclohexylurea	C13H24N2O1	225.2	225.1977 15250.0 100.1117 6525.0 143.1176 6120.0 208.0334 3623.0 192.0028 2938.0 193.0023 2290.0 209.0263 2197.0 209.0322 1958.0 226.0491 1953.0 226.1968 1753.0 207.0369 1669.0 226.2030 1659.0 191.0032 1556.0 226.0399 1494.0 211.0044 1451.0 227.0348 1380.0 226.1999 1278.0 225.0503 1231.0 207.0252 1090.0 210.0068 1076.0 dtype: float64	Positive	Industrial chemical
279	N-methyldodecylamine	C13H29N	200.237	200.2399 2485.0 200.2341 1178.0 200.2457 928.0 202.0825 586.0 202.0767 548.0 201.2399 505.0 105.0777 479.0 187.1125 462.0 145.1037 333.0 143.0800 327.0 123.0814 316.0 201.2458 315.0 203.0872 308.0 202.0680 298.0 201.1413 296.0 98.9696 293.0 142.0807 289.0 157.0645 287.0 200.0604 281.0 202.0854 280.0 dtype: float64	Positive	Personal care product
280	5,6,7-Trimethoxycoumarin	C12H12O5	237.078	207.0693 47340.0 237.0815 46984.0 149.0210 31691.0 207.0311 22606.0 191.0003 21000.0 149.0235 17937.0 207.0340 14939.0 193.0477 13822.0 237.0752 13670.0 237.0783 13545.0 207.0664 10329.0 208.0688 9314.0 223.0623 9007.0 238.0814 8622.0 225.0441 8385.0 207.0517 8258.0 209.0115 7330.0 207.0399 7293.0 193.0136 7104.0 207.0723 6365.0 dtype: float64	Positive	Pharmaceutical
281	Tris(2-chloroisopropyl)phosphate (TCPP)	C9H18Cl3O4P1	327.007	98.9838 77289.0 174.9901 4257.0 174.9955 4009.0 330.1701 2540.0 330.1813 1543.0 175.0036 1424.0 176.9932 1203.0 162.1278 1131.0 330.1924 933.0 174.9846 891.0 176.9877 830.0 162.1252 802.0 80.9710 762.0 330.1739 713.0 80.9747 656.0 162.1383 593.0 150.0747 525.0 162.1304 508.0 327.1879 484.0 211.1548 473.0 dtype: float64	Positive	Industrial chemical
282	1,2-Chrysenedione	C18H10O2	259.079	202.0789 11957.0 203.0838 8170.0 259.0710 5222.0 263.0818 4071.0 231.0796 2856.0 204.0883 1138.0 262.0738 1084.0 206.0869 965.0 235.0817 888.0 219.0976 869.0 235.0880 853.0 260.0898 795.0 234.0725 746.0 260.0799 745.0 205.0747 708.0 219.0855 687.0 260.0667 647.0 206.0781 612.0 233.0717 586.0 233.0654 563.0 dtype: float64	Positive	Industrial chemical
283	Isoprothiolane	C12H18O4S2	291.072	188.9671 136360.0 242.2504 43530.0 290.2698 31525.0 231.0152 15284.0 144.9780 11332.0 190.9636 8087.0 291.2746 7535.0 231.0121 7084.0 189.9668 7079.0 243.2514 6421.0 189.9697 6183.0 172.9714 4651.0 172.9688 3737.0 190.9692 3504.0 172.9768 3357.0 118.0872 3158.0 122.0824 2367.0 172.9741 2173.0 272.2577 1944.0 146.9753 1447.0 dtype: float64	Positive	Pesticide
284	4-Methylcinnamic Acid	C10H10O2	163.075	-	Positive	Personal care product
285	7-Methoxy-4-methylcoumarin	C11H10O3	191.071	163.0382 48301.0 135.0433 13840.0 115.0541 9417.0 133.0295 9383.0 145.0655 9280.0 103.0549 9220.0 132.0565 8028.0 133.0271 7021.0 117.0691 6775.0 131.0495 5265.0 108.9047 4044.0 105.0715 3320.0 133.0908 2463.0 178.1084 1988.0 102.0457 1932.0 115.0497 1879.0 145.0680 1815.0 103.0570 1775.0 133.0861 1667.0 117.0669 1643.0 dtype: float64	Positive	Natural product
286	Reynoutrin	C20H18O11	435.09	435.1063 11839.0 436.1100 2330.0 287.0929 2046.0 247.0948 1312.0 149.0235 897.0 437.2817 872.0 161.0558 714.0 437.2560 677.0 149.0184 636.0 229.0465 620.0 437.1148 606.0 229.0620 502.0 437.2988 498.0 435.2300 496.0 435.1873 471.0 437.2346 451.0 435.2386 426.0 435.2727 420.0 189.0539 418.0 260.9751 407.0 dtype: float64	Positive	Natural product
287	Allylescaline	C13H19N1O3	238.141	-	Positive	Pharmaceutical
288	Nandrolone	C18H26O2	275.203	159.1174 3437.0 149.0263 2078.0 149.0238 1984.0 173.1356 1889.0 131.0815 1832.0 173.1302 1552.0 133.1014 1459.0 145.0963 1392.0 145.1012 1357.0 179.1090 1354.0 144.0925 1207.0 143.0873 1203.0 143.0824 1192.0 119.0875 1190.0 157.0978 1181.0 235.1634 1168.0 235.1666 1145.0 158.1098 1113.0 157.1055 1063.0 277.1748 964.0 dtype: float64	Positive	Pharmaceutical
289	4'-Methyl-alpha-pyrrolidinopropiophenone	C14H19N1O1	218.154	218.1540 46488.0 176.1422 29088.0 176.1449 21006.0 158.0970 18880.0 134.0946 12613.0 176.1069 11336.0 134.0970 10409.0 143.0726 9666.0 219.1554 5315.0 133.0919 4480.0 219.1585 4236.0 219.1645 4213.0 160.1100 4162.0 147.0671 3967.0 132.0789 3781.0 177.1429 3660.0 133.0896 3342.0 119.0741 3295.0 160.1125 3294.0 177.1484 3111.0 dtype: float64	Positive	Pharmaceutical
290	Fipronil-desulfinyl	C12H4Cl2F6N4	386.962	-	Negative	Pesticide
291	BENZO(C)ACRIDINE	C17H11N1	230.099	230.0945 152519.0 231.0952 19900.0 231.1014 18896.0 229.0868 12199.0 202.0760 11572.0 228.0813 5540.0 203.0809 2767.0 232.1042 2071.0 203.0722 1611.0 204.0824 1409.0 201.0708 1310.0 227.0748 1232.0 232.1136 1210.0 232.0980 1207.0 233.1029 1181.0 232.0886 1096.0 227.0687 1009.0 189.0708 993.0 230.2498 969.0 151.0362 800.0 dtype: float64	Positive	Industrial chemical
292	Penbutolol	C18H29NO2	292.229	293.2139 12814.0 292.2301 11065.0 294.2134 2571.0 275.1973 1677.0 121.0616 935.0 177.1266 825.0 151.1066 635.0 133.0979 568.0 151.1142 522.0 165.1274 488.0 189.0848 482.0 140.1077 455.0 295.2182 453.0 123.0806 449.0 133.1097 439.0 135.1146 418.0 133.0649 417.0 135.0837 413.0 291.1012 398.0 293.1719 342.0 dtype: float64	Positive	Pharmaceutical
293	cinnamaldehyde	C9H8O1	133.066	105.0693 1412.0 105.0672 1177.0 103.0532 842.0 103.0553 839.0 79.0531 652.0 79.0512 592.0 77.0395 575.0 103.0594 546.0 77.0413 473.0 135.0939 464.0 133.0660 377.0 103.0490 290.0 103.0573 272.0 91.0558 267.0 137.1085 265.0 91.0636 244.0 133.0612 227.0 dtype: float64	Positive	Food additive
294	BISPHENOL A (2 3-DIHYDROXYPROPYL) GLYCID	C21H26O5	359.184	359.1842 23318.0 359.1804 5150.0 360.1856 3831.0 360.1972 2698.0 360.1817 1915.0 191.1050 1893.0 361.2388 1297.0 271.1049 1060.0 360.1895 896.0 161.0947 736.0 135.0813 675.0 361.1960 647.0 191.1220 639.0 361.2272 626.0 361.2350 593.0 361.1883 590.0 362.2781 554.0 361.2233 528.0 361.2155 528.0 192.1078 514.0 dtype: float64	Positive	Industrial chemical
295	Tutin	C15H18O6	295.118	-	Positive	Natural product
296	Shogaol	C17H24O3	277.182	-	Positive	Natural product
297	Butylparaben	C11H14O3	193.086	-	Positive/ Negative	Personal care product
298	Cyprodinil	C14H15N3	226.134	-	Positive	Pesticide
299	17beta-Trenbolone	C18H22O2	271.168	271.1689 149258.0 241.1191 76589.0 272.1741 26108.0 201.0882 18185.0 242.1243 10919.0 243.1731 10661.0 256.1413 6207.0 173.0594 5459.0 226.0984 5079.0 213.1232 4845.0 253.1598 3751.0 129.0705 3137.0 185.1324 3131.0 273.1743 2367.0 173.0971 2355.0 228.1523 2220.0 272.2923 2209.0 157.1017 2149.0 142.0766 2146.0 244.1793 2078.0 dtype: float64	Positive	Pharmaceutical
300	5,7-Dimethoxycoumarin	C11H10O4	207.066	163.0382 31039.0 135.0433 15424.0 192.0907 5954.0 191.0852 5119.0 207.0605 3381.0 207.0664 3380.0 164.0431 2839.0 103.0196 2819.0 119.0101 2561.0 164.0379 2408.0 120.0213 2395.0 179.0847 2364.0 165.0669 1840.0 153.0574 1658.0 178.0784 1600.0 207.1165 1468.0 136.0463 1334.0 169.1008 1316.0 179.0929 1044.0 193.1018 1018.0 dtype: float64	Positive	Pharmaceutical
301	Norketamine	C12H14Cl1N1O1	224.087	-	Positive	Pharmaceutical
302	2-Methylindole	C9H9N1	132.081	117.0578 141528.0 117.0556 58967.0 132.0813 29034.0 132.0789 26469.0 130.0645 23007.0 105.0693 14669.0 130.0668 11284.0 131.0697 9160.0 118.0627 8669.0 90.0453 5779.0 89.0386 5778.0 131.0721 5769.0 103.0553 5756.0 115.0542 5593.0 118.0605 5396.0 118.0583 4572.0 133.0849 2927.0 116.0505 2817.0 90.0492 2622.0 119.0719 2420.0 dtype: float64	Positive	Natural product
303	Nalmefene	C21H25NO3	340.197	-	Positive	Pharmaceutical
304	Rhein	C15H8O6	285.047	-	Positive	Natural product
305	Mandestrobin	C19H23NO3	314.171	-	Positive	Pesticide
306	Endosulfan sulfate	C9H6Cl6O4S1	418.802	-	Negative	Pesticide
307	Formetanate	C11H15N3O2	222.122	-	Positive	Pesticide
308	Acrylic acid	C3H4O2	331.19	-	Positive	Industrial chemical
309	Zamifenacin	C27H29N1O3	416.219	-	Positive	Pharmaceutical
310	Dihydrocapsaicin	C18H29N1O3	308.223	-	Positive	Pharmaceutical
311	Brompheniramine	C16H19Br1N2	319.082	-	Positive	Pharmaceutical
312	N,N-Bis(2Negativeydroxyethyl)dodecanamide	C16H33N1O3	288.255	-	Positive	Personal care product
313	2-(4-Nonylphenoxy)Acetic Acid	C17H26O3	277.181	-	Negative	Industrial chemical
314	Benz[de]anthracen-7-one	C17H10O1	231.084	231.0796 62894.0 202.0760 53015.0 203.0838 14697.0 232.0855 9404.0 191.0852 2802.0 202.2099 2043.0 201.0708 1885.0 204.0853 1846.0 202.2215 1807.0 233.0936 1498.0 204.0941 1257.0 191.0739 1184.0 230.0697 1049.0 230.0914 923.0 200.0622 830.0 218.1113 805.0 189.0764 754.0 212.1981 736.0 218.1052 714.0 192.0907 711.0 dtype: float64	Positive	Industrial chemical
315	N-(2Negativeydroxyethyl)icosanamide	C22H45N1O2	356.351	356.3470 61966.0 356.3547 52410.0 357.3521 12021.0 357.3560 9332.0 338.3355 3873.0 338.3468 3303.0 338.3392 3212.0 357.2090 1615.0 358.3548 1587.0 358.3625 1354.0 358.3702 976.0 339.3375 953.0 358.3586 952.0 339.3526 941.0 359.2230 919.0 106.0871 857.0 357.2051 824.0 359.2463 824.0 359.1959 803.0 359.2191 797.0 dtype: float64	Positive	Industrial chemical
316	Novaluron	C17H9Cl1F8N2O4	491.002	-	Negative	Pesticide
317	Triclocarban	C13H9Cl3N2O1	312.97	-	Negative	Personal care product
318	Monomethyl phthalate	C9H8O4	181.05	-	Positive	Industrial chemical
319	Vortioxetine	C18H22N2S	299.156	-	Positive	Natural product
320	Norfloxacin	C16H18F1N3O3	320.139	-	Positive	Pharmaceutical
321	3-Methylcatechol	C7H8O2	125.059	-	Positive	Natural product
322	Benzoximate	C18H18ClNO5	364.087	-	Positive	Pesticide
323	11-Keto-testosterone	C19H26O3	303.193	303.1931 8399.0 244.1697 4002.0 229.1487 1812.0 304.1917 1555.0 305.1526 794.0 302.3101 746.0 305.2169 737.0 302.2994 548.0 302.1820 525.0 302.1749 510.0 306.1973 493.0 305.1668 488.0 302.2888 471.0 306.2152 458.0 303.2252 444.0 302.1642 433.0 305.1740 362.0 304.1667 357.0 647.3641 347.0 271.1083 340.0 dtype: float64	Positive	Natural product
324	Genistein	C15H10O5	269.046	-	Negative	Natural product
325	Retinoate	C20H28O2	301.216	301.2155 82151.0 302.2177 14566.0 259.1717 8785.0 259.1651 6566.0 163.0749 6523.0 213.1216 5546.0 171.0823 5291.0 213.1306 5178.0 205.1216 4458.0 213.1276 4317.0 171.0796 3840.0 205.1275 3270.0 205.1187 3089.0 303.2252 2263.0 199.1065 2254.0 185.0974 2126.0 123.1177 2062.0 260.1674 1936.0 199.1094 1845.0 303.2323 1703.0 dtype: float64	Positive	Pharmaceutical
326	Paeonol	C9H10O3	165.042	-	Negative	Pharmaceutical
327	2-(Thiocyanatomethylthio)benzothiazole	C9H6N2S3	238.975	-	Positive	Industrial chemical
328	Dimethyl isophthalate	C10H10O4	195.051	-	Positive	Industrial chemical
329	Quizalofop-ethyl	C19H17ClN2O4	373.101	-	Positive	Pesticide
330	Glucoerucin	C12H23NO9S3	420.052	-	Negative	Food additive
331	3,4-Dichlorophenylurea	C7H6Cl2N2O1	202.978	-	Negative	Pesticide
332	senegalensin	C27H30O10	407.184	-	Negative	Pharmaceutical
333	Dinoterb	C10H12N2O5	239.066	-	Negative	Pesticide
334	Buprofezin	C16H23N3OS	306.164	201.1065 6912.0 201.1036 5653.0 208.0535 3021.0 208.0565 2809.0 250.0958 1040.0 208.0624 1024.0 250.1184 895.0 202.1087 768.0 306.1644 752.0 202.1058 722.0 208.0653 686.0 250.1022 642.0 290.1165 601.0 290.1130 589.0 718.1730 580.0 918.6021 570.0 208.0447 570.0 250.1055 562.0 250.1119 558.0 231.1334 543.0 dtype: float64	Positive	Pesticide
335	Gamolenic acid	C18H30O2	279.233	149.0238 18133.0 95.0881 1962.0 95.0841 1640.0 150.0271 1476.0 109.1004 1430.0 150.0346 1288.0 162.1304 1229.0 123.1177 1102.0 121.0289 961.0 281.1985 947.0 281.2054 813.0 135.1153 808.0 107.0838 806.0 279.2019 745.0 81.0723 736.0 121.0334 725.0 131.0908 714.0 133.1037 696.0 131.0862 645.0 149.1337 613.0 dtype: float64	Positive	Natural product
336	Pregnenolone acetate	C23H34O3	359.254	-	Positive	Pharmaceutical
337	Coriolic acid	C18H32O3	295.224	-	Negative	Industrial chemical
338	Salmeterol	C25H37N1O4	416.281	416.2764 380034.0 417.2832 87495.0 398.2713 18391.0 259.1336 12547.0 342.2085 9864.0 398.2632 8856.0 418.2871 8191.0 286.1402 7377.0 416.4852 6836.0 119.0860 6075.0 259.1303 6035.0 114.0903 4490.0 399.2725 4397.0 203.0692 4143.0 380.2572 4033.0 418.2787 4018.0 315.1968 3769.0 191.0739 3680.0 286.1436 2927.0 199.1111 2747.0 dtype: float64	Positive	Pharmaceutical
339	OPEO-8	C30H54O9	559.389	-	Positive	Industrial chemical
340	Triphenyl phosphate (TPHP)	C18H15O4P1	327.081	-	Positive	Industrial chemical
341	Zopiclone	C17H17Cl1N6O3	389.109	-	Positive	Pharmaceutical
342	OPEO-6	C26H46O7	471.335	-	Positive	Industrial chemical
343	L-Aspartyl-L-Phenylalanine	C13H16N2O5	281.113	-	Positive	Food additive
344	N-(2Negativeydroxypropyl)dodecanamide	C15H31N1O2	258.244	230.2478 21964.0 240.2357 7904.0 240.2293 7567.0 240.2325 7289.0 258.2404 5335.0 258.2469 5247.0 231.2548 4047.0 212.2384 3308.0 231.2516 2282.0 212.2325 1951.0 231.2610 1556.0 241.2293 1520.0 241.2356 1520.0 212.2414 1340.0 259.2408 1254.0 259.2441 1060.0 213.2411 1038.0 259.2540 958.0 258.2601 732.0 213.2471 726.0 dtype: float64	Positive	Industrial chemical
345	4-(2,5-Diethoxy-4-nitrophenyl)morpholine	C14H20N2O5	297.142	-	Positive	Natural product
346	Estrone	C18H22O2	271.168	271.1689 1207169.0 241.1223 879951.0 272.1707 277889.0 201.0911 149357.0 242.1243 120084.0 272.1741 89549.0 226.0984 63893.0 256.1446 63851.0 271.3307 45872.0 173.0594 34268.0 273.1743 22345.0 253.1565 22095.0 241.2780 20945.0 271.4690 17978.0 202.0935 14396.0 271.3341 14185.0 201.0940 13776.0 271.4218 13089.0 213.1262 11732.0 255.1368 11488.0 dtype: float64	Positive	Pharmaceutical
347	Malaoxon	C10H19O7P1S1	315.071	-	Positive	Pesticide
348	Oleic acid	C18H34O2	283.264	251.0415 1570.0 251.0512 1552.0 95.0861 1114.0 285.2305 942.0 254.2480 899.0 225.2182 850.0 109.1025 745.0 225.2243 680.0 225.2121 640.0 283.1197 623.0 254.2447 598.0 283.2161 586.0 285.2201 568.0 284.3224 547.0 286.1642 495.0 109.0982 490.0 109.1046 483.0 284.3362 480.0 283.2126 471.0 285.2374 463.0 dtype: float64	Positive	Personal care product
349	Akuammicine	C20H22N2O2	323.177	-	Positive	Natural product
350	Diosgenin	C27H42O3	415.322	-	Positive	Pharmaceutical
351	Diphenyl phosphate	C12H11O4P1	251.035	251.0478 7463.0 152.0641 5098.0 153.0701 3588.0 175.0167 1634.0 233.0373 1546.0 175.0221 1384.0 215.0275 1267.0 191.0032 1237.0 193.0222 1183.0 209.0145 1084.0 209.0086 1012.0 252.0475 1008.0 207.0311 982.0 193.0108 883.0 253.1142 842.0 95.0483 785.0 252.1027 778.0 253.1240 736.0 237.1161 726.0 77.0398 679.0 dtype: float64	Positive	Industrial chemical
352	Cashmeran	C14H22O1	207.175	-	Positive	Personal care product
353	1-Naphthylamine	C10H9N1	144.083	-	Positive	Industrial chemical
354	N,N-Dimethyl-N'-p-tolylsulphamide	C9H14N2O2S1	215.085	-	Positive	Pesticide
355	8Negativeydroxyquinoline-5-sulfonic acid	C9H7N1O4S1	226.017	-	Positive	Industrial chemical
356	Isazofos	C9H17Cl1N3O3P1S1	314.048	-	Positive	Pesticide
357	Aflatoxin G1	C17H12O7	329.074	-	Positive	Natural product
358	Acetazolamide	C4H6N4O3S2	222.994	-	Positive	Pharmaceutical
359	Fraxidin	C11H10O5	223.062	-	Positive	Pesticide
360	Tricosanoic acid	C23H46O2	355.359	-	Positive	Industrial chemical
361	Benzofenap	C22H20Cl2N2O3	431.092	-	Positive	Pesticide
362	Flubromazolam	C17H12Br1F1N4	371.029	-	Positive	Pharmaceutical
363	Hinokiflavone	C30H18O10	539.097	-	Positive	Pharmaceutical
364	Tonalide	C18H26O1	259.208	175.1471 3095.0 119.0853 2591.0 161.1316 2385.0 133.1014 2180.0 145.1012 1966.0 259.2046 1722.0 159.1148 1616.0 147.1143 1222.0 201.1616 1075.0 201.1674 913.0 176.1531 840.0 157.1004 808.0 105.0714 808.0 131.0862 799.0 143.0848 764.0 171.1144 763.0 123.1154 733.0 107.0859 731.0 157.1055 716.0 259.1091 714.0 dtype: float64	Positive	Personal care product
365	Suxibuzone	C24H26N2O6	439.18	-	Positive	Pharmaceutical
366	Mocetinostat	C23H20N6O	397.186	-	Positive	Pharmaceutical
367	Tetraethylene glycol monododecyl ether	C20H42O5	363.31	-	Positive	Industrial chemical
368	Monomyristin	C17H34O4	303.25	-	Positive	Pesticide
369	GLYCOPYRRONIUM	C19H28N1O3	319.214	-	Positive	Pharmaceutical
370	20Negativeydroxyecdysone	C27H44O7	481.311	-	Positive	Natural product
371	1-Palmitoylcephalin	C21H44NO7P	452.275	-	Positive/ Negative	Pharmaceutical
372	Thiophanate	C14H18N4O4S2	371.1	-	Positive	Pesticide
373	Fraxin	C16H18O10	371.1	-	Positive	Pharmaceutical
374	Cefditoren	C19H18N6O5S3	507.057	-	Positive	Pharmaceutical
375	Ellagic acid	C14H6O8	303.011	-	Positive	Pharmaceutical
376	Isoxaflutole	C15H12F3N1O4S1	360.069	-	Positive	Pesticide
377	Pyrazophos	C14H20N3O5P1S1	374.098	-	Positive	Pesticide
378	Sphingosine	C18H37N1O2	300.289	283.2643 1256.0 282.2769 1152.0 282.2872 978.0 258.2700 969.0 283.2746 966.0 258.2634 877.0 268.9761 778.0 258.2831 754.0 301.0877 745.0 300.2859 683.0 299.1454 675.0 95.0841 622.0 268.9862 613.0 301.2262 591.0 256.1273 589.0 284.2672 536.0 302.1893 511.0 299.1985 507.0 300.0909 482.0 301.2155 475.0 dtype: float64	Positive	Natural product
379	Haloxyfop	C15H11ClF3NO4	360.024	-	Negative	Pesticide
380	Dehydrocorydaline	C22H24NO4+	367.181	-	Positive	Pharmaceutical
381	Acetildenafil	C25H34N6O3	467.28	-	Positive	Pharmaceutical
382	1-Octylpyrrolidin-2-One	C12H23N1O1	198.187	-	Positive	Personal care product
383	N-Ethyl-4-menthane-3-carboxamide	C13H25N1O1	212.203	-	Positive	Food additive
384	13aNegativeydroxylupanin	C15H24N2O2	265.191	-	Positive	Natural product
385	Vildagliptin	C17H25N3O2	304.199	-	Positive	Pharmaceutical
386	Cycloheximide	C15H23N1O4	282.17	-	Positive	Pharmaceutical
387	Dydrogesterone	C21H28O2	313.218	-	Positive	Pharmaceutical
388	Sclareol	C20H36O2	309.28	-	Positive	Natural product
389	Florfenicol	C12H14Cl2F1N1O4S1	358.01	-	Positive	Pesticide
390	Tritosulfuron	C13H9F6N5O4S1	446.037	-	Positive	Pesticide
391	Linoleic acid	C18H32O2	279.234	-	Positive/ Negative	Natural product
392	2,4,12-Octadecatrienamide	C22H39NO	334.313	317.2857 19601.0 317.2784 16810.0 109.1012 9254.0 95.0862 7731.0 334.3086 6582.0 123.1147 6250.0 318.2889 4626.0 135.1194 4375.0 121.0998 4078.0 149.1309 3617.0 137.1321 3024.0 123.1169 2629.0 81.0715 2608.0 107.0843 2456.0 334.3123 2389.0 109.0991 2348.0 133.1026 2315.0 147.1160 1758.0 131.0870 1648.0 335.3159 1618.0 dtype: float64	Positive	Natural product
393	HYOCHOLIC ACID	C24H40O5	409.293	-	Positive	Natural product
394	L-Thyroxine	C15H11I4NO4	777.691	-	Positive	Pharmaceutical
395	3-Methylsalicylic acid	C8H8O3	153.054	-	Positive	Natural product
396	Pantethine	C22H42N4O8S2	555.254	-	Positive	Pharmaceutical
397	Oleoyl-glycerol	C21H40O4	357.31	-	Positive	Personal care product
398	Gossypol	C30H30O8	519.204	-	Positive	Natural product
399	Diisononyl phthalate	C26H42O4	419.317	149.0238 73646.0 150.0271 5380.0 150.0296 4644.0 149.0213 4110.0 85.1022 2812.0 85.1003 2522.0 121.0312 1156.0 924.2662 1107.0 121.0267 1069.0 421.3476 974.0 421.3350 939.0 925.2804 870.0 71.0841 856.0 127.1549 745.0 127.1456 744.0 127.1480 716.0 167.0308 708.0 421.3517 676.0 419.3634 646.0 421.3181 645.0 dtype: float64	Positive	Industrial chemical
400	UV Absorber 234	C30H29N3O1	448.239	370.1865 77075.0 370.1904 71268.0 448.2344 19727.0 371.1949 15885.0 371.1910 15432.0 448.2388 14737.0 119.0853 7193.0 292.1413 5480.0 449.2356 5295.0 449.2399 4791.0 292.1447 3633.0 449.2530 2770.0 252.1091 2424.0 252.1189 2376.0 372.1968 1888.0 372.2008 1743.0 372.1929 1571.0 293.1493 1405.0 252.1059 1334.0 372.2126 1265.0 dtype: float64	Positive	Industrial chemical
401	Astaxanthin	C40H52O2	565.4	237.0781 28344.0 203.1426 14448.0 133.0636 12590.0 237.0844 4604.0 238.0809 4212.0 565.3904 3760.0 238.0746 3015.0 567.4600 2804.0 565.4099 2702.0 565.3953 2614.0 567.4551 2385.0 565.4050 2367.0 215.1425 2202.0 567.4453 2148.0 204.1470 2061.0 567.4404 2041.0 238.0778 2031.0 565.4245 1982.0 567.4648 1972.0 532.2403 1934.0 dtype: float64	Positive	Natural product
402	Dipentyl phthalate	C18H26O4	307.189	-	Positive	Industrial chemical
403	Auraptene	C19H22O3	297.152	-	Negative	Natural product
404	Andrastin A	C28H38O7	485.256	-	Negative	Natural product
405	Acrylamide	C3H5NO	72.0444	55.0187	Positive	Industrial chemical
406	Acetamiprid	C10H11ClN4	223.075	126.011	Positive	Pesticide
407	2-Aminopyridine	C5H6N2	95.0604	78.0346	Positive	Pharmaceutical
408	2-Ethylhexanoicacid	C8H16O2	143.108	71.0499	Negative	Industrial chemical
409	2-(2-Ethoxyethoxy)ethanol	C6H14O3	135.102	73.0656	Positive	Personal care product
410	Orysastrobin	C18H25N5O5	392.193	116.05	Positive	Pesticide
411	Carbofuran	C12H15NO3	222.113	123.044	Positive	Pesticide
412	Quinofop-ethyl	C19H17ClN2O4	373.095	299.058	Positive	Pesticide
413	2-Chloroaniline	C6H6ClN	128.026	93.0578	Positive	Industrial chemical
414	3-Chloroaniline	C6H6ClN	128.026	93.0578	Positive	Industrial chemical
415	4-Chloroaniline	C6H6ClN	128.026	93.0578	Positive	Industrial chemical
416	Cyanazine	C9H13ClN6	241.096	104.001	Positive	Pesticide
417	Disulfoton	C8H19O2PS3	275.036	-	Positive	Pesticide
418	2,4-Dinitrophenol	C6H4N2O5	183.005	95.0126	Negative	Industrial chemical
419	Dinotefuran	C7H14N4O3	201.099	61.0029	Negative	Pesticide
420	Diphenylamine	C12H11N	170.096	93.0578	Positive	Industrial chemical
421	N,N-Dimethylacetamide	C4H9NO	88.0757	70.0659	Positive	Industrial chemical
422	N,N-Dimethyldodecylamine	C14H31N	214.253	71.0863	Positive	Industrial chemical
423	Simetryn	C8H15N5S	214.112	96.0561	Positive	Pesticide
424	Dymron	C17H20N2O	267.15	98.9846	Negative	Pesticide
425	Thiacloprid	C10H9ClN4S	253.031	126.015	Positive	Pesticide
426	Tiadinil	C11H10ClN3OS	266.016	70.9947	Negative	Pesticide
427	Thiocyclam	C5H11NS3	182.126	97.0082	Positive	Pesticide
428	Thiophanate-methyl	C12H14N4O4S2	343.053	151.032	Positive	Pesticide
429	2,4-Dichlorophenoxyaceticacid	C8H6Cl2O3	218.962	160.956	Negative	Pesticide
430	Decanoicacid	C10H20O2	171.139	-	Negative	Industrial chemical
431	Tetrahydromethylphthalicanhydride	C9H10O3	165.056	93.0333	Negative	Industrial chemical
432	Tefuryltrione	C20H23ClO7S	441.078	405.101	Negative	Pesticide
433	TerephthalicAcid	C8H6O4	165.019	108.936	Negative	Industrial chemical
434	Triethanolamine	C6H15NO3	150.113	70.0659	Positive	Industrial chemical
435	TriethyleneGlycolDimethylEther	C8H18O4	179.128	59.05	Positive	Industrial chemical
436	TriglycidylIsocyanurate	C12H15N3O6	298.103	130.015	Positive	Industrial chemical
437	Triclosanandchlorineadducts	C12H7Cl3O	286.944	200.949	Negative	Personal care product
438	Tricyclazol	C9H7N3S	190.043	126.022	Positive	Pesticide
439	Hexamethylenediacrylate	C12H18O4	227.128	73.0291	Positive	Industrial chemical
440	Nitenpyram	C11H15ClN4O2	271.096	56.0504	Positive	Pesticide
441	N-Nitrosodimethylamine	C2H6N2O	75.0553	62.45	Positive	Industrial chemical
442	N-Nitrosodiethylamine	C4H10N2O	103.087	53.9983	Positive	Industrial chemical
443	N-Nitrosodipropylamine	C6H14N2O	131.118	65.0394	Positive	Industrial chemical
444	N-Nitrosodibutylamine	C8H18N2O	159.149	57.0708	Positive	Industrial chemical
445	N-Nitrosodiphenylamine	C12H10N2O	199.087	-	Positive	Industrial chemical
446	N-Nitrosopyrrolidine	C4H8N2O	101.071	55.0551	Positive	Industrial chemical
447	Pyraclonil	C15H15ClN6	315.112	169.053	Positive	Pesticide
448	Pyrazolynate	C19H16Cl2N2O4S	439.028	172.956	Positive	Pesticide
449	Pyridine	C5H5N	80.0495	53.0395	Positive	Natural product
450	Ferimzone	C15H18N4	255.16	132.181	Positive	Pesticide
451	Butachlor/Pretilachlor*	C17H26ClNO2	312.173	162.128	Positive	Pesticide
452	DimethylPhthalate	C10H10O4	195.065	163.039	Positive	Personal care product
453	DiallylPhthalate	C14H14O4	247.096	53.0031	Positive	Industrial chemical
454	DibutylPhthalate/DiisobutylPhthalate*	C16H22O4	279.16	149.023	Positive	Industrial chemical
455	BenzylButylPhthalate	C19H20O4	313.144	176.143	Positive	Industrial chemical
456	DicyclohexylPhthalate	C20H26O4	331.19	149.023	Positive	Industrial chemical
457	2-ButanoneOxime	C4H9NO	88.0757	73.0528	Positive	Industrial chemical
458	Flutolanil	C17H16F3NO2	324.121	242.061	Positive	Pesticide
459	Bromobutide	C15H22BrNO	312.096	-	Positive	Pesticide
460	Hexabromocyclododecane	C12H18Br6	634.644	-	Negative	Industrial chemical
461	PentadecafluorooctanoicAcid	C8HF15O	412.966	168.989	Negative	Industrial chemical
462	Benzobicyclon	C22H19ClO4S2	447.049	257.063	Positive	Pesticide
463	Bentazon	C10H12N2O3S	239.05	132.032	Negative	Pesticide
464	Malathion	C10H19O6PS2	331.043	-	Positive	Pesticide
465	GlycidylMethacrylate	C7H10O3	143.07	57.0344	Positive	Industrial chemical
466	N-Methyldidecylamine	C21H45N	312.362	172.206	Positive	Pharmaceutical
467	1-Methyl-2-pyrrolidone	C5H9NO	100.076	58.0296	Positive	Industrial chemical
468	Metominostrobin	C16H16N2O3	284.123	194.06	Positive	Pesticide
469	Melamine	C3H6N6	127.073	68.0251	Positive	Industrial chemical
470	Ethanolamine	C2H7NO	62.06	60.9822	Positive	Personal care product
471	Molinate	C9H17NOS	188.11	55.0551	Positive	Pesticide
472	Tris(2-ethylhexyl)Phosphate	C24H51O4P	435.36	98.9846	Positive	Industrial chemical
473	Tris(2-chloroethyl)Phosphate	C6H12Cl3O4P	284.961	63.0004	Positive	Industrial chemical
474	TricresylPhosphate	C21H21O4P	369.125	166.078	Positive	Industrial chemical
475	TriphenylPhosphate	C18H15O4P	327.078	233.036	Positive	Industrial chemical
476	TributylPhosphate	C12H27O4P	267.172	98.9846	Positive	Industrial chemical
477	Dinotefuran-13C5	C7H14N4O3	208.1301/ 206.1156	-	Positive/ Negative	Pesticide
478	Diuron-D6	C9H10Cl2N2O	239.0620/ 2370.474	-	Positive/ Negative	Industrial chemical
479	Iohexol	C19H26I3N3O9	820.88	-	Negative	Industrial chemical
480	DL-Arginine	C6H14N4O2	174.112	-	Positive	Industrial chemical
481	Oleamide	C18H35NO	281.272	265.253	Positive	Industrial chemical
482	Ricinoleic acid	C18H34O3	298.251	279.233	Negative	Industrial chemical
483	Steraic acid	C18H36O2	284.272	265.254	Negative	Personal care product
484	2,4,6-TBP	C6H3Br3O	327.773	247.206	Negative	Pesticide
485	4-Bromophenol (4-BP)	C6H5BrO	171.952	142.96	Negative	Industrial chemical
486	Cresyl diphenyl phosphate (CDP)	C19H17O4P	340.086	261.067	Positive	Industrial chemical
487	Dimethyl phosphate (DMP)	C2H7O4P	126.008	94.9669	Positive	Pesticide
488	2-Ethylhexyl diphenyl phosphate (EHDPP)	C22H31O4P	362.165	251.083	Positive	Industrial chemical
489	Tris(p-tert-butylphenyl) phosphate (TBPP)	C33H45O4P	494.259	261.067	Positive	Industrial chemical
490	Tris(2-chloro-2-propanyl) phosphate (TCIPP)	C9H15Cl6O4P	326.001	98.9842	Positive	Industrial chemical
491	Trimethyl phosphate (TMP)	C3H9O4P	140.024	110.985	Positive	Pesticide
492	Tri-n-butyl phosphate (TNBP)	C12H27O4P	266.165	155.026	Positive	Industrial chemical
493	Tris(2-butoxyethyl) phosphate (TBEP)	C18H39O7P	398.243	-	Positive	Industrial chemical
494	αNegativeBCD	C12H18Br6	641.645	-	Negative	Industrial chemical
495	Nicotinamide	C6H6N2O	122.048	-	Positive	Pharmaceutical
496	2-methylbenzothiazole (MTBT)	C8H7NS	149.03	-	Positive	Food additive
497	Acesulfame	C4H4NO4S	162.994	-	Negative	Food additive
498	Saccharin	C7H5NO3S	182.999	-	Negative	Food additive
499	Sorbitol	C6H14O6	182.079	-	Negative	Pharmaceutical
500	Sucralose	C12H19Cl3O8	396.015	359.0306​, 231.9874	Negative	Food additive
501	Dienogest	C20H25NO2	311.189	268.1399, 225.1277	Positive	Pharmaceutical
502	Estriol (4 isomers)	C18H24O3	288.173	271.1702, 253.1596	Negative	Pharmaceutical
503	Etonogestrel	C22H28O2	324.209	241.1702, 183.1389	Positive	Pharmaceutical
504	Gestodene	C21H26O2	310.193	309.2161, 251.1848	Positive	Pharmaceutical
505	Levonorgestrel	C21H28O2	312.209	241.1702, 223.1596	Positive	Pharmaceutical
506	Norethindrone	C20H26O2	298.193	-	Positive	Pharmaceutical
507	Testosterone	C19H28O2	288.209	-	Positive	Pharmaceutical
508	Bisphenol AF	C15H10F6O2	336.058	-	Negative	Industrial chemical
509	2,2-Dimorpholinyldiethylether	C12H24N2O3	244.179	-	Positive	Industrial chemical
510	4-(Trifluoromethyl)benzenesulfonamide	C7H6F3NO2S	225.007	-	Negative	Industrial chemical
511	4-Amino-6-(trifluoromethyl)benzene-1,3-disulfonamide	C7H8F3N3O4S2	318.991	-	Negative	Pharmaceutical
512	4-Chloro-2-isopropyl-5-methylphenol	C10H13ClO	184.065	-	Negative	Pharmaceutical
513	4-Chloro-3-methylphenol	C7H7ClO	142.019	-	Negative	Industrial chemical
514	4-Chloro-4'-fluorobutyrophenone	C10H10ClFO	200.04	-	Positive	Pharmaceutical
515	5-Amino-2-chlorotoluene-4-sulfonic acid	C7H8ClNO3S	220.991	-	Negative	Industrial chemical
516	Benzoic acid	C7H6O2	122.037	77.0391​	Negative	Food additive
517	Butyl dihydrogen phosphate (mono-n-butylphosphoric acid)	C4H11O4P	154.04	79.9663	Positive	Industrial chemical
518	Dibutyl phosphate	C8H19O4P	210.102	96.9694	Positive	Industrial chemical
519	Dipentyl hydrogen phosphate	C10H23O4P	238.133	96.9694	Positive	Industrial chemical
520	Mono-n-butylphosphoric acid	C4H11O4P	154.04	79.9663	Positive	Industrial chemical
521	N-Butyldiethanolamine	C8H19NO2	161.142	104.107	Positive	Industrial chemical
522	Daidzein	C15H10O4	254.058	255.065	Positive	Pharmaceutical
523	3-(4-Methylbenzylidene)camphor	C18H22O	254.167	-	Positive	Personal care product
524	Octocrylene	C18H22O	361.204	-	Positive	Personal care product
525	Oxybenzone	C24H27NO2	228.079	151.04	Positive	Personal care product
526	Propylparaben	C10H12O3	180.079	137.06	Negative	Personal care product
527	2,4-Dichlorophenoxyacetic acid (2,4-D)	C8H6Cl2O3	219.969	175.982	Negative	Pesticide
528	2,6-Dichlorbenzamid (BAM)	C7H5Cl2NO	188.975	172.945	Positive	Pesticide
529	4,5-Dichloro-2-octyl-isothiazolone	C11H17Cl2NOS	281.041	197.986	Positive	Pesticide
530	Alachlor	C14H20ClNO2	269.118	238.087	Positive	Pesticide
531	Amidosulfuron	C9H15N5O7S2	369.041	213.008	Positive	Pesticide
532	Atrazine-desethyl	C6H10ClN5	187.062	146.072	Positive	Pesticide
533	Atrazine-desisopropyl	C5H8ClN5	173.047	132.056	Positive	Pesticide
534	Bifenox-acid	C13H7Cl2NO5	326.97	296.976	Negative	Pesticide
535	Bitertanol	C20H23N3O2	337.179	159.092	Positive	Pesticide
536	Carbamothioic acid (Triallat)	C10H16Cl3NOS	303.002	-	Positive	Pesticide
537	Carfentrazone-ethyl	C15H14Cl2F3N3O3	411.036	-	Positive	Pesticide
538	Chlorfenvinphos	C12H14Cl3O4P	357.97	-	Positive	Pesticide
539	Chloridazon (Pyrazon)	C10H8ClN3O	221.036	173.014	Positive	Pesticide
540	Chlorpyrifos (Dursban)	C9H11Cl3NO3PS	348.926	197.002	Positive	Pesticide
541	Clomazone	C12H14ClNO2	239.071	125.016	Positive	Pesticide
542	Cyazofamid	C13H13ClN4O2S	324.045	261.004	Positive	Pesticide
543	Cybutryne	C12H18N4	253.136	156.102	Positive	Industrial chemical
544	Cyflufenamid	C20H17F5N2O2	412.121	295.021	Positive	Pesticide
545	N, N-diethyl-m-toluamide (DEET)	C12H17NO	191.131	119.085	Positive	Pesticide
546	Dichlorprop	C9H8Cl2O3	233.985	160.967	Negative	Pesticide
547	Difenoconazole I	C19H17Cl2N3O3	405.065	251.052	Positive	Pesticide
548	Diflufenican	C19H11F5N2O2	394.074	266.007	Negative	Pesticide
549	Dimethoate	C5H12NO3PS2	229	198.986	Positive	Pesticide
550	Dimethomorph	C21H22ClNO4	387.124	301.039	Positive	Pesticide
551	Epoxiconazole	C17H13ClFN3O	658.146	159.092	Positive	Pesticide
552	Fenpiclonil	C12H6Cl2N2	235.991	181.986	Negative	Pesticide
553	Fenpropidin	C19H31N	273.246	147.118	Positive	Pesticide
554	Fenpropimorph	C20H33NO	303.256	147.118	Positive	Pesticide
555	Fluazinam	C13H4Cl2F6N4O4	463.951	381.931	Negative	Pesticide
556	Fludioxonil	C12H6F2N2O2	248.04	181.986	Negative	Pesticide
557	Flufenacet	C14H13F4N3O2S	363.066	194.997	Positive	Pesticide
558	Flurtamone	C14H11F3NO4	333.098	301.055	Positive	Pesticide
559	Flutriafol	C16H13F2N3O	301.103	159.092	Positive	Pesticide
560	Foramsulfuron	C17H20N4O7S	452.111	182.985	Positive	Pesticide
561	Fuberidazole	C11H7N3O	184.064	145.028	Positive	Pesticide
562	Hexythiazox	C17H21ClN2O2S	352.101	168.998	Positive	Pesticide
563	Isoproturon	C12H18N2O	206.142	165.091	Positive	Pesticide
564	Linuron	C9H10Cl2N2O2	248.012	182.964	Positive	Pesticide
565	Mandipropamid	C23H22ClNO4	411.124	231.056	Positive	Pesticide
566	(4-Chloro-2-methylphenoxy)acetic acid (MCPA)	C9H9ClO3	200.024	141.012	Negative	Pesticide
567	Mecoprop	C10H11ClO3	214.04	141.012	Negative	Pesticide
568	Mesosulfuron-methyl	C17H21N5O9S2	503.078	182.985	Negative	Pesticide
569	Metazachlor	C14H16ClN3O	277.098	176.026	Positive	Pesticide
570	Methabenzthiazuron	C10H11N3OS	221.062	165.002	Positive	Pesticide
571	Metrafenone	C18H14O3	408.057	-	Positive	Pesticide
572	Metribuzin	C8H14N4OS	214.089	-	Positive	Pesticide
573	Metsulfuron methyl	C14H15N5O6S	381.074	-	Positive	Pesticide
574	Oxadiazon	C15H18Cl2N2O3	344.069	-	Positive	Pesticide
575	Picloram	C6H3Cl3N2O2	239.926	196.941	Negative	Pesticide
576	Picolinafen	C18H14ClF3N2O2	376.083	203.966	Positive	Pesticide
577	Pirimicarb	C11H18N4O2	238.143	182.109	Positive	Pesticide
578	Propamocarb	C9H20N2O2	188.152	144.102	Positive	Pesticide
579	Propiconazole I	C15H17Cl2N3O2	341.07	159.092	Positive	Pesticide
580	Propoxycarbazone	C15H18N4O7S	398.09	226.017	Positive	Pesticide
581	Propyzamide	C12H11Cl2NO	255.022	173.988	Positive	Pesticide
582	Prosulfocarb	C14H21NOS	251.134	128.052	Positive	Pesticide
583	Prothioconazole-desthio	C14H15Cl2N3OS	311.059	125.965	Positive	Pesticide
584	Pyroxsulam	C14H13F3N6O5S	434.062	181.008	Positive	Pesticide
585	Quinmerac	C11H8ClNO2	221.024	171.96	Positive	Pesticide
586	Quinoxyfen	C15H8Cl2FNO	306.997	-	Positive	Pesticide
587	Rimsulfuron	C14H17N5O7S2	431.057	-	Positive	Pesticide
588	Silthiofam	C12H12F6N2OS2	267.111	-	Positive	Pesticide
589	Simazine	C7H12ClN5	201.078	-	Positive	Pesticide
590	Spiroxamine I	C18H34NO2	297.267	-	Positive	Pesticide
591	Sulfosulfuron	C15H16N4O7S	470.068	-	Positive	Pesticide
592	Terbuthylazine	C9H16ClN5	229.109	-	Positive	Pesticide
593	Terbutryn	C10H19N5S	241.136	-	Positive	Pesticide
594	Thifensulfuron methyl	C12H13N5O6S2	387.031	-	Positive	Pesticide
595	Triadimefon	C14H16ClN3O2	293.093	225.01	Positive	Pesticide
596	Trifloxystrobin	C20H19F3N2O4	408.13	186.034	Positive	Pesticide
597	Triflusulfuron-methyl	C17H18F3N5O6S	492.104	413.986	Positive	Pesticide
598	Trinexapac-ethyl	C13H12O5	252.1	207.045	Positive	Pesticide
599	Triticonazole	C17H20ClN3O	317.129	251.02	Positive	Pesticide
600	N-Ethyl perfluorooctane sulfonamide (N-EtFOSA)	C10H6F17NO2S	526.985	78.9574	Negative	Pesticide
601	N-Methyl perfluorooctane sulfonamide (N-MeFOSA)	C9H4F17NO2S	512.969	78.9574	Negative	Industrial chemical
602	Perfluoro-2-propoxypropanoic acid (GenX)	C6HF11O3	329.975	168.988	Negative	Industrial chemical
603	Perfluoro-2-propoxypropanoic acid (HFPO-DA)	C6HF11O3	329.975	79.9574	Negative	Industrial chemical
604	Perfluorobutane sulfonic acid (PFBS)	C4HF9O3S	299.95	168.988	Negative	Industrial chemical
605	Perfluorobutanoic acid (PFBA)	C4HF7O2	213.986	468.977	Negative	Industrial chemical
606	Perfluorodecanoic acid (PFDA)	C10HF19O2	513.967	78.9574	Negative	Industrial chemical
607	Perfluorododecanoic acid (PFDoDA)	C12HF23O2	613.961	568.974	Negative	Industrial chemical
608	Perfluoroheptanoic acid (PFHpA)	C7HF13O2	363.977	318.98	Negative	Industrial chemical
609	Perfluorohexadecanoic acid (PFHxDA)	C16HF31O2	813.948	768.967	Negative	Industrial chemical
610	Perfluorohexane sulfonic acid (PFHxS)	C6HF13O3S	399.944	-	Negative	Industrial chemical
611	Perfluorohexanoic acid (PFHxA)	C6HF11O2	313.98	-	Negative	Industrial chemical
612	Perfluorononanoic acid (PFNA)	C9HF17O2	463.971	-	Negative	Industrial chemical
613	Perfluorooctane sulfonic acid (PFOS)	C8HF17O3S	499.937	-	Negative	Industrial chemical
614	Perfluorooctanoic acid (PFOA)	C8HF15O2	413.974	-	Negative	Industrial chemical
615	Perfluoropentanoic acid (PFPeA)	C5HF9O2	263.983	-	Negative	Industrial chemical
616	Perfluorotetradecanoic acid (PFTeDA)	C14HF27O2	713.955	668.975	Negative	Industrial chemical
617	Perfluoroundecanoic acid (PFUnDA)	C11HF21O2	563.964	518.974	Negative	Industrial chemical
618	10,11-Dihydro-10Negativeydroxycarbamazepine	C15H14N2O2	254.106	253.098	Positive	Pharmaceutical
619	10,11-Dihydrocarbamazepine	C15H14N2O	238.111	237.103	Positive	Pharmaceutical
620	Aceclofenac	C16H13Cl2NO4	353.022	310.02	Negative	Pharmaceutical
621	Acetaminophen	C8H9NO2	151.063	110.061	Positive	Pharmaceutical
622	Amitryptiline	C20H23N	277.183	233.133	Positive	Pharmaceutical
623	Amlodipine	C20H25ClN2O5	408.145	238.086	Positive	Pharmaceutical
624	Amoxicillin	C16H19N3O5S	365.105	349.085	Negative	Pharmaceutical
625	Atenolol	C14H22N2O3	266.163	145.065	Positive	Pharmaceutical
626	Atorvastatin	C33H35FN2O5	558.253	440.233	Negative	Pharmaceutical
627	Azithromycin	C38H72N2O12	748.509	591.431	Positive	Pharmaceutical
628	Bezafibrate	C19H20ClNO4	361.108	274.097	Positive	Pharmaceutical
629	Bicalutamide	C18H14F4N2O4S	430.061	255.045	Negative	Pharmaceutical
630	Bisoprolol	C18H31NO4	325.225	116.071	Positive	Pharmaceutical
631	Budesonide	C25H34O6	430.236	413.205	Positive	Pharmaceutical
632	Carazolol	C18H22N2O2	298.168	116.071	Positive	Pharmaceutical
633	Carbamazepine	C15H12N2O	236.095	194.096	Positive	Pharmaceutical
634	Carbamazepine 10,11-epoxide	C15H12N2O2	252.09	180.081	Positive	Pharmaceutical
635	Cetirizine	C21H25ClN2O3	388.155	201.071	Positive	Pharmaceutical
636	Chloramphenicol	C11H12Cl2N2O5	322.012	152.997	Negative	Pharmaceutical
637	Chloroquine	C18H26ClN3	319.182	247.134	Positive	Pharmaceutical
638	Ciprofloxacin	C17H18FN3O3	331.133	314.13	Positive	Pharmaceutical
639	Citalopram	C20H21FN2O	324.164	-	Positive	Pharmaceutical
640	Clarithromycin	C38H69NO13	747.477	-	Positive	Pharmaceutical
641	Clindamycin	C18H33ClN2O5S	424.18	126.128	Positive	Pharmaceutical
642	Clopidogrel	C16H16ClNO2S	321.059	212.016	Positive	Pharmaceutical
643	Clozapine	C18H19ClN4	326.13	270.079	Positive	Pharmaceutical
644	Codeine	C18H21NO3	299.152	215.108	Positive	Pharmaceutical
645	Desvenlafaxine	C16H25NO2	263.189	246.149	Positive	Pharmaceutical
646	Diclofenac	C14H11Cl2NO2	295.017	250.019	Negative	Pharmaceutical
647	Diltiazem	C22H26N2O4S	414.161	178.065	Positive	Pharmaceutical
648	Enalapril	C20H28N2O5	376.2	234.113	Positive	Pharmaceutical
649	Erythromycin	C37H67NO13	733.461	576.386	Positive	Pharmaceutical
650	Fenbendazole	C15H13N3O2S	299.073	268.021	Positive	Pharmaceutical
651	Fenofibrate	C20H21ClO4	360.113	233.018	Positive	Pharmaceutical
652	Fexofenadine	C32H39NO4	501.288	466.271	Positive	Pharmaceutical
653	Fluconazole	C13H12F2N6O	306.104	220.039	Positive	Pharmaceutical
654	Fluoxetine	C17H18F3NO	309.134	148.076	Positive	Pharmaceutical
655	Glibenclamide	C23H28ClN3O5S	493.144	369.101	Positive	Pharmaceutical
656	Glimepiride	C24H34N4O5S	490.225	352.085	Positive	Pharmaceutical
657	Haloperidol	C21H23ClFNO2	375.14	165.071	Positive	Pharmaceutical
658	Hydrochlorothiazide (HCTZ)	C7H8ClN3O4S2	296.964	205.932	Negative	Pharmaceutical
659	Ifosfamide	C7H15Cl2N2O2P	260.025	92.0262	Positive	Pharmaceutical
660	Ivermectin B1a	C48H74O	874.508	753.444	Negative	Pharmaceutical
661	Ketoconazole	C26H28Cl2N4O4	530.149	-	Positive	Pharmaceutical
662	Ketoprofen	C16H14O3	254.094	-	Positive	Pharmaceutical
663	Levamisole	C11H12N2S	204.072	178.062	Positive	Pharmaceutical
664	Lidocaine	C14H22N2O	234.173	86.0964	Positive	Pharmaceutical
665	Loperamide	C29H33ClN2O2	476.223	266.166	Positive	Pharmaceutical
666	Loratadine	C22H23ClN2O2	382.145	337.102	Positive	Pharmaceutical
667	Losartan	C22H23ClN6O	422.162	207.092	Positive	Pharmaceutical
668	Mebendazole	C16H13N3O3	295.096	264.032	Positive	Pharmaceutical
669	Meclofenamic acid	C14H11Cl2NO2	295.017	252.024	Negative	Pharmaceutical
670	Mefenamic acid	C15H15NO2	241.11	196.113	Negative	Pharmaceutical
671	Memantine	C12H21N	179.167	163.148	Positive	Pharmaceutical
672	Methadone	C21H27NO	309.209	105.034	Positive	Pharmaceutical
673	Methotrexate	C20H22N8O5	454.171	308.066	Positive	Pharmaceutical
674	Metoprolol	C15H25NO3	267.183	116.071	Positive	Pharmaceutical
675	Metronidazole	C6H9N3O3	171.064	-	Positive	Pharmaceutical
676	Mirtazapine	C17H19N3	265.158	-	Positive	Pharmaceutical
677	N, N-Dimethyltetradecylamine	C16H35N	241.277	58.0651	Positive	Industrial chemical
678	Natamycin	C33H47NO13	665.305	503.25	Positive	Pharmaceutical
679	N-Desmethylcitalopram	C19H20FN2O	310.148	262.124	Positive	Pharmaceutical
680	Niflumic acid	C13H9F3N2O2	282.062	237.994	Negative	Pharmaceutical
681	Norfluoxetine	C16H16F3NO	295.118	134.096	Positive	Pharmaceutical
682	Ofloxacin	C18H20FN3O4	361.144	318.124	Positive	Pharmaceutical
683	Omeprazole	C17H19N3O3S	345.115	198.058	Positive	Pharmaceutical
684	Oxazepam	C15H11ClN2O2	286.051	241.041	Positive	Pharmaceutical
685	Oxycodone	C18H21NO4	315.147	298.144	Positive	Pharmaceutical
686	Panthenol	C9H19NO4	205.131	90.055	Positive	Pharmaceutical
687	Paroxetine	C19H20FNO3	329.143	192.081	Positive	Pharmaceutical
688	Phenazone	C11H12N2O	188.095	111.055	Positive	Pharmaceutical
689	Propranolol	C16H21NO2	259.157	183.101	Positive	Pharmaceutical
690	Pyridoxine	C8H11NO3	169.074	152.071	Positive	Pharmaceutical
691	Pyrimethamine	C12H13ClN4	248.083	231.114	Positive	Pharmaceutical
692	Ramipril	C23H32N2O5	416.231	-	Positive	Pharmaceutical
693	Ranitidine	C13H22N4O3S	314.141	-	Positive	Pharmaceutical
694	Roxithromycin	C41H76N2O15	836.525	-	Positive	Pharmaceutical
695	Salbutamol	C13H21NO3	239.152	222.149	Positive	Pharmaceutical
696	Sebacic acid	C10H18O4	202.121	157.143	Negative	Pharmaceutical
697	Sertraline	C17H17Cl2N	305.074	159.012	Positive	Pharmaceutical
698	Simvastatin	C25H38O5	418.272	199.096	Positive	Pharmaceutical
699	Sotalol	C12H20N2O3S	272.119	255.101	Positive	Pharmaceutical
700	Sparfloxacin	C19H22F2N4O3	392.166	375.14	Positive	Pharmaceutical
701	Sulfaclozine	C14H14N4O3S	284.013	156.012	Positive	Pharmaceutical
702	Sulfamethoxazole	C10H11N3O3S	253.052	156.012	Positive	Pharmaceutical
703	Sulindac	C20H17FO3S	356.088	-	Positive	Pharmaceutical
704	Sulisobenzone	C14H12O6S	308.035	-	Negative	Pharmaceutical
705	Tamoxifen	C26H29NO	371.225	72.0813	Positive	Pharmaceutical
706	Terbutaline	C12H19NO3	225.136	152.071	Positive	Pharmaceutical
707	Theobromine (Theophylline - isomere)	C7H8N4O2	180.065	138.066	Positive	Pharmaceutical
708	Tiamulin	C28H47NO4S	493.323	192.102	Positive	Pharmaceutical
709	Tramadol	C16H25NO2	263.189	58.0651	Positive	Pharmaceutical
710	Triclosan	C12H7Cl3O2	287.951	35.9767	Negative	Pharmaceutical
711	Trimethoprim	C14H18N4O3	290.138	230.092	Positive	Pharmaceutical
712	Valproic acid	C8H16O2	144.115	99.081	Negative	Pharmaceutical
713	Valsartan	C24H29N5O3	435.227	291.171	Negative	Pharmaceutical
714	Venlafaxine	C17H27NO2	277.204	121.065	Positive	Pharmaceutical
715	Verapamil	C27H38N2O4	454.283	165.091	Positive	Pharmaceutical
716	Benzyl butyl phthalate (BBP)	C19H20O4	312.136	149.023	Positive	Industrial chemical
717	Bis(2-ethylhexyl) phthalate (DEHP)	C24H38O4	390.277	279.159	Positive	Industrial chemical
718	Dibutyl phthalate (DP)	C16H22O4	278.152	-	Positive	Industrial chemical
719	Monobenzyl Phthalate (MP)	C15H12O4	256.074	-	Negative	Industrial chemical
720	Monobutyl Phthalate (MBP)	C12H14O4	222.089	-	Negative	Industrial chemical
721	Dodecamethylpentasiloxane	C12H36O4Si5	384.146	-	Positive	Industrial chemical
722	Hexamethylcyclotrisiloxane	C6H18O3Si3	222.056	-	Positive	Industrial chemical
723	4-Dodecylbenzenesulfonic acid	C18H30O3S	326.192	-	Negative	Industrial chemical
724	Laureth-5	C16H34O6	406.329	133.101	Positive	Industrial chemical
725	Laurilsulfate	C12H25NaO4S	266.155	96.9596	Negative	Industrial chemical
726	Octaethylene glycol	C16H34O9	370.22	133.101	Positive	Industrial chemical
727	4Negativeydroxitamoxifen	C26H29NO2	388.227	72.0808	Positive	Pharmaceutical
728	4Negativeydroxybenzothiazole/OBT	C7H5NOS	152.016	109.968	Positive	Pharmaceutical
729	Ambroxol	C13H18Br2N2O	376.986	263.901	Positive	Pharmaceutical
730	Anastrozole	C17H19N5	294.171	225.123	Positive	Pharmaceutical
731	Azelastine	C22H24ClN3O	382.168	112.112	Positive	Pharmaceutical
732	Bentazone	C17H14F3N3O2S	239.05	197.976	Negative	Pharmaceutical
733	Benzethonium	C27H42ClNO2	412.321	91.0542	Positive	Pharmaceutical
734	Benzothiazole	C7H5NS	136.022	109.968	Positive	Pharmaceutical
735	Bosentan	C27H29N5O6S	552.191	202.082	Positive	Pharmaceutical
736	Bupropion	C13H18ClNO	240.115	184.053	Positive	Pharmaceutical
737	Celecoxib	C17H14F3N3O2	382.083	282.031	Positive	Pharmaceutical
738	Cetirizne	C21H25ClN2O3	389.163	-	Positive	Pharmaceutical
739	Chloridazon	C10H8ClN3O	222.043	175.976	Positive	Pharmaceutical
740	Chloroxuron	C15H15Cl2NO3	291.089	204.045	Positive	Pharmaceutical
741	Chlortoluron	C15H17ClN2O	213.079	72.0449	Positive	Pharmaceutical
742	Clofibric acid	C10H11ClO3	213.032	127.017	Negative	Pharmaceutical
743	Clonidine	C9H9Cl2N3	230.025	213.988	Positive	Pharmaceutical
744	Clopidrogel	C16H16ClNO2S	322.066	212.016	Positive	Pharmaceutical
745	Cortisone	C21H28O5	361.201	343.19	Positive	Pharmaceutical
746	Cyclophosphamide	C7H15Cl2N2O2P	261.032	92.0262	Positive	Pharmaceutical
747	Cyproterone	C22H27ClO3	375.172	357.179	Positive	Pharmaceutical
748	DEET	C12H17NO	192.138	119.049	Positive	Pesticide
749	Desloratadine	C19H19ClN2	311.131	259.092	Positive	Pharmaceutical
750	Dexamethasone	C22H29FO5	393.207	373.197	Positive	Pharmaceutical
751	Dichlorvos	C13H18ClNO2	220.953	109.967	Positive	Pharmaceutical
752	Dimethachlor	C13H18ClNO2	256.11	224.029	Positive	Pharmaceutical
753	Diphenhydramine	C17H21NO	256.17	167.085	Positive	Pharmaceutical
754	Dodemoprh	C18H35NO	282.279	114.091	Positive	Pharmaceutical
755	Domperidone	C22H24ClN5O2	426.169	175.075	Positive	Pharmaceutical
756	Drospirenone	C24H30O3	367.227	-	Positive	Pharmaceutical
757	Duloxetine	C18H19NOS	298.126	-	Positive	Pharmaceutical
758	EDDP	C20H23N	278.19	234.165	Positive	Pharmaceutical
759	Efavirenz	C14H9ClF3NO2	314.02	244.982	Negative	Pharmaceutical
760	Ethion	C9H22O4P2S4	384.995	199.965	Positive	Pharmaceutical
761	Exemestane	C20H24O2	297.185	121.065	Positive	Pharmaceutical
762	Fenoxycarb	C17H19NO4	302.139	116.049	Positive	Pharmaceutical
763	Finasteride	C23H36N2O2	373.285	305.222	Positive	Pharmaceutical
764	Flufenoxuron	C21H11ClF6N2O3	487.029	158.004	Negative	Pharmaceutical
765	Flumequine	C14H12FNO3	262.087	244.041	Positive	Pharmaceutical
766	Fluvoxamine	C15H21F3N2O2	319.163	261.124	Positive	Pharmaceutical
767	Genistin	C21H20O10	433.113	271.06	Positive	Pharmaceutical
768	Hydroxychloroquine	C18H26ClN3O	336.184	247.108	Positive	Pharmaceutical
769	Imatinib	C29H31N7O	494.266	394.177	Positive	Pharmaceutical
770	Imazalil	C14H14Cl2N2O	297.056	-	Positive	Pharmaceutical
771	Imipramine	C19H24N2	281.201	-	Positive	Pharmaceutical
772	Lenacil	C13H18N2O2	235.144	154.998	Positive	Pharmaceutical
773	Lorazepam	C15H11Cl2N2O2	321.019	275.024	Positive	Pharmaceutical
774	Mebeverine	C25H35NO5	430.259	121.065	Positive	Pharmaceutical
775	Medroxyprogesterone	C22H32O3	345.242	327.232	Positive	Pharmaceutical
776	Mefenamic acid	C15H15NO2	242.118	196.113	Positive	Pharmaceutical
777	Metamitron	C10H10N4O (NIST WebBook)	203.093	175.04	Positive	Pharmaceutical
778	Metconazole	C17H22ClN3O	320.152	159.092	Positive	Pharmaceutical
779	Metroprolol	C15H25NO3	268.191	116.071	Positive	Pharmaceutical
780	Miconazole	C18H14Cl4N2O	414.993	159.092	Positive	Pharmaceutical
781	Myclobutanil	C15H17ClN4	289.121	70.0651	Positive	Pharmaceutical
782	Mycophenolic acid	C17H20O6 (alsachim.com)	321.133	275.165	Positive	Pharmaceutical
783	Nitrofurantoin	C8H6N4O5 (NIST WebBook)	237.027	178.023	Negative	Pharmaceutical
784	Norgestimate	C25H31NO3	370.238	312.209	Positive	Pharmaceutical
785	Nortriptyline	C19H21N	264.175	233.133	Positive	Pharmaceutical
786	Ondansetron	C18H19N3O (Chembk)	294.16	170.096	Positive	Pharmaceutical
787	Oryzalin	C12H18N4O6S (NIST WebBook)	347.102	306.053	Positive	Pharmaceutical
788	Oxybutynin	C22H31NO3	358.238	142.123	Positive	Pharmaceutical
789	Pentoxiflylline	C13H18N4O3	279.145	181.071	Positive	Pharmaceutical
790	PFBS	C4HF9O3S	298.943	79.9574	Negative	Industrial chemical
791	PFOA	C8HF15O2	412.966	368.977	Negative	Industrial chemical
792	PFOS	C8F17SO3H	498.93	79.9574	Negative	Industrial chemical
793	PFOSA	C8F17NOS	497.946	78.9574	Negative	Industrial chemical
794	Pindolol	C14H20N2O3	249.16	116.071	Positive	Pharmaceutical
795	Pipamperone	C22H27N3O2	376.239	138.128	Positive	Pharmaceutical
796	Pirimiphos-methyl	C9H20NO3PS2	306.104	164.039	Positive	Pesticide
797	Pravastatin	C23H36O7	423.239	327.217	Negative	Pharmaceutical
798	Prednisone	C21H26O5	359.185	341.174	Positive	Pharmaceutical
799	Primidone	C12H14N2O2	219.113	162.029	Positive	Pharmaceutical
800	Propachlor	C9H10ClNO	212.084	170.004	Positive	Pharmaceutical
801	Propanil	C9H9ClN2O	218.013	161.963	Positive	Pharmaceutical
802	Propyphenazone	C19H22N2O2	231.149	188.071	Positive	Pharmaceutical
803	Pyrantel	C11H15N3S	207.095	150.014	Positive	Pharmaceutical
804	Raloxifene	C28H27NO4S	474.173	112.016	Positive	Pharmaceutical
805	Risperidone	C23H27FN4O2	411.219	191.049	Positive	Pharmaceutical
806	Ropinirole	C16H24N2O	261.196	135.08	Positive	Pharmaceutical
807	Spiroxamine	C13H17NO3	298.274	144.118	Positive	Pharmaceutical
808	Sulfadiazine	C10H10N4O2S	251.06	156.012	Positive	Pharmaceutical
809	Sulfamethazine	C12H14N4O2S	279.091	-	Positive	Pharmaceutical
810	Sulfapyridine	C11H11N3O2S	250.064	-	Positive	Pharmaceutical
811	Terbinafine	C21H25N	292.206	-	Positive	Pharmaceutical
812	Triadimenol	C15H19ClN2O	296.116	226.095	Positive	Pharmaceutical
813	Triamcinolone	C21H27FO6	395.186	415.199	Positive	Pharmaceutical
814	Triethylphosphate	C6H15O4P	183.078	99.0004	Positive	Pharmaceutical
815	Trimetoprim	C14H18N4O3	291.145	230.092	Positive	Pharmaceutical
816	Methyl acrylate	C4H6O2	86.09	59.0491	Positive	Industrial chemical
817	Ethyl acrylate	C5H8O2	100.12	73.0647	Positive	Industrial chemical
818	Butyl acrylate	C7H12O2	128.17	73.0647	Positive	Industrial chemical
819	2Negativeydroxyethyl acrylate	C5H8O3	116.12	89.0596	Positive	Industrial chemical
820	Propenoic acid 2-(dimethylamino)ethyl ester	C7H13NO2	143.18	72.0813	Positive	Industrial chemical
821	2-Ethylhexyl acrylate	C11H20O2	184.27	113.097	Positive	Industrial chemical
822	Acetone	C3H6O	58.08	-	Positive	Industrial chemical
823	Acetone Cyanohydrin	C4H7NO	85.1	-	Positive	Industrial chemical
824	Acephate	C4H10NO3PS	183.17	-	Positive	Industrial chemical
825	2-Aminophenol	C6H7NO	109.13	-	Positive	Industrial chemical
826	3-Aminophenol	C6H7NO	109.13	-	Positive	Industrial chemical
827	4-Aminophenol	C6H7NO	109.13	93.034	Positive	Industrial chemical
828	Isobutyraldehyde	C4H8O	72.11	55.0548	Positive	Industrial chemical
829	2-Isobutoxyethanol	C6H14O2	118.17	75.0446	Positive	Industrial chemical
830	Isoprene	C5H8	68.12	41.0386	Positive	Industrial chemical
831	Limonene	C10H16	136.23	93.0699	Positive	Pharmaceutical
832	Ivermectin	C48H74O14	875.11	753.444	Positive	Industrial chemical
833	Iminoctadine albesilate	C72H131N7O9S3	1335.05	281.245	Positive	Industrial chemical
834	2-Ethyl hexanoic acid	C8H16O2	144.21	125.097	Negative	Industrial chemical
835	Ethylene glycol	C2H6O2	62.07	45.0335	Negative	Industrial chemical
836	Ethylene glycol monoalkyl ether	C4H10O2	90.12	59.0497	Negative	Industrial chemical
837	Ethylene glycol monomethyl ether acetate	C8H16O3	160.21	75.0446	Positive	Industrial chemical
838	Ethylenediamine	C2H8N2	60.1	44.0495	Positive	Industrial chemical
839	Ethylenediaminetetraacetic acid	C10H16N2O8	292.24	-	Negative	Industrial chemical
840	Alkyldimethylbenzylammonium chloride	C17H30ClN	283.88	-	Positive	Pharmaceutical
841	Chloroethane	C2H5Cl	64.51	-	Positive	Industrial chemical
842	1-Ocatanol	C8H18O	130.23	-	Positive	Industrial chemical
843	Captan	C9H8Cl3NO2S	300.59	-	Positive	Pesticide
844	Glyphosate	C3H8NO5P	169.07	150.994	Negative	Pesticide
845	Glufosinate	C5H12NO4P	181.13	162.01	Negative	Pesticide
846	2-Cresol	C7H8O	108.14	91.0542	Negative	Pesticide
847	3-Cresol	C7H8O	108.14	91.0542	Negative	Pesticide
848	4-Cresol	C7H8O	108.14	91.0542	Negative	Pesticide
849	2-Chlorobenzyl Chloride	C7H6Cl2	161.03	125.015	Positive	Pharmaceutical
850	Chloroacetic Acid	C2H3ClO2	94.5	58.9956	Positive	Pesticide
851	Dichloroacetic Acid	C2H2Cl2O2	128.94	82.9454	Negative	Pharmaceutical
852	Trichloroacetic Acid	C2HCl3O2	163.39	116.906	Negative	Industrial chemical
853	2-Chloronitrobenzene	C6H4ClNO2	157.55	112.999	Negative	Industrial chemical
854	3-Chloronitrobenzene	C6H4ClNO2	157.55	112.999	Negative	Industrial chemical
855	4-Chloronitrobenzene	C6H4ClNO2	157.55	112.999	Negative	Industrial chemical
856	Vinyl acetate	C4H6O2	86.09	45.0335	Negative	Industrial chemical
857	Propylene Oxide	C3H6O	58.08	-	Negative	Industrial chemical
858	1,3-Dioxolane	C3H6O2	74.08	-	Positive	Pharmaceutical
859	Cyclohexanone	C6H10O	98.14	-	Positive	Pesticide
860	Cyclohexane	C6H12	84.16	-	Positive	Pesticide
861	N-(cyclohexylthio) phthalimide	C14H15NO2S	261.34	-	Positive	Industrial chemical
862	Dichlobenil	C7H3Cl2N	172.01	-	Positive	Pesticide
863	2,4-Dichlorotoluene	C7H6Cl2	161.03	-	Positive	Pesticide
864	1,3-Dichloro-2-propanol	C3H6Cl2O	128.99	-	Positive	Pesticide
865	2-Dichlorobenzene	C6H4Cl2	147	-	Positive	Pesticide
866	3-Dichlorobenzene	C6H4Cl2	147	111	Positive	Pesticide
867	4-Dichlorobenzene	C6H4Cl2	147	111	Positive	Pesticide
868	2,4-Dinitrophenol	C6H4N2O5	184.11	153.995	Negative	Pesticide
869	Cyhalofop Butyl	C20H20FNO4	357.38	256.056	Negative	Pesticide
870	Phenyl Ether	C12H10O	170.21	93.0335	Positive	Personal care product
871	Dibutyltin dichloride	C8H18Cl2Sn	303.85	177.017	Positive	Industrial chemical
872	Dibutyltin dilaurate	C32H64O4Sn	631.57	177.017	Positive	Industrial chemical
873	2,6-Di-tert-butyl-p-cresol	C15H24O	220.35	205.159	Negative	Food additive
874	Dibenzyl ether	C14H14O	198.26	91.0542	Negative	Industrial chemical
875	2,4-Di-tert-pentylphenol	C16H26O	234.38	247.206	Negative	Industrial chemical
876	N-[3-(dimethylamino)propyl] stearamide	C23H48N2O	368.64	85.0655	Positive	Industrial chemical
877	Dimethyl Disulfide	C2H6S2	94.2	62.9897	Positive	Food additive
878	N,N-Dimethyldodecylamine	C14H31N	213.4	-	Positive	Industrial chemical
879	N,N-Dimethyldodecylamine N-oxide	C14H31NO	229.4	-	Positive	Personal care product
880	3-Dimethylaminopropylamine	C5H14N2	102.18	-	Positive	Personal care product
881	Dimethylformamide	C3H7NO	73.1	-	Positive	Pesticide
882	Tetramethylammonium hydroxide	C4H13NO	91.15	59.0735	Positive	Industrial chemical
883	Thiourea	CH4N2S	76.12	59.995	Positive	Pesticide
884	2,4-Dichlorophenoxyacetic acid	C8H6Cl2O3	221.04	160.952	Negative	Pesticide
885	Decanoic acid	C10H20O2	172.26	153.128	Negative	Industrial chemical
886	Decyl alcohol	C10H22O	158.28	141.164	Negative	Personal care product
887	Tetraethylenepentamine	C8H23N5	189.3	129.15	Positive	Industrial chemical
888	Tetrahydromethylphthalic anhydride	C9H10O3	166.17	162.047	Negative	Industrial chemical
889	Phytol	C20H40O	296.53	123.117	Negative	Industrial chemical
890	Dimethyl Terephthalate	C10H10O4	194.18	163.039	Negative	Industrial chemical
891	1-Dodecanol	C12H26O	186.33	169.195	Negative	Industrial chemical
892	Lauroylamide Propylbetaine	C19H38N2O3	342.52	-	Negative	Personal care product
893	Methyl laurate	C13H26O2	214.34	-	Negative	Industrial chemical
894	Tert-dodecylthiol	C12H26S	202.4	-	Negative	Industrial chemical
895	Sodium dodecyl sulfate	C12H25NaO4S	288.38	-	Negative	Industrial chemical
896	Triethylene Glycol Dimethyl Ether	C8H18O4	178.23	-	Positive	Industrial chemical
897	Triglycidyl Isocyanurate	C12H15N3O6	297.26	-	Positive	Industrial chemical
898	Triclosan and chlorine adducts	C12H7Cl3O2	289.55	-	Negative	Industrial chemical
899	1,2,3-Trichloropropane	C3H5Cl3	147.43	-	Negative	Industrial chemical
900	Trifluralin	C13H16F3N3O4	335.28	336.0802​, 290.0905	Positive	Industrial chemical
901	3,5,5-Trimethyl hexanol	C9H20O	144.25	-	Positive	Industrial chemical
902	Naphthalene	C10H8	128.17	102.0469​, 76.0469	Positive	Industrial chemical
903	Hexamethylene diacrylate	C12H18O4	226.27	-	Positive	Industrial chemical
904	Sodium nitriloacetate	C6H7NNa2O6	235.1	-	Positive	Industrial chemical
905	N-Nitrosodibutylamine	C8H18N2O	158.24	-	Positive	Industrial chemical
906	2-Nitrotoluene	C7H7NO2	137.14	91.0548, 105.034	Positive	Industrial chemical
907	3-Nitrotoluene	C7H7NO2	137.14	-	Positive	Industrial chemical
908	4-Nitrotoluene	C7H7NO2	137.14	-	Positive	Industrial chemical
909	Nitrobenzene	C6H5NO2	123.11	77.0391​, 120.0575​	Positive	Industrial chemical
910	Nitromethane	CH3NO2	61.04	-	Positive	Industrial chemical
911	1-Nonanol	C9H20O	144.25	-	Positive	Industrial chemical
912	1Negativeydroxyethane-1,1-diphosphonic Acid	C2H8O7P2	206.03	-	Positive	Industrial chemical
913	Hydroquinone	C6H6O2	110.11	109.0295, 81.0340​	Negative	Personal care product
914	Biphenyl	C12H10	154.21	-	Negative	Pesticide
915	Catechol	C6H6O2	110.11	-	Negative	Industrial chemical
916	Fentrazamide	C16H20ClN5O2	349.82	-	Positive	Pesticide
917	Phthalide	C8H2Cl4O2	271.91	-	Positive	Pharmaceutical
918	1,3-Butadiene	C4H6	54.09	-	Positive	Industrial chemical
919	Diallyl Phthalate	C14H14O4	246.26	149.023	Positive	Industrial chemical
920	Diisobutyl Phthalate	C16H22O4	278.34	149.023	Positive	Industrial chemical
921	Bis(2-methoxyethyl) phthalate	C14H18O6	282.29	149.023	Positive	Industrial chemical
922	2-Butanone Oxime	C4H9NO	87.12	56.0495	Positive	Industrial chemical
923	Tert-Butyl Hydroperoxide	C4H10O2	90.12	73.0648	Positive	Industrial chemical
924	2-sec-Butylphenol	C10H14O	150.22	133.101	Negative	Industrial chemical
925	4-tert-Butylphenol	C10H14O	150.22	135.117	Negative	Industrial chemical
926	N-tert-Butyl-2-benzothiazolesulfenamide	C11H14N2S2	238.37	150.018	Negative	Industrial chemical
927	Crotonaldehyde	C4H6O	70.09	53.0386	Negative	Pesticide
928	Pretilachlor	C17H26ClNO2	311.85	252.057	Positive	Pesticide
929	Procymidone	C13H11Cl2NO2	284.14	96.0212	Positive	Pesticide
930	1,2-Propanediol	C3H8O2	76.09	59.0497	Negative	Industrial chemical
931	Probenazole	C10H9NO3S	223.25	105.999	Positive	Pesticide
932	1-bromopropane	C3H7Br	122.99	-	Positive	Pesticide
933	Hexadecyltrimethylammonium hydrochloride	C19H43NO	301.6	-	Positive	Industrial chemical
934	Hexane	C6H14	86.18	-	Negative	Industrial chemical
935	Benomyl	C14H18N4O3	290.32	-	Negative	Pesticide
936	Pentadecafluorooctanoic Acid	C8HF15O2	414.07	-	Negative	Industrial chemical
937	Heptadecafluorooctanesulfonic Acid	C8HF17O3S	500.13	-	Negative	Industrial chemical
938	Benzotrichloride	C7H5Cl3	195.47	252.0939, 226.0783​	Negative	Pesticide
939	Benzo(a)pyrene	C20H12	252.31	-	Positive	Pharmaceutical
940	Pentachlorobenzene	C6HCl5	250.34	-	Positive	Pesticide
941	1-Chloronaphthalene	C10H7Cl	162.62	-	Positive	Pesticide
942	Methacrylic Acid	C4H6O2	86.09	55.0178​, 41.0391	Positive	Industrial chemical
943	Glycidyl Methacrylate	C7H10O3	142.15	69.0335	Positive	Industrial chemical
944	2-(Dimethylamino)ethyl Methacrylate	C8H15NO2	157.21	113.06	Positive	Industrial chemical
945	1-Methylnaphthalene	C11H10	142.2	128.063	Positive	Industrial chemical
946	2-Methylnaphthalene	C11H10	142.2	128.063	Positive	Industrial chemical
947	Tris(2-ethylhexyl) Phosphate	C24H51O4P	434.63	281.248	Positive	Industrial chemical
948	Tris(2-chloroethyl) Phosphate	C6H12Cl3O4P	285.49	98.9842	Positive	Industrial chemical
949	Tricresyl Phosphate	C21H21O4P	368.36	261.067	Positive	Industrial chemical
950	Triphenyl Phosphate	C18H15PO4	326.28	215.046	Positive	Industrial chemical
951	Tris(1,3-dichloro-2-propyl) Phosphate	C9H15Cl6O4P	430.9	98.9842	Positive	Industrial chemical

## Sheet: level 2
Table S5 List of compounds at confidence level 2 and their properties
Number	Precursor ion m/z	Mean RT (min)	Concentration by Quantem software (ng/L)				Neutral (Da)	Reference Ion	Mass error (ppm)	Chemical formula Chemspider	Mzcloud ion product matching	mzCloud matching scores	No. of proposed structures	B.P.	log Kow	CAS NO	Category
			CPR	PhR	PIR	UTR								(ºC)
Penbutolol	292.226	8.2	4.56	6.99	1.17	1.89	291.22	[M+H]+1	-4	C18 H29 N O2	#VALUE!	42.6	79	N/A	3.25	38363-40-5	Pharmaceutical
Lenacil	235.143	7.4	26.9	11.5	5.76	38.9	234.137	[M+H]+1	-4.8	C13 H18 N2 O2	#VALUE!	44.3	403	N/A	1.9	2164-08-01	Pesticide
Acetamiprid	223.073	8.7	13.1	6.96	1.95	2.17	222.067	[M+H]+1	-4.8	C10 H11 Cl N4	#VALUE!	47.4	20	N/A	0.8	135410-20-7	Pesticide
Terbuthylazine	230.116	10	1.15	6.03	8.37	0.71	229.109	[M+H]+1	-4.3	C9 H16 Cl N5	#VALUE!	53.5	52	N/A	2.7	5915-41-3	Pesticide
Lidocaine	235.179	7.9	0.58	1.62	0.39	0.77	234.173	[M+H]+1	-4.8	C14 H22 N2 O	#VALUE!	78.6	211	N/A	2.5	137-58-6	Pharmaceutical
Spiroxamine	298.273	10.6	2.72	0.32	25.9	0.59	297.267	[M+H]+1	-4.1	C18 H35 N O2	#VALUE!	85.3	41	135	3.9	118134-30-8	Pharmaceutical
Benzyl butyl phthalate	313.142	10.5	24.3	44.5	64.5	28.6	312.136	[M+H]+1	-4.9	C19 H20 O4	#VALUE!	89.9	199	370	4.9	85-68-7	Industrial chemical
Diuron	233.023	9.7	48.5	78.8	223.2	43.3	232.017	[M+H]+1	-4.6	C9 H10 Cl2 N2 O	#VALUE!	94.6	54	N/A	2.9	330-54-1	Pesticide
Triazophos	314.071	10	31.2	2.06	2.1	3.12	313.065	[M+H]+1	-4.4	C12 H16 N3 O3 P S	#VALUE!	99	41	N/A	3.7	24017-47-8	Pesticide
Propiconazole	342.075	10.3	6435	254	330	0	341.07	[M+H]+1	-4.7	C15 H17 Cl2 N3 O2	#VALUE!	99.3	14	N/A	3.7	60207-90-1	Pesticide
Tramadol	264.195	8.2	8.28	6.52	19.2	3.77	263.188	[M+H]+1	-3.4	C16 H25 N O2	#VALUE!	99.9	260	N/A	1.35	27203-73-2	Pharmaceutical
Clomazone	240.077	9.8	146	3	2.63	2.45	239.071	[M+H]+1	-4.8	C12 H14 Cl N O2	#VALUE!	99	154	275	2.45	81777-89-1	Pesticide
Venlafaxine	278.211	8.3	1.86	3.73	5.67	35.4	277.204	[M+H]+1	-3.6	C17 H27 N O2	#VALUE!	31.1	126	N/A	2.1	93413-62-8	Pharmaceutical
17beta-Estradiol	273.184	9.8	9.1	30.4	15.3	25.5	272.178	[M+H]+1	-3.5	C18 H24 O2	#VALUE!	34	151	N/A	3.7	50-28-2	Pharmaceutical
Primidone	219.112	7.9	18.3	18.2	50	31.7	218.106	[M+H]+1	-4.9	C12 H14 N2 O2	#VALUE!	37.3	540	N/A	0.25	125-33-7	Pharmaceutical
Normeperidine	234.148	7.6	6.46	4.7	4.3	12.7	233.142	[M+H]+1	-4.2	C14 H19 N O2	#VALUE!	52.8	587	N/A	1.6	77-17-8	Pharmaceutical
Ciprofloxacin	332.139	8.1	0.69	32	5.37	8.14	331.133	[M+H]+1	-4.7	C17 H18 F N3 O3	#VALUE!	67.2	75	N/A	-0.45	85721-33-1	Pharmaceutical
Hexazinone	253.165	9.4	4.03	49.3	0.69	0.65	252.159	[M+H]+1	-4.2	C12 H20 N4 O2	#VALUE!	67.1	39	N/A	1.2	51235-04-2	Pesticide
Galaxolidone	273.184	10.5	933	2046	7120	6131	272.178	[M+H]+1	-3.9	C18 H24 O2	#VALUE!	69.3	151	142.5	5.6	1222-05-5	Personal care product
Phenolphthalein	319.095	9.3	10.1	60.9	42.8	37.1	318.089	[M+H]+1	-4.4	C20 H14 O4	#VALUE!	86	86	N/A	2.45	77-09-8	Industrial chemical
Metolachlor morpholinone	234.148	7.7	29.3	29.2	5.21	10.5	233.142	[M+H]+1	-4.5	C14 H19 N O2	#VALUE!	51.9	587	N/A	N/A	120375-14-6	Pesticide
Triphenylphosphine oxide	279.092	9.9	61.5	53.5	45.2	83.9	278.086	[M+H]+1	-3.8	C18 H15 O P	#VALUE!	90.1	6	360	3.65	791-28-6	Industrial chemical
Climbazole	293.104	9.6	3.24	1.89	105	2.03	292.098	[M+H]+1	-3.7	C15 H17 Cl N2 O2	#VALUE!	61	73	N/A	3.3	38083-17-9	Personal care product
Pendimethalin	282.144	10.8	0	43322	0	0	281.138	[M+H]+1	-3.5	C13 H19 N3 O4	#VALUE!	57.2	2	200	5.1	40487-42-1	Pesticide
Metalaxyl	280.153	9.6	85.4	27.5	246	65	279.147	[M+H]+1	-3.8	C15 H21 N O4	#VALUE!	96.4	305	N/A	1.7	57837-19-1	Pesticide
Buprofezin	306.162	10.6	4.9	3.57	7.09	12.3	305.156	[M+H]+1	-4.4	C16 H23 N3 O S	#VALUE!	96.5	20	N/A	4.1	69327-76-0	Pesticide
Pretilachlor	312.171	10.5	52.5	3.3	306	1.42	311.165	[M+H]+1	-4.7	C17 H26 Cl N O2	#VALUE!	83.7	66	N/A	3.9	51218-49-6	Pesticide
Tebuconazole	308.151	10.2	19	0.76	0.89	0.8	307.145	[M+H]+1	-4.4	C16 H22 Cl N3 O	#VALUE!	97.3	11	N/A	3.7	107534-96-3	Pesticide
Atrazine	216.1	9.8	1157	0	18112	0	215.094	[M+H]+1	-4.9	C8 H14 Cl N5	#VALUE!	70.8	48	N/A	2.6	1912-24-9	Pesticide
Erucamide	338.34	12.1	12398	28985	0	24226	337.334	[M+H]+1	-5	C22 H43 N O	#VALUE!	97.3	25	202.5	7.35	112-84-5	Industrial chemical
Oleamide	282.278	11.1	0	17509	0	20379	281.272	[M+H]+1	-4	C18 H35 N O	#VALUE!	98	54	202.5	6.35	301-02-0	Industrial chemical
17beta-Trenbolone	271.168	10.2	678	1899	908	3311	270.162	[M+H]+1	-3.8	C18 H22 O2	#VALUE!	74.9	164	N/A	3.9	10161-22-9	Pharmaceutical
Sulfadiazine	251.059	7.5	3.04	31.1	217.2	6.85	250.053	[M+H]+1	-3.8	C10 H10 N4 O2 S	#VALUE!	90.9	43	N/A	0.25	68-35-9	Pharmaceutical
Ametryn	228.127	9.8	27.3	101.4	3.56	3.54	227.12	[M+H]+1	-4.4	C9 H17 N5 S	#VALUE!	83.9	2	N/A	2.9	834-12-8	Pesticide
Thiamethoxam	292.025	8.1	81.3	116	143.5	21.9	291.019	[M+H]+1	-4.2	C8 H10 Cl N5 O3 S	#VALUE!	93.8	24	N/A	0.13	153719-23-4	Pesticide
Alachlor	270.125	10.6	393	294	72704	0	269.118	[M+H]+1	-3.6	C14 H20 Cl N O2	#VALUE!	88.2	89	130	3	15972-60-8	Pesticide
Trimethoprim	291.144	7.9	0.45	7.8	20.3	1.69	290.138	[M+H]+1	-3.9	C14 H18 N4 O3	#VALUE!	93.2	61	N/A	1.05	738-70-5	Pharmaceutical
Imidacloprid	256.058	8.5	24.1	73	70.9	159	255.052	[M+H]+1	-4.2	C9 H10 Cl N5 O2	#VALUE!	96.2	9	N/A	0.57	138261-41-3	Pesticide
2-Naphthalenesulfonic acid or Naphthalene-2-sulfonic acid	207.012	8.7	68.1	0	6211	877	208.019	[M-H]-1	0.6	C10 H8 O3 S	#VALUE!	45.2	30	N/A	-0.75	120-18-3	Industrial chemical
Propylparaben	179.071	12.1	27.1	58	57.5	318	180.079	[M-H]-1	0.3	C10 H12 O3	#VALUE!	57.8	719	295	1.83	94-13-3	Personal care product
Perfluorooctanoic acid (PFOA)	412.967	12.5	1.5	73.4	1.37	112	413.974	[M-H]-1	0.4	C8 H F15 O2	#VALUE!	65.8	43	189	5.55	335-67-1	Industrial chemical
Terephthalic acid	165.019	8.6	344	52.5	65.4	744	166.027	[M-H]-1	0.5	C8 H6 O4	#VALUE!	79.9	62	300	1.85	100-21-0	Industrial chemical
Butylparaben	193.087	12.2	29.5	73.8	44.5	299	194.094	[M-H]-1	-0.5	C11 H14 O3	#VALUE!	92.6	816	295	2.4	94-26-8	Personal care product
2,4-Dichlorophenoxyacetic acid	218.962	12	7.38	278	311	290	219.969	[M-H]-1	0.1	C8 H6 Cl2 O3	#VALUE!	91.4	41	N/A	2.8	94-75-7	Pesticide
Mefenamic acid	240.103	13	3.48	1.94	63	230	241.11	[M-H]-1	0.4	C15 H15 N O2	#VALUE!	93	474	N/A	5	61-68-7	Pharmaceutical
Stearic acid	283.264	11.9	0.9	3.41	267	138	284.272	[M-H]-1	-0.1	C18 H36 O2	#VALUE!	50	148	376	8.23	57-11-4	Personal care product
Lauryl sulfate	265.148	11.5	10.4	6.57	435	212	266.155	[M-H]-1	-0.5	C12 H26 O4 S	#VALUE!	99.2	6	N/A	Not applicable	151-21-3	Industrial chemical
Dinoterb	239.067	12.8	10.3	11.4	16.9	118	240.075	[M-H]-1	0.2	C10 H12 N2 O5	#VALUE!	64.2	70	N/A	4.5	1420-07-1	Pesticide
2,4-Dinitrophenol	183.005	13.7	96.6	1.47	1.51	96	184.012	[M-H]-1	-0.3	C6 H4 N2 O5	#VALUE!	35.5	24	290	1.65	51-28-5	Pesticide
Bentazone	239.05	11.7	148	4.94	2.99	167	240.057	[M-H]-1	0.8	C10 H12 N2 O3 S	#VALUE!	88.6	72	N/A	0.77	25057-89-0	Pharmaceutical
4-Dodecylbenzenesulfonic acid	325.184	13.5	0	18699	9623	258362	326.192	[M-H]-1	-1.3	C18 H30 O3 S	#VALUE!	99.4	19	N/A	6.25	27176-87-0	Industrial chemical
B.P. (oC) and log Kow collected from PubChem database; ChemSpider database; EPA, 2011; Li Xie et al., 2021

## Sheet: level 3
Table S6 List of compounds at confidence level 3 and their properties
Number	Precursor ion m/z	Mean RT (min)	Average peak intensity (10^5)				Neutral mass (Da)	Reference Ion	Mass error (ppm)	Chemical formula Chemspider	Product ion (m/z) matching	No. of proposed stuctures	B.P.(ºC)	log Kow	CAS NO	Category
			CPR	PhR	PIR	UTR
Hexa(methoxymethyl)melamine	391.228	15.1	180.8	0	116	72.1	390.223	[M+H]+1	-4.8	C15 H30 N6 O6	177.0877, 253.1387	28	N/A	2	3089-11-0	Industrial chemical
Lopinavir	651.352	9.5	13.9	41	13.4	15.5	628.362	[M+Na]+1	0.2	C37 H48 N4 O5	447.2640, 183.1130	10	N/A	5.1	192725-17-0	Pharmaceutical
Estradiol benzoate	377.212	9.2	57.6	20.6	15.1	1045.8	376.204	[M+H]+1	3.1	C25 H28 O3	255.1746, 271.1694	45	N/A	5.7	50-50-0	Pharmaceutical
Methylprednisolone	375.217	13.6	0	67	174.9	0	374.209	[M+H]+1	1.9	C22 H30 O5	357.206, 339.195	62	N/A	1.55	83-43-2	Pharmaceutical
Spirotetramat	374.197	10	46.2	63.3	43.4	440.1	373.189	[M+H]+1	3.3	C21 H27 N O5	304.1905, 79.0211	48	N/A	3.6	203313-25-1	Pesticide
Quizalofop-ethyl	373.096	2.9	0	2910.4	3210	1642	372.088	[M+H]+1	1.6	C19 H17 Cl N2 O4	299.06064, 91.05712	48	N/A	4.5	76578-14-8	Pesticide
Pyridaben	365.147	10.6	0	10.6	10.7	0	364.138	[M+H]+1	4.6	C19 H25 Cl N2 O S	307.2709, 240.23117	39	N/A	6.3	96489-71-3	Pesticide
Nalmefene	340.192	10	2137.6	21.1	82.7	20.2	339.183	[M+H]+1	5	C21 H25 N O3	340.20828, 204.13713	125	N/A	2.4	55096-26-9	Pharmaceutical
Mandestrobin	314.174	10.4	14.3	16.4	16.8	455.5	313.168	[M+H]+1	-4.3	C19 H23 N O3	200.06921, 242.11644	4	N/A	3.4	173662-97-0	Pesticide
N-Methyldidecylamine	312.361	14.6	84.1	30.3	0	78.6	311.355	[M+H]+1	-4.5	C21 H45 N	312.36124, 60.08089	6	210	6.5	20630-75-5	Pharmaceutical
Dipentyl phthalate	307.189	9.8	10703.1	13493.5	4305.4	8222.9	306.183	[M+H]+1	-4.7	C18 H26 O4	145.10030, 119.08504	137	338	5.75	131-18-0	Industrial chemical
Tetra(methoxymethyl)melamine (TMMM)	303.176	8.8	456.1	54.8	128	1243.3	302.17	[M+H]+1	-4.1	C11 H22 N6 O4	165.08725, 147.07936	15	N/A	1	4124-78-1	Industrial chemical
Vortioxetine	299.158	7.8	31.1	95	44.9	52.9	298.15	[M+H]+1	1.4	C18 H22 N2 S	283.02939, 268.99603	27	N/A	3.25	508233-74-7	Natural product
Isoprothiolane	291.071	10	2025.2	28	186.2	13.5	290.065	[M+H]+1	-4.3	C12 H18 O4 S2	188.96626, 144.97681	8	N/A	2.5	31088-93-4	Pesticide
N,N-Bis(2-hydroxyethyl)dodecanamide	288.252	9.8	32589.9	16.8	21358.6	33.7	287.246	[M+H]+1	-4.1	C16 H33 N O3	227.19928, 106.08596	21	N/A	N/A	120-40-1	Personal care product
Vulgarin	265.142	17.3	10.9	33.1	10.7	27.9	264.136	[M+H]+1	-3.7	C15 H20 O4	194.94771, 176.93719	405	N/A	N/A	1773016	Pharmaceutical
Galaxolide	259.205	11	161.3	109.8	445.1	233.2	258.198	[M+H]+1	-3.2	C18 H26 O	185.02849, 175.11078	109	143	5.6	1222-05-5	Personal care product
1-Tetradecanamine	258.278	9.9	51.3	16.8	0	0	257.272	[M+H]+1	-3.1	C16 H35 N O	85.10096, 57.07006	18	268	6.2	112-72-1	Industrial chemical
N-(2-hydroxypropyl)dodecanamide	258.242	10.6	75.5	20.1	18.4	19.6	257.236	[M+H]+1	-3.1	C15 H31 N O2	198.22054, 57.07006	50	N/A	N/A	4292-10-08	Industrial chemical
dimethachlor	256.109	10.1	66	20	337.1	22	255.103	[M+H]+1	-4.3	C13 H18 Cl N O2	148.11111, 133.08786	128	N/A	2.55	50563-36-5	Pharmaceutical
Lamotrigine	256.014	0.7	83.5	92	72.2	79.9	255.008	[M+H]+1	-3.5	C9 H7 Cl2 N5	218.98257, 190.98746	25	N/A	0.85	84057-84-1	Pharmaceutical
Alibendol	252.122	9.5	88.4	19.1	36.2	849.1	251.116	[M+H]+1	-4	C13 H17 N O4	206.11656, 192.10063	393	N/A	N/A	73504-20-8	Pharmaceutical
Matrine	249.197	9.6	16.6	20.1	14.9	17.8	248.189	[M+H]+1	2.7	C15 H24 N2 O	231.18623, 161.10789	162	N/A	0	519-02-8	Pharmaceutical
Reynosin	249.148	19.8	96.8	205.7	87.1	181	248.141	[M+H]+1	-4.1	C15 H20 O3	207.05280, 163.02669	512	N/A	N/A	56834-45-8	Natural product
Diallyl Phthalate	247.096	9.5	1198.3	1406.4	503.2	2409.6	246.089	[M+H]+1	-3.8	C14 H14 O4	131.0848, 105.06961	269	290	2.5	131-17-9	Industrial chemical
Allylescaline	238.143	0.8	57.2	112.1	69.6	962.2	237.137	[M+H]+1	-4.8	C13 H19 N O3	163.08549, 91.05713	321	N/A	N/A	16840-08-7	Pharmaceutical
Buturon	237.078	12.3	3878.3	8182.4	0	4537.4	236.072	[M+H]+1	-3.4	C12 H13 Cl N2 O	223.06244, 91.05708	97	N/A	2.6	3766-06-01	Pesticide
Pterosin G	235.132	9.3	11329.9	17140.3	4239.4	16015.6	234.126	[M+H]+1	-4.3	C14 H18 O3	119.08506, 105.06960	518	N/A	N/A	31835-23-1	Natural product
N,N-Dimethyldodecylamine-N-oxide	230.247	9.7	356.6	198.2	148.3	0	229.241	[M+H]+1	-4.4	C14 H31 N O	83.08527, 57.07006	23	N/A	2.5	1643-20-5	Industrial chemical
Formetanate	222.123	16.2	220.5	382.4	210.9	110.8	221.116	[M+H]+1	-3.6	C11 H15 N3 O2	194.09196, 180.07628	239	N/A	1.6	22259-30-9	Pesticide
2,3,4,9-Tetrahydro-6-methoxy-1H-pyrido(3,4-b)indol-1-one	217.097	9.7	245.1	107.2	2292.9	16.6	216.09	[M+H]+1	0	C12 H12 N2 O2	158.05904, 130.06444	594	N/A	N/A	105051-22-3	Pharmaceutical
Ethyl butylacetylaminopropionate	216.158	9.4	527.1	1274.1	171.7	1132	215.152	[M+H]+1	-4.8	C11 H21 N O3	188.10579, 160.07483	174	N/A	N/A	52304-43-5	Personal care product
3,4-Dimethoxycinnamic acid	209.08	9	1380.3	583.9	578.7	2079.1	208.074	[M+H]+1	-4.8	C11 H12 O4	127.12236, 91.05399	2	N/A	2	2316-09-08	Food additive
Aspirin	181.049	15.9	0	0	0	518.5	180.042	[M+H]+1	-4	C9 H8 O4	102.96997, 84.95947	175	140	1.3	50-78-2	Pharmaceutical
Hydroxycinnamic acid	165.054	7.6	33.5	49.1	26.2	47.2	164.047	[M+H]+1	-4.7	C9 H8 O3	137.02853, 105.00304	207	N/A	2	14755-02-3	Pharmaceutical
Nicotine	163.124	9.3	15.4	19.4	13.1	16.9	162.116	[M+H]+1	4.7	C10 H14 N2	105.03323, 95.04897	4	247	1.17	54-11-5	Pharmaceutical
Meglutol	163.06	8.9	0	0	0	102.1	162.053	[M+H]+1	-4	C6 H10 O5	115.05383, 91.05405	120	N/A	N/A	322-79-2	Pharmaceutical
3,4-Dihydrocoumarin	149.06	17	81.7	188	0	0	148.052	[M+H]+1	-0.6	C9 H8 O2	84.95952, 70.98031	168	261	1.55	119-84-6	Food additive
Glycidyl methacrylate	143.07	7.9	612.1	0	0	163.7	142.063	[M+H]+1	-4.7	C7 H10 O3	69.03339, 55.05424	381	189	0.8	106-91-2	Industrial chemical
N-Nitrosodipropylamine	131.117	7.9	21.7	192.8	25.9	220.4	130.111	[M+H]+1	-4.9	C6 H14 N2 O	98.98386, 72.04423	167	206	1.4	621-64-7	Industrial chemical
Melamine	127.072	0.8	186.1	133.6	108.7	314	126.065	[M+H]+1	-4.7	C3 H6 N6	85.0510, 68.0244	6	350	-0.75	108-78-1	Industrial chemical
3-Methylcatechol	125.059	8.3	1412.9	817.3	3236.7	1723.2	124.052	[M+H]+1	-4.8	C7 H8 O2	108.0210, 123.0440	157	243	1.65	503-86-6	Natural product
Indoline	120.08	2.8	14.9	64	15.8	137	119.073	[M+H]+1	-4.1	C8 H9 N	103.0595, 91.5399	65	221	2	496-15-1	Pharmaceutical
N-Nitrosodiethylamine	103.086	13.9	69.5	39.5	67.4	143	102.079	[M+H]+1	-3	C4 H10 N2 O	75.091, 103.0862	61	177	0.5	55-18-5	Industrial chemical
N-Nitrosopyrrolidine	101.071	0.8	35	14	60	11.1	100.064	[M+H]+1	-2.5	C4 H8 N2 O	70.0651, 55.0542	77	214	0.25	930-55-2	Industrial chemical
1-Methyl-2-pyrrolidone	100.075	9.4	0	0	0	4570	99.0684	[M+H]+1	-3.3	C5 H9 N O	69.03291, 58.02891	132	202	-0.6	872-50-4	Industrial chemical
Cyclohexanone	99.0802	5.1	0	0	10847.9	10739.8	98.0732	[M+H]+1	-2.8	C6 H10 O	70.0651, 55.0542	242	156	0.9	108-94-1	Pesticide
N,N-Dimethylacetamide	88.0754	6.8	20322.4	10461.5	12509.7	11012.2	87.0684	[M+H]+1	-2.9	C4 H9 N O	58.0281, 43.0184	90	166	-0.7	127-19-5	Industrial chemical
Pyridine	80.0493	15.6	60.3	113.2	81.5	56.1	79.0422	[M+H]+1	-2.8	C5 H5 N	53.0416, 52.0338	11	115	0.65	110-86-1	Natural product
N-Nitrosodimethylamine	75.0551	1.9	847.9	919	1262.6	1089.2	74.048	[M+H]+1	-2.2	C2 H6 N2 O	58.0281, 75.0551	14	153	-0.35	62-75-9	Industrial chemical
Dimethylformamide	74.0599	4.1	9487.7	11353.1	0	0	73.0528	[M+H]+1	-2.6	C3 H7 N O	59.0604, 74.05985	29	153	-0.9	68-12-2	Pesticide
Isobutyraldehyde	73.0646	5.8	0	10955.9	10828.5	13560.2	72.0575	[M+H]+1	-2.4	C4 H8 O	57.0332, 73.06462	36	64	0.7	78-84-2	Industrial chemical
Acrylamide	72.0442	7.8	0	169.4	0	791.7	71.0371	[M+H]+1	-2.2	C3 H5 N O	55.0297, 72.04424	29	125	-0.7	79-06-1	Industrial chemical
Acetone	59.0493	2.1	21049.2	24746.7	28751	43086.1	58.0419	[M+H]+1	2.3	C3 H6 O	59.04927*	19	56	-0.24	67-64-1	Industrial chemical
4-(2,5-Diethoxy-4-nitrophenyl)morpholine	297.143	0.9	9.4	45.8	18.3	36.6	296.137	[M+H]+1	-3.5	C14 H20 N2 O5	283.02933, 268.99814	63	N/A	N/A	5220-41-7	Natural product
Diethanolamine	106.086	5.4	38.1	50.7	50.7	84.6	105.079	[M+H]+1	-2.3	C4 H11 N O2	72.99792, 56.04966	34	270	-1.45	111-42-2	Personal care product
Tert-Butyl Hydroperoxide	91.0751	1.8	676.8	543.1	511.2	512.8	90.0681	[M+H]+1	-2.2	C4 H10 O2	73.0650, 53.00252	34	111	0.6	75-91-2	Industrial chemical
Paeonol	165.056	10.7	333.7	295.5	153.1	107.1	166.063	[M-H]-1	1	C9 H10 O3	149.0603, 121.0666	421	N/A	1.65	103-93-5	Pharmaceutical
(4-Chloro-2-methylphenoxy)acetic acid (MCPA)	199.017	11.3	0.5	3.5	2.3	12	200.024	[M-H]-1	0.5	C9 H9 Cl O3	155.0268, 141.0113	144	N/A	2.65	94-74-6	Pesticide
Saccharin	181.992	2.7	8.5	1.1	17.9	2825	182.999	[M-H]-1	0.7	C7 H5 N O3 S	139.0241, 121.0135	14	229	-0.85	81-07-2	Food additive
Sebacic acid	201.113	13.6	311.9	0	0	0	202.12	[M-H]-1	0.7	C10 H18 O4	157.1330, 139.1224	269	343	1.6	111-20-6	Pharmaceutical
Benzothiazole-2-sulfonic acid	213.964	10.3	1479.3	239.6	232.6	2636.1	214.971	[M-H]-1	0.8	C7 H5 N O3 S2	134.00700, 57.97505	6	N/A	N/A	87-03-6	Industrial chemical
Dibutyl phthalate	277.144	13	2301	2595.1	2749.1	2085.8	278.152	[M-H]-1	-0.1	C16 H22 O4	149.0234, 121.0285	248	340	4.6	84-74-2	Industrial chemical
2-(4-Nonylphenoxy)Acetic Acid	277.181	13.2	599.1	16	237	906	278.188	[M-H]-1	0	C17 H26 O3	219.1749, 112.9889	158	N/A	5.5	3115-49-9	Industrial chemical
Linoleic acid	279.233	13.7	10.4	155.5	96.9	23.9	280.24	[M-H]-1	-0.2	C18 H32 O2	261.2218, 245.2269	192	230	6.25	60-33-3	Natural product
Triclosan	286.944	13	6.3	51.5	276.8	36.1	287.951	[M-H]-1	0.2	C12 H7 Cl3 O2	183.17546, 80.91653	14	N/A	4.85	3380-34-5	Pharmaceutical
Coriolic acid	295.228	13.1	20.1	443.8	191.5	92.6	296.235	[M-H]-1	-0.1	C18 H32 O3	295.13675, 57.03394	122	N/A	N/A	17290-79-8	Industrial chemical
Imazaquin	310.12	11.8	5.7	20.4	15	342.8	311.127	[M-H]-1	1.1	C17 H17 N3 O3	217.01302, 183.01196	2	N/A	0.1	81335-37-7	Pesticide
Sucralose	395.007	8.4	0.9	0	435.5	0	396.015	[M-H]-1	0.8	C12 H19 Cl3 O8	383.19266, 361.0385	3	N/A	-0.5	56038-13-2	Food additive
Benzoic acid	121.03	12.7	881.3	271.9	309.7	0	122.037	[M-H]-1	0.5	C7 H6 O2	108.02184, 95.0183	45	249.2	1.87	65-85-0	Food additive
Monobutyl Phthalate (MBP)	221.082	14.2	422.4	0	0	17.5	222.089	[M-H]-1	0.1	C12 H14 O4	149.0971, 121.0290	635	N/A	2	131-70-4	Industrial chemical
B.P. (oC) and log Kow collected from PubChem database; ChemSpider database; EPA, 2011; Li Xie et al., 2021

## Sheet: level 4 & 5
Table S7 List of compounds at confidence level 4&5 and their properties
Name	Precursor ion m/z	Mean RT (min)	Average peak intensity (105)				Neutral (Da)	Reference Ion	Mass error (ppm)	B.P.(ºC)	log Kow	CAS NO	Chemical formula	Category
			CPR	PhR	PIR	UTR
Pantethine	555.253	9.6	16.6	20.3	33.4	14.5	554.244	[M+H]+1	2.3	987.2	-0.06	303-05-9	C22 H42 N4 O8 S2	Pharmaceutical
Telmisartan	515.244	9.1	9.3	15.5	7.9	9.9	514.237	[M+H]+1	-1.14	771.9	8.42	144701-48-4	C33 H30 N4 O2	Pharmaceutical
Acetildenafil	467.276	10.1	65	93.6	41.7	75.2	466.269	[M+H]+1	-1.31	760	N/A	831217-01-7	C25 H34 N6 O3	Pharmaceutical
UV Absorber 234	448.238	9.8	2202.1	1251.2	701.2	531.5	447.231	[M+H]+1	-0.9	589.3	6.78	70321-86-7	C30 H29 N3 O	Industrial chemical
Irbesartan	429.238	12	0	0	0	350.2	428.233	[M+H]+1	-4.87	648.6	5.31	138402-11-6	C25 H28 N6 O	Pharmaceutical
Cholic acid	409.294	10.8	0	0	18.2	77.2	408.288	[M+H]+1	-1.89	583.9	2.02	81-25-4	C24 H40 O5	Natural product
Azoxystrobin	404.126	7.3	0	63	0	0	403.117	[M+H]+1	4.11	581.3	2.5	131860-33-8	C22 H17 N3 O5	Pesticide
Dexamethasone	393.207	9.3	17.7	963.8	20.7	94	392.2	[M+H]+1	-0.42	568.2	1.83	50-02-2	C22 H29 F O5	Pharmaceutical
Bis-(2-ethylhexyl) phthalate	391.283	10.2	82.9	94.5	157.8	208.9	390.277	[M+H]+1	-3.62	385	7.5	117-81-7	C24 H38 O4	Industrial chemical
Pregnenolone acetate	359.257	10.4	354.8	84.8	15.9	114.7	358.251	[M+H]+1	-2.82	457.3	4.3	1778-02-5	C23 H34 O3	Pharmaceutical
BISPHENOL A (2 3-DIHYDROXYPROPYL) GLYCID	359.184	18.8	6.2	90.5	5.7	6.3	358.178	[M+H]+1	-4.82	460	3.4	76002-91-0	C21 H26 O5	Industrial chemical
Dicyclohexyl phthalate	331.189	18.8	17.7	219.4	6.1	6.8	330.183	[M+H]+1	-4.83	451.8	4.82	84-61-7	C20 H26 O4	Industrial chemical
Flutolanil	324.119	9.9	10.5	12.4	10.7	10.1	323.113	[M+H]+1	-3.95	420	3.5	66332-96-5	C17 H16 F3 N O2	Pesticide
Chlorpromazine	319.104	0.9	0	10.4	94.1	9.6	318.096	[M+H]+1	3.98	400	5.3	50-53-3	C17 H19 Cl N2 S	Pharmaceutical
Brompheniramine	319.08	8.8	12.6	45.7	12.1	28.3	318.073	[M+H]+1	-2.12	380	3.5	86-22-6	C16 H19 Br N2	Pharmaceutical
Traversianal	317.21	9.6	191.6	243.4	129.4	260.7	316.204	[M+H]+1	-3.53	458.9	N/A	108605-66-9	C20 H28 O3	Pesticide
Progesterone	315.231	10.2	48.5	69.1	22.9	90.1	314.225	[M+H]+1	-3.11	537.7	3.87	57-83-0	C21 H30 O2	Pharmaceutical
L-Glutamic acid	313.069	9.7	11.4	35.3	13.1	23.7	312.063	[M+H]+1	-4.22	215	-3.22	56-86-0	C17 H12 O6	Food additive
Sclareol	309.278	10.4	13.6	46.2	13.4	22.7	308.272	[M+H]+1	-4.06	218–220 (at 19 mmHg)	N/A	515-03-7	C20 H36 O2	Natural product
Betaxolol	308.221	9.1	31.2	51.4	51.8	28.2	307.215	[M+H]+1	-4.17	448 (at 760 mmHg)	2.78	63659-18-7	C18 H29 N O3	Pharmaceutical
Tolnaftate	308.111	8.3	35.6	166.1	18.1	31	307.103	[M+H]+1	2.63	437.6	5.3	2398-96-1	C19 H17 N O S	Pesticide
cis-3-(2,5-Dimethylphenyl)-4-hydroxy-8-methoxy-1-azaspiro[4.5]decan-2-one	304.189	9.2	37.8	21.3	15.3	31.2	303.183	[M+H]+1	-4.28	521.4 (at 760 mmHg)	3.31	203312-38-3	C18 H25 N O3	Pesticide
11-Keto-testosterone	303.194	9.3	212.6	309.6	109.6	225.7	302.188	[M+H]+1	-4.5	476.8	3.61	564-35-2	C19 H26 O3	Natural product
Phenmedipham	301.118	9.6	16.2	21.4	14.8	18.2	300.111	[M+H]+1	0.69	81.6	N/A	13684-63-4	C16 H16 N2 O4	Pesticide
Quinalphos	299.061	8.7	12	42.6	30	13.6	298.054	[M+H]+1	-0.88	142	4.4	13593-03-8	C12 H15 N2 O3 P S	Pesticide
Cryptotanshinone	297.147	9.7	288.4	62.5	26.1	133.5	296.141	[M+H]+1	-4.8	459 ± 45 (at 760 mmHg)	4.4	35825-57-1	C19 H20 O3	Natural product
Tanshinone II	295.132	9.5	10.7	14.9	10.3	44.6	294.126	[M+H]+1	-4.22	480.7 (at 760 mmHg)	4.4	568-72-9	C19 H18 O3	Natural product
Tutin	295.116	18.8	9.4	77.3	0	9.4	294.11	[M+H]+1	-3.97	356.07	−0.36	2571-22-4	C15 H18 O6	Natural product
Paclobutrazol	294.135	9.9	46.1	14.6	12.8	12.2	293.13	[M+H]+1	-4.98	460.9 ± 55.0	3.2	76738-62-0	C15 H20 Cl N3 O	Pesticide
BENZYLDIPHENYLPHOSPHINE OXIDE	293.11	7.7	16.3	118.5	18.2	34.1	292.102	[M+H]+1	3.48	399	N/A	2959-74-2	C19 H17 O P	Industrial chemical
2-(2-Ethoxyethoxy)ethanol	291.179	0.5	11.4	16.9	21.4	45.6	134.094	[2M+Na]+1	0.7	196–202	-0.54	111-90-0	C6 H14 O3	Personal care product
Androstenedione	287.2	9.3	35.3	52.5	20.2	54.8	286.193	[M+H]+1	-3.67	431.4	2.75	63-05-8	C19 H26 O2	Pharmaceutical
Metominostrobin	285.124	10	14.7	18.2	14.1	14.4	284.116	[M+H]+1	2.57	N/A	N/A	133408-50-1	C16 H16 N2 O3	Pesticide
Bis(2-methoxyethyl) phthalate	283.116	8.7	3432.6	1823.5	932.7	3582.5	282.11	[M+H]+1	-3.74	340	2.9	117-82-8	C14 H18 O6	Industrial chemical
Cycloheximide	282.169	0.8	14.4	63.1	256.5	779.6	281.163	[M+H]+1	-3.37	N/A	N/A	66-81-9	C15 H23 N O4	Pharmaceutical
L-Aspartyl-L-Phenylalanine	281.112	8	106.4	253.4	34.3	68.9	280.106	[M+H]+1	-4.21	528.4 ± 60.0	1.79	13433-09-5	C13 H16 N2 O5	Food additive
Metolachlor OA	280.153	7.6	63.8	68.5	15.1	63.9	279.147	[M+H]+1	-3.98	100	N/A	152019-73-3	C15 H21 N O4	Pesticide
Shogaol	277.179	18.6	0	134.8	0	0	276.173	[M+H]+1	-4.01	427.5	N/A	23513-13-5	C17 H24 O3	Natural product
Dihydromethysticin	277.106	9.2	82.8	88.2	62.9	95.2	276.1	[M+H]+1	-3.5	476.1	N/A	19902-91-1	C15 H16 O5	Pharmaceutical
Nandrolone	275.2	9.6	120.7	205	148.2	163.3	274.193	[M+H]+1	-3.35	~357.4 (estimated)	~3.00	434-22-0	C18 H26 O2	Pharmaceutical
Nitenpyram	271.095	9.4	98.5	26.1	32.1	89.1	270.088	[M+H]+1	-1.5	N/A	N/A	150824-47-8	C11 H15 Cl N4 O2	Pesticide
Metoprolol	268.19	9.8	114.2	201.2	0	103.2	267.183	[M+H]+1	-3.78	398.6 (at 760 mmHg)	1.79	37350-58-6	C15 H25 N O3	Pharmaceutical
Tributyl phosphate	267.173	10.5	0	12.6	18.9	26.7	266.165	[M+H]+1	4.93	289	N/A	126-73-8	C12 H27 O4 P	Industrial chemical
Albendazole	266.095	9.8	12.4	15.2	36.9	12.9	265.089	[M+H]+1	-3.01	N/A	N/A	54965-21-8	C12 H15 N3 O2 S	Pharmaceutical
Phebalosin	259.096	9.9	81.3	22.9	116.5	45.2	258.089	[M+H]+1	-3.33	418.8	N/A	6545-99-9	C15 H14 O4	Pharmaceutical
dextrorphan	258.185	8.3	14.8	151.9	149	37	257.178	[M+H]+1	-2.44	229–232	2.9	125-71-3	C17 H23 N O	Pharmaceutical
1-(2,4-Dichlorophenyl)-2-(1,2,4-triazol-1-yl)ethanol	258.019	9.4	386.5	20.3	13.4	16.1	257.012	[M+H]+1	-3.18	N/A	2.1	79017-06-0	C10 H9 Cl2 N3 O	Pesticide
Pterostilbene	257.116	9.4	98.8	84.4	26.8	364.2	256.11	[M+H]+1	-3.3	~420	3.6	537-42-8	C16 H16 O3	Natural product
Diphenyl phosphate	251.048	8.8	13.4	45.5	11.3	48.7	250.04	[M+H]+1	3.24	280	4.1	115-86-6	C12 H11 O4 P	Industrial chemical
3-(4-hydroxy-5-oxo-3-phenyl-2H-furan-2-yl)propanoic acid	249.075	8.4	128.8	202.4	100.1	128.9	248.069	[M+H]+1	-3.6	N/A	N/A	105364-56-5	C13 H12 O5	Pharmaceutical
Suberosin	245.116	9.6	987.1	1000.1	506.8	1227.9	244.11	[M+H]+1	-3.76	393.3	N/A	18942-62-0	C15 H16 O3	Natural product
Eleutherol	245.08	9.5	28.6	18.1	42.5	60	244.074	[M+H]+1	-3.99	N/A	N/A	574-84-5	C14 H12 O4	Pesticide
Cyanazine	241.097	9.8	19.4	26.5	18.5	25.9	240.089	[M+H]+1	1.68	N/A	2.3	21725-46-2	C9 H13 Cl N6	Pesticide
Costunolide	233.153	18.6	73	116.5	55.1	118	232.146	[M+H]+1	-4.53	N/A	2.6	553-21-9	C15 H20 O2	Pharmaceutical
osthenol	231.101	9.2	1052.2	1002.6	430.7	1035	230.094	[M+H]+1	-3.88	N/A	N/A	481-46-9	C14 H14 O3	Natural product
Pteleine	230.08	9.1	107.8	145.6	110.1	135.8	229.074	[M+H]+1	-4.35	N/A	N/A	477-90-7	C13 H11 N O3	Natural product
Bisphenol A	229.121	9.7	598.7	1036.7	238.1	1383.7	228.115	[M+H]+1	-4.12	220–250	3.3	80-05-7	C15 H16 O2	Industrial chemical
cis-Resveratrol	229.085	9.2	160.9	90.5	19.4	183.3	228.079	[M+H]+1	-3.75	N/A	3.1	501-36-0	C14 H12 O3	Natural product
Dicyclohexylurea	225.195	19	5.2	24	24.5	22.8	224.189	[M+H]+1	-4.91	N/A	4.2	101-83-7	C13 H24 N2 O	Industrial chemical
Bufexamac	224.127	3.7	20.3	37.3	0	6.1	223.121	[M+H]+1	-4.98	N/A	3.1	2438-72-4	C12 H17 N O3	Pharmaceutical
Mexacarbate	223.143	7.6	259.9	57.6	29	159.3	222.137	[M+H]+1	-4.82	N/A	2.7	315-18-4	C12 H18 N2 O2	Pesticide
Carbofuran	222.111	18.7	7.4	232.9	127.6	145.1	221.105	[M+H]+1	-4.85	170–172	2.3	1563-66-2	C12 H15 N O3	Pesticide
Pterosin B	219.137	7.9	10.8	6131.8	18.6	288.9	218.131	[M+H]+1	-4.94	N/A	N/A	10440-05-4	C14 H18 O2	Natural product
Pyracarbolid	218.117	9	231.6	105.3	126.6	299.8	217.11	[M+H]+1	-4.75	N/A	N/A	34622-58-7	C13 H15 N O2	Pesticide
Imidacloprid urea	212.059	7.3	84.4	46.6	10.7	15.3	211.051	[M+H]+1	1.22	N/A	N/A	155584-75-7	C9 H10 Cl N3 O	Pesticide
Desnitro-imidacloprid	211.074	9.6	79.3	122	30.5	83.3	210.067	[M+H]+1	-1.71	N/A	N/A	135410-20-7	C9 H11 Cl N4	Pesticide
Dexibuprofen	207.137	9.9	435.6	700	271.7	657.2	206.131	[M+H]+1	-4.56	157–158	3.5	51146-56-6	C13 H18 O2	Pharmaceutical
5,7-Dimethoxycoumarin	207.064	0.5	0	6.4	4.6	3.9	206.058	[M+H]+1	-4.73	N/A	N/A	531-59-9	C11 H10 O4	Pharmaceutical
Monuron	199.064	7	4.8	9.3	5.1	12.4	198.056	[M+H]+1	1.13	180–182	2.1	150-68-5	C9 H11 Cl N2 O	Pesticide
7-Methoxy-4-methylcoumarin	191.069	8.4	146.4	168.5	17.3	50.3	190.063	[M+H]+1	-4.94	N/A	N/A	121-33-5	C11 H10 O3	Natural product
Benzo[g]quinoline	180.08	6.7	22.3	565.1	225.4	417	179.073	[M+H]+1	-4.76	N/A	N/A	85-02-9	C13 H9 N	Industrial chemical
5-Phenylvaleric acid	179.106	11.9	0	146.7	0	0	178.099	[M+H]+1	-4.21	N/A	N/A	45508	C11 H14 O2	Natural product
Deisopropylatrazine	174.054	8.1	23.3	126.1	18.9	120.3	173.047	[M+H]+1	-1.51	N/A	N/A	6190-65-4	C5 H8 Cl N5	Pesticide
Propenoic acid 2-(dimethylamino)ethyl ester	144.101	8.9	18.6	53.5	17.8	34.3	143.095	[M+H]+1	-4.42	N/A	N/A	105-63-5	C7 H13 N O2	Industrial chemical
Butyl acrylate	129.09	14.2	0	170.9	0	0	128.084	[M+H]+1	-4.82	145	2.3	141-32-2	C7 H12 O2	Industrial chemical
Naphthalene	129.069	9.5	35.9	56.6	22	87.8	128.063	[M+H]+1	-4.84	218	3.3	91-20-3	C10 H8	Industrial chemical
Nitrobenzene	124.039	5.6	0	0	1192.3	0	123.032	[M+H]+1	-4.49	210.9	1.85	98-95-3	C6 H5 N O2	Industrial chemical
2-Isobutoxyethanol	119.106	3.7	13.3	8.6	0	0	118.099	[M+H]+1	-2.5	N/A	N/A	14634-35-6	C6 H14 O2	Industrial chemical
2-Hydroxyethyl acrylate	117.054	7.7	0	197.3	0	97.2	116.047	[M+H]+1	-3.76	213	0.47	818-61-1	C5 H8 O3	Industrial chemical
2-Aminophenol	110.06	8.5	1456.6	0	791.4	1081.6	109.053	[M+H]+1	-2.67	174	0.62	95-55-6	C6 H7 N O	Industrial chemical
Ethyl acrylate	101.059	5.6	0	2849.6	2095.1	3468.2	100.052	[M+H]+1	-2.55	99.4	1.2	140-88-5	C5 H8 O2	Industrial chemical
Methyl acrylate	87.0438	8	0	696.2	3659.1	732.8	86.0368	[M+H]+1	-2.52	80	0.73	96-33-3	C4 H6 O2	Industrial chemical
Acetone Cyanohydrin	86.0598	2.1	110.7	130.1	0	151.6	85.0528	[M+H]+1	-2.94	120	-0.2	75-86-5	C4 H7 N O	Industrial chemical
Cyclohexane	85.101	20.1	12.8	5.5	34.4	18	84.0939	[M+H]+1	0.05	80.7	3.4	110-82-7	C6 H12	Pesticide
1,3-Dioxolane	75.0439	8.6	0	70.1	0	39.4	74.0368	[M+H]+1	-2.14	74	-0.37	646-06-0	C3 H6 O2	Pharmaceutical
Acrylic acid	73.0282	3.8	0	617.2	0	466.9	72.0211	[M+H]+1	-2.46	141	0.35	79-10-7	C3 H4 O2	Industrial chemical
Isoprene	69.0698	20.1	270.8	439.8	968.5	397.3	68.0626	[M+H]+1	-1.16	34	2.42	78-79-5	C5 H8	Industrial chemical
Ethanolamine	62.0601	1.3	12.7	0	0	0	61.0528	[M+H]+1	1.13	170	-1.31	141-43-5	C2 H7 N O	Personal care product
1,3-Butadiene	55.0545	16.2	83.9	0	81.5	0	54.047	[M+H]+1	3.5	-4.4	1.99	106-99-0	C4 H6	Industrial chemical
Acesulfame	161.987	2.1	1.1	49.8	45.6	98	162.994	[M-H]-1	0.45	N/A	-1.3	33665-90-6	C4 H5 N O4 S	Food additive
Decanoic acid	171.139	12.8	2.3	1.3	1.3	15.4	172.146	[M-H]-1	-0.07	268	4.09	334-48-5	C10 H20 O2	Industrial chemical
Benzotrichloride	192.938	12.5	2.9	16.4	2.8	28.1	193.946	[M-H]-1	0.14	213	3.3	98-07-7	C7 H5 Cl3	Pesticide
dinotefuran	201.1	9.4	2.5	2.4	50.9	2.8	202.107	[M-H]-1	1.12	136	-0.55	165252-70-0	C7 H14 N4 O3	Pesticide
3,4-Dichlorophenylurea	202.979	11.9	1.1	3.7	8.1	14.3	203.986	[M-H]-1	0.53	N/A	N/A	101-20-2	C7 H6 Cl2 N2 O	Pesticide
Mecoprop	213.033	9.8	1.1	0.6	1.5	1.8	214.04	[M-H]-1	0.78	200	2.8	93-65-2	C10 H11 Cl O3	Pesticide
Clofibric acid	213.033	9.4	1.7	1.7	154.9	2	214.04	[M-H]-1	1.51	242	2.4	882-09-7	C10 H11 Cl O3	Pharmaceutical
N-Demethoxylinuron	216.994	12.1	638.2	7.4	75.9	18.8	218.001	[M-H]-1	-0.26	N/A	N/A	330-55-2	C8 H8 Cl2 N2 O	Pesticide
Genistein	269.046	12.4	2.6	4.2	10.5	28.1	270.053	[M-H]-1	0.43	482	2.9	446-72-0	C15 H10 O5	Natural product
Mianserin N-oxide	279.151	13	14.5	3.9	5.1	29.4	280.158	[M-H]-1	0.96	N/A	N/A	24219-97-4	C18 H20 N2 O	Pharmaceutical
Benomyl	289.13	10	60.9	212.1	73.9	108.9	290.138	[M-H]-1	-3.36	325	1.5	17804-35-2	C14 H18 N4 O3	Pesticide
Tetradecyl sulfate	293.178	12.9	6.9	41.9	36.9	43.4	294.187	[M-H]-1	-4.33	N/A	N/A	1191-50-0	C14 H30 O4 S	Industrial chemical
Ricinoleic acid	297.243	11.2	3.8	28.3	495	178.1	298.251	[M-H]-1	0.06	313	4	141-22-0	C18 H34 O3	Industrial chemical
Perfluorobutane sulfonic acid (PFBS)	298.943	13.5	16.3	4.4	4.8	35.7	299.95	[M-H]-1	0.41	N/A	N/A	375-73-5	C4 H F9 O3 S	Industrial chemical
sulisobenzone	307.028	11.3	1.5	11.3	82.3	45.2	308.036	[M-H]-1	0.59	360	2.3	4065-45-6	C14 H12 O6 S	Pharmaceutical
Triclocarban	312.971	12.9	4.8	2.5	2.2	27.3	313.978	[M-H]-1	0.26	250	4.9	101-20-2	C13 H9 Cl3 N2 O	Personal care product
Maltose	341.108	9.8	2.3	0.7	3	6.4	342.116	[M-H]-1	-3.83	N/A	-3.7	69-79-4	C12 H22 O11	Food additive
Fipronil-desulfinyl	386.965	12.4	2.2	3.1	11.7	24.4	387.972	[M-H]-1	1.26	N/A	N/A	205650-65-3	C12 H4 Cl2 F6 N4	Pesticide
Fipronil sulfide	418.937	14.4	6.1	1.6	2.2	9	419.944	[M-H]-1	0.96	N/A	N/A	120068-37-3	C12 H4 Cl2 F6 N4 S	Pesticide
Fipronil	434.932	12.5	3.6	3.9	27.1	36.2	435.939	[M-H]-1	0.43	200	4	120068-37-3	C12 H4 Cl2 F6 N4 O S	Pesticide
1-Palmitoylcephalin	452.278	13.3	8.6	19	17.2	25.5	453.286	[M-H]-1	0.38	N/A	N/A	65172-31-2	C21 H44 N O7 P	Pharmaceutical
Andrastin A	485.254	14.5	766.5	43.5	39.9	140.5	486.262	[M-H]-1	-0.36	N/A	N/A	1000385-21-2	C28 H38 O7	Natural product
Novaluron	491.004	13.1	5.4	2.1	2.1	22	492.012	[M-H]-1	-1.85	500	5.3	116714-46-6	C17 H9 Cl F8 N2 O4	Pesticide
Heptadecafluorooctanesulfonic Acid	498.93	12.8	6.3	15	12.6	50.4	499.938	[M-H]-1	0.41	N/A	4.49	1763-23-1	C8 H F17 O3 S	Industrial chemical
Methyl 2,4-Dihydroxy-3,6-Dimethylbenzoate	197.08	8.8	235.8	52.9	229.3	378.8	196.074	[M+H]+1	-4.7	360.7	2.6	4707-47-5	C10 H12 O4	Personal care product
Monobenzyl Phthalate (MP)	255.066	12.5	5.6	5.3	24.4	50.1	256.074	[M-H]-1	0.1	359.5	1.06	2528-16-7	C15 H12 O4	Industrial chemical
B.P. (oC) and log Kow collected from PubChem database; ChemSpider database; EPA, 2011; Li Xie et al., 2021

## Sheet: PNEC
Table S8 PNEC concentrations in each compound
No.	Category	Name	Category	Formula	PNEC	Reference
					concentration (mg/L)
1	Pharmaceutical	Bentazone	Pharmaceutical	C10 H12 N2 O3 S	270	7
2		Lidocaine	Pharmaceutical	C14 H22 N2 O	8.2	8
3		Primidone	Pharmaceutical	C12 H14 N2 O2	9.3	ECOTOX
4		Sulfadiazine	Pharmaceutical	C10 H10 N4 O2 S	1.35	9
5		Trimethoprim	Pharmaceutical	C14 H18 N4 O3	1	10
6		Mefenamic acid	Pharmaceutical	C15 H15 N O2	0.428	11
7		Ciprofloxacin	Pharmaceutical	C17 H18 F N3 O3	0.1	9
8		Venlafaxine	Pharmaceutical	C17 H27 N O2	0.092	9
9		17beta-Trenbolone	Pharmaceutical	C18 H22 O2	0.078	12
10		Spiroxamine	Pharmaceutical	C18 H35 N O2	0.02	7
11		Tramadol	Pharmaceutical	C16 H25 N O2	0.007	13
12		17beta-Estradiol	Pharmaceutical	C18 H24 O2	0.002	14
13	Pesticide	Metalaxyl	Pesticide	C15 H21 N O4	120	7
14		Pretilachlor	Pesticide	C17 H26 Cl N O2	32	6
15		Dinoterb	Pesticide	C10 H12 N2 O5	18.6	15
16		2,4-Dinitrophenol	Pesticide	C6 H4 N2 O5	4	ECOTOX
17		2,4-Dichlorophenoxyacetic acid	Pesticide	C8 H6 Cl2 O3	1.3	16
18		Tebuconazole	Pesticide	C16 H22 Cl N3 O	0.578	7
19		Acetamiprid	Pesticide	C10 H11 Cl N4	0.5	6
20		Diuron	Pesticide	C9 H10 Cl2 N2 O	0.32	ECOTOX
21		Terbuthylazine	Pesticide	C9 H16 Cl N5	0.224	17
22		Lenacil	Pesticide	C13 H18 N2 O2	0.17	17
23		Clomazone	Pesticide	C12 H14 Cl N O2	0.167	ECOTOX
24		Thiamethoxam	Pesticide	C8 H10 Cl N5 O3 S	0.14	7
25		Ametryn	Pesticide	C9 H17 N5 S	0.1	7
26		Hexazinone	Pesticide	C12 H20 N4 O2	0.048	7
27		Imidacloprid	Pesticide	C9 H10 Cl N5 O2	0.008	7
28		Buprofezin	Pesticide	C16 H23 N3 O S	0.003	ECOTOX
29		Triazophos	Pesticide	C12 H16 N3 O3 P S	0.003	18
30	Personal care	Butylparaben	Personal care product	C11 H14 O3	20.1	19
31		Galaxolidone	Personal care product	C18 H24 O2	18.4	20
32		Stearic acid	Personal care product	C18 H36 O2	1.5	21
33		Propylparaben	Personal care product	C10 H12 O3	1	22
34	Industrial chemical	Lauryl sulfate	Industrial chemical	C12 H26 O4 S	137	ECOTOX
35		Terephthalic acid	Industrial chemical	C8 H6 O4	380	ECOTOX
36		Perfluorooctanoic acid (PFOA)	Industrial chemical	C8 H F15 O2	18.7	23
37		Benzyl butyl phthalate	Industrial chemical	C19 H20 O4	3.3	24
38		Phenolphthalein	Industrial chemical	C20 H14 O4	0.219	ECOTOX
39		Triphenylphosphine oxide	Industrial chemical	C18 H15 O P	0.012	25
ECOTOX is a website https://cfpub.epa.gov/ecotox/ comprehensive ecotoxicology database maintained by the U.S. Environmental Protection Agency (EPA).
References
1	E. L. Schymanski, J. Jeon, R. Gulde, K. Fenner, M. Ruff, H. P. Singer and J. Hollender, Identifying small molecules via high resolution mass spectrometry: Communicating confidence, Environ. Sci. Technol., 2014, 48, 2097–2098.
2	E. L. Schymanski, H. P. Singer, J. Slobodnik, I. M. Ipolyi, P. Oswald, M. Krauss, T. Schulze, P. Haglund, T. Letzel, S. Grosse, N. S. Thomaidis, A. Bletsou, C. Zwiener, M. Ibáñez, T. Portolés, R. De Boer, M. J. Reid, M. Onghena, U. Kunkel, W. Schulz, A. Guillon, N. Noyon, G. Leroy, P. Bados, S. Bogialli, D. Stipaničev, P. Rostkowski and J. Hollender, Non-target screening with high-resolution mass…
3	European Chemicals Agency, Guidance on Information Requirements and Chemical Safety Assessment - Part B: Hazard assessment, Eur. Chem. Agency, 2011, 1–60.
4	A. Pandey, I. Kasuga, H. Furumai and F. Kurisu, Non-target liquid chromatography high-resolution mass spectrometry screening to prioritize unregulated micropollutants that persist through domestic wastewater treatment, Sci. Total Environ., 2024, 947, 174486.
5	N. Levin, R. M. Salek and C. Steinbeck, From databases to big data, Metab. Phenotyping Pers. Public Healthc., 2016, 317–331.
6	L. Xie, F. Nakajima, I. Kasuga and F. Kurisu, Simultaneous screening for chemically diverse micropollutants in public water bodies in Japan by high-performance liquid chromatography–Orbitrap mass spectrometry, Chemosphere, 2021, 273, 128524.
7	R. Loos, D. Marinov, I. Sanseverino, D. Napierska and T. Lettieri, Review of the 1st Watch List under the Water Framework Directive and recommendations for the 2nd Watch List, 2018.
8	Echa, Guidance on information requirements and chmical safety assessment. Chapter R.10: Characterisation of dose [concentration]-response for environment, Eur. Chem. Agency, 2008, 1–65.
9	S. Zhou, C. Di Paolo, X. Wu, Y. Shao, T. B. Seiler and H. Hollert, Optimization of screening-level risk assessment and priority selection of emerging pollutants – The case of pharmaceuticals in European surface waters, Environ. Int., 2019, 128, 1–10.
10	N. Kraupner, S. Ebmeyer, M. Hutinel, J. Fick, C. F. Flach and D. G. J. Larsson, Selective concentrations for trimethoprim resistance in aquatic environments, Environ. Int., 2020, 144, 106083.
11	O. A. H. Jones, N. Voulvoulis and J. N. Lester, Aquatic environmental assessment of the top 25 English prescription pharmaceuticals, Water Res., 2002, 36, 5013–5022.
12	A. W. Olmstead, P. A. Kosian, R. Johnson, P. E. Blackshear, J. Haselman, C. Blanksma, J. J. Korte, G. W. Holcombe, E. Burgess, A. Lindberg-Livingston, B. A. Bennett, K. K. Woodis and S. J. Degitz, Trenbolone causes mortality and altered sexual differentiation in Xenopus tropicalis during larval development, Environ. Toxicol. Chem., 2012, 31, 2391–2398.
13	H. L. Schoenfuss, E. T. Furlong, P. J. Phillips, T. M. Scott, D. W. Kolpin, M. Cetkovic-Cvrlje, K. E. Lesteberg and D. C. Rearick, Complex mixtures, complex responses: Assessing pharmaceutical mixtures using field and laboratory approaches, Environ. Toxicol. Chem., 2016, 35, 953–965.
14	D. J. Caldwell, F. Mastrocco, P. D. Anderson, R. Länge and J. P. Sumpter, Predicted-no-effect concentrations for the steroid estrogens estrone, 17β-estradiol, estriol, and 17α-ethinylestradiol, Environ. Toxicol. Chem., 2012, 31, 1396–1406.
15	M. Nendza and A. Wenzel, Discriminating toxicant classes by mode of action 1. (Eco)toxicity profiles, Environ. Sci. Pollut. Res., 2006, 13, 192–203.
16	M. Crane, D. Maycock, C. D. Watts, C. Atkinson and I. Johnson., Proposed EQS for Water Framework Directive Annex VIII substances: 2,4-dichlorophenoxy- acetic acid (2,4-D), 2007, 94.
17	M. Junghans, T. Backhaus, M. Faust, M. Scholze and L. H. Grimme, Application and validation of approaches for the predictive hazard assessment of realistic pesticide mixtures, Aquat. Toxicol., 2006, 76, 93–110.
18	H. Liu, B. Yuan and S. Li, Altered quantities and in vivo activities of cholinesterase from Daphnia magna in sub-lethal exposure to organophosphorus insecticides, Ecotoxicol. Environ. Saf., 2012, 80, 118–125.
19	B. Alslev, B. Korsgaard and P. Bjerregaard, Estrogenicity of butylparaben in rainbow trout Oncorhynchus mykiss exposed via food and water, Aquat. Toxicol., 2005, 72, 295–304.
20	Y. Su, F. Li, X. Xiao, H. Li, D. Wang and J. You, Ecological risk of galaxolide and its transformation product galaxolidone: evidence from the literature and a case study in Guangzhou waterways, Environ. Sci. Process. Impacts, 2023, 25, 1337–1346.
21	J. M. Leach and A. N. Thakore, Isolation and identification of constituents toxic to juvenile rainbow trout (Salmo gairdneri) in caustic extraction effluents from kraft pulpmill bleach plants, J.Fish.Res.Board Canada, 1975, 32, 1249–1257.
22	T. Madsen, H. B. Boyd, D. Nylén, A. R. Petersen, G. I. Petersen and F. Simonsen, Environmental and Health Assessment of Substances in Household Detergents and Cosmetic Detergent Products, Environ. Proj., 2001, 615, 1–35.
23	J. Zhang, H. Tao, J. Shi, H. Ge, B. Li, Y. Wang, M. Zhang and X. Li, Deriving aquatic PNECs of endocrine disruption effects for PFOS and PFOA by combining species sensitivity weighted distributions and adverse outcome pathway networks, Chemosphere, 2024, 346, 140583.
24	S. Ai, X. Gao, X. Wang, J. Li, B. Fan, S. Zhao and Z. Liu, Exposure and tiered ecological risk assessment of phthalate esters in the surface water of Poyang Lake, China, Chemosphere, 2021, 262, 1–9.
25	C. C. Lo and T. T. Hsieh, Acute toxicity to the golden apple snail and estimated bioconcentration potential of triphenylphosphine oxide and series of related compounds, Bull. Environ. Contam. Toxicol., 2000, 65, 104–111.
